# Supplementary material for: Transcriptomics of a Giant Freshwater Prawn (Macrobrachium rosenbergii): De Novo Assembly, Annotation and Marker Discovery
Source: PLoS One. 2011 Dec 8;6(12):e27938. doi: 10.1371/journal.pone.0027938 (PMC3234237; doi:10.1371/journal.pone.0027938)
Supplement: Table S1 — Summary of BLASTx results for contigs and singletons of M . rosenbergii . (XLSX) [file pone.0027938.s001.xlsx]

## Sheet: GFP Contigs
	Summary of BlastX results from GFP contigs
Seq. Name	Seq. Description	Seq. Length	#Hits	min. eValue	mean Similarity
A_000001	probable atp-dependent rna helicase ddx5	982	20	1.02589e-128	0.8715
A_000002	gamma-aminobutyric acid receptor-associated protein	694	20	4.04638e-08	0.493
A_000003	---NA---	766	0
A_000004	---NA---	787	0
A_000005	---NA---	506	0
A_000006	myosin heavy isoform p	3931	20	0	0.817
A_000007	oligopeptide transporter	562	20	1.07885e-12	0.643
A_000008	alpha skeletal muscle	710	20	1.19906e-119	0.9505
A_000009	myosin heavy chain	612	20	5.21503e-32	0.926
A_000010	myosin heavy isoform k	3689	20	0	0.82
A_000011	---NA---	652	0
A_000012	protein	896	19	4.03225e-05	0.661053
A_000013	---NA---	748	0
A_000014	---NA---	773	0
A_000015	arginine kinase	666	20	1.29521e-85	0.683
A_000016	myosin heavy chain	1510	20	0	0.8385
A_000017	---NA---	500	0
A_000018	myosin heavy nonmuscle or smooth muscle	1512	20	0	0.836
A_000019	rrna promoter binding protein	586	20	4.0161e-12	0.6625
A_000020	questionable orf	1523	20	2.48505e-23	0.4375
A_000021	hypothetical protein DAPPUDRAFT_67127 [Daphnia pulex]	649	20	1.40548e-20	0.782
A_000022	skeletal muscle actin 6	853	20	1.62144e-109	0.953
A_000023	myosin light chain 2	506	20	1.97114e-44	0.7535
A_000024	actin 1	1187	20	0	0.9545
A_000025	male reproductive-related protein a	807	12	4.50757e-10	0.523333
A_000026	male reproductive-related protein a	508	14	7.18599e-42	0.765714
A_000027	---NA---	545	0
A_000028	male reproductive-related protein a	588	9	6.7405e-07	0.737778
A_000029	troponin invertebrate	3333	20	1.40491e-62	0.788
A_000030	troponin invertebrate	3333	20	9.10638e-62	0.779
A_000031	troponin invertebrate	3122	20	3.66672e-57	0.7935
A_000032	troponin invertebrate	3122	20	2.3767e-56	0.7905
A_000033	troponin invertebrate	2710	20	1.10802e-62	0.788
A_000034	troponin invertebrate	2697	20	1.10214e-62	0.788
A_000035	troponin invertebrate	2710	20	7.182e-62	0.779
A_000036	troponin invertebrate	2697	20	7.1439e-62	0.779
A_000037	troponin invertebrate	2658	20	1.08304e-62	0.788
A_000038	troponin invertebrate	2658	20	7.02007e-62	0.779
A_000039	troponin invertebrate	2582	20	1.05171e-62	0.788
A_000040	troponin invertebrate	2582	20	6.817e-62	0.779
A_000041	troponin invertebrate	2454	20	9.89673e-63	0.788
A_000042	troponin invertebrate	2454	20	6.41488e-62	0.779
A_000043	troponin invertebrate	2545	20	1.03399e-62	0.788
A_000044	troponin invertebrate	2538	20	1.03103e-62	0.788
A_000045	troponin invertebrate	2545	20	6.70211e-62	0.779
A_000046	troponin invertebrate	2538	20	6.68296e-62	0.779
A_000047	troponin invertebrate	2499	20	2.85147e-57	0.7935
A_000048	troponin invertebrate	2486	20	2.83066e-57	0.7935
A_000049	troponin invertebrate	2499	20	1.84827e-56	0.7905
A_000050	troponin invertebrate	2486	20	1.83478e-56	0.7905
A_000051	troponin invertebrate	2447	20	2.77654e-57	0.7935
A_000052	troponin invertebrate	2447	20	1.7997e-56	0.7905
A_000053	troponin invertebrate	2371	20	2.67247e-57	0.7935
A_000054	troponin invertebrate	2371	20	1.73225e-56	0.7905
A_000055	troponin invertebrate	2243	20	2.51049e-57	0.7935
A_000056	troponin invertebrate	2243	20	1.62725e-56	0.7905
A_000057	troponin invertebrate	2334	20	2.6402e-57	0.7935
A_000058	troponin invertebrate	2327	20	2.62764e-57	0.7935
A_000059	troponin invertebrate	2334	20	1.71133e-56	0.7905
A_000060	troponin invertebrate	2327	20	1.70319e-56	0.7905
A_000061	troponin invertebrate	1680	20	6.22466e-63	0.788
A_000062	troponin invertebrate	1680	20	4.03471e-62	0.779
A_000063	troponin invertebrate	1469	20	1.47735e-57	0.7935
A_000064	troponin invertebrate	1469	20	9.57589e-57	0.7905
A_000065	---NA---	1274	0
A_000066	---NA---	1168	0
A_000067	---NA---	1102	0
A_000068	---NA---	1058	0
A_000069	---NA---	958	0
A_000070	p8 nuclear protein	824	20	3.70685e-07	0.7315
A_000071	p8 nuclear protein	817	20	3.65273e-07	0.7315
A_000072	---NA---	647	0
A_000073	---NA---	651	0
A_000074	---NA---	638	0
A_000075	---NA---	611	0
A_000076	---NA---	604	0
A_000077	---NA---	599	0
A_000078	---NA---	545	0
A_000079	---NA---	532	0
A_000080	---NA---	523	0
A_000081	---NA---	395	0
A_000082	---NA---	479	0
A_000083	---NA---	466	0
A_000084	---NA---	493	0
A_000085	---NA---	435	0
A_000086	---NA---	422	0
A_000087	---NA---	427	0
A_000088	---NA---	374	0
A_000089	---NA---	367	0
A_000090	---NA---	383	0
A_000091	---NA---	417	0
A_000092	---NA---	289	0
A_000093	---NA---	154	0
A_000094	---NA---	351	0
A_000095	---NA---	223	0
A_000096	---NA---	335	0
A_000097	---NA---	322	0
A_000098	---NA---	307	0
A_000099	---NA---	179	0
A_000100	---NA---	283	0
A_000101	---NA---	317	0
A_000102	---NA---	207	0
A_000103	---NA---	79	0
A_000104	muscle m-line assembly protein unc-89	4715	20	3.87334e-154	0.647
A_000105	tropomyosin	2777	20	3.46093e-121	0.994
A_000106	tropomyosin	2769	20	3.45205e-121	0.994
A_000107	tropomyosin	2770	20	3.45204e-121	0.994
A_000108	tropomyosin	2768	20	3.44759e-121	0.994
A_000109	tropomyosin	2762	20	3.4387e-121	0.994
A_000110	tropomyosin	2760	20	3.43871e-121	0.994
A_000111	tropomyosin	2773	20	3.45648e-121	0.994
A_000112	tropomyosin	2775	20	3.46094e-121	0.994
A_000113	tropomyosin	2765	20	3.44314e-121	0.994
A_000114	tropomyosin	2767	20	3.4476e-121	0.994
A_000115	tropomyosin	1962	20	2.30388e-121	0.994
A_000116	tropomyosin	1954	20	2.29032e-121	0.994
A_000117	troponin c	645	20	9.35009e-62	0.8735
A_000118	tropomyosin invertebrate	651	20	4.67456e-61	0.831
A_000119	---NA---	886	0
A_000120	sarcoplasmic calcium-binding beta chain	1338	20	1.74684e-86	0.848
A_000121	sarcoplasmic calcium-binding beta chain	1337	20	8.32001e-75	0.841
A_000122	sarcoplasmic calcium-binding beta chain	1338	20	5.60637e-93	0.8605
A_000123	sarcoplasmic calcium-binding beta chain	929	20	1.00221e-86	0.848
A_000124	sarcoplasmic calcium-binding beta chain	928	20	4.80134e-75	0.8465
A_000125	sarcoplasmic calcium-binding beta chain	929	20	3.21653e-93	0.8605
A_000126	sarcoplasmic calcium-binding beta chain	561	20	7.39277e-50	0.8405
A_000127	rna polymerase ii transcriptional coactivator	1176	20	4.16135e-17	0.7035
A_000128	---NA---	848	0
A_000129	fimbriae-associated protein	1721	1	1.18908e-08	0.47
A_000130	---NA---	4027	0
A_000131	---NA---	4000	0
A_000132	---NA---	3919	0
A_000133	---NA---	3892	0
A_000134	---NA---	3576	0
A_000135	---NA---	3549	0
A_000136	---NA---	3549	0
A_000137	---NA---	3522	0
A_000138	---NA---	3480	0
A_000139	---NA---	3468	0
A_000140	---NA---	3441	0
A_000141	---NA---	3453	0
A_000142	---NA---	3441	0
A_000143	---NA---	3414	0
A_000144	---NA---	3372	0
A_000145	---NA---	3345	0
A_000146	---NA---	2837	0
A_000147	---NA---	2729	0
A_000148	---NA---	2217	0
A_000149	---NA---	2190	0
A_000150	---NA---	2109	0
A_000151	---NA---	2082	0
A_000152	---NA---	1766	0
A_000153	---NA---	1667	0
A_000154	---NA---	1739	0
A_000155	---NA---	1739	0
A_000156	---NA---	1712	0
A_000157	---NA---	1670	0
A_000158	---NA---	1658	0
A_000159	---NA---	1631	0
A_000160	---NA---	1643	0
A_000161	---NA---	1631	0
A_000162	---NA---	1604	0
A_000163	---NA---	1666	0
A_000164	---NA---	1562	0
A_000165	---NA---	1535	0
A_000166	---NA---	1027	0
A_000167	---NA---	919	0
A_000168	---NA---	3133	0
A_000169	---NA---	3272	0
A_000170	---NA---	3033	0
A_000171	---NA---	3172	0
A_000172	---NA---	1731	0
A_000173	---NA---	1870	0
A_000174	---NA---	1575	0
A_000175	---NA---	1715	0
A_000176	---NA---	1335	0
A_000177	---NA---	877	0
A_000178	---NA---	621	0
A_000179	---NA---	1572	0
A_000180	---NA---	1457	0
A_000181	---NA---	470	0
A_000182	vacuolar atp synthase 21 kda proteolipid subunit	734	20	4.42938e-19	0.8175
A_000183	---NA---	1447	0
A_000184	---NA---	1275	0
A_000185	---NA---	997	0
A_000186	---NA---	825	0
A_000187	---NA---	742	0
A_000188	---NA---	727	0
A_000189	---NA---	292	0
A_000190	---NA---	277	0
A_000191	male reproductive-related protein	2400	1	3.93738e-40	0.98
A_000192	male reproductive-related protein	2541	1	2.73611e-39	0.97
A_000193	male reproductive-related protein	2350	1	3.86051e-40	0.98
A_000194	male reproductive-related protein	2491	1	2.66956e-39	0.97
A_000195	male reproductive-related protein	2350	1	3.86051e-40	0.98
A_000196	male reproductive-related protein	2491	1	2.66956e-39	0.97
A_000197	---NA---	1298	0
A_000198	male reproductive-related protein	1124	1	9.44874e-40	0.97
A_000199	male reproductive-related protein	1074	1	8.88435e-40	0.97
A_000200	male reproductive-related protein	1074	1	8.88435e-40	0.97
A_000201	---NA---	383	0
A_000202	---NA---	381	0
A_000203		4263
A_000204	zinc finger lsd1 subclass family protein	4128	20	1.27199e-52	0.327
A_000205	serine proteinase inhibitor	1970	20	4.46965e-54	0.503
A_000206	serine proteinase inhibitor	1968	20	4.40498e-51	0.5255
A_000207	serine proteinase inhibitor	1981	20	3.45526e-54	0.4745
A_000208	serine proteinase inhibitor	1970	20	6.33588e-53	0.503
A_000209	serine proteinase inhibitor	1742	20	3.78055e-51	0.471
A_000210	serine proteinase inhibitor	1744	20	3.84466e-54	0.475
A_000211	serine proteinase inhibitor	1755	20	2.97601e-54	0.4745
A_000212	serine proteinase inhibitor	1744	20	5.45005e-53	0.4735
A_000213	male reproductive-related protein a	671	20	6.83771e-26	0.7805
A_000214	serine (or cysteine) peptidase clade member 9g	774	20	3.78641e-11	0.645
A_000215	serine protease inhibitor a3f	445	20	2.34623e-13	0.5545
A_000216	protein	1160	20	2.62673e-24	0.5065
A_000217	protein	1165	20	2.64817e-24	0.5065
A_000218	protein	1167	20	2.65889e-24	0.5065
A_000219	protein	1145	20	2.57312e-24	0.5065
A_000220	protein	1160	20	2.62673e-24	0.5065
A_000221	protein	1165	20	2.64817e-24	0.5065
A_000222	protein	1167	20	2.65889e-24	0.5065
A_000223	protein	1145	20	2.57312e-24	0.5065
A_000224	protein	939	20	1.88404e-24	0.5065
A_000225	protein	939	20	1.88404e-24	0.5065
A_000226	---NA---	1494	0
A_000227	---NA---	1426	0
A_000228	---NA---	1334	0
A_000229	---NA---	1266	0
A_000230	ubiquitin 40s ribosomal protein s27a	1498	20	0	0.9915
A_000231	ubiquitin c	1186	20	0	0.995
A_000232	ubiquitin c	1186	20	0	0.995
A_000233	ubiquitin c	343	20	1.19727e-57	1
A_000234	ubiquitin c	443	20	1.49928e-76	1
A_000235	---NA---	3291	0
A_000236	---NA---	3285	0
A_000237	---NA---	3275	0
A_000238	---NA---	3269	0
A_000239	---NA---	2169	0
A_000240	---NA---	2153	0
A_000241	---NA---	1325	0
A_000242	---NA---	1108	0
A_000243	---NA---	929	0
A_000244	---NA---	857	0
A_000245	---NA---	823	0
A_000246	---NA---	824	0
A_000247	---NA---	751	0
A_000248	---NA---	752	0
A_000249	---NA---	673	0
A_000250	---NA---	562	0
A_000251	---NA---	466	0
A_000252	---NA---	1003	0
A_000253	---NA---	930	0
A_000254	---NA---	1072	0
A_000255	---NA---	999	0
A_000256	glycoprotein 93	508	20	6.78857e-08	0.8435
A_000257	---NA---	471	0
A_000258	---NA---	409	0
A_000259	protein	2065	20	6.63889e-36	0.572
A_000260	protein	2064	20	6.63889e-36	0.572
A_000261	protein	2065	20	6.63889e-36	0.572
A_000262	protein	2038	20	6.53243e-36	0.572
A_000263	protein	1877	20	5.89232e-36	0.604
A_000264	protein	1876	20	5.89232e-36	0.604
A_000265	protein	1877	20	5.89232e-36	0.604
A_000266	protein	1850	20	5.8264e-36	0.604
A_000267	---NA---	745	0
A_000268	---NA---	557	0
A_000269	---NA---	836	0
A_000270	---NA---	617	0
A_000271	---NA---	715	0
A_000272	---NA---	526	0
A_000273	---NA---	499	0
A_000274	---NA---	280	0
A_000275	---NA---	378	0
A_000276	---NA---	319	0
A_000277	---NA---	189	0
A_000278	---NA---	3552	0
A_000279	---NA---	2732	0
A_000280	---NA---	1287	0
A_000281	---NA---	1052	0
A_000282	---NA---	1039	0
A_000283	---NA---	579	0
A_000284	---NA---	344	0
A_000285	---NA---	331	0
A_000286	---NA---	1063	0
A_000287	---NA---	1065	0
A_000288	---NA---	1053	0
A_000289	---NA---	1055	0
A_000290	---NA---	1166	0
A_000291	---NA---	1168	0
A_000292	---NA---	1014	0
A_000293	---NA---	1016	0
A_000294	ovary development-related protein	4091	20	1.53838e-50	0.4065
A_000295	ovary development-related protein	4091	20	1.53838e-50	0.4065
A_000296	ovary development-related protein	4091	20	1.53838e-50	0.4065
A_000297	ovary development-related protein	4091	20	1.53838e-50	0.4065
A_000298	ovary development-related protein	3033	20	1.10525e-50	0.4065
A_000299	---NA---	532	0
A_000300	---NA---	532	0
A_000301	---NA---	537	0
A_000302	---NA---	405	0
A_000303	---NA---	235	0
A_000304	---NA---	1371	0
A_000305	---NA---	1357	0
A_000306	---NA---	2704	0
A_000307	---NA---	2704	0
A_000308	---NA---	2495	0
A_000309	---NA---	2495	0
A_000310	---NA---	2580	0
A_000311	---NA---	2580	0
A_000312	---NA---	1356	0
A_000313	---NA---	1356	0
A_000314	---NA---	1139	0
A_000315	---NA---	1139	0
A_000316	---NA---	1232	0
A_000317	---NA---	1232	0
A_000318	---NA---	443	0
A_000319	---NA---	446	0
A_000320	---NA---	428	0
A_000321	---NA---	489	0
A_000322	---NA---	492	0
A_000323	---NA---	370	0
A_000324	---NA---	474	0
A_000325	---NA---	416	0
A_000326	charged multivesicular body protein 5	1122	20	1.07857e-43	0.8745
A_000327	charged multivesicular body protein 5	1114	20	1.06468e-43	0.8745
A_000328	charged multivesicular body protein 5	1093	20	9.46884e-29	0.837
A_000329	charged multivesicular body protein 5	1085	20	9.34202e-29	0.837
A_000330	eukaryotic peptide chain release factor subunit	909	20	4.59499e-121	0.901
A_000331	charged multivesicular body protein 5	582	20	1.75775e-44	0.8665
A_000332	charged multivesicular body protein 5	553	20	1.07526e-29	0.816
A_000333	---NA---	4686	0
A_000334	---NA---	4667	0
A_000335	---NA---	4674	0
A_000336	---NA---	4655	0
A_000337	---NA---	4675	0
A_000338	---NA---	4656	0
A_000339	---NA---	1772	0
A_000340	---NA---	1770	0
A_000341	---NA---	1767	0
A_000342	---NA---	1677	0
A_000343	---NA---	1675	0
A_000344	---NA---	1672	0
A_000345	---NA---	3763	0
A_000346	---NA---	3394	0
A_000347	---NA---	607	0
A_000348	---NA---	574	0
A_000349	---NA---	267	0
A_000350	gamma-aminobutyric acid receptor-associated protein	2505	20	3.52027e-31	0.7525
A_000351	gamma-aminobutyric acid receptor-associated protein	2316	20	3.21905e-31	0.7525
A_000352	gamma-aminobutyric acid receptor-associated protein	1765	20	2.30502e-31	0.7525
A_000353	gamma-aminobutyric acid receptor-associated protein	1648	20	2.11797e-31	0.7525
A_000354	gamma-aminobutyric acid receptor-associated protein	1370	20	1.6451e-31	0.752
A_000355	upf0547 protein c16orf87-like protein	1286	10	1.20259e-12	0.483
A_000356	upf0547 protein c16orf87-like protein	1271	10	1.18156e-12	0.483
A_000357	upf0547 protein c16orf87-like protein	1141	10	1.00997e-12	0.483
A_000358	apolipoprotein d	1107	20	8.75537e-30	0.541
A_000359	---NA---	474	0
A_000360	isoform e	3862	20	6.4746e-29	0.582
A_000361	isoform e	3798	20	6.35627e-29	0.582
A_000362	hypothetical protein Phum_PHUM596940 [Pediculus humanus corporis]	3672	1	3.77503e-08	0.42
A_000363	hypothetical protein Phum_PHUM596940 [Pediculus humanus corporis]	3608	1	3.69763e-08	0.42
A_000364	isoform e	3592	20	1.34446e-24	0.6195
A_000365	isoform e	3528	20	1.31781e-24	0.6195
A_000366	hypothetical protein Phum_PHUM596940 [Pediculus humanus corporis]	3402	1	0.000887015	0.68
A_000367	hypothetical protein Phum_PHUM596940 [Pediculus humanus corporis]	3338	1	0.000867183	0.68
A_000368	---NA---	330	0
A_000369	keratin associated protein	2011	20	1.34628e-30	0.338
A_000370	keratin associated protein	2008	20	1.34371e-30	0.338
A_000371	keratin associated protein	2010	20	1.34628e-30	0.338
A_000372	keratin associated protein	2007	20	1.34371e-30	0.338
A_000373	tenascin c	2011	20	8.1676e-28	0.344
A_000374	tenascin c	2008	20	8.15202e-28	0.344
A_000375	tenascin c	2010	20	8.1676e-28	0.344
A_000376	tenascin c	2007	20	8.15202e-28	0.344
A_000377	---NA---	480	0
A_000378	---NA---	413	0
A_000379	---NA---	413	0
A_000380	---NA---	432	0
A_000381	---NA---	415	0
A_000382	---NA---	365	0
A_000383	---NA---	365	0
A_000384	---NA---	2077	0
A_000385	---NA---	2055	0
A_000386	---NA---	2077	0
A_000387	---NA---	2008	0
A_000388	---NA---	1986	0
A_000389	---NA---	2008	0
A_000390	copper-translocating p-type atpase	496	20	4.0824e-10	0.705
A_000391	copper-translocating p-type atpase	452	20	4.1057e-10	0.705
A_000392	non-specific lipid-transfer protein	632	20	7.5004e-45	0.6735
A_000393	---NA---	539	0
A_000394	---NA---	495	0
A_000395	conserved plasmodium protein	1581	1	0.000607273	0.7
A_000396	conserved plasmodium protein	1575	1	0.000604102	0.7
A_000397	conserved plasmodium protein	1575	1	0.000604102	0.7
A_000398	conserved plasmodium protein	1575	1	0.000604102	0.7
A_000399	---NA---	1229	0
A_000400	---NA---	1207	0
A_000401	---NA---	1207	0
A_000402	---NA---	1228	0
A_000403	---NA---	801	0
A_000404	---NA---	776	0
A_000405	---NA---	777	0
A_000406	---NA---	806	0
A_000407	alpha skeletal muscle	1141	20	0	0.9445
A_000408	alpha skeletal muscle	1016	20	7.83501e-176	0.95
A_000409	skeletal muscle actin 6	522	20	9.46369e-88	0.949
A_000410	sarcomere length isoform d	2699	20	2.0226e-40	0.543
A_000411	sarcomere length isoform d	2644	20	1.98698e-40	0.543
A_000412	sarcomere length isoform d	2555	20	1.90566e-40	0.543
A_000413	sarcomere length isoform d	2500	20	1.85686e-40	0.543
A_000414	---NA---	1392	0
A_000415	---NA---	1337	0
A_000416	---NA---	1248	0
A_000417	---NA---	1193	0
A_000418	---NA---	376	0
A_000419	---NA---	93	0
A_000420	---NA---	721	0
A_000421	muscle lim protein	5788	20	8.83975e-116	0.6005
A_000422	muscle lim protein	5694	20	8.73663e-116	0.6005
A_000423	muscle lim protein	4595	20	6.93978e-116	0.6005
A_000424	muscle lim protein	4501	20	1.61462e-117	0.6
A_000425	muscle lim protein	1716	20	7.75555e-29	0.7885
A_000426	regulatory protein mlp	1622	20	6.46752e-17	0.8035
A_000427	---NA---	1234	0
A_000428	---NA---	1210	0
A_000429	---NA---	853	0
A_000430	---NA---	790	0
A_000431	---NA---	766	0
A_000432	---NA---	409	0
A_000433	---NA---	600	0
A_000434	---NA---	619	0
A_000435	---NA---	1285	0
A_000436	---NA---	1147	0
A_000437	---NA---	821	0
A_000438	---NA---	683	0
A_000439	---NA---	421	0
A_000440	conserved hypothetical protein [Culex quinquefasciatus]	3387	1	0.000675713	0.44
A_000441	conserved hypothetical protein [Culex quinquefasciatus]	3355	1	0.00066812	0.44
A_000442	---NA---	3333	0
A_000443	---NA---	3301	0
A_000444	---NA---	2561	0
A_000445	---NA---	2065	0
A_000446	---NA---	1068	0
A_000447	---NA---	797	0
A_000448	lim domain-binding	2610	20	1.29465e-84	0.8385
A_000449	lim domain-binding protein	2552	20	3.58049e-47	0.6265
A_000450	---NA---	1035	0
A_000451	---NA---	1363	0
A_000452	---NA---	1343	0
A_000453	---NA---	982	0
A_000454	---NA---	826	0
A_000455	---NA---	1742	0
A_000456	---NA---	1601	0
A_000457	---NA---	1202	0
A_000458	---NA---	1005	0
A_000459	cytochrome c-1	1250	20	1.32977e-93	0.8015
A_000460	remodeling and spacing factor 1	949	10	9.59e-20	0.627
A_000461	remodeling and spacing factor 1	705	20	5.75409e-31	0.749
A_000462	---NA---	476	0
A_000463	male reproductive-related protein mar-mrr	773	10	7.01693e-42	0.969
A_000464	---NA---	995	0
A_000465	---NA---	870	0
A_000466	kazal-type proteinase inhibitor	717	20	6.71819e-72	0.5755
A_000467	kazal-type proteinase inhibitor	716	20	9.80189e-77	0.563
A_000468	kazal-type proteinase inhibitor	696	20	9.23091e-77	0.563
A_000469	kazal-type proteinase inhibitor	668	20	2.21443e-77	0.562
A_000470	---NA---	941	0
A_000471	---NA---	941	0
A_000472	---NA---	618	0
A_000473	---NA---	820	0
A_000474	---NA---	853	0
A_000475	---NA---	417	0
A_000476	---NA---	417	0
A_000477	---NA---	409	0
A_000478	---NA---	373	0
A_000479	---NA---	593	0
A_000480	---NA---	574	0
A_000481	---NA---	543	0
A_000482	---NA---	543	0
A_000483	taxilin alpha	4436	20	5.54809e-62	0.6555
A_000484	taxilin alpha	4364	20	5.48057e-62	0.6555
A_000485	taxilin alpha	4366	20	5.48478e-62	0.6555
A_000486	---NA---	1110	0
A_000487	---NA---	1023	0
A_000488	---NA---	1023	0
A_000489	---NA---	1112	0
A_000490	---NA---	1113	0
A_000491	---NA---	1119	0
A_000492	---NA---	1453	0
A_000493	---NA---	1415	0
A_000494	---NA---	580	0
A_000495	---NA---	575	0
A_000496	---NA---	568	0
A_000497	---NA---	508	0
A_000498	---NA---	503	0
A_000499	---NA---	496	0
A_000500	serum amyloid a	623	20	4.50539e-39	0.7765
A_000501	serum amyloid a	605	20	1.35471e-45	0.786
A_000502	serum amyloid a	598	20	4.23165e-44	0.8065
A_000503	serum amyloid a	580	20	2.63298e-48	0.8065
A_000504	serum amyloid a	570	20	1.16388e-45	0.786
A_000505	serum amyloid a	545	20	2.17608e-48	0.8065
A_000506	innexin 2	2976	20	3.41295e-20	0.4525
A_000507	innexin 2	2832	20	3.21862e-20	0.4525
A_000508	---NA---	1842	0
A_000509	---NA---	1698	0
A_000510	---NA---	512	0
A_000511	juvenile hormone esterase	2730	20	3.51914e-88	0.541
A_000512	actin-like 6b	1793	20	1.00058e-67	0.814
A_000513	esterase fe4-like	1760	20	9.76494e-68	0.6515
A_000514	actin-like 6b	780	20	3.41682e-76	0.811
A_000515	actin-like 6b	747	20	5.18023e-47	0.767
A_000516	---NA---	1503	0
A_000517	---NA---	1486	0
A_000518	---NA---	1377	0
A_000519	---NA---	1360	0
A_000520	---NA---	472	0
A_000521	ftsj methyltransferase domain-containing protein 1-like	5189	20	1.89107e-93	0.551
A_000522	serine protease nudel	4100	20	1.97739e-70	0.4275
A_000523	serine protease nudel	1024	20	4.99274e-21	0.4815
A_000524	n -adenine-specific dna methyltransferase 1	817	20	3.82873e-47	0.716
A_000525	isoform f	2468	20	1.45776e-13	0.5195
A_000526	isoform f	2464	20	1.4556e-13	0.5195
A_000527	isoform f	1854	20	1.03882e-13	0.5195
A_000528	isoform f	1850	20	1.03442e-13	0.5195
A_000529	predicted protein [Nematostella vectensis]	1705	1	7.88275e-05	0.49
A_000530	---NA---	1326	0
A_000531	---NA---	709	0
A_000532	---NA---	703	0
A_000533	---NA---	1448	0
A_000534	---NA---	1384	0
A_000535	---NA---	406	0
A_000536	---NA---	379	0
A_000537	histone h2a	722	20	3.07275e-47	0.993
A_000538	histone h2a	758	20	3.38038e-47	0.993
A_000539	histone h2a	674	20	8.29249e-46	0.979
A_000540	histone h2a	710	20	9.26413e-46	0.979
A_000541	---NA---	846	0
A_000542	---NA---	759	0
A_000543	---NA---	534	0
A_000544	---NA---	396	0
A_000545	---NA---	548	0
A_000546	---NA---	517	0
A_000547	---NA---	491	0
A_000548	---NA---	478	0
A_000549	2 rna ligase family protein	1886	3	0.000260019	0.54
A_000550	---NA---	1863	0
A_000551	---NA---	628	0
A_000552	heterogeneous nuclear ribonucleoprotein	1174	20	3.12968e-65	0.8995
A_000553	heterogeneous nuclear ribonucleoprotein	1088	20	2.79296e-65	0.8995
A_000554	heterogeneous nuclear ribonucleoprotein	991	20	2.41482e-65	0.8995
A_000555	scca2 scca1 fusion protein isoform 1	1988	20	1.94977e-70	0.5235
A_000556	scca2 scca1 fusion protein isoform 1	1943	20	1.89339e-70	0.5235
A_000557	ac1147-like protein	894	20	3.40559e-12	0.95
A_000558	ac1147-like protein	745	20	2.40724e-12	0.95
A_000559	---NA---	691	0
A_000560	---NA---	520	0
A_000561	---NA---	515	0
A_000562	---NA---	373	0
A_000563	---NA---	575	0
A_000564	---NA---	579	0
A_000565	nhl repeat-containing	4809	20	6.3088e-160	0.6995
A_000566	nhl repeat-containing	4690	20	6.13476e-160	0.6995
A_000567	nhl repeat-containing	4399	20	5.74726e-160	0.6995
A_000568	nhl repeat-containing	4280	20	5.5723e-160	0.6995
A_000569	isoform f	2350	20	0	0.639
A_000570	isoform g	2305	20	0	0.6365
A_000571	isoform f	2227	20	0	0.679
A_000572	isoform g	2182	20	0	0.6775
A_000573	viral a-type inclusion protein	1906	17	1.65231e-06	0.411765
A_000574	viral a-type inclusion protein	1845	13	1.5962e-06	0.416154
A_000575	viral a-type inclusion protein	1852	17	7.19549e-07	0.421765
A_000576	viral a-type inclusion protein	1791	16	6.8906e-07	0.423125
A_000577	electron-transferring-flavoprotein dehydrogenase	2180	20	0	0.8255
A_000578	electron-transferring-flavoprotein dehydrogenase	1958	20	0	0.823
A_000579	exocyst complex component 3	833	20	6.1862e-42	0.6405
A_000580	electron-transferring-flavoprotein dehydrogenase	611	20	2.90663e-43	0.9025
A_000581	aurora kinase a	1378	20	6.51603e-36	0.5345
A_000582	aurora kinase a	1366	20	4.59991e-42	0.62
A_000583	aurora kinase a	1012	20	2.44159e-36	0.5535
A_000584	aurora kinase a	1000	20	1.71044e-42	0.562
A_000585	actin	1329	20	0	0.992
A_000586	actin	1318	20	0	0.992
A_000587	actin	1306	20	0	0.992
A_000588	actin	1295	20	0	0.992
A_000589	---NA---	924	0
A_000590	---NA---	886	0
A_000591	---NA---	777	0
A_000592	---NA---	739	0
A_000593	---NA---	774	0
A_000594	---NA---	771	0
A_000595	---NA---	536	0
A_000596	---NA---	533	0
A_000597	---NA---	1134	0
A_000598	---NA---	1118	0
A_000599	---NA---	944	0
A_000600	---NA---	928	0
A_000601	novel protein	1085	20	1.05409e-72	0.645
A_000602	novel protein	980	20	1.53602e-56	0.7495
A_000603	novel protein	800	20	1.25813e-73	0.644
A_000604	novel protein	695	20	1.62011e-57	0.747
A_000605	---NA---	592	0
A_000606	---NA---	502	0
A_000607	---NA---	950	0
A_000608	---NA---	609	0
A_000609	---NA---	1014	0
A_000610	---NA---	930	0
A_000611	---NA---	875	0
A_000612	---NA---	791	0
A_000613	---NA---	1397	0
A_000614	---NA---	918	0
A_000615	---NA---	822	0
A_000616	---NA---	343	0
A_000617	ribosomal protein l12	691	20	2.77038e-65	0.885
A_000618	ribosomal protein l12	659	20	6.9127e-60	0.7815
A_000619	ribosomal protein l12	646	20	1.59488e-61	0.824
A_000620	ribosomal protein l12	614	20	3.96532e-56	0.727
A_000621	---NA---	812	0
A_000622	---NA---	703	0
A_000623	---NA---	600	0
A_000624	---NA---	491	0
A_000625	---NA---	730	0
A_000626	---NA---	721	0
A_000627	---NA---	475	0
A_000628	---NA---	466	0
A_000629	---NA---	607	0
A_000630	serine threonine-protein kinase grp	607	20	8.97046e-21	0.7345
A_000631	---NA---	392	0
A_000632	serine threonine-protein kinase grp	392	20	6.66414e-21	0.7665
A_000633	hypothetical protein BRAFLDRAFT_92054 [Branchiostoma floridae]	690	1	0.000208818	0.47
A_000634	---NA---	573	0
A_000635	hypothetical protein BRAFLDRAFT_92054 [Branchiostoma floridae]	428	2	6.80126e-05	0.455
A_000636	---NA---	311	0
A_000637		5487	1	0	1
A_000638		3955	1	0	1
A_000639	myosin light chain smooth muscle	3309	20	0	0.552
A_000640	tripartite motif-containing protein 71	4940	20	0	0.699
A_000641	tripartite motif-containing protein 71	3479	20	0	0.688
A_000642	wd repeat-containing protein mio-b	2795	20	0	0.607
A_000643	rolling pebbles	6956	20	0	0.665
A_000644	ribosomal protein l28	1497	20	3.06009e-34	0.6975
A_000645	rolling pebbles	811	20	1.00944e-17	0.803
A_000646	huwe1 protein	2666	20	0	0.8935
A_000647	huwe1 protein	2504	20	0	0.8935
A_000648	atp-binding cassette sub-family f member 1	2133	20	0	0.8965
A_000649	ornithine decarboxylase antizyme	2606	20	4.98633e-28	0.6755
A_000650	ornithine decarboxylase antizyme	2012	20	6.25371e-28	0.675
A_000651	ornithine decarboxylase antizyme	1972	20	3.57532e-28	0.675
A_000652	---NA---	2339	0
A_000653	---NA---	2338	0
A_000654	---NA---	2033	0
A_000655	serine incorporator 1	2807	20	3.74825e-146	0.715
A_000656	membrane protein tms1	1978	20	1.00217e-54	0.644
A_000657	membrane protein tms1d	1775	20	4.2096e-49	0.739
A_000658	endonuclease reverse transcriptase	2794	20	2.8924e-85	0.5465
A_000659	endonuclease-reverse transcriptase	2395	20	2.41865e-85	0.554
A_000660	PREDICTED: similar to predicted protein [Hydra magnipapillata]	600	1	0.00043449	0.59
A_000661	---NA---	2173	0
A_000662	---NA---	1423	0
A_000663	---NA---	1246	0
A_000664	---NA---	1807	0
A_000665	---NA---	1739	0
A_000666	---NA---	1265	0
A_000667	adenylate cyclase-associated protein 1	1707	20	9.58041e-101	0.6745
A_000668	adenylate cyclase-associated protein 1	1654	20	2.83934e-94	0.726
A_000669	adenylyl cyclase-associated protein	1118	20	7.88137e-41	0.7935
A_000670	scavenger receptor acting in neural tissue and majority of rhodopsin is isoform a	2655	20	4.45023e-133	0.559
A_000671	protein croquemort	1490	20	2.28789e-114	0.551
A_000672	scavenger receptor class b member 1	711	20	4.57213e-26	0.6075
A_000673	---NA---	1971	0
A_000674	---NA---	1543	0
A_000675	---NA---	1300	0
A_000676	---NA---	1579	0
A_000677	---NA---	1370	0
A_000678	---NA---	1318	0
A_000679	---NA---	1844	0
A_000680	---NA---	1819	0
A_000681	---NA---	585	0
A_000682	---NA---	1390	0
A_000683	---NA---	1293	0
A_000684	---NA---	817	0
A_000685	---NA---	2986	0
A_000686	---NA---	610	0
A_000687	---NA---	544	0
A_000688	---NA---	1170	0
A_000689	---NA---	1395	0
A_000690	---NA---	1083	0
A_000691	---NA---	1335	0
A_000692	---NA---	983	0
A_000693	---NA---	994	0
A_000694	---NA---	1510	0
A_000695	---NA---	670	0
A_000696	---NA---	785	0
A_000697	---NA---	1012	0
A_000698	---NA---	1013	0
A_000699	---NA---	751	0
A_000700	---NA---	1301	0
A_000701	---NA---	889	0
A_000702	---NA---	839	0
A_000703	cd63 antigen	990	20	4.41106e-59	0.535
A_000704	cd63 antigen	1008	20	2.94898e-58	0.523
A_000705	cd63 antigen	910	20	1.11417e-58	0.525
A_000706	serine proteinase inhibitor	906	18	5.38543e-13	0.497778
A_000707	serine proteinase inhibitor	840	19	4.71881e-13	0.553684
A_000708	serpin-like protein	604	20	1.97444e-12	0.5075
A_000709	---NA---	1142	0
A_000710	---NA---	972	0
A_000711	---NA---	493	0
A_000712	microtubule-associated protein homolog	1040	20	2.99288e-29	0.463
A_000713	vasa-like protein	549	20	4.9474e-12	0.813
A_000714	---NA---	200	0
A_000715	prostaglandin e synthase 2	983	20	2.26582e-41	0.655
A_000716	prostaglandin e synthase 2	784	20	2.11891e-25	0.7475
A_000717	---NA---	380	0
A_000718	---NA---	984	0
A_000719	---NA---	828	0
A_000720	---NA---	584	0
A_000721		930
A_000722		927
A_000723		532
A_000724	---NA---	817	0
A_000725	---NA---	698	0
A_000726	---NA---	668	0
A_000727	---NA---	594	0
A_000728	---NA---	401	0
A_000729	---NA---	606	0
A_000730	---NA---	572	0
A_000731	---NA---	465	0
A_000732	---NA---	771	0
A_000733	---NA---	541	0
A_000734	partial	337	6	1.06886e-10	0.771667
A_000735	---NA---	541	0
A_000736	---NA---	532	0
A_000737	---NA---	525	0
A_000738	e3 ubiquitin	594	20	5.44422e-44	0.9205
A_000739	e3 ubiquitin-protein ligase ubr2	512	20	2.89714e-51	0.6665
A_000740	mkiaa1301 protein	464	20	1.8637e-18	0.947
A_000741	---NA---	773	0
A_000742	---NA---	394	0
A_000743	---NA---	362	0
A_000744	---NA---	542	0
A_000745	---NA---	491	0
A_000746	---NA---	460	0
A_000747	---NA---	638	0
A_000748	---NA---	510	0
A_000749	---NA---	352	0
A_000750	cg32030 cg32030-pa	599	3	0.000327785	0.616667
A_000751	---NA---	361	0
A_000752	---NA---	383	0
A_000753	---NA---	590	0
A_000754	---NA---	408	0
A_000755	---NA---	284	0
A_000756	---NA---	411	0
A_000757	---NA---	353	0
A_000758	---NA---	204	0
A_000759	---NA---	156	0
A_000760	---NA---	125	0
A_000761	---NA---	60	0
A_000762	---NA---	386	0
A_000763	actin	1679	20	0	0.9305
A_000764	actin	1676	20	0	0.9305
A_000765	actin	1641	20	0	0.9305
A_000766	actin	1638	20	0	0.9305
A_000767	isoform k	1348	20	9.2297e-19	0.4815
A_000768	isoform k	1316	18	8.06749e-12	0.502222
A_000769	isoform k	912	20	5.09026e-19	0.4815
A_000770	isoform k	880	20	4.30885e-12	0.512
A_000771	ribosomal protein s25	569	20	2.16782e-28	0.874
A_000772	ribosomal protein	510	20	2.15855e-30	0.765
A_000773	ribosomal protein s25	451	20	1.27039e-27	0.8815
A_000774	ribosomal protein	392	20	2.06681e-30	0.7685
A_000775	a-agglutinin attachment subunit precursor	7531	1	0.000706574	0.39
A_000776	a-agglutinin attachment subunit precursor	7118	1	0.000665152	0.39
A_000777	---NA---	971	0
A_000778	long form	3862	20	0	0.753
A_000779	long form	3854	20	0	0.753
A_000780	---NA---	2529	0
A_000781	---NA---	2500	0
A_000782	---NA---	1206	0
A_000783	myosin light chain smooth muscle	2919	20	3.01567e-138	0.7165
A_000784	cytochrome c oxidase subunit 1	1632	20	1.31938e-09	0.9225
A_000785	myosin light chain smooth muscle	1544	20	4.76332e-147	0.717
A_000786	y box binding	2085	20	2.75278e-26	0.915
A_000787	y box binding	1933	20	2.49706e-26	0.915
A_000788	y box binding	1879	20	2.4068e-26	0.915
A_000789	trna methyltransferase	2242	20	3.17706e-93	0.6325
A_000790	hypothetical protein BRAFLDRAFT_88535 [Branchiostoma floridae]	1276	1	3.96137e-08	0.42
A_000791	trna methyltransferase	1404	20	4.52158e-132	0.665
A_000792	tubulin alpha-1 chain	2489	20	0	0.9875
A_000793	tubulin alpha-1 chain	1530	20	0	0.9875
A_000794	tubulin alpha-1 chain	1529	20	0	0.9875
A_000795	protein	2142	20	6.68577e-52	0.4775
A_000796	protein	1396	20	1.47234e-51	0.473
A_000797	---NA---	1271	0
A_000798	arginine kinase	1981	20	3.62687e-159	0.9185
A_000799	arginine kinase	1464	20	7.17856e-159	0.9285
A_000800	chromosome segregation atpase-like protein	804	20	5.11825e-06	0.4755
A_000801	proteophosphoglycan ppg4	1557	20	9.47076e-10	0.361
A_000802	hypothetical protein SORBIDRAFT_04g010730 [Sorghum bicolor]	934	2	7.35765e-05	0.365
A_000803	---NA---	452	0
A_000804	---NA---	1001	0
A_000805	---NA---	925	0
A_000806	---NA---	933	0
A_000807	alpha skeletal muscle	1110	20	0	0.959
A_000808	actin 1	901	20	2.26891e-155	0.9645
A_000809	---NA---	1510	0
A_000810	---NA---	608	0
A_000811	---NA---	335	0
A_000812	blastoderm specific protein	1271	20	1.38285e-45	0.588
A_000813	nuclear isoform d	1238	20	4.72583e-43	0.6
A_000814	nuclear isoform d	388	20	1.22225e-14	0.7145
A_000815	---NA---	1077	0
A_000816	---NA---	917	0
A_000817	---NA---	431	0
A_000818	---NA---	1150	0
A_000819	---NA---	1071	0
A_000820	---NA---	561	0
A_000821	---NA---	1161	0
A_000822	---NA---	1008	0
A_000823	---NA---	540	0
A_000824	protein kinase family member (kin-25)	1861	2	0.000749349	0.43
A_000825	---NA---	474	0
A_000826	---NA---	280	0
A_000827	uncharacterized protein	789	6	1.65602e-09	0.666667
A_000828	uncharacterized protein	760	6	1.52562e-09	0.666667
A_000829	uncharacterized protein	689	6	1.25075e-09	0.666667
A_000830	---NA---	781	0
A_000831	---NA---	772	0
A_000832	---NA---	763	0
A_000833	protease inhibitor epi11	785	14	1.42789e-05	0.6
A_000834	kazal-type proteinase inhibitor	750	17	1.30224e-05	0.603529
A_000835	---NA---	345	0
A_000836	---NA---	511	0
A_000837	---NA---	497	0
A_000838	---NA---	430	0
A_000839	---NA---	682	0
A_000840	zinc finger	678	12	1.25345e-06	0.5225
A_000841	---NA---	431	0
A_000842	---NA---	583	0
A_000843	---NA---	295	0
A_000844	---NA---	108	0
A_000845	---NA---	666	0
A_000846	---NA---	558	0
A_000847	---NA---	470	0
A_000848	---NA---	546	0
A_000849	---NA---	538	0
A_000850	---NA---	526	0
A_000851	isoform d	664	18	1.18533e-06	0.596111
A_000852	isoform d	570	20	8.15417e-07	0.5995
A_000853	---NA---	296	0
A_000854	splicing factor yt521-b	494	20	2.72557e-38	0.815
A_000855	yth domain-containing protein 1	457	20	4.34832e-12	0.829
A_000856	---NA---	417	0
A_000857	---NA---	587	0
A_000858	regulator of telomere elongation helicase 1 rtel1	449	20	2.80293e-46	0.7335
A_000859	---NA---	355	0
A_000860	---NA---	625	0
A_000861	---NA---	265	0
A_000862	---NA---	124	0
A_000863	---NA---	382	0
A_000864	---NA---	359	0
A_000865	---NA---	320	0
A_000866	---NA---	394	0
A_000867	---NA---	341	0
A_000868	---NA---	290	0
A_000869	---NA---	379	0
A_000870	---NA---	371	0
A_000871	---NA---	266	0
A_000872	ryanodine receptor	2821	20	0	0.8335
A_000873	ryanodine receptor	2731	20	0	0.8305
A_000874	14-3-3 zeta	2811	20	9.93491e-131	0.947
A_000875	14-3-3 zeta	2811	20	1.34274e-127	0.945
A_000876	heat shock protein 90	2553	20	0	0.941
A_000877	heat shock protein 90	2553	20	0	0.941
A_000878	---NA---	1965	0
A_000879	---NA---	1964	0
A_000880	glutamate dehydrogenase	2151	20	0	0.911
A_000881	glutamate dehydrogenase	2143	20	0	0.909
A_000882	cytoplasmic dynein 1 intermediate chain 2-like	1490	20	9.03867e-95	0.69
A_000883	cytoplasmic dynein 1 intermediate chain 2	1442	20	4.57548e-96	0.6435
A_000884	PREDICTED: hypothetical protein LOC100165413 [Acyrthosiphon pisum]	1663	20	6.73341e-40	0.527
A_000885	PREDICTED: hypothetical protein LOC100165413 [Acyrthosiphon pisum]	1662	20	1.14314e-39	0.53
A_000886	---NA---	1983	0
A_000887	---NA---	1963	0
A_000888	---NA---	1850	0
A_000889	---NA---	1822	0
A_000890	---NA---	1370	0
A_000891	---NA---	1349	0
A_000892	leucine-rich repeat-containing protein 20	1631	20	1.53316e-58	0.764
A_000893	leucine-rich repeat-containing protein 20	1597	20	1.49089e-58	0.764
A_000894	cathepsin f-like cysteine protease	1600	20	8.0511e-121	0.752
A_000895	cysteine proteinase cg12163	1601	20	8.33158e-118	0.74
A_000896	---NA---	1092	0
A_000897	---NA---	1173	0
A_000898	---NA---	1354	0
A_000899	---NA---	1351	0
A_000900	---NA---	1247	0
A_000901	---NA---	1214	0
A_000902	hypothetical protein TRIADDRAFT_8984 [Trichoplax adhaerens]	2516	1	4.35221e-05	0.52
A_000903	---NA---	1065	0
A_000904	---NA---	1060	0
A_000905	immunity adhesion receptor cd209l2	1200	20	5.41932e-20	0.52
A_000906	immunity adhesion receptor cd209l2	1193	20	5.35654e-20	0.52
A_000907	---NA---	1086	0
A_000908	---NA---	1086	0
A_000909	low density lipoprotein receptor adaptor protein 1	1087	20	1.94769e-42	0.6815
A_000910	low density lipoprotein receptor adaptor protein 1	1065	20	2.71971e-30	0.632
A_000911	---NA---	2070	0
A_000912	phosphoglucose isomerase	2115	20	0	0.87
A_000913	---NA---	958	0
A_000914	---NA---	942	0
A_000915	isoform b	790	20	8.6596e-59	0.551
A_000916	isoform a	779	20	2.36353e-53	0.534
A_000917	---NA---	1622	0
A_000918	dosage compensation regulatory complex	1652	20	1.41352e-61	0.785
A_000919	---NA---	800	0
A_000920	---NA---	799	0
A_000921	---NA---	743	0
A_000922	---NA---	743	0
A_000923	---NA---	761	0
A_000924	---NA---	750	0
A_000925	---NA---	730	0
A_000926	---NA---	723	0
A_000927	---NA---	708	0
A_000928	---NA---	708	0
A_000929	---NA---	653	0
A_000930	---NA---	647	0
A_000931	hypothetical protein Bm1_11025 [Brugia malayi]	533	20	3.79524e-28	0.7845
A_000932	hypothetical protein Bm1_11025 [Brugia malayi]	498	20	3.20025e-28	0.7845
A_000933	at rich interactive domain 1a (swi1 like)	1283	20	1.77421e-40	0.5065
A_000934	---NA---	645	0
A_000935	---NA---	625	0
A_000936	---NA---	631	0
A_000937	---NA---	564	0
A_000938	---NA---	563	0
A_000939	---NA---	568	0
A_000940	wd repeat domain phosphoinositide-interacting protein 2	553	20	2.67711e-47	0.9485
A_000941	wd repeat domain phosphoinositide-interacting protein 2-like	528	20	9.99959e-48	0.8355
A_000942	---NA---	1066	0
A_000943	isoform a	499	20	6.4725e-16	0.5985
A_000944	isoform a	487	20	2.1896e-19	0.624
A_000945	---NA---	473	0
A_000946	---NA---	473	0
A_000947	---NA---	480	0
A_000948	---NA---	469	0
A_000949	---NA---	909	0
A_000950	---NA---	844	0
A_000951	---NA---	767	0
A_000952	---NA---	519	0
A_000953	---NA---	486	0
A_000954	fun14 domain-containing protein 1	530	20	1.27378e-18	0.673
A_000955	---NA---	398	0
A_000956	hypothetical protein EAG_03557 [Camponotus floridanus]	554	5	1.27608e-14	0.64
A_000957	hypothetical protein EAG_03557 [Camponotus floridanus]	462	5	7.84829e-09	0.596
A_000958	hypothetical protein EAG_03557 [Camponotus floridanus]	418	6	1.02445e-16	0.63
A_000959	ac1147-like protein	347	20	3.06838e-21	0.7905
A_000960	ac1147-like protein	213	20	5.10592e-21	0.8045
A_000961	---NA---	58	0
A_000962		7304	1	0	1
A_000963		7215
A_000964	headcase protein	7482	20	2.44442e-73	0.7605
A_000965	headcase protein	6346	20	2.06021e-73	0.7605
A_000966	na+ k+ atpase alpha subunit	5838	20	0	0.9395
A_000967	na+ k+ atpase alpha subunit	4724	20	0	0.9395
A_000968	myosin heavy nonmuscle or smooth muscle	5609	20	0	0.8055
A_000969	myosin heavy nonmuscle or smooth muscle	2201	20	2.48627e-09	0.8495
A_000970	sodium-calcium exchanger	4831	20	6.18391e-125	0.6875
A_000971	---NA---	1908	0
A_000972	pdz and lim domain protein 3	3326	8	3.50608e-05	0.4425
A_000973	---NA---	3138	0
A_000974	isoform c	3827	20	0	0.8495
A_000975	isoform c	2582	20	0	0.861
A_000976	set and mynd domain-containing protein 3	3291	20	1.86248e-75	0.515
A_000977	set and mynd domain-containing protein 3	2962	20	2.82585e-75	0.513
A_000978	calpain b	3107	20	0	0.7745
A_000979	calpain b	3087	20	0	0.781
A_000980		5283	1	0	1
A_000981	---NA---	590	0
A_000982	high density lipoprotein binding protein	4917	20	0	0.753
A_000983	---NA---	573	0
A_000984	10-formyltetrahydrofolate dehydrogenase	3667	20	0	0.818
A_000985	10-formyltetrahydrofolate dehydrogenase	1671	20	0	0.787
A_000986	uncharacterized protein c6orf168	2731	20	2.16738e-82	0.713
A_000987	failed axon connections protein	2328	20	8.66874e-58	0.6925
A_000988	integrin beta subunit	3088	20	0	0.712
A_000989	---NA---	1973	0
A_000990	zinc finger protein	2398	20	6.22059e-53	0.65
A_000991	zinc finger protein	2277	20	1.28313e-49	0.6845
A_000992	centromeric protein	4333	20	5.38826e-94	0.534
A_000993	centromeric protein	569	3	1.07099e-06	0.603333
A_000994	---NA---	2528	0
A_000995	---NA---	2097	0
A_000996	isoform b	3622	20	5.86306e-46	0.8165
A_000997	---NA---	930	0
A_000998	transferrin	3121	20	4.99336e-147	0.5125
A_000999	transferrin	754	20	8.43628e-37	0.524
A_001000	---NA---	2827	0
A_001001	---NA---	1764	0
A_001002	farnesyl pyrophosphate synthetase	1856	20	7.76691e-79	0.7675
A_001003	farnesyl pyrophosphate synthetase	1529	20	6.03852e-79	0.7675
A_001004	ribosome-binding protein 1	2862	20	2.34106e-10	0.5205
A_001005	ribosome-binding protein 1	1212	20	5.69472e-17	0.44
A_001006	---NA---	1947	0
A_001007	---NA---	968	0
A_001008	isoform c	2099	20	2.33117e-25	0.513
A_001009	---NA---	1493	0
A_001010	glycine dehydrogenase	2207	20	2.78893e-85	0.8575
A_001011	---NA---	1730	0
A_001012	nucleosome assembly protein 1-like 1	2195	20	3.06254e-84	0.728
A_001013	nucleosome assembly protein 1-like 1	2059	20	3.9809e-78	0.744
A_001014	isoform i	4011	20	0	0.839
A_001015	cg4523	2088	20	7.76736e-67	0.619
A_001016	cg4523	2073	20	7.69715e-67	0.619
A_001017	pyruvate kinase	2193	20	0	0.848
A_001018	pyruvate kinase	1616	20	0	0.848
A_001019	actin-interacting protein 1	2076	20	8.77301e-113	0.7775
A_001020	actin-interacting protein 1	1447	20	5.53944e-113	0.7775
A_001021	protein shroom	2063	20	7.08911e-51	0.6835
A_001022	protein shroom	2014	20	6.87945e-51	0.6835
A_001023	sarco endoplasmic reticulum ca2+-atpase	3605	20	0	0.9105
A_001024	eukaryotic translation initiation factor 5	2717	20	3.96972e-44	0.7275
A_001025	eukaryotic translation initiation factor 5	1251	20	1.49627e-44	0.7275
A_001026	collagen alpha-1 chain	3022	20	2.63675e-28	0.54
A_001027	---NA---	957	0
A_001028	ankyrin repeat domain-containing protein 17	2376	20	1.29695e-144	0.682
A_001029	ankyrin repeat domain-containing protein 17	1411	20	7.12107e-78	0.6375
A_001030	limkain b1	2406	20	1.22772e-41	0.4965
A_001031	---NA---	1335	0
A_001032	medium polypeptide	1833	13	2.98467e-05	0.562308
A_001033	bifunctional inhibitor lipid transfer protein seed storage protein	1526	20	4.99776e-40	0.419
A_001034	protein tyrosine phosphatase type iva 1	2745	20	5.32405e-66	0.8325
A_001035	---NA---	889	0
A_001036	glycogenin-1 isoform 1	1694	20	2.03217e-60	0.575
A_001037	glycogenin-1	1634	20	1.32551e-58	0.5595
A_001038	serine threonine-protein kinase grp	2457	20	3.43642e-148	0.6805
A_001039	ribosome-binding factor mitochondrial-like	1103	20	1.34519e-14	0.6155
A_001040	sterol regulatory element-binding protein 1	1783	20	2.52965e-102	0.5725
A_001041	sterol regulatory element-binding protein 1	1664	20	1.71777e-105	0.572
A_001042	spingomyelin synthetase	1976	20	5.85026e-63	0.7555
A_001043	spingomyelin synthetase	1366	20	3.61946e-63	0.7555
A_001044	cyclic amp-dependent transcription factor atf-4	1349	1	4.31991e-05	0.69
A_001045	cyclic amp-dependent transcription factor atf-4	1348	1	4.32036e-05	0.69
A_001046	---NA---	1603	0
A_001047	---NA---	677	0
A_001048	dead (asp-glu-ala-asp) box polypeptide 3	1367	20	2.56397e-101	0.7415
A_001049	dead (asp-glu-ala-asp) box polypeptide 3	1329	20	1.3641e-99	0.867
A_001050	periaxin-like protein	2030	13	1.26305e-09	0.432308
A_001051	isoform cra_a	1256	20	3.26298e-15	0.474
A_001052	serine proteinase stubble	2001	20	7.68535e-103	0.4895
A_001053	serine proteinase stubble	1457	20	5.12195e-103	0.4895
A_001054	polymerase (dna-directed) delta interacting protein 3	1722	20	1.35736e-20	0.4355
A_001055	polymerase (dna-directed) delta interacting protein 3	1662	20	9.98293e-21	0.441
A_001056	staphylococcal nuclease domain containing 1	2191	20	2.65975e-104	0.7905
A_001057	staphylococcal nuclease domain containing 1	995	20	5.91012e-104	0.792
A_001058	adducin	1716	20	0	0.776
A_001059	protein hu-li tai shao	1635	20	2.30123e-171	0.776
A_001060	---NA---	1889	0
A_001061	---NA---	878	0
A_001062	---NA---	1645	0
A_001063	---NA---	1615	0
A_001064	extended synaptotagmin-2	2834	20	7.64311e-30	0.549
A_001065	ac1147-like protein	413	20	6.70864e-13	0.944
A_001066	fructose -bisphosphate aldolase	1634	20	2.16352e-145	0.811
A_001067	fructose -bisphosphate aldolase	1602	20	2.10943e-145	0.811
A_001068	---NA---	1743	0
A_001069	cell wall surface anchor family protein	1353	2	0.000490816	0.445
A_001070	---NA---	1660	0
A_001071	---NA---	1543	0
A_001072	ornithine decarboxylase	2297	20	5.45165e-132	0.7085
A_001073	ornithine decarboxylase	361	20	1.45001e-07	0.815
A_001074	spliceosome rna helicase bat1	1791	20	0	0.954
A_001075	atp-dependent rna helicase	1322	20	7.17763e-93	0.923
A_001076	---NA---	1488	0
A_001077	---NA---	1262	0
A_001078	---NA---	2368	0
A_001079	tumor protein p53-inducible nuclear protein 1-like	738	20	1.4544e-09	0.6675
A_001080	haloalkane dehalogenase	1572	20	1.07786e-69	0.5945
A_001081	haloalkane dehalogenase	1524	20	1.03247e-69	0.5945
A_001082	---NA---	2447	0
A_001083	---NA---	357	0
A_001084	set and mynd domain-containing protein 4-like	2333	20	2.81492e-36	0.432
A_001085	set and mynd domain-containing protein	709	20	3.60388e-07	0.4565
A_001086	mitochondrial ribosomal protein	1562	20	1.65688e-46	0.4935
A_001087	mitochondrial ribosomal protein	1470	20	2.00712e-46	0.4935
A_001088	l-lactate dehydrogenase	1729	20	9.18461e-118	0.835
A_001089	l-lactate dehydrogenase	865	20	5.1301e-103	0.866
A_001090	cell division cycle and apoptosis regulator protein 1	1552	20	5.31205e-29	0.8815
A_001091	---NA---	1427	0
A_001092	vesicle-associated membrane protein 7	1504	20	3.17716e-39	0.7965
A_001093	vesicle-associated membrane protein 7	1469	20	3.50819e-67	0.81
A_001094	protein bicaudal c homolog 1	2463	20	3.02106e-27	0.467
A_001095	---NA---	509	0
A_001096	---NA---	1482	0
A_001097	---NA---	1446	0
A_001098	thrombospondin 4	1461	20	3.33163e-110	0.85
A_001099	thrombospondin 4	1452	20	4.28339e-134	0.869
A_001100	reticulon nogo	1464	20	1.62491e-64	0.795
A_001101	isoform a	1428	20	1.67957e-58	0.795
A_001102	---NA---	1084	0
A_001103	myosin heavy chain	672	20	3.01325e-13	0.8
A_001104	protein nap	1808	20	6.37125e-85	0.7085
A_001105	---NA---	1009	0
A_001106	dna photolyase	1448	20	8.20014e-61	0.713
A_001107	dna photolyase	1320	20	7.24453e-61	0.713
A_001108	eukaryotic translation initiation factor 3 subunit d	1912	20	0	0.7885
A_001109	eukaryotic translation initiation factor 3 subunit d	958	20	1.97524e-93	0.726
A_001110	rer1 protein	1765	20	6.64464e-63	0.7805
A_001111	---NA---	717	0
A_001112	acyl- dehydrogenase	1424	20	2.51659e-139	0.77
A_001113	acyl- dehydrogenase	1374	20	2.39495e-139	0.77
A_001114	---NA---	1638	0
A_001115	---NA---	1136	0
A_001116	tar-binding protein	1423	20	2.80185e-114	0.806
A_001117	tar-binding protein	1351	20	2.27129e-118	0.878
A_001118	---NA---	1441	0
A_001119	---NA---	1329	0
A_001120	obg-like atpase 1	1498	20	1.99876e-143	0.836
A_001121	obg-like atpase 1	968	20	6.3873e-43	0.792
A_001122	atp synthase alpha subunit vacuolar	1373	20	1.00534e-129	0.941
A_001123	atp synthase alpha subunit vacuolar	1366	20	2.82824e-108	0.9185
A_001124	male reproductive-related protein b	2031	4	4.35826e-53	0.9875
A_001125	male reproductive-related protein b	696	4	8.4073e-54	0.9875
A_001126	tumor protein d54	1403	20	1.1396e-35	0.62
A_001127	tumor protein d54	1321	20	1.05586e-27	0.6305
A_001128	kinesin-like protein klp10a	1987	20	0	0.7795
A_001129	kif2a partial	726	20	5.68934e-12	0.794
A_001130	eukaryotic translation initiation factor 4b	1376	20	2.31022e-33	0.6405
A_001131	eukaryotic translation initiation factor 4b	1330	20	2.21861e-33	0.6405
A_001132	small ubiquitin-related modifier precursor	1848	20	5.62366e-44	0.894
A_001133	small ubiquitin-related modifier precursor	861	20	1.84212e-44	0.894
A_001134	---NA---	1187	0
A_001135	hypothetical protein DAPPUDRAFT_268735 [Daphnia pulex]	1164	1	0.000397557	0.49
A_001136	atp synthase	2224	20	0	0.9225
A_001137	dna topoisomerase 2-alpha	400	20	1.97063e-36	0.853
A_001138	hypothetical protein HPODL_0414 [Pichia angusta DL-1]	1412	1	0.00068057	0.42
A_001139	type a von willebrand factor domain-containing protein	1196	2	0.000540247	0.425
A_001140	mitochondrial import inner membrane translocase subunit tim23	1384	20	3.13023e-54	0.7445
A_001141	mitochondrial import inner membrane translocase subunit tim23	1230	20	2.65128e-54	0.7445
A_001142	alcohol dehydrogenase	1027	20	1.28716e-109	0.787
A_001143	alcohol dehydrogenase class-3	941	20	3.15461e-88	0.7795
A_001144	e3 ubiquitin-protein ligase trim33	1390	20	4.83138e-55	0.613
A_001145	e3 ubiquitin-protein ligase trim33	1179	20	1.18427e-53	0.663
A_001146	tryptophanyl-trna isoform cra_a	1390	20	1.49776e-138	0.853
A_001147	secretory carrier membrane protein 1	701	20	1.01271e-22	0.834
A_001148	prohibitin protein wph	1421	20	1.22542e-106	0.9075
A_001149	prohibitin protein wph	1140	20	2.37068e-62	0.9065
A_001150	loc496093 protein	1704	20	1.44247e-107	0.6295
A_001151	loc496093 protein	838	20	5.50956e-30	0.57
A_001152	---NA---	1639	0
A_001153	phospholipase c	740	1	2.56725e-06	0.56
A_001154	protein phosphatase pp2a regulatory subunit b	2086	20	0	0.9335
A_001155	---NA---	456	0
A_001156	---NA---	2030	0
A_001157	presenilins-associated rhomboid-like mitochondrial-like isoform 2	426	20	5.5509e-15	0.6915
A_001158	predicted protein [Nematostella vectensis]	1232	1	1.57611e-06	0.49
A_001159	predicted protein [Nematostella vectensis]	1203	1	1.38988e-07	0.43
A_001160	receptor-type tyrosine-protein phosphatase gamma	1877	9	2.33714e-05	0.43
A_001161	---NA---	547	0
A_001162	---NA---	1276	0
A_001163	---NA---	1152	0
A_001164	ribosomal protein l3	1239	20	0	0.8665
A_001165	ribosomal protein l3	1175	20	5.61177e-123	0.86
A_001166	---NA---	1715	0
A_001167	---NA---	689	0
A_001168	metastasis-associated protein 3	1915	20	1.39435e-37	0.79
A_001169	metastasis-associated protein mta1	458	20	4.59222e-54	0.7405
A_001170	zinc finger	1814	20	7.15168e-93	0.7545
A_001171	---NA---	557	0
A_001172	---NA---	1279	0
A_001173	---NA---	1066	0
A_001174	---NA---	1756	0
A_001175	---NA---	547	0
A_001176	---NA---	1456	0
A_001177	---NA---	840	0
A_001178	ubiquitin-conjugating enzyme e2 s	1329	20	5.05576e-70	0.7955
A_001179	---NA---	958	0
A_001180	---NA---	1528	0
A_001181	---NA---	755	0
A_001182	bifunctional protein ncoat	1297	20	1.28482e-62	0.585
A_001183	phosphatidylinositol 4-kinase beta	992	20	4.76778e-21	0.7315
A_001184	endonuclease-reverse transcriptase -e01	1151	2	3.52296e-05	0.55
A_001185	endonuclease-reverse transcriptase	467	2	2.77906e-06	0.545
A_001186	sb:cb283 protein	1087	20	1.5786e-76	0.8135
A_001187	sb:cb283 protein	1050	20	1.95027e-76	0.8155
A_001188	oncoprotein nm23	1514	20	5.05607e-77	0.8715
A_001189	oncoprotein nm23	748	20	1.65103e-77	0.8715
A_001190	---NA---	1394	0
A_001191	---NA---	803	0
A_001192	---NA---	1160	0
A_001193	---NA---	1062	0
A_001194	e3 ubiquitin-protein ligase march6	1280	20	2.7087e-65	0.621
A_001195	e3 ubiquitin-protein ligase march6	649	20	5.24153e-28	0.6695
A_001196	rna-binding protein cabeza	1548	20	5.29781e-29	0.797
A_001197	structural maintenance of chromosomes protein 1a	642	20	1.44489e-14	0.7575
A_001198	protein lsm14 homolog a	1425	20	7.81464e-40	0.746
A_001199	protein lsm14 homolog a	758	20	1.22879e-35	0.765
A_001200	spastic paraplegia 21 (autosomal mast syndrome)	1710	20	3.81393e-108	0.792
A_001201	---NA---	371	0
A_001202	---NA---	1007	0
A_001203	---NA---	976	0
A_001204	ribonuclease h1	1660	20	6.18006e-55	0.631
A_001205	ribonuclease hi	495	20	5.15228e-13	0.7375
A_001206	---NA---	1239	0
A_001207	---NA---	363	0
A_001208	isoform a	1071	20	5.14866e-64	0.765
A_001209	isoform a	1071	20	5.14866e-64	0.7575
A_001210	---NA---	1078	0
A_001211	---NA---	1058	0
A_001212	---NA---	1010	0
A_001213	---NA---	942	0
A_001214	inosine-5 -monophosphate dehydrogenase	1496	20	4.11829e-63	0.8895
A_001215	inosine-5 -monophosphate dehydrogenase	637	20	9.00801e-62	0.8775
A_001216	eukaryotic translation initiation factor 3 subunit c	1672	20	2.42684e-86	0.834
A_001217	---NA---	287	0
A_001218	---NA---	1001	0
A_001219	---NA---	960	0
A_001220	polyadenylation factor	1110	20	3.34932e-21	0.4915
A_001221	polyadenylation factor	996	20	1.65582e-21	0.5005
A_001222	thyroid hormone receptor	1568	20	1.98136e-23	0.526
A_001223	---NA---	526	0
A_001224	deoxyribonucleoside 5 -monophosphate n-glycosidase	1360	20	9.23047e-35	0.6625
A_001225	---NA---	740	0
A_001226	---NA---	1122	0
A_001227	---NA---	944	0
A_001228	glycerol-3-phosphate dehydrogenase	1106	20	1.53788e-143	0.8735
A_001229	glycerol-3-phosphate dehydrogenase	978	20	1.08306e-110	0.8815
A_001230	phytanoyl- 2-hydroxylase	1121	20	8.60392e-118	0.721
A_001231	phytanoyl- 2-hydroxylase	955	20	3.03043e-94	0.711
A_001232	---NA---	1155	0
A_001233	---NA---	801	0
A_001234	---NA---	1035	0
A_001235	---NA---	1008	0
A_001236	---NA---	1325	0
A_001237	---NA---	710	0
A_001238	anaphase promoting complex subunit 10	1045	20	5.32186e-34	0.6415
A_001239	anaphase promoting complex subunit 10	980	20	2.59641e-29	0.6015
A_001240	mll1 mll complex subunit kiaa1267-like	1328	16	9.99511e-10	0.5425
A_001241	---NA---	331	0
A_001242	---NA---	954	0
A_001243	---NA---	798	0
A_001244	---NA---	738	0
A_001245	---NA---	697	0
A_001246	---NA---	655	0
A_001247	---NA---	433	0
A_001248	---NA---	1376	0
A_001249	---NA---	628	0
A_001250	---NA---	1018	0
A_001251	---NA---	959	0
A_001252	death-associated protein 1	1071	6	1.98851e-07	0.663333
A_001253	death-associated protein 1	918	6	1.5547e-07	0.663333
A_001254	---NA---	1036	0
A_001255	---NA---	932	0
A_001256	---NA---	989	0
A_001257	---NA---	988	0
A_001258	---NA---	1023	0
A_001259	---NA---	942	0
A_001260	---NA---	535	0
A_001261	---NA---	409	0
A_001262	---NA---	1022	0
A_001263	---NA---	933	0
A_001264	---NA---	1140	0
A_001265	---NA---	801	0
A_001266	---NA---	1013	0
A_001267	---NA---	670	0
A_001268	---NA---	1069	0
A_001269	---NA---	777	0
A_001270	rio kinase 2	937	20	1.62612e-44	0.7965
A_001271	rio kinase 2	838	20	1.34996e-44	0.7965
A_001272	---NA---	1021	0
A_001273	---NA---	857	0
A_001274	---NA---	1399	0
A_001275	---NA---	481	0
A_001276	---NA---	1185	0
A_001277	partial	684	19	8.57058e-11	0.626842
A_001278	---NA---	1169	0
A_001279	---NA---	700	0
A_001280	u4 tri-snrnp-associated protein 3	1228	20	4.56848e-14	0.862
A_001281	---NA---	636	0
A_001282	myosin heavy chain	942	20	1.7218e-09	0.5035
A_001283	myosin heavy chain	916	20	7.41177e-10	0.4825
A_001284	mia3 protein	941	20	8.77202e-14	0.6625
A_001285	mia3 protein	915	20	8.46051e-14	0.6625
A_001286	protein transport protein sec23	1039	20	4.37988e-97	0.74
A_001287	protein transport protein sec23	815	20	7.35249e-101	0.825
A_001288	---NA---	1425	0
A_001289	---NA---	379	0
A_001290	---NA---	1294	0
A_001291	---NA---	470	0
A_001292	---NA---	915	0
A_001293	---NA---	907	0
A_001294	---NA---	1059	0
A_001295	---NA---	760	0
A_001296	---NA---	928	0
A_001297	sarcoplasmic calcium-binding protein 1	868	20	5.66015e-17	0.7605
A_001298	dnaj homolog subfamily b member 6-like	1170	20	3.57478e-53	0.5835
A_001299	golgi-associated plant pathogenesis-related protein 1	589	20	5.14906e-15	0.7395
A_001300	---NA---	881	0
A_001301	---NA---	863	0
A_001302	---NA---	967	0
A_001303	---NA---	777	0
A_001304	paired amphipathic helix protein sin3a	1195	12	3.8627e-10	0.548333
A_001305	vacuolar protein sorting-associated protein 29	553	20	3.9393e-40	0.906
A_001306	---NA---	855	0
A_001307	protein	644	20	6.28202e-10	0.73
A_001308	---NA---	1116	0
A_001309	---NA---	630	0
A_001310	calcium-transporting atpase sarcoplasmic endoplasmic reticulum type (calcium pump)	1229	20	0	0.8745
A_001311	calcium-transporting atpase sarcoplasmic endoplasmic reticulum type	501	20	3.15317e-63	0.9625
A_001312	---NA---	1158	0
A_001313	protein	559	20	1.25294e-09	0.6795
A_001314	---NA---	1374	0
A_001315	---NA---	358	0
A_001316	transcription elongation factor b polypeptide 3	1059	20	7.65765e-12	0.681
A_001317	saps domain member 1	663	20	5.06883e-10	0.6985
A_001318	n- isoform h	887	20	4.95895e-32	0.8835
A_001319	synaptobrevin method: conceptual translation supplied by author	835	20	2.55308e-11	0.893
A_001320	sentrin-specific protease 8	861	20	1.4596e-41	0.5925
A_001321	sentrin-specific protease 8	860	20	1.46674e-41	0.5925
A_001322	and ph domain-containing protein 6-like	820	20	1.57412e-58	0.575
A_001323	and ph domain containing 6	506	20	5.22342e-21	0.552
A_001324	ubiquinone biosynthesis protein	866	20	7.49425e-62	0.822
A_001325	ubiquinone biosynthesis protein	842	20	7.17947e-62	0.822
A_001326	kiaa1872 protein	727	20	4.47876e-32	0.789
A_001327	kiaa1872 protein	668	20	9.74008e-33	0.77
A_001328	---NA---	474	0
A_001329	---NA---	322	0
A_001330	---NA---	1049	0
A_001331	---NA---	644	0
A_001332	---NA---	838	0
A_001333	---NA---	843	0
A_001334	sugar transporter	875	20	4.7739e-39	0.5555
A_001335	sugar transporter	814	20	1.66477e-44	0.572
A_001336	---NA---	992	0
A_001337	---NA---	691	0
A_001338	actin	930	20	3.56239e-148	0.9705
A_001339	actin	738	20	5.951e-111	0.9755
A_001340	elongation factor 1 beta	856	20	5.18171e-39	0.8555
A_001341	elongation factor 1 beta	813	20	7.56013e-45	0.856
A_001342	bscl2 protein	1143	20	2.18334e-15	0.682
A_001343	---NA---	528	0
A_001344	mps one binder kinase activator-like 2-like	845	20	2.0186e-88	0.789
A_001345	mps one binder kinase activator-like 2-like	820	20	3.04371e-86	0.799
A_001346	---NA---	997	0
A_001347	---NA---	638	0
A_001348	cyclophilin a	811	20	8.70076e-70	0.8875
A_001349	cyclophilin a	850	20	3.51541e-64	0.8795
A_001350	piggybac transposase uribo2	957	20	3.55034e-30	0.494
A_001351	ac transposable element-derived protein 4	639	20	1.07421e-14	0.564
A_001352	isoform c	956	20	3.6299e-47	0.622
A_001353	rna (guanine-9-)-methyltransferase domain-containing protein 2	671	20	8.00256e-59	0.704
A_001354	wd-repeat protein	1184	20	0	0.8935
A_001355	wd-repeat protein	437	20	6.21255e-43	0.9775
A_001356	---NA---	443	0
A_001357	---NA---	357	0
A_001358	rna-binding protein	828	4	3.76096e-07	0.5075
A_001359	---NA---	791	0
A_001360	---NA---	896	0
A_001361	---NA---	716	0
A_001362	pleckstrin-like proteiny-like domain family b member 2	874	20	1.10637e-52	0.538
A_001363	myosin heavy nonmuscle or smooth muscle	730	20	1.3153e-31	0.7255
A_001364	---NA---	874	0
A_001365	---NA---	730	0
A_001366	---NA---	856	0
A_001367	cytoplasmic 2	728	11	2.16295e-10	0.711818
A_001368	atpase 6	817	20	1.41326e-59	0.8645
A_001369	atpase 6	782	20	1.94019e-71	0.855
A_001370	---NA---	1177	0
A_001371	---NA---	401	0
A_001372	---NA---	878	0
A_001373	---NA---	705	0
A_001374	---NA---	726	0
A_001375	---NA---	511	0
A_001376	---NA---	885	0
A_001377	---NA---	681	0
A_001378	set domain containing 2	812	20	9.47005e-08	0.6275
A_001379	wolf-hirschhorn syndrome candidate 1	755	19	3.12673e-07	0.754211
A_001380	---NA---	882	0
A_001381	---NA---	664	0
A_001382	---NA---	783	0
A_001383	---NA---	763	0
A_001384	---NA---	887	0
A_001385	---NA---	657	0
A_001386	---NA---	780	0
A_001387	---NA---	766	0
A_001388	rna-binding protein 1	1076	20	1.51896e-31	0.909
A_001389	rna-binding protein 1	470	20	2.93551e-32	0.909
A_001390	---NA---	871	0
A_001391	---NA---	671	0
A_001392	cell division cycle 5-like protein	1066	20	1.18423e-36	0.6895
A_001393	---NA---	476	0
A_001394	calmodulin	812	20	4.51629e-73	0.9925
A_001395	calmodulin	719	20	1.60361e-73	0.9925
A_001396	---NA---	1147	0
A_001397	---NA---	279	0
A_001398	mitochondrial ribosomal protein s11	825	20	1.50081e-49	0.833
A_001399	mitochondrial ribosomal protein s11	695	20	8.02515e-37	0.818
A_001400	adenosine kinase 2	782	20	3.29414e-87	0.7575
A_001401	adenosine kinase	733	20	2.0338e-56	0.7365
A_001402	---NA---	786	0
A_001403	---NA---	561	0
A_001404	---NA---	998	0
A_001405	transducin -like 2	362	20	1.26439e-19	0.692
A_001406	---NA---	868	0
A_001407	---NA---	441	0
A_001408	beta-tubulin	850	20	1.47006e-99	0.8375
A_001409	tubulin beta-2c chain	638	20	8.90416e-102	0.958
A_001410	---NA---	865	0
A_001411	---NA---	618	0
A_001412	retrotransposon unclassified	769	20	1.6155e-14	0.5605
A_001413	retrotransposon unclassified	673	20	1.22336e-14	0.5605
A_001414	---NA---	828	0
A_001415	---NA---	658	0
A_001416	peptidyl-prolyl cis-trans isomerase sdccag10	611	20	7.95231e-25	0.598
A_001417	isoform b	571	20	2.14087e-15	0.603
A_001418	ap1 gamma subunit binding protein 1	958	20	1.07194e-14	0.4905
A_001419	protein	497	19	1.11174e-07	0.643158
A_001420	---NA---	779	0
A_001421	---NA---	616	0
A_001422	thymosin isoform 2	1031	20	2.67372e-22	0.7375
A_001423	thymosin isoform 2	440	20	2.44385e-23	0.68
A_001424	---NA---	698	0
A_001425	---NA---	661	0
A_001426	oligopeptide transporter	745	20	5.49836e-41	0.5635
A_001427	solute carrier family 15 member 2-like	710	20	1.48292e-60	0.747
A_001428	---NA---	795	0
A_001429	---NA---	658	0
A_001430	trichoplein keratin filament-binding protein	768	20	5.92663e-26	0.586
A_001431	trichoplein keratin filament-binding protein	595	20	5.28353e-27	0.586
A_001432	molybdenum cofactor synthesis 1	914	20	3.48448e-60	0.832
A_001433	---NA---	545	0
A_001434	zinc finger protein	744	20	5.36277e-12	0.6465
A_001435	novel zinc finger protein protein	714	20	4.19528e-11	0.5905
A_001436	---NA---	774	0
A_001437	---NA---	484	0
A_001438	---NA---	748	0
A_001439	---NA---	617	0
A_001440	---NA---	918	0
A_001441	myosin light chain alkali	521	20	3.95134e-30	0.835
A_001442	---NA---	720	0
A_001443	---NA---	692	0
A_001444	wd-repeat protein	775	20	2.10564e-78	0.703
A_001445	wd repeat-containing protein 44-like	481	20	1.74512e-37	0.8845
A_001446	---NA---	724	0
A_001447	---NA---	682	0
A_001448	---NA---	713	0
A_001449	---NA---	678	0
A_001450	---NA---	854	0
A_001451	---NA---	493	0
A_001452	integrin alpha fg-gap repeat containing 1	711	20	1.59611e-31	0.6685
A_001453	integrin alpha fg-gap repeat containing 1	679	20	1.44799e-31	0.6685
A_001454	---NA---	755	0
A_001455	---NA---	626	0
A_001456	---NA---	737	0
A_001457	---NA---	655	0
A_001458	---NA---	849	0
A_001459	---NA---	246	0
A_001460	acyl- -binding protein	518	20	4.87354e-33	0.8055
A_001461	---NA---	180	0
A_001462	upf0587 protein c1orf123-like	842	20	3.85128e-23	0.6235
A_001463	tropomyosin	377	20	1.37321e-13	0.9985
A_001464	transcription elongation factor spt6	1129	20	4.10508e-67	0.6475
A_001465	---NA---	231	0
A_001466	heat shock protein 67b2	960	20	6.30457e-23	0.6355
A_001467	---NA---	322	0
A_001468	conserved hypothetical protein [Pediculus humanus corporis]	609	16	1.07728e-13	0.84
A_001469	conserved hypothetical protein [Pediculus humanus corporis]	479	16	6.06716e-14	0.84
A_001470	---NA---	768	0
A_001471	---NA---	559	0
A_001472	---NA---	734	0
A_001473	---NA---	598	0
A_001474	ferm domain containing 4a	673	20	2.63974e-09	0.61
A_001475	ferm domain containing 4a	663	20	2.55175e-09	0.609
A_001476	---NA---	689	0
A_001477	remodeling and spacing factor 1	644	20	8.76583e-12	0.6345
A_001478	longitudinals lacking	406	20	4.10385e-10	0.7505
A_001479	longitudinals lacking	341	20	6.66939e-13	0.686
A_001480	protein lap4	911	20	4.49279e-14	0.635
A_001481	---NA---	403	0
A_001482	dna topoisomerase iv subunit a	783	8	3.75762e-06	0.4925
A_001483	---NA---	529	0
A_001484	sialin, putative [Ixodes scapularis]	863	20	3.57847e-56	0.609
A_001485	block of proliferation 1	446	20	2.93378e-48	0.796
A_001486	alpha-aminoadipic semialdehyde mitochondrial	813	20	1.25749e-27	0.8355
A_001487	poly	490	20	8.57108e-16	0.5335
A_001488	---NA---	715	0
A_001489	---NA---	590	0
A_001490	---NA---	833	0
A_001491	---NA---	466	0
A_001492	serpin 6 precursor	675	20	1.08112e-18	0.5905
A_001493	serine proteinase inhibitor	628	20	1.14501e-21	0.6235
A_001494	---NA---	652	0
A_001495	---NA---	634	0
A_001496	importin nuclear transport	783	20	2.08479e-81	0.735
A_001497	importin nuclear transport	505	20	2.42637e-18	0.7115
A_001498	drebrin-like protein	775	20	7.3214e-39	0.605
A_001499	drebrin-like protein	508	20	8.82511e-24	0.637
A_001500	---NA---	683	0
A_001501	---NA---	597	0
A_001502	zinc finger protein	755	20	9.39253e-12	0.61
A_001503	---NA---	520	0
A_001504	---NA---	662	0
A_001505	---NA---	617	0
A_001506	---NA---	682	0
A_001507	---NA---	587	0
A_001508	---NA---	674	0
A_001509	---NA---	600	0
A_001510	---NA---	752	0
A_001511	short-chain dehydrogenase	515	20	2.81018e-09	0.5835
A_001512	nop16 nucleolar protein homolog	752	20	5.63562e-17	0.4725
A_001513	nucleolar protein 16-like	504	20	1.80361e-05	0.5295
A_001514	hypothetical protein LOAG_14742 [Loa loa]	654	2	4.80831e-05	0.495
A_001515	---NA---	586	0
A_001516	---NA---	743	0
A_001517	---NA---	512	0
A_001518	---NA---	895	0
A_001519	---NA---	355	0
A_001520	conserved hypothetical protein [Ixodes scapularis]	657	1	4.5362e-07	0.42
A_001521	---NA---	575	0
A_001522	---NA---	663	0
A_001523	---NA---	572	0
A_001524	splicing arginine serine-rich 1	590	20	5.11336e-39	0.8715
A_001525	---NA---	401	0
A_001526	mrna (guanine-7-)methyltransferase	803	20	7.27393e-44	0.678
A_001527	---NA---	368	0
A_001528	---NA---	630	0
A_001529	---NA---	583	0
A_001530	serine protease	720	20	3.56217e-66	0.556
A_001531	coagulation factor vii	487	20	5.36821e-34	0.6015
A_001532	---NA---	725	0
A_001533	---NA---	475	0
A_001534	zinc finger hit domain-containing protein 1	659	20	4.24271e-17	0.7945
A_001535	zinc finger hit domain-containing protein 1	532	20	2.39099e-17	0.821
A_001536	---NA---	630	0
A_001537	---NA---	561	0
A_001538	calcium-binding protein p22	602	20	2.94678e-77	0.88
A_001539	calcium-binding protein p22	580	20	2.08623e-45	0.875
A_001540	---NA---	874	0
A_001541	---NA---	307	0
A_001542	---NA---	597	0
A_001543	---NA---	584	0
A_001544	---NA---	879	0
A_001545	isoform b	294	11	1.32847e-08	0.519091
A_001546	isoform k	606	20	2.77565e-38	0.5685
A_001547	isoform k	567	20	3.12307e-35	0.532
A_001548	---NA---	760	0
A_001549	---NA---	407	0
A_001550	---NA---	713	0
A_001551	---NA---	454	0
A_001552	---NA---	534	0
A_001553	---NA---	503	0
A_001554	---NA---	457	0
A_001555	---NA---	428	0
A_001556	la-related protein	750	20	2.13657e-24	0.652
A_001557	---NA---	406	0
A_001558	inositol polyphosphate-5- 75kda	591	20	1.47033e-17	0.484
A_001559	inositol polyphosphate 5-phosphatase ocrl-1	561	18	1.7202e-14	0.478889
A_001560	---NA---	607	0
A_001561	---NA---	544	0
A_001562	baculoviral iap repeat-containing 2	623	20	7.75666e-07	0.68
A_001563	fha domain protein	530	2	2.75491e-05	0.555
A_001564	structural maintenance of chromosomes protein 3	615	20	2.38316e-69	0.736
A_001565	structural maintenance of chromosomes protein 3	529	20	6.46653e-55	0.759
A_001566	---NA---	616	0
A_001567	---NA---	535	0
A_001568	cop9 signalosome complex subunit 4	804	20	3.13964e-80	0.8515
A_001569	---NA---	326	0
A_001570	---NA---	579	0
A_001571	---NA---	561	0
A_001572	---NA---	586	0
A_001573	---NA---	538	0
A_001574	---NA---	699	0
A_001575	---NA---	429	0
A_001576	---NA---	692	0
A_001577	---NA---	334	0
A_001578	---NA---	598	0
A_001579	---NA---	530	0
A_001580	---NA---	395	0
A_001581	---NA---	529	0
A_001582	wd repeat domain phosphoinositide-interacting protein 4	596	20	9.36305e-75	0.8195
A_001583	wd repeat domain phosphoinositide-interacting protein 4	521	20	4.49999e-42	0.815
A_001584	---NA---	632	0
A_001585	hypothetical protein EAG_03557 [Camponotus floridanus]	486	3	6.1849e-06	0.713333
A_001586	---NA---	606	0
A_001587	---NA---	492	0
A_001588	peptidyl-prolyl cis-trans isomerase-like 3	655	20	1.33632e-47	0.8485
A_001589	peptidyl-prolyl cis-trans isomerase-like 3	452	20	1.03796e-17	0.9105
A_001590	integral membrane protein 1	558	20	3.45802e-76	0.944
A_001591	integral membrane protein 1	546	20	1.98364e-89	0.9455
A_001592	---NA---	742	0
A_001593	---NA---	349	0
A_001594	---NA---	554	0
A_001595	---NA---	536	0
A_001596	---NA---	662	0
A_001597	---NA---	337	0
A_001598	---NA---	576	0
A_001599	---NA---	509	0
A_001600	---NA---	624	0
A_001601	---NA---	394	0
A_001602	---NA---	639	0
A_001603	---NA---	442	0
A_001604	---NA---	587	0
A_001605	---NA---	476	0
A_001606	ribosomal protein l12	560	20	1.5667e-44	0.9155
A_001607	ribosomal protein l12	448	20	5.88581e-49	0.893
A_001608	---NA---	766	0
A_001609	---NA---	311	0
A_001610	---NA---	422	0
A_001611	ribosomal rna methyltransferase 2-like	269	20	3.35647e-20	0.7125
A_001612	---NA---	560	0
A_001613	---NA---	503	0
A_001614	abrupt protein	700	20	5.36987e-24	0.685
A_001615	broad-complex core protein isoform 6	371	20	5.07085e-24	0.682
A_001616	---NA---	536	0
A_001617	---NA---	535	0
A_001618	---NA---	612	0
A_001619	---NA---	413	0
A_001620	---NA---	579	0
A_001621	---NA---	491	0
A_001622	---NA---	649	0
A_001623	---NA---	398	0
A_001624	---NA---	596	0
A_001625	---NA---	462	0
A_001626	interleukin enhancer binding factor 2	675	20	2.35315e-67	0.849
A_001627	interleukin enhancer-binding factor 2-like protein	384	20	1.89329e-15	0.906
A_001628	transmembrane protein 145	660	20	1.37131e-39	0.7725
A_001629	---NA---	396	0
A_001630	---NA---	547	0
A_001631	tail protein	490	5	2.33955e-05	0.42
A_001632	muscle-specific protein 300	607	13	1.34357e-08	0.679231
A_001633	muscle-specific protein isoform i	439	20	1.53429e-17	0.5455
A_001634	valyl-trna synthetase	556	20	8.67397e-64	0.753
A_001635	valyl-trna synthetase	483	20	1.56539e-41	0.845
A_001636	PREDICTED: hypothetical protein [Strongylocentrotus purpuratus]	761	1	0.000252055	0.42
A_001637	---NA---	277	0
A_001638	---NA---	609	0
A_001639	---NA---	431	0
A_001640	autophagy-related protein 7	642	20	4.87749e-54	0.6575
A_001641	autophagy-related protein 7	395	20	2.79165e-14	0.641
A_001642	cysteinyl-trna synthetase	519	20	1.11096e-32	0.731
A_001643	cysteinyl-trna cytoplasmic	516	20	2.74181e-60	0.777
A_001644	---NA---	550	0
A_001645	---NA---	474	0
A_001646	calumenin	549	20	1.16143e-44	0.676
A_001647	supercoiling isoform a	470	20	7.01948e-18	0.689
A_001648	---NA---	675	0
A_001649	---NA---	319	0
A_001650	---NA---	577	0
A_001651	---NA---	360	0
A_001652	lmbr1 domain-containing protein 2-like protein	531	20	4.80653e-26	0.6225
A_001653	lmbr1 domain-containing protein 2-like protein	487	20	1.31888e-21	0.7615
A_001654	---NA---	505	0
A_001655	---NA---	443	0
A_001656	---NA---	594	0
A_001657	---NA---	420	0
A_001658	---NA---	641	0
A_001659	---NA---	368	0
A_001660	myo18a protein	586	20	4.72212e-29	0.6815
A_001661	wiskott-aldrich syndrome protein	427	20	4.30665e-23	0.7365
A_001662	---NA---	490	0
A_001663	---NA---	482	0
A_001664	---NA---	580	0
A_001665	---NA---	418	0
A_001666	conserved hypothetical protein [Ixodes scapularis]	611	20	5.65949e-47	0.8685
A_001667	Otopetrin-2 [Camponotus floridanus]	388	20	3.3208e-20	0.675
A_001668	---NA---	316	0
A_001669	---NA---	143	0
A_001670	p76 protein	630	20	3.67173e-76	0.761
A_001671	lysophospholipase family protein	359	20	8.49454e-24	0.8345
A_001672	---NA---	537	0
A_001673	---NA---	452	0
A_001674	sh3 domain-containing ring finger protein 3	628	20	9.93813e-50	0.7745
A_001675	---NA---	363	0
A_001676	---NA---	526	0
A_001677	---NA---	463	0
A_001678	---NA---	535	0
A_001679	---NA---	451	0
A_001680	---NA---	591	0
A_001681	---NA---	369	0
A_001682	---NA---	507	0
A_001683	---NA---	473	0
A_001684	---NA---	513	0
A_001685	---NA---	464	0
A_001686	---NA---	520	0
A_001687	---NA---	451	0
A_001688	---NA---	574	0
A_001689	---NA---	400	0
A_001690	---NA---	503	0
A_001691	---NA---	470	0
A_001692	---NA---	522	0
A_001693	---NA---	449	0
A_001694	transposon i	727	18	7.45413e-15	0.524444
A_001695	pol-like protein	231	20	1.05263e-05	0.6205
A_001696	---NA---	476	0
A_001697	---NA---	464	0
A_001698	reverse transcriptase	491	20	2.20695e-25	0.558
A_001699	pol-like protein	446	20	2.70784e-18	0.5715
A_001700	---NA---	478	0
A_001701	---NA---	460	0
A_001702	---NA---	514	0
A_001703	---NA---	447	0
A_001704	cop-coated vesicle membrane protein p24	563	20	7.39277e-50	0.754
A_001705	cop-coated vesicle membrane protein p24	392	20	9.32063e-15	0.7925
A_001706	---NA---	537	0
A_001707	---NA---	416	0
A_001708	trna isopentenyltransferase	511	19	1.7056e-13	0.457895
A_001709	trna isopentenyltransferase	442	20	4.65713e-18	0.5925
A_001710	---NA---	518	0
A_001711	---NA---	430	0
A_001712	---NA---	474	0
A_001713	---NA---	468	0
A_001714	---NA---	509	0
A_001715	---NA---	427	0
A_001716	---NA---	561	0
A_001717	---NA---	376	0
A_001718	---NA---	474	0
A_001719	---NA---	362	0
A_001720	---NA---	516	0
A_001721	arginine kinase	403	20	5.014e-24	0.7095
A_001722	ribosomal protein l31	503	20	3.40817e-25	0.8735
A_001723	ribosomal protein l31	421	20	1.19951e-33	0.8385
A_001724	---NA---	466	0
A_001725	---NA---	454	0
A_001726	---NA---	563	0
A_001727	---NA---	359	0
A_001728	---NA---	469	0
A_001729	---NA---	443	0
A_001730	---NA---	523	0
A_001731	senescence-associated	393	20	4.3069e-15	0.882
A_001732	---NA---	536	0
A_001733	---NA---	380	0
A_001734	---NA---	513	0
A_001735	---NA---	387	0
A_001736	---NA---	473	0
A_001737	---NA---	390	0
A_001738	---NA---	461	0
A_001739	---NA---	433	0
A_001740	trafficking protein particle complex 3	493	20	3.5597e-38	0.8535
A_001741	trafficking protein particle complex subunit 3	402	20	3.15953e-48	0.8575
A_001742	fructose -bisphosphate aldolase	475	20	2.47436e-15	0.7295
A_001743	---NA---	427	0
A_001744	---NA---	466	0
A_001745	---NA---	400	0
A_001746	---NA---	466	0
A_001747	---NA---	433	0
A_001748	---NA---	543	0
A_001749	---NA---	359	0
A_001750	---NA---	478	0
A_001751	---NA---	424	0
A_001752	atp-dependent transporter	470	20	6.47924e-64	0.8295
A_001753	atp-dependent transporter	429	20	3.93375e-37	0.8555
A_001754	---NA---	525	0
A_001755	---NA---	369	0
A_001756	---NA---	502	0
A_001757	---NA---	363	0
A_001758	---NA---	512	0
A_001759	gaf domain containing protein	379	3	6.15378e-06	0.58
A_001760	---NA---	462	0
A_001761	---NA---	427	0
A_001762	methylenetetrahydrofolate dehydrogenase (nadp+ dependent) methenyltetrahydrofolate formyltetrahydrofolate synthetase	680	20	5.36195e-58	0.803
A_001763	---NA---	210	0
A_001764	upf0436 protein c9orf6-like	271	20	9.12944e-10	0.655
A_001765	PREDICTED: hypothetical protein [Strongylocentrotus purpuratus]	239	1	0.000978538	0.66
A_001766	40s ribosomal protein s11	449	20	3.92061e-69	0.8745
A_001767	ribosomal protein s11	438	20	1.97157e-73	0.8805
A_001768	---NA---	496	0
A_001769	---NA---	378	0
A_001770	longitudinals lacking	330	20	1.03834e-21	0.699
A_001771	---NA---	244	0
A_001772	---NA---	503	0
A_001773	---NA---	374	0
A_001774	---NA---	518	0
A_001775	---NA---	357	0
A_001776	---NA---	496	0
A_001777	---NA---	379	0
A_001778	---NA---	380	0
A_001779	---NA---	256	0
A_001780	basic proline-rich protein	477	8	1.76937e-05	0.72875
A_001781	basic proline-rich protein	393	8	1.8137e-05	0.72875
A_001782	t-cell immunomodulatory protein	483	20	5.99002e-17	0.5805
A_001783	---NA---	387	0
A_001784	cullin 5	500	20	1.62321e-67	0.8265
A_001785	cullin 5	371	20	4.57576e-33	0.9275
A_001786	---NA---	442	0
A_001787	---NA---	414	0
A_001788	---NA---	442	0
A_001789	---NA---	418	0
A_001790	---NA---	508	0
A_001791	---NA---	348	0
A_001792	---NA---	469	0
A_001793	---NA---	362	0
A_001794	---NA---	428	0
A_001795	---NA---	414	0
A_001796	gag-like protein	418	20	3.52916e-09	0.5135
A_001797	gag-like protein	431	20	3.47019e-09	0.51
A_001798	---NA---	426	0
A_001799	---NA---	416	0
A_001800	---NA---	420	0
A_001801	---NA---	394	0
A_001802	mitotic control protein dis3	512	20	9.97015e-47	0.796
A_001803	exosome complex exonuclease rrp44	323	20	2.59254e-12	0.8055
A_001804	---NA---	420	0
A_001805	---NA---	391	0
A_001806	---NA---	453	0
A_001807	---NA---	369	0
A_001808	---NA---	451	0
A_001809	---NA---	368	0
A_001810	---NA---	421	0
A_001811	---NA---	415	0
A_001812	---NA---	412	0
A_001813	senescence-associated protein	343	20	2.20228e-27	0.878
A_001814	---NA---	470	0
A_001815	---NA---	368	0
A_001816	---NA---	449	0
A_001817	---NA---	369	0
A_001818	triple functional domain protein	413	20	1.34549e-29	0.729
A_001819	triple functional domain protein	415	20	8.68493e-29	0.7245
A_001820	---NA---	618	0
A_001821	---NA---	213	0
A_001822	---NA---	483	0
A_001823	hypothetical protein SORBIDRAFT_0351s002020 [Sorghum bicolor]	342	1	1.13631e-07	0.8
A_001824	---NA---	476	0
A_001825	hypothetical protein [Thermobia domestica]	344	1	9.61947e-07	0.77
A_001826	---NA---	339	0
A_001827	---NA---	392	0
A_001828	microtubule-associated protein	498	18	1.91179e-19	0.812222
A_001829	---NA---	317	0
A_001830	probable g-protein coupled receptor 125-like	424	20	2.34201e-13	0.4935
A_001831	probable g-protein coupled receptor 125-like	397	17	5.24346e-13	0.822353
A_001832	---NA---	450	0
A_001833	---NA---	362	0
A_001834	dna repair protein rad50	456	20	2.23323e-08	0.572
A_001835	---NA---	354	0
A_001836	---NA---	487	0
A_001837	---NA---	321	0
A_001838	mitochondrial ribosomal protein s25	407	20	1.44949e-31	0.821
A_001839	mitochondrial ribosomal protein s25	404	20	1.84118e-26	0.768
A_001840	---NA---	439	0
A_001841	---NA---	369	0
A_001842	---NA---	476	0
A_001843	---NA---	316	0
A_001844	minichromosome maintenance complex component 2	478	20	2.05181e-56	0.8805
A_001845	dna replication licensing factor mcm2	328	20	5.34051e-26	0.918
A_001846	loc495958 protein	428	20	1.36091e-29	0.795
A_001847	---NA---	379	0
A_001848	---NA---	420	0
A_001849	---NA---	386	0
A_001850	---NA---	461	0
A_001851	---NA---	336	0
A_001852	---NA---	400	0
A_001853	---NA---	394	0
A_001854	---NA---	423	0
A_001855	---NA---	366	0
A_001856	---NA---	427	0
A_001857	---NA---	369	0
A_001858	unnamed protein product [Tetraodon nigroviridis]	423	1	0.000578197	0.55
A_001859	---NA---	365	0
A_001860	---NA---	398	0
A_001861	---NA---	389	0
A_001862	---NA---	404	0
A_001863	---NA---	372	0
A_001864	zinc finger protein	415	20	5.39419e-29	0.6855
A_001865	zinc finger protein	333	18	1.18503e-14	0.663333
A_001866	---NA---	401	0
A_001867	calsyntenin-1-like isoform 1	381	8	2.17492e-11	0.69375
A_001868	---NA---	432	0
A_001869	---NA---	335	0
A_001870	---NA---	390	0
A_001871	---NA---	365	0
A_001872	---NA---	407	0
A_001873	---NA---	353	0
A_001874	hypothetical protein PPL_01745 [Polysphondylium pallidum PN500]	475	1	0.00043778	0.5
A_001875	hypothetical protein PPL_01745 [Polysphondylium pallidum PN500]	277	1	0.000569101	0.49
A_001876	---NA---	402	0
A_001877	---NA---	355	0
A_001878	isoform b	403	11	8.89169e-05	0.488182
A_001879	---NA---	359	0
A_001880	---NA---	380	0
A_001881	breast cancer type 1 susceptibility protein homolog	380	20	5.55297e-15	0.581
A_001882	---NA---	435	0
A_001883	---NA---	316	0
A_001884	---NA---	377	0
A_001885	---NA---	376	0
A_001886	hypothetical protein G5I_01836 [Acromyrmex echinatior]	411	1	0.00074345	0.54
A_001887	---NA---	330	0
A_001888	---NA---	375	0
A_001889	---NA---	365	0
A_001890	---NA---	382	0
A_001891	---NA---	357	0
A_001892	---NA---	409	0
A_001893	---NA---	329	0
A_001894	cullin- isoform b	408	20	1.22484e-22	0.8335
A_001895	cullin- isoform b	326	20	1.31426e-40	0.8215
A_001896	mitochondrial ribosomal protein s35	446	20	1.2785e-35	0.679
A_001897	---NA---	291	0
A_001898	---NA---	384	0
A_001899	---NA---	342	0
A_001900	mannose-1-phosphate guanyltransferase alpha-a	381	20	3.49821e-40	0.879
A_001901	mannose-1-phosphate guanyltransferase	355	20	2.61342e-37	0.8585
A_001902	FimV protein [Bacillus sp. NRRL B-14911]	374	1	0.000260609	0.51
A_001903	---NA---	328	0
A_001904	---NA---	439	0
A_001905	---NA---	289	0
A_001906	---NA---	366	0
A_001907	---NA---	351	0
A_001908	---NA---	377	0
A_001909	---NA---	340	0
A_001910	---NA---	360	0
A_001911	---NA---	359	0
A_001912	---NA---	358	0
A_001913	---NA---	359	0
A_001914	---NA---	363	0
A_001915	---NA---	329	0
A_001916	protein odr-4-like protein	381	9	5.54364e-07	0.524444
A_001917	hypothetical protein DAPPUDRAFT_315076 [Daphnia pulex]	331	1	1.36241e-05	0.83
A_001918	---NA---	369	0
A_001919	---NA---	330	0
A_001920	---NA---	358	0
A_001921	---NA---	346	0
A_001922	---NA---	469	0
A_001923	---NA---	231	0
A_001924	---NA---	426	0
A_001925	---NA---	256	0
A_001926	hypothetical protein [Paramecium tetraurelia strain d4-2]	416	1	0.000332331	0.41
A_001927	---NA---	268	0
A_001928	lysine-specific demethylase 3b	350	20	8.02504e-30	0.7795
A_001929	lysine-specific demethylase 3b	333	20	4.61106e-46	0.746
A_001930	---NA---	348	0
A_001931	---NA---	334	0
A_001932	rna-binding protein mex3b	363	20	1.6487e-11	0.823
A_001933	loc733399 protein	316	20	2.524e-15	0.759
A_001934	---NA---	436	0
A_001935	---NA---	234	0
A_001936	predicted protein [Nematostella vectensis]	405	1	0.000336496	0.66
A_001937	---NA---	268	0
A_001938	---NA---	366	0
A_001939	---NA---	295	0
A_001940	---NA---	401	0
A_001941	---NA---	251	0
A_001942	---NA---	432	0
A_001943	---NA---	215	0
A_001944	protein	320	20	1.0933e-10	0.474
A_001945	protein	304	20	2.60386e-10	0.5195
A_001946	---NA---	336	0
A_001947	---NA---	281	0
A_001948	glucose dehydrogenase	418	10	1.21295e-09	0.646
A_001949	---NA---	198	0
A_001950	---NA---	338	0
A_001951	---NA---	277	0
A_001952	---NA---	313	0
A_001953	---NA---	295	0
A_001954	---NA---	416	0
A_001955	---NA---	185	0
A_001956	tigger transposable element derived 1	361	20	8.48106e-16	0.6185
A_001957	---NA---	223	0
A_001958	---NA---	387	0
A_001959	---NA---	195	0
A_001960	---NA---	288	0
A_001961	---NA---	254	0
A_001962	---NA---	275	0
A_001963	---NA---	242	0
A_001964	protein	297	20	1.13406e-10	0.5295
A_001965	tap1 protein	222	3	8.59878e-05	0.646667
A_001966	---NA---	317	0
A_001967	---NA---	176	0
A_001968	---NA---	244	0
A_001969	---NA---	204	0
A_001970	---NA---	137	0
A_001971	---NA---	107	0
A_001972	chorion peroxidase-like	3705	20	6.53193e-109	0.596
A_001973	---NA---	1041	0
A_001974	pdz domain protein	485	20	1.09164e-18	0.658
A_001975	moesin ezrin radixin	3546	20	0	0.879
A_001976	moesin ezrin radixin	2689	20	1.8546e-152	0.868
A_001977	lim domain protein	3444	20	2.14614e-76	0.525
A_001978	lim domain and actin-binding protein 1	3050	20	9.58899e-51	0.6525
A_001979	ef-hand domain-containing protein d1-like	3539	11	5.77418e-06	0.548182
A_001980	ef-hand domain-containing protein d1-like	2590	13	4.07903e-06	0.547692
A_001981	adiponectin receptor	3368	20	4.92941e-31	0.907
A_001982	---NA---	2305	0
A_001983	translation initiation factor 2 gamma subunit	2667	20	0	0.9065
A_001984	translation initiation factor 2 gamma subunit	2565	20	0	0.9065
A_001985	polyadenylate-binding protein	2732	20	0	0.7545
A_001986	poly binding cytoplasmic 1	2102	20	1.30611e-99	0.7495
A_001987	adenylate kinase 1	2924	20	2.20944e-64	0.7705
A_001988	adenylate kinase 1	2340	20	1.71277e-64	0.7705
A_001989	fructose -bisphosphate aldolase	2348	20	2.94964e-157	0.8275
A_001990	fructose -bisphosphate aldolase	2176	20	2.68486e-157	0.8275
A_001991	phosphoenolpyruvate carboxykinase	2364	20	0	0.824
A_001992	phosphoenolpyruvate carboxykinase	2199	20	0	0.8075
A_001993	lysosomal membrane glycoprotein-2	2235	3	1.64455e-08	0.473333
A_001994	lysosomal membrane glycoprotein-2	2225	3	1.63355e-08	0.473333
A_001995	heat shock cognate 70 protein	2223	20	0	0.9435
A_001996	heat shock cognate 70 protein	2171	20	0	0.9435
A_001997	atp-binding cassette sub-family e member 1	3141	20	0	0.883
A_001998	atp-binding sub-family e member 1	1239	20	4.57149e-175	0.9085
[truncated: 14,492 more rows]

## Sheet: GFP Singletons
	Summary of BlastX results from GFP singletons
Seq. Name	Seq. Description	Seq. Length	#Hits	min. eValue	mean Similarity
A_G1OH9PT01ESU2L	---NA---	64	0
A_G1OH9PT01EXSJT	---NA---	67	0
A_G1OH9PT01EP7C3	---NA---	64	0
A_G1OH9PT01EH6LQ	---NA---	87	0
A_G1OH9PT01DS9TS	---NA---	94	0
A_G1OH9PT01AVHQY	---NA---	54	0
A_G1OH9PT01D8W2V	---NA---	60	0
A_G1OH9PT01DVQSP	---NA---	56	0
A_G1OH9PT01B0N88	---NA---	68	0
A_G1OH9PT01D5W31	---NA---	72	0
A_G1OH9PT01DBAMG	---NA---	105	0
A_G1OH9PT01EWQNJ	---NA---	137	0
A_G1OH9PT01B1PGL	---NA---	72	0
A_G1OH9PT01ETZKZ	---NA---	168	0
A_G1OH9PT01ADQN3	---NA---	81	0
A_G1OH9PT01A99JS	---NA---	71	0
A_G1OH9PT01DITE2	---NA---	55	0
A_G1OH9PT01DMCB4	---NA---	106	0
A_G1OH9PT01BAU4U	---NA---	157	0
A_G1OH9PT01ES0EY	---NA---	56	0
A_G1OH9PT01EDJ48	---NA---	91	0
A_G1OH9PT01D91FZ	---NA---	87	0
A_G1OH9PT01ESNVN	senescence-associated	156	20	7.12028e-17	0.822
A_G1OH9PT01C1MXJ	---NA---	66	0
A_G1OH9PT01BV1KI	---NA---	62	0
A_G1OH9PT01B3427	---NA---	129	0
A_G1OH9PT01EMSGI	---NA---	53	0
A_G1OH9PT01CWPXB	---NA---	158	0
A_G1OH9PT01ERQLS	---NA---	94	0
A_G1OH9PT01BTWHT	---NA---	54	0
A_G1OH9PT01EJCPJ	---NA---	61	0
A_G1OH9PT01CJVQE	---NA---	62	0
A_G1OH9PT01B7YC8	---NA---	132	0
A_G1OH9PT01BFZA9	---NA---	116	0
A_G1OH9PT01EXA7V	---NA---	129	0
A_G1OH9PT01CAGSB	---NA---	54	0
A_G1OH9PT01CEFT1	---NA---	324	0
A_G1OH9PT01EIJ1X	---NA---	83	0
A_G1OH9PT01BP11A	---NA---	56	0
A_G1OH9PT01BEAEQ	---NA---	81	0
A_G1OH9PT01DFZBM	---NA---	150	0
A_G1OH9PT01CG96E	---NA---	208	0
A_G1OH9PT01DULPZ	---NA---	107	0
A_G1OH9PT01A6TE7	---NA---	50	0
A_G1OH9PT01BOJF4	---NA---	56	0
A_G1OH9PT01D5K5X	---NA---	111	0
A_G1OH9PT01C7BY5	---NA---	52	0
A_G1OH9PT01B9D7D	---NA---	55	0
A_G1OH9PT01A7153	---NA---	95	0
A_G1OH9PT01DHUSN	---NA---	55	0
A_G1OH9PT01D89IF	---NA---	85	0
A_G1OH9PT01C7D7Z	---NA---	98	0
A_G1OH9PT01EGGU1	---NA---	70	0
A_G1OH9PT01D0388	---NA---	61	0
A_G1OH9PT01EO2RC	---NA---	86	0
A_G1OH9PT01D12BJ	---NA---	60	0
A_G1OH9PT01ERUK0	---NA---	109	0
A_G1OH9PT01C5ZFE	---NA---	54	0
A_G1OH9PT01A8019	---NA---	53	0
A_G1OH9PT01BNCDG	---NA---	73	0
A_G1OH9PT01CHXE2	---NA---	78	0
A_G1OH9PT01BSUN5	---NA---	117	0
A_G1OH9PT01EUYL1	---NA---	64	0
A_G1OH9PT01DB5OP	protein	163	20	4.26616e-10	0.724
A_G1OH9PT01EB617	---NA---	72	0
A_G1OH9PT01CG7SV	---NA---	52	0
A_G1OH9PT01EMN06	---NA---	101	0
A_G1OH9PT01DZRH7	---NA---	56	0
A_G1OH9PT01EX0A1	---NA---	168	0
A_G1OH9PT01BCO98	---NA---	57	0
A_G1OH9PT01EDE0S	---NA---	114	0
A_G1OH9PT01CYF76	---NA---	69	0
A_G1OH9PT01DYG95	---NA---	54	0
A_G1OH9PT01DGNJ9	---NA---	101	0
A_G1OH9PT01E0D1Y	---NA---	65	0
A_G1OH9PT01C8GPD	---NA---	132	0
A_G1OH9PT01ERB35	---NA---	162	0
A_G1OH9PT01B8C09	---NA---	134	0
A_G1OH9PT01B7QOJ	---NA---	187	0
A_G1OH9PT01DHZEL	---NA---	176	0
A_G1OH9PT01EH20I	---NA---	88	0
A_G1OH9PT01BECZ6	myosin heavy chain	178	20	1.08477e-19	0.9955
A_G1OH9PT01DDMWH	---NA---	115	0
A_G1OH9PT01BTC5K	---NA---	117	0
A_G1OH9PT01AYJ69	---NA---	59	0
A_G1OH9PT01ERHKI	---NA---	194	0
A_G1OH9PT01EVNPZ	---NA---	148	0
A_G1OH9PT01EBC8K	---NA---	57	0
A_G1OH9PT01EPT69	---NA---	87	0
A_G1OH9PT01DZKIW	---NA---	52	0
A_G1OH9PT01EHFWF	---NA---	59	0
A_G1OH9PT01DG2IY	---NA---	91	0
A_G1OH9PT01C5P35	---NA---	68	0
A_G1OH9PT01DZLJR	---NA---	55	0
A_G1OH9PT01B8EC4	---NA---	153	0
A_G1OH9PT01D03TP	---NA---	86	0
A_G1OH9PT01C9LX6	---NA---	77	0
A_G1OH9PT01BAY9F	---NA---	167	0
A_G1OH9PT01COACB	---NA---	122	0
A_G1OH9PT01DQ0D5	---NA---	89	0
A_G1OH9PT01BMO6C	---NA---	68	0
A_G1OH9PT01B9QLM	---NA---	72	0
A_G1OH9PT01C9CBM	---NA---	167	0
A_G1OH9PT01EJC43	conserved hypothetical protein [Pediculus humanus corporis]	205	15	2.09305e-18	0.844
A_G1OH9PT01CCF2F	---NA---	82	0
A_G1OH9PT01ELV6V	---NA---	70	0
A_G1OH9PT01DXWVT	---NA---	94	0
A_G1OH9PT01EUKDB	---NA---	59	0
A_G1OH9PT01DJD4F	---NA---	274	0
A_G1OH9PT01EB6R9	---NA---	70	0
A_G1OH9PT01EZ1B7	---NA---	158	0
A_G1OH9PT01DK0DA	---NA---	92	0
A_G1OH9PT01DRGUN	---NA---	68	0
A_G1OH9PT01CF7L0	---NA---	88	0
A_G1OH9PT01AT86A	---NA---	137	0
A_G1OH9PT01BAKNG	---NA---	144	0
A_G1OH9PT01EB5AM	---NA---	159	0
A_G1OH9PT01ESDEJ	isoform g	178	20	5.83051e-17	0.894
A_G1OH9PT01DPNIO	---NA---	173	0
A_G1OH9PT01CMZQ0	---NA---	202	0
A_G1OH9PT01DXX68	---NA---	71	0
A_G1OH9PT01CYM5T	---NA---	124	0
A_G1OH9PT01D73JG	---NA---	56	0
A_G1OH9PT01ELMD9	---NA---	197	0
A_G1OH9PT01DUUX2	---NA---	247	0
A_G1OH9PT01DX5GB	---NA---	89	0
A_G1OH9PT01ARGA8	---NA---	127	0
A_G1OH9PT01B3MOG	---NA---	121	0
A_G1OH9PT01DVWGZ	x-prolyl aminopeptidase (aminopeptidase p) soluble	305	20	3.74365e-25	0.7105
A_G1OH9PT01DULD1	---NA---	58	0
A_G1OH9PT01AX4EJ	---NA---	61	0
A_G1OH9PT01BJBJ6	---NA---	54	0
A_G1OH9PT01CAE4J	ac1147-like protein	311	2	1.99662e-07	0.495
A_G1OH9PT01ELWCC	---NA---	109	0
A_G1OH9PT01D1MZ3	---NA---	181	0
A_G1OH9PT01D4Z2W	---NA---	175	0
A_G1OH9PT01DJ8VU	---NA---	120	0
A_G1OH9PT01EYZXY	---NA---	189	0
A_G1OH9PT01BOSLH	---NA---	52	0
A_G1OH9PT01D9QCY	---NA---	108	0
A_G1OH9PT01ATIBX	---NA---	55	0
A_G1OH9PT01B1783	---NA---	219	0
A_G1OH9PT01A9QZV	---NA---	223	0
A_G1OH9PT01DQ32X	---NA---	69	0
A_G1OH9PT01C41DZ	---NA---	52	0
A_G1OH9PT01DHY9R	---NA---	299	0
A_G1OH9PT01C2K7L	---NA---	172	0
A_G1OH9PT01EHRCR	---NA---	56	0
A_G1OH9PT01BLWMA	---NA---	61	0
A_G1OH9PT01CO2XN	---NA---	118	0
A_G1OH9PT01AO532	---NA---	226	0
A_G1OH9PT01BWM3W	---NA---	131	0
A_G1OH9PT01CIUAO	---NA---	81	0
A_G1OH9PT01ELJ4O	---NA---	65	0
A_G1OH9PT01E1UN8	---NA---	188	0
A_G1OH9PT01DSLU0	unnamed protein product [Tetraodon nigroviridis]	181	3	4.34255e-12	0.75
A_G1OH9PT01A6ZRP	---NA---	96	0
A_G1OH9PT01BBELE	---NA---	286	0
A_G1OH9PT01CZ7WA	---NA---	181	0
A_G1OH9PT01ED843	---NA---	106	0
A_G1OH9PT01BTZXJ	microtubule-associated serine threonine-protein kinase 2	209	8	6.50606e-06	0.64125
A_G1OH9PT01DYN4X	---NA---	75	0
A_G1OH9PT01DC9KE	---NA---	62	0
A_G1OH9PT01ADWXF	---NA---	68	0
A_G1OH9PT01C2OJ8	---NA---	62	0
A_G1OH9PT01DBBUE	---NA---	121	0
A_G1OH9PT01BJP5C	---NA---	80	0
A_G1OH9PT01CMGAU	---NA---	183	0
A_G1OH9PT01B9XQB	---NA---	61	0
A_G1OH9PT01ELO80	---NA---	154	0
A_G1OH9PT01D6P2L	---NA---	186	0
A_G1OH9PT01BID7G	---NA---	57	0
A_G1OH9PT01BNN99	---NA---	68	0
A_G1OH9PT01DJD03	---NA---	93	0
A_G1OH9PT01DZLIJ	---NA---	61	0
A_G1OH9PT01CXWWF	---NA---	134	0
A_G1OH9PT01B9MO8	---NA---	51	0
A_G1OH9PT01CWJD0	---NA---	129	0
A_G1OH9PT01AI0IQ	---NA---	154	0
A_G1OH9PT01A5DTI	---NA---	56	0
A_G1OH9PT01DFKDW	---NA---	305	0
A_G1OH9PT01D4C5R	---NA---	85	0
A_G1OH9PT01EMK4C	---NA---	68	0
A_G1OH9PT01DP1VX	---NA---	166	0
A_G1OH9PT01DTLL6	---NA---	50	0
A_G1OH9PT01DYR57	---NA---	76	0
A_G1OH9PT01DQCJA	---NA---	60	0
A_G1OH9PT01DGHZ0	---NA---	187	0
A_G1OH9PT01EXH2S	myosin heavy chain	131	20	1.6935e-07	0.769
A_G1OH9PT01EXXQU	---NA---	132	0
A_G1OH9PT01EYINW	---NA---	61	0
A_G1OH9PT01A1HR6	---NA---	126	0
A_G1OH9PT01BFUC5	---NA---	62	0
A_G1OH9PT01E0WOP	---NA---	242	0
A_G1OH9PT01CJOJH	---NA---	50	0
A_G1OH9PT01BO9Y2	---NA---	167	0
A_G1OH9PT01EEO5K	---NA---	157	0
A_G1OH9PT01DPEFF	---NA---	139	0
A_G1OH9PT01BQWH2	---NA---	139	0
A_G1OH9PT01DK2AC	---NA---	57	0
A_G1OH9PT01CJ7MJ	---NA---	59	0
A_G1OH9PT01BEDRB	cytoplasmic actin 4	187	1	1.70475e-06	0.95
A_G1OH9PT01AWQAJ	---NA---	123	0
A_G1OH9PT01AXVWC	---NA---	54	0
A_G1OH9PT01A8HW3	---NA---	76	0
A_G1OH9PT01C8LEV	---NA---	122	0
A_G1OH9PT01CK0OA	---NA---	143	0
A_G1OH9PT01EQKJ7	---NA---	91	0
A_G1OH9PT01CDPF5	---NA---	59	0
A_G1OH9PT01BR1V1	---NA---	117	0
A_G1OH9PT01AIX2O	---NA---	151	0
A_G1OH9PT01CSU0K	---NA---	74	0
A_G1OH9PT01CS494	---NA---	54	0
A_G1OH9PT01EPWN8	hypothetical protein SORBIDRAFT_05g016477 [Sorghum bicolor]	198	17	3.28203e-15	0.857059
A_G1OH9PT01BUSJ6	---NA---	259	0
A_G1OH9PT01CUMD9	beta-actin	163	20	2.0628e-17	0.9285
A_G1OH9PT01E0W23	---NA---	54	0
A_G1OH9PT01C7F96	---NA---	108	0
A_G1OH9PT01DRXSD	---NA---	84	0
A_G1OH9PT01DLXSV	---NA---	149	0
A_G1OH9PT01EUOKZ	---NA---	206	0
A_G1OH9PT01B8Z52	---NA---	272	0
A_G1OH9PT01DEC0Z	---NA---	74	0
A_G1OH9PT01EX07V	---NA---	351	0
A_G1OH9PT01C0K3R	---NA---	153	0
A_G1OH9PT01DNJLY	---NA---	58	0
A_G1OH9PT01EGJ7P	protein	167	20	3.40854e-12	0.7485
A_G1OH9PT01C2XCV	---NA---	57	0
A_G1OH9PT01DVPQF	---NA---	283	0
A_G1OH9PT01DYJJ4	---NA---	164	0
A_G1OH9PT01C1D8B	---NA---	67	0
A_G1OH9PT01BAQ5D	---NA---	112	0
A_G1OH9PT01DYCUC	zinc finger protein 347-like	270	20	9.21851e-08	0.552
A_G1OH9PT01BUVPS	---NA---	225	0
A_G1OH9PT01ED07X	---NA---	137	0
A_G1OH9PT01BUDSP	---NA---	137	0
A_G1OH9PT01DZTYQ	---NA---	57	0
A_G1OH9PT01E01JA	---NA---	143	0
A_G1OH9PT01EPSB8	---NA---	80	0
A_G1OH9PT01CRU44	---NA---	144	0
A_G1OH9PT01BHEAH	---NA---	175	0
A_G1OH9PT01D7C1K	---NA---	306	0
A_G1OH9PT01DMR89	---NA---	79	0
A_G1OH9PT01CT8RV	---NA---	168	0
A_G1OH9PT01DNEDL	---NA---	57	0
A_G1OH9PT01C0WWB	---NA---	64	0
A_G1OH9PT01BG4NJ	---NA---	127	0
A_G1OH9PT01C3P82	---NA---	220	0
A_G1OH9PT01DVJ5E	---NA---	82	0
A_G1OH9PT01DTKLA	---NA---	147	0
A_G1OH9PT01C8UK6	---NA---	195	0
A_G1OH9PT01EPWTX	---NA---	53	0
A_G1OH9PT01BCVME	---NA---	210	0
A_G1OH9PT01AKXQ3	---NA---	53	0
A_G1OH9PT01CR4Y1	---NA---	200	0
A_G1OH9PT01BIK6R	---NA---	252	0
A_G1OH9PT01DV6ER	---NA---	219	0
A_G1OH9PT01DCRJ0	---NA---	177	0
A_G1OH9PT01DW9G5	---NA---	76	0
A_G1OH9PT01EB5CV	---NA---	240	0
A_G1OH9PT01EVRYC	---NA---	217	0
A_G1OH9PT01BLA0F	---NA---	141	0
A_G1OH9PT01ECF53	---NA---	109	0
A_G1OH9PT01CZHU6	---NA---	164	0
A_G1OH9PT01C6HTN	---NA---	58	0
A_G1OH9PT01B4TGC	---NA---	110	0
A_G1OH9PT01APMYW	---NA---	87	0
A_G1OH9PT01A5CGZ	---NA---	54	0
A_G1OH9PT01CCFJX	---NA---	181	0
A_G1OH9PT01EF0T1	---NA---	66	0
A_G1OH9PT01EDGJ2	2-amino-3-ketobutyrate coenzyme a mitochondrial precursor	221	20	1.89616e-35	0.8775
A_G1OH9PT01BU0KQ	---NA---	130	0
A_G1OH9PT01B7LQ0	---NA---	265	0
A_G1OH9PT01C915B	---NA---	72	0
A_G1OH9PT01EDY1H	---NA---	201	0
A_G1OH9PT01DAMHD	---NA---	128	0
A_G1OH9PT01C1T3N	---NA---	115	0
A_G1OH9PT01D2UMN	---NA---	201	0
A_G1OH9PT01EPL4D	---NA---	112	0
A_G1OH9PT01C5VJ3	---NA---	195	0
A_G1OH9PT01A8YC3	homolog precursor	223	20	3.79183e-08	0.673
A_G1OH9PT01EYAUZ	---NA---	55	0
A_G1OH9PT01COV6X	---NA---	245	0
A_G1OH9PT01C3N8I	predicted protein [Nematostella vectensis]	280	2	4.79318e-07	0.55
A_G1OH9PT01B9CX3	---NA---	210	0
A_G1OH9PT01DNQDC	---NA---	203	0
A_G1OH9PT01CR47I	---NA---	202	0
A_G1OH9PT01BP1C6	---NA---	239	0
A_G1OH9PT01EK3LJ	---NA---	301	0
A_G1OH9PT01C2O4Q	---NA---	294	0
A_G1OH9PT01AIB8E	protein	202	20	2.44552e-18	0.8295
A_G1OH9PT01C4BC8	---NA---	177	0
A_G1OH9PT01CY5V1	flavohemoprotein b5	148	9	9.58205e-06	0.665556
A_G1OH9PT01ALMJ7	---NA---	284	0
A_G1OH9PT01CPDUA	sjchgc05322 protein	321	4	8.64881e-06	0.5875
A_G1OH9PT01EBOTC	---NA---	51	0
A_G1OH9PT01ED5CQ	---NA---	166	0
A_G1OH9PT01DWM5X	---NA---	347	0
A_G1OH9PT01BRMX9	---NA---	96	0
A_G1OH9PT01DJ185	---NA---	65	0
A_G1OH9PT01BFF94	---NA---	110	0
A_G1OH9PT01CWTU4	---NA---	353	0
A_G1OH9PT01DJWB8	---NA---	100	0
A_G1OH9PT01BZI4V	retinol dehydrogenase like	201	20	1.46372e-11	0.749
A_G1OH9PT01DT4BZ	---NA---	51	0
A_G1OH9PT01BDQ6L	---NA---	253	0
A_G1OH9PT01BNOGE	---NA---	135	0
A_G1OH9PT01D8D47	---NA---	201	0
A_G1OH9PT01DU7WB	---NA---	57	0
A_G1OH9PT01AT848	---NA---	83	0
A_G1OH9PT01BIXMK	---NA---	166	0
A_G1OH9PT01C6WC4	---NA---	76	0
A_G1OH9PT01AQ54I	---NA---	206	0
A_G1OH9PT01D0UX5	---NA---	149	0
A_G1OH9PT01CUCPO	---NA---	178	0
A_G1OH9PT01DMU42	---NA---	193	0
A_G1OH9PT01BFXRM	---NA---	188	0
A_G1OH9PT01C3TBY	---NA---	270	0
A_G1OH9PT01EFIUE	---NA---	336	0
A_G1OH9PT01DKPDR	---NA---	311	0
A_G1OH9PT01CP4YC	---NA---	163	0
A_G1OH9PT01DAYHV	---NA---	147	0
A_G1OH9PT01D7PCO	---NA---	165	0
A_G1OH9PT01BHBBU	---NA---	67	0
A_G1OH9PT01DW5N9	---NA---	161	0
A_G1OH9PT01C9AP3	---NA---	88	0
A_G1OH9PT01EU2PC	---NA---	176	0
A_G1OH9PT01BMW46	---NA---	64	0
A_G1OH9PT01DA8MI	---NA---	103	0
A_G1OH9PT01BF5AA	---NA---	81	0
A_G1OH9PT01EEBK6	---NA---	365	0
A_G1OH9PT01C5PI4	---NA---	51	0
A_G1OH9PT01DQAGT	---NA---	139	0
A_G1OH9PT01C2HE2	---NA---	225	0
A_G1OH9PT01DOKSL	---NA---	245	0
A_G1OH9PT01CPJ08	---NA---	56	0
A_G1OH9PT01A4OBZ	---NA---	266	0
A_G1OH9PT01DSYWP	---NA---	162	0
A_G1OH9PT01BA8JY	---NA---	136	0
A_G1OH9PT01DV3ZK	---NA---	94	0
A_G1OH9PT01DB968	---NA---	178	0
A_G1OH9PT01A59QM	---NA---	141	0
A_G1OH9PT01D5BA5	---NA---	54	0
A_G1OH9PT01DOT26	---NA---	133	0
A_G1OH9PT01DNJHQ	---NA---	148	0
A_G1OH9PT01EJPA0	---NA---	84	0
A_G1OH9PT01CF0LQ	---NA---	270	0
A_G1OH9PT01B3W4P	cg41536 cg41536- partial	322	5	2.5645e-11	0.662
A_G1OH9PT01CXE4U	---NA---	123	0
A_G1OH9PT01BICB5	---NA---	89	0
A_G1OH9PT01EDA79	---NA---	110	0
A_G1OH9PT01DAA8Z	---NA---	65	0
A_G1OH9PT01C0T6Z	---NA---	344	0
A_G1OH9PT01CNYLG	---NA---	284	0
A_G1OH9PT01E0U8K	---NA---	96	0
A_G1OH9PT01CYVFM	---NA---	199	0
A_G1OH9PT01A2B21	---NA---	58	0
A_G1OH9PT01DX6H8	---NA---	274	0
A_G1OH9PT01B3EFE	---NA---	116	0
A_G1OH9PT01BWO0U	---NA---	104	0
A_G1OH9PT01AHP95	---NA---	66	0
A_G1OH9PT01DY3MO	---NA---	166	0
A_G1OH9PT01DE8T1	---NA---	131	0
A_G1OH9PT01EJ7LW	conserved hypothetical protein [Pediculus humanus corporis]	199	18	2.3822e-19	0.832778
A_G1OH9PT01A6UQL	ubiquitin carboxyl-terminal hydrolase 47	305	20	6.93269e-20	0.65
A_G1OH9PT01ARPHB	---NA---	180	0
A_G1OH9PT01DSP62	---NA---	229	0
A_G1OH9PT01BLB5P	myosin light chain 2	208	20	2.19634e-27	0.8585
A_G1OH9PT01CHVSM	---NA---	282	0
A_G1OH9PT01DHQ1H	---NA---	256	0
A_G1OH9PT01CNR34	---NA---	335	0
A_G1OH9PT01CNP1U	---NA---	231	0
A_G1OH9PT01C2LA5	---NA---	251	0
A_G1OH9PT01AM4T3	---NA---	120	0
A_G1OH9PT01ES1AV	---NA---	187	0
A_G1OH9PT01DAPVD	---NA---	317	0
A_G1OH9PT01AS3DX	---NA---	160	0
A_G1OH9PT01EHZ5O	---NA---	322	0
A_G1OH9PT01BZ3CN	---NA---	56	0
A_G1OH9PT01CYS4K	---NA---	122	0
A_G1OH9PT01DWYR9	---NA---	321	0
A_G1OH9PT01BN0JX	---NA---	133	0
A_G1OH9PT01CLEPD	---NA---	51	0
A_G1OH9PT01B89AL	---NA---	133	0
A_G1OH9PT01CRV9J	myosin heavy chain	131	9	4.6159e-06	0.633333
A_G1OH9PT01CQMVC	---NA---	54	0
A_G1OH9PT01C7D2U	---NA---	56	0
A_G1OH9PT01B9JNT	---NA---	92	0
A_G1OH9PT01D1N74	---NA---	78	0
A_G1OH9PT01DR8OW	---NA---	121	0
A_G1OH9PT01BTMEB	---NA---	79	0
A_G1OH9PT01BN579	---NA---	82	0
A_G1OH9PT01CXRMC	---NA---	104	0
A_G1OH9PT01EGDG1	---NA---	325	0
A_G1OH9PT01DX48F	actin-like protein	273	20	1.11634e-17	0.9145
A_G1OH9PT01A9MUD	---NA---	78	0
A_G1OH9PT01A2L4L	---NA---	112	0
A_G1OH9PT01C4EQI	a disintegrin and metalloproteinase with thrombospondin motifs 14-like	360	2	1.71092e-12	0.8
A_G1OH9PT01B9VIL	---NA---	195	0
A_G1OH9PT01BLTGO	---NA---	149	0
A_G1OH9PT01BKFP6	---NA---	81	0
A_G1OH9PT01C3TZZ	---NA---	55	0
A_G1OH9PT01A9FUA	reverse transcriptase	345	20	2.41557e-10	0.6155
A_G1OH9PT01C34XH	---NA---	213	0
A_G1OH9PT01D2MAD	---NA---	251	0
A_G1OH9PT01B8O9W	---NA---	148	0
A_G1OH9PT01BO874	---NA---	95	0
A_G1OH9PT01APVBP	---NA---	78	0
A_G1OH9PT01C0AXV	---NA---	294	0
A_G1OH9PT01ESJVH	---NA---	189	0
A_G1OH9PT01A73R0	---NA---	128	0
A_G1OH9PT01AZOHN	---NA---	257	0
A_G1OH9PT01DEGWN	ryanodine receptor homologue	133	20	5.57557e-06	0.69
A_G1OH9PT01AJZGS	hypothetical protein DAPPUDRAFT_67127 [Daphnia pulex]	222	20	3.15741e-14	0.7295
A_G1OH9PT01C36ST	---NA---	65	0
A_G1OH9PT01CRV28	wd repeat-containing protein 70	343	20	1.42352e-20	0.677
A_G1OH9PT01CQYPM	---NA---	120	0
A_G1OH9PT01BFD83	---NA---	177	0
A_G1OH9PT01DJ2QE	tigger transposable element derived 1	348	20	3.37885e-42	0.706
A_G1OH9PT01BXORT	---NA---	291	0
A_G1OH9PT01CF2MP	ryanodine receptor homologue	205	20	2.65058e-07	0.581
A_G1OH9PT01EMK4K	hypothetical protein Phum_PHUM590900 [Pediculus humanus corporis]	226	1	3.14416e-08	0.61
A_G1OH9PT01CT5LF	---NA---	137	0
A_G1OH9PT01DEWDC	---NA---	314	0
A_G1OH9PT01A7TT0	---NA---	67	0
A_G1OH9PT01A8RAV	---NA---	301	0
A_G1OH9PT01C7L6G	---NA---	122	0
A_G1OH9PT01AKZMS	---NA---	328	0
A_G1OH9PT01CX4A7	---NA---	109	0
A_G1OH9PT01BY9NP	---NA---	286	0
A_G1OH9PT01CR8OQ	---NA---	225	0
A_G1OH9PT01DMYU5	---NA---	360	0
A_G1OH9PT01BSJDO	---NA---	113	0
A_G1OH9PT01ANE7Y	---NA---	113	0
A_G1OH9PT01A32CN	---NA---	228	0
A_G1OH9PT01C2HVP	myosin heavy nonmuscle or smooth muscle	256	20	9.81462e-25	0.9405
A_G1OH9PT01AIQ5Z	chk1 checkpoint-like protein	265	9	3.12017e-16	0.7
A_G1OH9PT01EWDY5	---NA---	218	0
A_G1OH9PT01A3C9S	---NA---	211	0
A_G1OH9PT01DAL36	---NA---	56	0
A_G1OH9PT01BWYJK	---NA---	324	0
A_G1OH9PT01CQUJK	---NA---	186	0
A_G1OH9PT01BD8SX	---NA---	68	0
A_G1OH9PT01DFL3O	---NA---	165	0
A_G1OH9PT01EOWHQ	---NA---	153	0
A_G1OH9PT01AYCDQ	---NA---	198	0
A_G1OH9PT01EVARS	---NA---	61	0
A_G1OH9PT01EJ28Y	---NA---	114	0
A_G1OH9PT01A6MU3	---NA---	81	0
A_G1OH9PT01DD4CK	sarcoplasmic calcium-binding beta chain	185	20	1.09649e-25	0.8485
A_G1OH9PT01D6M3Q	---NA---	174	0
A_G1OH9PT01C07OU	---NA---	104	0
A_G1OH9PT01BM439	---NA---	134	0
A_G1OH9PT01EI5VJ	---NA---	71	0
A_G1OH9PT01D1M0F	---NA---	57	0
A_G1OH9PT01EA54U	---NA---	187	0
A_G1OH9PT01DCX6M	---NA---	372	0
A_G1OH9PT01BKLF0	---NA---	316	0
A_G1OH9PT01CRSGB	---NA---	51	0
A_G1OH9PT01AZPVV	---NA---	285	0
A_G1OH9PT01A69BG	---NA---	79	0
A_G1OH9PT01B6F9H	---NA---	66	0
A_G1OH9PT01BLFTD	---NA---	293	0
A_G1OH9PT01D0DZZ	---NA---	94	0
A_G1OH9PT01C10T6	arginine kinase	176	6	2.13274e-13	0.703333
A_G1OH9PT01DDZ52	---NA---	79	0
A_G1OH9PT01DRBQD	---NA---	64	0
A_G1OH9PT01DZFIA	---NA---	156	0
A_G1OH9PT01ENAM1	---NA---	285	0
A_G1OH9PT01C0YC9	---NA---	64	0
A_G1OH9PT01BL9SK	---NA---	194	0
A_G1OH9PT01BY9OD	---NA---	67	0
A_G1OH9PT01DX2YR	---NA---	202	0
A_G1OH9PT01CUH4N	---NA---	59	0
A_G1OH9PT01A4I0H	---NA---	130	0
A_G1OH9PT01BMUCY	---NA---	74	0
A_G1OH9PT01EQ59G	---NA---	78	0
A_G1OH9PT01CZSMJ	---NA---	121	0
A_G1OH9PT01COSUQ	---NA---	163	0
A_G1OH9PT01B25LE	---NA---	151	0
A_G1OH9PT01DDTCM	---NA---	123	0
A_G1OH9PT01CBZJJ	---NA---	140	0
A_G1OH9PT01A53SQ	---NA---	56	0
A_G1OH9PT01B5G37	---NA---	71	0
A_G1OH9PT01BNVCS	---NA---	142	0
A_G1OH9PT01ARAGP	---NA---	54	0
A_G1OH9PT01C8OJL	---NA---	73	0
A_G1OH9PT01BSYAP	---NA---	80	0
A_G1OH9PT01BCWOZ	---NA---	60	0
A_G1OH9PT01A1L4Y	---NA---	253	0
A_G1OH9PT01EAT2Y	---NA---	153	0
A_G1OH9PT01EJZZ5	---NA---	105	0
A_G1OH9PT01E17C5	---NA---	67	0
A_G1OH9PT01EJCX2	---NA---	161	0
A_G1OH9PT01CNLHX	---NA---	60	0
A_G1OH9PT01AM8Y5	---NA---	104	0
A_G1OH9PT01CO9TV	---NA---	283	0
A_G1OH9PT01CN5NS	predicted protein [Nematostella vectensis]	302	1	6.09695e-07	0.6
A_G1OH9PT01DXN4C	---NA---	234	0
A_G1OH9PT01EHJEM	---NA---	185	0
A_G1OH9PT01A3RW3	---NA---	50	0
A_G1OH9PT01BA8MP	myosin light chain alkali	104	8	9.58045e-09	0.73375
A_G1OH9PT01DSBS2	---NA---	141	0
A_G1OH9PT01CLDNT	importin 5	268	14	0.000293058	0.57
A_G1OH9PT01CK4J6	hypothetical protein Phum_PHUM590900 [Pediculus humanus corporis]	355	1	1.74734e-08	0.61
A_G1OH9PT01BWMJW	---NA---	61	0
A_G1OH9PT01CBC8E	---NA---	210	0
A_G1OH9PT01AQU5M	---NA---	176	0
A_G1OH9PT01C4SH8	chk1 checkpoint-like protein	264	9	9.97928e-15	0.702222
A_G1OH9PT01D9DCX	---NA---	102	0
A_G1OH9PT01D1C4Z	---NA---	74	0
A_G1OH9PT01EV4YL	---NA---	284	0
A_G1OH9PT01DU7FO	---NA---	69	0
A_G1OH9PT01B34U1	---NA---	231	0
A_G1OH9PT01B45NX	---NA---	198	0
A_G1OH9PT01AZGZG	---NA---	80	0
A_G1OH9PT01DMI2L	---NA---	334	0
A_G1OH9PT01CU867	---NA---	298	0
A_G1OH9PT01B6IPA	---NA---	51	0
A_G1OH9PT01AEA8V	---NA---	73	0
A_G1OH9PT01EV50V	---NA---	127	0
A_G1OH9PT01A6J06	---NA---	217	0
A_G1OH9PT01D38RH	---NA---	53	0
A_G1OH9PT01AKS0V	---NA---	82	0
A_G1OH9PT01EE96Q	---NA---	363	0
A_G1OH9PT01AQN3Z	PREDICTED: hypothetical protein, partial [Bos taurus]	253	20	8.70778e-07	0.6715
A_G1OH9PT01C9IPM	---NA---	134	0
A_G1OH9PT01ET9KV	---NA---	164	0
A_G1OH9PT01EOZM4	---NA---	55	0
A_G1OH9PT01ANR79	---NA---	58	0
A_G1OH9PT01EIZO0	---NA---	322	0
A_G1OH9PT01CSV1D	---NA---	233	0
A_G1OH9PT01CSP54	---NA---	110	0
A_G1OH9PT01C3NXH	calcium-activated potassium channel alpha	266	20	9.18235e-31	0.9625
A_G1OH9PT01CO0LP	---NA---	239	0
A_G1OH9PT01AO9ER	sarcoplasmic calcium-binding beta chain	185	20	1.66538e-27	0.87
A_G1OH9PT01B49AG	---NA---	206	0
A_G1OH9PT01AX7X9	---NA---	148	0
A_G1OH9PT01BVRAF	---NA---	184	0
A_G1OH9PT01DL557	---NA---	93	0
A_G1OH9PT01C4JPL	---NA---	57	0
A_G1OH9PT01DN1T7	---NA---	222	0
A_G1OH9PT01BCYL9	---NA---	374	0
A_G1OH9PT01AOHNX	hypothetical protein DAPPUDRAFT_125127 [Daphnia pulex]	141	2	6.00126e-05	0.75
A_G1OH9PT01C67EM	---NA---	51	0
A_G1OH9PT01DD3PV	---NA---	79	0
A_G1OH9PT01BFJ3K	---NA---	184	0
A_G1OH9PT01DDH1X	myosin light chain	354	20	6.27549e-34	0.933
A_G1OH9PT01DJXKY	---NA---	306	0
A_G1OH9PT01D3AK0	---NA---	164	0
A_G1OH9PT01BEKD7	---NA---	62	0
A_G1OH9PT01ASR4L	---NA---	199	0
A_G1OH9PT01BRKBM	---NA---	54	0
A_G1OH9PT01ECHXD	---NA---	79	0
A_G1OH9PT01CJBYO	---NA---	57	0
A_G1OH9PT01DQM49	actin	288	20	2.34031e-12	0.607
A_G1OH9PT01B95XS	---NA---	62	0
A_G1OH9PT01AJ2EW	phosphatidylinositol glycan anchor class p	303	20	4.71568e-09	0.76
A_G1OH9PT01A8OTJ	---NA---	106	0
A_G1OH9PT01CN8HC	---NA---	133	0
A_G1OH9PT01EMFK9	---NA---	130	0
A_G1OH9PT01EA48P	---NA---	59	0
A_G1OH9PT01C1A2A	---NA---	93	0
A_G1OH9PT01ETU2L	---NA---	249	0
A_G1OH9PT01EU06F	---NA---	70	0
A_G1OH9PT01ERZ9V	---NA---	61	0
A_G1OH9PT01CO3Y2	---NA---	243	0
A_G1OH9PT01BALJE	conserved hypothetical protein [Pediculus humanus corporis]	198	18	2.38185e-19	0.807778
A_G1OH9PT01D12UN	---NA---	321	0
A_G1OH9PT01C89C7	---NA---	307	0
A_G1OH9PT01A424C	---NA---	229	0
A_G1OH9PT01BB6FD	---NA---	195	0
A_G1OH9PT01EN46F	---NA---	290	0
A_G1OH9PT01A96PN	---NA---	142	0
A_G1OH9PT01CXIGT	---NA---	210	0
A_G1OH9PT01EO1I7	allantoicase	371	20	1.62142e-18	0.642
A_G1OH9PT01BUOWQ	---NA---	203	0
A_G1OH9PT01EKUDS	---NA---	74	0
A_G1OH9PT01C7MYJ	---NA---	51	0
A_G1OH9PT01CBQ5M	---NA---	50	0
A_G1OH9PT01DIWY5	---NA---	109	0
A_G1OH9PT01CPPG9	sarcoplasmic calcium-binding beta chain	185	20	1.66562e-27	0.87
A_G1OH9PT01DVG8W	---NA---	179	0
A_G1OH9PT01B380Z	---NA---	86	0
A_G1OH9PT01AJ0AN	---NA---	181	0
A_G1OH9PT01EDTFH	---NA---	70	0
A_G1OH9PT01BIE9V	---NA---	62	0
A_G1OH9PT01BZ1CZ	---NA---	322	0
A_G1OH9PT01D2ZXX	---NA---	138	0
A_G1OH9PT01APP43	---NA---	225	0
A_G1OH9PT01CS9YR	---NA---	74	0
A_G1OH9PT01D41QM	---NA---	109	0
A_G1OH9PT01CGDIA	---NA---	350	0
A_G1OH9PT01CL0A1	---NA---	81	0
A_G1OH9PT01DZ4HG	---NA---	50	0
A_G1OH9PT01D82VB	---NA---	92	0
A_G1OH9PT01A8RUB	---NA---	179	0
A_G1OH9PT01ELARM	---NA---	50	0
A_G1OH9PT01A8VCS	---NA---	303	0
A_G1OH9PT01B0R48	---NA---	315	0
A_G1OH9PT01BD4VP	---NA---	247	0
A_G1OH9PT01DJ3W5	ac1147-like protein	137	5	0.000127467	0.656
A_G1OH9PT01B2C1Y	---NA---	57	0
A_G1OH9PT01CJ2Q5	---NA---	127	0
A_G1OH9PT01AVIU3	---NA---	208	0
A_G1OH9PT01BWWKR	---NA---	120	0
A_G1OH9PT01C0X6M	---NA---	74	0
A_G1OH9PT01EEM9H	hypothetical protein Bm1_17870 [Brugia malayi]	307	4	2.10397e-15	0.675
A_G1OH9PT01C3OVO	---NA---	242	0
A_G1OH9PT01BHKI9	---NA---	93	0
A_G1OH9PT01D3POP	---NA---	88	0
A_G1OH9PT01BLG8S	---NA---	358	0
A_G1OH9PT01BUW7Q	---NA---	246	0
A_G1OH9PT01BAX2O	---NA---	324	0
A_G1OH9PT01ERW59	---NA---	109	0
A_G1OH9PT01A7CD0	---NA---	131	0
A_G1OH9PT01BA3C9	---NA---	170	0
A_G1OH9PT01CD1QM	---NA---	249	0
A_G1OH9PT01EHANP	---NA---	266	0
A_G1OH9PT01CKPHE	---NA---	362	0
A_G1OH9PT01EL3O5	---NA---	130	0
A_G1OH9PT01C2YIE	---NA---	178	0
A_G1OH9PT01D3AH0	---NA---	149	0
A_G1OH9PT01EEG2V	isoform i	126	20	9.89059e-12	0.81
A_G1OH9PT01EL6HD	---NA---	104	0
A_G1OH9PT01ARKRR	---NA---	284	0
A_G1OH9PT01EII5Q	---NA---	179	0
A_G1OH9PT01AKZ73	arginine kinase	179	20	1.29816e-32	0.7525
A_G1OH9PT01C9JFM	---NA---	148	0
A_G1OH9PT01DQH6I	proteasome activator complex subunit 4	316	20	4.00042e-28	0.811
A_G1OH9PT01ER1MT	sequestosome 1	351	19	1.17584e-09	0.611053
A_G1OH9PT01CBRG2	---NA---	380	0
A_G1OH9PT01EOTVZ	---NA---	130	0
A_G1OH9PT01D9PC3	---NA---	156	0
A_G1OH9PT01EFNVF	---NA---	304	0
A_G1OH9PT01BE89L	zgc:158463 protein	170	20	1.14627e-13	0.901
A_G1OH9PT01BEGAU	---NA---	301	0
A_G1OH9PT01BVVQG	---NA---	233	0
A_G1OH9PT01EEJQ6	---NA---	224	0
A_G1OH9PT01CQA7D	---NA---	61	0
A_G1OH9PT01EMKY7	---NA---	228	0
A_G1OH9PT01DPFB0	---NA---	173	0
A_G1OH9PT01AQ7E1	---NA---	99	0
A_G1OH9PT01CPFUJ	---NA---	57	0
A_G1OH9PT01C3NJJ	---NA---	340	0
A_G1OH9PT01AGXN6	---NA---	123	0
A_G1OH9PT01A2J1M	---NA---	82	0
A_G1OH9PT01EJ1RQ	---NA---	244	0
A_G1OH9PT01APUOI	---NA---	164	0
A_G1OH9PT01DPNDX	---NA---	290	0
A_G1OH9PT01AX74F	hypothetical protein SORBIDRAFT_1180s002020 [Sorghum bicolor]	165	1	3.10746e-06	0.72
A_G1OH9PT01CKZ5I	---NA---	161	0
A_G1OH9PT01A0CPI	---NA---	162	0
A_G1OH9PT01BMZYB	---NA---	59	0
A_G1OH9PT01B70YU	---NA---	347	0
A_G1OH9PT01CZIEU	---NA---	332	0
A_G1OH9PT01CH630	---NA---	221	0
A_G1OH9PT01D0PSQ	---NA---	58	0
A_G1OH9PT01EYLSF	---NA---	224	0
A_G1OH9PT01DH2BS	cytoplasmic 2	351	11	1.54201e-06	0.683636
A_G1OH9PT01CEDH2	---NA---	60	0
A_G1OH9PT01BBEAI	---NA---	72	0
A_G1OH9PT01A5U5V	---NA---	77	0
A_G1OH9PT01DS4HM	kiaa1370 protein	374	20	1.27483e-32	0.6055
A_G1OH9PT01DWFVL	phosphatidylinositol glycan anchor class partial	124	1	0.000739804	0.68
A_G1OH9PT01DTZ1T	---NA---	132	0
A_G1OH9PT01EWSKG	---NA---	236	0
A_G1OH9PT01D4H70	---NA---	125	0
A_G1OH9PT01A4F21	myosin light chain	322	20	4.36339e-28	0.8365
A_G1OH9PT01DW2KO	---NA---	120	0
A_G1OH9PT01DTK5S	acyl-coenzyme a long chain	370	20	1.20073e-51	0.8465
A_G1OH9PT01EV8M0	---NA---	180	0
A_G1OH9PT01AQD59	---NA---	56	0
A_G1OH9PT01CUGI8	---NA---	353	0
A_G1OH9PT01DM4IH	---NA---	89	0
A_G1OH9PT01EZQFE	---NA---	187	0
A_G1OH9PT01D4QMW	---NA---	50	0
A_G1OH9PT01EC9MH	zgc:158463 protein	286	20	3.04617e-17	0.842
A_G1OH9PT01EIGED	---NA---	50	0
A_G1OH9PT01CI83H	---NA---	195	0
A_G1OH9PT01D4G2T	---NA---	359	0
A_G1OH9PT01ADK0X	---NA---	273	0
A_G1OH9PT01CH862	---NA---	190	0
A_G1OH9PT01EVYDS	---NA---	169	0
A_G1OH9PT01B3P9K	ac1147-like protein	217	20	2.14257e-22	0.831
A_G1OH9PT01CSSGT	---NA---	340	0
A_G1OH9PT01DBM1Y	---NA---	58	0
A_G1OH9PT01AYX4V	---NA---	61	0
A_G1OH9PT01BKQDD	---NA---	163	0
A_G1OH9PT01B0NVU	---NA---	140	0
A_G1OH9PT01CLOEM	---NA---	298	0
A_G1OH9PT01AY5XD	---NA---	55	0
A_G1OH9PT01BV6JK	---NA---	54	0
A_G1OH9PT01BS455	---NA---	53	0
A_G1OH9PT01A8AIR	---NA---	204	0
A_G1OH9PT01CV90B	---NA---	51	0
A_G1OH9PT01CZEK3	---NA---	130	0
A_G1OH9PT01EA88H	---NA---	63	0
A_G1OH9PT01CF4GT	---NA---	154	0
A_G1OH9PT01DX2E0	arginine kinase	152	1	3.13661e-07	0.75
A_G1OH9PT01BWPE9	---NA---	253	0
A_G1OH9PT01DQTKD	---NA---	125	0
A_G1OH9PT01D61NB	---NA---	236	0
A_G1OH9PT01BLW5A	---NA---	105	0
A_G1OH9PT01D0T59	---NA---	116	0
A_G1OH9PT01B1TTE	---NA---	161	0
A_G1OH9PT01EL38N	snf2-family atp dependent chromatin remodeling factor snf21	233	6	8.01532e-05	0.51
A_G1OH9PT01DJDZC	---NA---	71	0
A_G1OH9PT01BVPDW	---NA---	85	0
A_G1OH9PT01ATZSH	---NA---	181	0
A_G1OH9PT01E5CPJ	---NA---	98	0
A_G1OH9PT01DTY6O	embryonic polarity protein dorsal	270	20	2.55159e-18	0.867
A_G1OH9PT01D4740	---NA---	119	0
A_G1OH9PT01DJ9RI	---NA---	336	0
A_G1OH9PT01CW58H	---NA---	221	0
A_G1OH9PT01B3N8V	---NA---	116	0
A_G1OH9PT01EO22L	---NA---	280	0
A_G1OH9PT01CRQKD	---NA---	208	0
A_G1OH9PT01BXEM3	---NA---	158	0
A_G1OH9PT01COZBO	---NA---	161	0
A_G1OH9PT01A200O	---NA---	231	0
A_G1OH9PT01COQQT	hypothetical protein Bm1_28695 [Brugia malayi]	250	3	2.97422e-11	0.726667
A_G1OH9PT01APOS9	---NA---	274	0
A_G1OH9PT01AFQUG	---NA---	92	0
A_G1OH9PT01BZ7I8	---NA---	279	0
A_G1OH9PT01DFCJQ	---NA---	359	0
A_G1OH9PT01E0P7H	---NA---	61	0
A_G1OH9PT01CW7BF	---NA---	152	0
A_G1OH9PT01EKUEE	---NA---	57	0
A_G1OH9PT01BRB2H	cyclin-dependent kinase inhibitor 1c ( kip2)	385	20	1.39696e-10	0.693
A_G1OH9PT01EX6PT	zgc:158463 protein	332	20	3.54035e-36	0.8095
A_G1OH9PT01C5FIN	sarcoplasmic calcium-binding protein	227	11	3.64633e-15	0.956364
A_G1OH9PT01ET80L	---NA---	183	0
A_G1OH9PT01C8T9F	poly (adp-ribose) polymerase member 12	341	12	1.05482e-06	0.469167
A_G1OH9PT01DBQYI	---NA---	392	0
A_G1OH9PT01B60H0	---NA---	324	0
A_G1OH9PT01BR9PP	---NA---	123	0
A_G1OH9PT01AIR79	---NA---	59	0
A_G1OH9PT01A7L67	---NA---	57	0
A_G1OH9PT01AP46C	---NA---	234	0
A_G1OH9PT01CV3VU	---NA---	368	0
A_G1OH9PT01CYSOH	---NA---	100	0
A_G1OH9PT01EZZS4	---NA---	193	0
A_G1OH9PT01AXG94	---NA---	63	0
A_G1OH9PT01E4D13	---NA---	132	0
A_G1OH9PT01D5WVI	---NA---	140	0
A_G1OH9PT01CHUOX	---NA---	50	0
A_G1OH9PT01D2UA9	---NA---	51	0
A_G1OH9PT01DJZ9E	---NA---	207	0
A_G1OH9PT01CZZ06	---NA---	82	0
A_G1OH9PT01ASSD2	---NA---	92	0
A_G1OH9PT01EAFKJ	10 kda secreted protein	228	1	1.11217e-15	0.91
A_G1OH9PT01EL9OH	---NA---	184	0
A_G1OH9PT01EPF1P	---NA---	68	0
A_G1OH9PT01DP0TP	---NA---	62	0
A_G1OH9PT01D4LS4	---NA---	63	0
A_G1OH9PT01C0TDW	senescence-associated	246	20	3.36128e-14	0.8295
A_G1OH9PT01AESFK	---NA---	341	0
A_G1OH9PT01EKZMW	---NA---	328	0
A_G1OH9PT01AHWO1	---NA---	180	0
A_G1OH9PT01C1SAJ	---NA---	365	0
A_G1OH9PT01BZ1PE	---NA---	253	0
A_G1OH9PT01EIZ0Y	hypothetical protein EAG_01178 [Camponotus floridanus]	199	7	2.42103e-08	0.707143
A_G1OH9PT01DTG7L	---NA---	160	0
A_G1OH9PT01BKUSC	---NA---	120	0
A_G1OH9PT01DX2J0	---NA---	221	0
A_G1OH9PT01DRX9L	---NA---	88	0
A_G1OH9PT01B9I1X	partial	293	20	6.53996e-18	0.7215
A_G1OH9PT01EEE6U	---NA---	333	0
A_G1OH9PT01CDUYW	sarcoplasmic calcium-binding beta chain	185	20	1.66562e-27	0.87
A_G1OH9PT01EZJ5C	---NA---	54	0
A_G1OH9PT01DZAK3	---NA---	59	0
A_G1OH9PT01D4UDE	---NA---	303	0
A_G1OH9PT01BQFNK	---NA---	117	0
A_G1OH9PT01CYN1P	proprotein convertase subtilisin kexin type 4	351	20	9.19551e-15	0.638
A_G1OH9PT01CWZ76	---NA---	102	0
A_G1OH9PT01COB5P	---NA---	172	0
A_G1OH9PT01EHE3K	---NA---	247	0
A_G1OH9PT01CHXVK	leucine-rich transmembrane protein	331	20	1.31381e-06	0.5825
A_G1OH9PT01C6JUJ	---NA---	325	0
A_G1OH9PT01DM66B	---NA---	289	0
A_G1OH9PT01EAXQ8	---NA---	316	0
A_G1OH9PT01AP8MR	---NA---	62	0
A_G1OH9PT01DJL8R	---NA---	242	0
A_G1OH9PT01A0NGP	---NA---	330	0
A_G1OH9PT01ALR47	---NA---	65	0
A_G1OH9PT01DOUAI	---NA---	126	0
A_G1OH9PT01A4U80	---NA---	56	0
A_G1OH9PT01BXKFN	---NA---	267	0
A_G1OH9PT01BZS4B	---NA---	145	0
A_G1OH9PT01DNG8Y	---NA---	63	0
A_G1OH9PT01BLQM6	---NA---	86	0
A_G1OH9PT01EA6JD	---NA---	323	0
A_G1OH9PT01BXY8Q	senescence-associated protein	349	2	3.70952e-16	0.805
A_G1OH9PT01EV9S3	---NA---	74	0
A_G1OH9PT01C53JK	---NA---	339	0
A_G1OH9PT01B22W1	conserved hypothetical protein [Pediculus humanus corporis]	270	6	2.76002e-14	0.686667
A_G1OH9PT01C7JT6	---NA---	141	0
A_G1OH9PT01AIA7Y	---NA---	57	0
A_G1OH9PT01CK4V8	---NA---	67	0
A_G1OH9PT01B6A8U	---NA---	121	0
A_G1OH9PT01CXEFU	t-cell receptor beta chain ana 11	305	20	2.68681e-09	0.594
A_G1OH9PT01C6IJG	---NA---	323	0
A_G1OH9PT01DF7RR	---NA---	349	0
A_G1OH9PT01DABNO	---NA---	136	0
A_G1OH9PT01BVD94	---NA---	310	0
A_G1OH9PT01B044E	---NA---	66	0
A_G1OH9PT01BI5UV	---NA---	139	0
A_G1OH9PT01BUKON	---NA---	66	0
A_G1OH9PT01EVMZI	---NA---	286	0
A_G1OH9PT01D5K5E	ac1147-like protein	335	20	8.15408e-40	0.792
A_G1OH9PT01EE9YE	---NA---	98	0
A_G1OH9PT01AQJKC	---NA---	50	0
A_G1OH9PT01A4ZIH	---NA---	192	0
A_G1OH9PT01BKBH9	---NA---	164	0
A_G1OH9PT01BXBIH	---NA---	305	0
A_G1OH9PT01DPAQ5	hypothetical protein DAPPUDRAFT_321105 [Daphnia pulex]	330	20	1.16355e-13	0.6445
A_G1OH9PT01DEZ3G	---NA---	343	0
A_G1OH9PT01CY5OC	---NA---	97	0
A_G1OH9PT01DGU6V	---NA---	216	0
A_G1OH9PT01ARCLI	---NA---	59	0
A_G1OH9PT01AG0N9	---NA---	319	0
A_G1OH9PT01CPDKW	myosin alkali light chain	125	1	4.43055e-08	0.78
A_G1OH9PT01BBXJ0	---NA---	56	0
A_G1OH9PT01DM1BG	---NA---	259	0
A_G1OH9PT01EBKM2	---NA---	116	0
A_G1OH9PT01AQNG8	---NA---	280	0
A_G1OH9PT01EFLYD	---NA---	66	0
A_G1OH9PT01AV6KE	---NA---	218	0
A_G1OH9PT01BLK7A	---NA---	179	0
A_G1OH9PT01AFNX5	---NA---	110	0
A_G1OH9PT01BEHMN	---NA---	53	0
A_G1OH9PT01CTDPR	---NA---	153	0
A_G1OH9PT01CZJC0	---NA---	107	0
A_G1OH9PT01DOZ9O	---NA---	82	0
A_G1OH9PT01DM4V2	---NA---	142	0
A_G1OH9PT01ERQJN	---NA---	242	0
A_G1OH9PT01ECTRP	---NA---	70	0
A_G1OH9PT01BK7FG	---NA---	317	0
A_G1OH9PT01A48ES	---NA---	363	0
A_G1OH9PT01EJGA1	---NA---	87	0
A_G1OH9PT01DV4J7	---NA---	232	0
A_G1OH9PT01DDDEE	---NA---	119	0
A_G1OH9PT01DSUV1	---NA---	254	0
A_G1OH9PT01DMWYT	---NA---	321	0
A_G1OH9PT01CNLJJ	---NA---	358	0
A_G1OH9PT01DC5T2	---NA---	306	0
A_G1OH9PT01DLGZ8	hypothetical protein SERLA73DRAFT_128186 [Serpula lacrymans var. lacrymans S7.3]	196	8	2.44581e-11	0.7675
A_G1OH9PT01EB1SU	---NA---	317	0
A_G1OH9PT01DB1J6	---NA---	235	0
A_G1OH9PT01AW82O	skeletal muscle actin 6	151	20	2.72193e-22	0.903
A_G1OH9PT01C934I	---NA---	51	0
A_G1OH9PT01ADNAP	---NA---	184	0
A_G1OH9PT01ALVYD	---NA---	118	0
A_G1OH9PT01DZPND	---NA---	345	0
A_G1OH9PT01CIFHU	---NA---	130	0
A_G1OH9PT01BDWZT	---NA---	132	0
A_G1OH9PT01CYLO5	---NA---	67	0
A_G1OH9PT01DSATV	---NA---	182	0
A_G1OH9PT01DS21C	---NA---	163	0
A_G1OH9PT01DN1W6	---NA---	147	0
A_G1OH9PT01DZOHZ	---NA---	52	0
A_G1OH9PT01AYZKC	myosin heavy chain	357	20	4.11796e-15	0.923
A_G1OH9PT01D22QT	---NA---	326	0
A_G1OH9PT01CNRM4	---NA---	306	0
A_G1OH9PT01DQWO9	---NA---	58	0
A_G1OH9PT01AK10W	---NA---	50	0
A_G1OH9PT01AIZU6	---NA---	51	0
A_G1OH9PT01BZ3TY	hypothetical protein BRAFLDRAFT_102103 [Branchiostoma floridae]	329	1	7.76121e-07	0.7
A_G1OH9PT01ELSL3	---NA---	137	0
A_G1OH9PT01B8YRC	---NA---	110	0
A_G1OH9PT01BAV4F	---NA---	231	0
A_G1OH9PT01CBJ5V	---NA---	372	0
A_G1OH9PT01ETXTY	---NA---	175	0
A_G1OH9PT01AMIB1	---NA---	68	0
A_G1OH9PT01DCKII	---NA---	69	0
A_G1OH9PT01BL1F8	---NA---	258	0
A_G1OH9PT01DRSWU	---NA---	95	0
A_G1OH9PT01EOMCE	---NA---	311	0
A_G1OH9PT01CDAYO	---NA---	337	0
A_G1OH9PT01EICBD	phosphotriesterase-related protein	308	20	1.42579e-11	0.687
A_G1OH9PT01CUQCS	---NA---	196	0
A_G1OH9PT01BLJ06	---NA---	89	0
A_G1OH9PT01EHPH7	---NA---	354	0
A_G1OH9PT01CUVJ6	---NA---	274	0
A_G1OH9PT01DQE47	---NA---	161	0
A_G1OH9PT01C9XHV	---NA---	245	0
A_G1OH9PT01DWBW1	---NA---	54	0
A_G1OH9PT01BQFAS		344
A_G1OH9PT01EM3EO	---NA---	226	0
A_G1OH9PT01CTFAG	---NA---	111	0
A_G1OH9PT01EPG4W	acetylglucosaminyl-transferase	344	20	1.39826e-58	0.9455
A_G1OH9PT01BR481	---NA---	199	0
A_G1OH9PT01A2O9S	---NA---	331	0
A_G1OH9PT01A7ETC	---NA---	206	0
A_G1OH9PT01CMMIT	---NA---	334	0
A_G1OH9PT01DXOOW	---NA---	209	0
A_G1OH9PT01AQAGV	minor histocompatibility protein ha-1	208	20	1.20954e-16	0.6435
A_G1OH9PT01BUO3K	---NA---	326	0
A_G1OH9PT01DO1JR	---NA---	132	0
A_G1OH9PT01B6JJZ	---NA---	157	0
A_G1OH9PT01ENV3F	senescence-associated protein	150	7	1.34781e-14	0.801429
A_G1OH9PT01DMXLB	---NA---	309	0
A_G1OH9PT01ALJV5	---NA---	142	0
A_G1OH9PT01CM1PO	---NA---	329	0
A_G1OH9PT01CRIQ9	elegans protein partially confirmed by transcript evidence	363	20	7.00028e-37	0.7905
A_G1OH9PT01CWKX3	---NA---	62	0
A_G1OH9PT01ESPTW	---NA---	245	0
A_G1OH9PT01DDA8J	---NA---	314	0
A_G1OH9PT01C0H1O	---NA---	292	0
A_G1OH9PT01C58CP	---NA---	151	0
A_G1OH9PT01BRSKB	---NA---	132	0
A_G1OH9PT01DDWTH	conserved protein	353	19	7.02959e-13	0.730526
A_G1OH9PT01A3H12	---NA---	154	0
A_G1OH9PT01BV23K	---NA---	85	0
A_G1OH9PT01CMX1C	---NA---	172	0
A_G1OH9PT01B3OH4	troponin t	209	11	0.000194518	0.621818
A_G1OH9PT01AO6S4	---NA---	105	0
A_G1OH9PT01CARXW	---NA---	76	0
A_G1OH9PT01C0D03	---NA---	261	0
A_G1OH9PT01CZ6YV	---NA---	309	0
A_G1OH9PT01A2TO4	---NA---	133	0
A_G1OH9PT01CUHPZ	---NA---	287	0
A_G1OH9PT01AWDJT	---NA---	253	0
A_G1OH9PT01A8BMH	---NA---	80	0
A_G1OH9PT01CIDT1	---NA---	314	0
A_G1OH9PT01DTDJC	---NA---	239	0
A_G1OH9PT01BLXZZ	---NA---	257	0
A_G1OH9PT01BFW4P	---NA---	164	0
A_G1OH9PT01CAAT8	hypothetical protein Phum_PHUM590900 [Pediculus humanus corporis]	230	1	2.92357e-06	0.61
A_G1OH9PT01EQGQP	---NA---	293	0
A_G1OH9PT01AQAZT	soluble nsf attachment protein	350	20	4.95351e-18	0.551
A_G1OH9PT01EFH1X	---NA---	87	0
A_G1OH9PT01CKHPR	---NA---	301	0
A_G1OH9PT01EJH05	---NA---	56	0
A_G1OH9PT01C5MH4	---NA---	162	0
A_G1OH9PT01EQLW7	---NA---	153	0
A_G1OH9PT01D8W3X	conserved hypothetical protein [Pediculus humanus corporis]	199	18	2.48193e-19	0.832778
A_G1OH9PT01CK6AW	---NA---	70	0
A_G1OH9PT01BDUX8	---NA---	355	0
A_G1OH9PT01D4R7I	---NA---	91	0
A_G1OH9PT01B9YGG	nadh dehydrogenase flavoprotein mitochondrial precursor	307	20	5.70919e-19	0.853
A_G1OH9PT01CDDPO	---NA---	65	0
A_G1OH9PT01AWIUR	svil protein	126	20	1.30154e-11	0.8205
A_G1OH9PT01DFCHK	calcium-activated potassium channel alpha chain	268	20	1.78788e-23	0.82
A_G1OH9PT01BU05K	---NA---	207	0
A_G1OH9PT01EM7M0	---NA---	56	0
A_G1OH9PT01BWGVT	---NA---	115	0
A_G1OH9PT01A8Z45	ac1147-like protein	234	20	2.26827e-23	0.772
A_G1OH9PT01AT0KE	---NA---	51	0
A_G1OH9PT01AIZJY	---NA---	58	0
A_G1OH9PT01EYF4Q	---NA---	139	0
A_G1OH9PT01BP0AR	---NA---	184	0
A_G1OH9PT01BMOOG	---NA---	63	0
A_G1OH9PT01DT9UG	platelet-activating factor acetylhydrolase ib subunit gamma	339	20	3.66096e-34	0.793
A_G1OH9PT01DTV2J	---NA---	51	0
A_G1OH9PT01AQKIW	---NA---	94	0
A_G1OH9PT01CSWHW	---NA---	309	0
A_G1OH9PT01APH7Y	---NA---	111	0
A_G1OH9PT01DHFD4	---NA---	50	0
A_G1OH9PT01DNJG8	---NA---	99	0
A_G1OH9PT01BPS7C	---NA---	137	0
A_G1OH9PT01C0Z28	protein	124	15	1.66001e-15	0.809333
A_G1OH9PT01C2002	---NA---	318	0
A_G1OH9PT01B913R	---NA---	132	0
A_G1OH9PT01BMWQZ	---NA---	86	0
A_G1OH9PT01ERA58	---NA---	91	0
A_G1OH9PT01B6C50	---NA---	50	0
A_G1OH9PT01ESDN5	hypothetical protein EAG_01178 [Camponotus floridanus]	333	3	5.2864e-06	0.69
A_G1OH9PT01D91O8	---NA---	387	0
A_G1OH9PT01C1P1N	---NA---	340	0
A_G1OH9PT01B92DR	---NA---	55	0
A_G1OH9PT01BK5SX	---NA---	57	0
A_G1OH9PT01AUR07	---NA---	162	0
A_G1OH9PT01BSKJS	---NA---	127	0
A_G1OH9PT01EIZTZ	---NA---	224	0
A_G1OH9PT01CAMRX	tripartite motif-containing 56	303	18	9.02922e-05	0.65
A_G1OH9PT01BYZQ6	---NA---	246	0
A_G1OH9PT01EKK5V	---NA---	338	0
A_G1OH9PT01BZNMB	xaa-pro aminopeptidase 1	307	20	3.5068e-26	0.838
A_G1OH9PT01AE7PI	---NA---	104	0
A_G1OH9PT01DUMMP	hypothetical protein DAPPUDRAFT_72494 [Daphnia pulex]	205	20	4.59136e-25	0.8125
A_G1OH9PT01C3MUB	---NA---	327	0
A_G1OH9PT01D9ALJ	---NA---	140	0
A_G1OH9PT01CBF7G	---NA---	255	0
A_G1OH9PT01BUDC8	---NA---	242	0
A_G1OH9PT01B3X3W	---NA---	52	0
A_G1OH9PT01BYYAU	---NA---	187	0
A_G1OH9PT01D56LU	---NA---	78	0
A_G1OH9PT01EC4FG	---NA---	75	0
A_G1OH9PT01DOQLH	transposable element p transposase	407	2	0.000403228	0.665
A_G1OH9PT01CUEY9	---NA---	328	0
A_G1OH9PT01CHSTR	---NA---	64	0
A_G1OH9PT01ENW0A	myosin alkali light chain	121	20	5.82007e-19	0.886
A_G1OH9PT01EH7XM	---NA---	366	0
A_G1OH9PT01CYSGJ	sarcoplasmic calcium-binding beta chain	185	20	1.66538e-27	0.87
A_G1OH9PT01BT973	---NA---	193	0
A_G1OH9PT01CLUKN	cell adhesion molecule	368	20	9.04437e-15	0.666
A_G1OH9PT01CLTPV	---NA---	273	0
A_G1OH9PT01EPSGR	---NA---	302	0
A_G1OH9PT01EEHPV	---NA---	55	0
A_G1OH9PT01C80AV	---NA---	90	0
A_G1OH9PT01CCLT7	skeletal muscle actin 6	295	20	5.68451e-21	0.944
A_G1OH9PT01EGPM6	---NA---	313	0
A_G1OH9PT01BS9YH	---NA---	242	0
A_G1OH9PT01B689V	---NA---	61	0
A_G1OH9PT01DMRMU	---NA---	259	0
A_G1OH9PT01A7S01	---NA---	180	0
A_G1OH9PT01DC70Y	---NA---	370	0
A_G1OH9PT01DZNP1	---NA---	316	0
A_G1OH9PT01D7QMC	---NA---	324	0
A_G1OH9PT01AUETJ	---NA---	95	0
A_G1OH9PT01CZAIY	---NA---	344	0
A_G1OH9PT01B2YAK	isoform a	382	11	9.43449e-09	0.750909
A_G1OH9PT01DTIKR	---NA---	129	0
A_G1OH9PT01DIC10	---NA---	380	0
A_G1OH9PT01EYYPJ	---NA---	60	0
A_G1OH9PT01CDXF6	cytoplasmic 2	317	6	5.34012e-05	0.696667
A_G1OH9PT01DT5C9	---NA---	197	0
A_G1OH9PT01BTACW	---NA---	151	0
A_G1OH9PT01CU092	---NA---	64	0
A_G1OH9PT01CTT3R	---NA---	79	0
A_G1OH9PT01DUY5H	---NA---	231	0
A_G1OH9PT01ARDUZ	---NA---	325	0
A_G1OH9PT01BCQG4	---NA---	190	0
A_G1OH9PT01B90G0	---NA---	92	0
A_G1OH9PT01DX6ZZ	sh3 and multiple ankyrin repeat domains protein 3	376	20	1.78911e-38	0.8315
A_G1OH9PT01A01YA	---NA---	51	0
A_G1OH9PT01EMSJS	---NA---	309	0
A_G1OH9PT01EEKWY	---NA---	346	0
A_G1OH9PT01A08XA	protein	276	20	4.65602e-17	0.7665
A_G1OH9PT01AZHJX	---NA---	50	0
A_G1OH9PT01EUURZ	---NA---	178	0
A_G1OH9PT01BK9OG	---NA---	313	0
A_G1OH9PT01DT7FN	---NA---	316	0
A_G1OH9PT01CVWXX	---NA---	291	0
A_G1OH9PT01ENEL8	---NA---	111	0
A_G1OH9PT01D41MK	Hypothetical protein CBG24445 [Caenorhabditis briggsae]	227	2	5.18137e-12	0.91
A_G1OH9PT01CA7K2	---NA---	123	0
A_G1OH9PT01B6YIA	---NA---	227	0
A_G1OH9PT01A0WY1	---NA---	332	0
A_G1OH9PT01B07G5	---NA---	97	0
A_G1OH9PT01EAJPC	isoform g	329	20	4.48165e-33	0.742
A_G1OH9PT01B5UDK	---NA---	331	0
A_G1OH9PT01EGP7A	---NA---	108	0
A_G1OH9PT01DWUP9	---NA---	52	0
A_G1OH9PT01BNPW1	---NA---	187	0
A_G1OH9PT01C2KWZ	---NA---	168	0
A_G1OH9PT01EILAQ	---NA---	154	0
A_G1OH9PT01CYQVY	---NA---	254	0
A_G1OH9PT01B9CXK	---NA---	267	0
A_G1OH9PT01BHI0Z	---NA---	73	0
A_G1OH9PT01BHEUB	---NA---	106	0
A_G1OH9PT01CXHAJ	ubiquitin carboxyl-terminal hydrolase 47	305	20	5.5804e-17	0.63
A_G1OH9PT01DGFD5	---NA---	338	0
A_G1OH9PT01E2M9C	---NA---	74	0
A_G1OH9PT01A8Z3V		323
A_G1OH9PT01EOAL1	isoform g	179	20	5.83136e-17	0.894
A_G1OH9PT01EZB1G	---NA---	305	0
A_G1OH9PT01DFDKS	---NA---	321	0
A_G1OH9PT01ECUMB	---NA---	257	0
A_G1OH9PT01D3CJ5	---NA---	129	0
A_G1OH9PT01EN5DG	---NA---	58	0
A_G1OH9PT01B2ODY	---NA---	348	0
A_G1OH9PT01ECSM3	---NA---	62	0
A_G1OH9PT01ERLF3	sarcoplasmic calcium-binding protein 1	171	20	3.72493e-22	0.805
A_G1OH9PT01CF4NJ	---NA---	68	0
A_G1OH9PT01EMMPU	---NA---	241	0
A_G1OH9PT01EY140	cg3822 cg3822-pa	276	20	8.55944e-24	0.7745
A_G1OH9PT01ALEEB	---NA---	173	0
A_G1OH9PT01EIQ8K	---NA---	239	0
A_G1OH9PT01A7KJT	---NA---	76	0
A_G1OH9PT01EALCC	---NA---	69	0
A_G1OH9PT01B61BF	---NA---	311	0
A_G1OH9PT01DYFCS	---NA---	70	0
A_G1OH9PT01CCXJZ	---NA---	336	0
A_G1OH9PT01EZXRH	---NA---	220	0
A_G1OH9PT01CLTFD	---NA---	87	0
A_G1OH9PT01BGKOA	---NA---	151	0
A_G1OH9PT01EDSQO	---NA---	206	0
A_G1OH9PT01A4SAW	tumor endothelial marker 7	330	20	1.13546e-13	0.89
A_G1OH9PT01EHY2V	---NA---	58	0
A_G1OH9PT01D4O0I	---NA---	51	0
A_G1OH9PT01D8D43	myosin heavy chain	203	20	2.15502e-16	0.9205
A_G1OH9PT01CVVGG	---NA---	136	0
A_G1OH9PT01EY4XS	---NA---	164	0
A_G1OH9PT01ELRYT	---NA---	152	0
A_G1OH9PT01CKO96	rho gtpase-activating protein 6	392	6	7.62642e-08	0.678333
A_G1OH9PT01DTSUB	---NA---	302	0
A_G1OH9PT01ECD5J	---NA---	62	0
A_G1OH9PT01AX2I6	---NA---	95	0
A_G1OH9PT01A40PM	---NA---	79	0
A_G1OH9PT01AR7WA	---NA---	333	0
A_G1OH9PT01AZDG9	---NA---	64	0
A_G1OH9PT01ENAU7	---NA---	309	0
A_G1OH9PT01EYAYO	---NA---	363	0
A_G1OH9PT01A3XR5	---NA---	299	0
A_G1OH9PT01CGY0A	---NA---	124	0
A_G1OH9PT01BQGMN	---NA---	79	0
A_G1OH9PT01DICE1	ubiquitin-conjugating enzyme e2r	347	20	4.59045e-38	0.988
A_G1OH9PT01D05VK	---NA---	229	0
A_G1OH9PT01C6YB5	---NA---	72	0
A_G1OH9PT01ELZTX	---NA---	107	0
A_G1OH9PT01D3J3Y	---NA---	405	0
A_G1OH9PT01DZ3I1	---NA---	180	0
A_G1OH9PT01AXROQ	---NA---	188	0
A_G1OH9PT01CXLNM	---NA---	81	0
A_G1OH9PT01DBQ5Z	x-prolyl aminopeptidase (aminopeptidase p) soluble	300	20	2.04761e-27	0.7225
A_G1OH9PT01DABXZ	hemocyte protein-glutamine gamma-glutamyltransferase	243	20	1.17809e-38	0.8045
A_G1OH9PT01BJ514	---NA---	269	0
A_G1OH9PT01DUARZ	---NA---	222	0
A_G1OH9PT01CLYK6	---NA---	63	0
A_G1OH9PT01EKCG8	---NA---	58	0
A_G1OH9PT01CY0HY	hypothetical protein Bm1_17870 [Brugia malayi]	361	1	5.25982e-10	0.71
A_G1OH9PT01C0MBB	---NA---	164	0
A_G1OH9PT01DDG1V	---NA---	296	0
A_G1OH9PT01A0IFZ	---NA---	56	0
A_G1OH9PT01EE401	---NA---	190	0
A_G1OH9PT01EXX4Z	---NA---	130	0
A_G1OH9PT01DDDD3	---NA---	362	0
A_G1OH9PT01EZTXR	---NA---	421	0
A_G1OH9PT01A9XWC	---NA---	280	0
A_G1OH9PT01AECYU	hypothetical protein Bm1_17870 [Brugia malayi]	302	1	3.76206e-05	0.75
A_G1OH9PT01A1EPO	---NA---	353	0
A_G1OH9PT01ARX7H	---NA---	141	0
A_G1OH9PT01BNR2Q	---NA---	58	0
A_G1OH9PT01D8QLQ	---NA---	315	0
A_G1OH9PT01CTGA9	---NA---	240	0
A_G1OH9PT01D7F3R	---NA---	77	0
A_G1OH9PT01EG7Z0	---NA---	163	0
A_G1OH9PT01C7MUL	---NA---	207	0
A_G1OH9PT01DKFDP	---NA---	168	0
A_G1OH9PT01D14YT	---NA---	344	0
A_G1OH9PT01EZELC	svil protein	126	20	1.30154e-11	0.8205
A_G1OH9PT01EL558	---NA---	314	0
A_G1OH9PT01DSQ3T	---NA---	244	0
A_G1OH9PT01EGXF6		355
A_G1OH9PT01BU5BJ	---NA---	344	0
A_G1OH9PT01CPNAL	---NA---	133	0
A_G1OH9PT01CRYYZ	---NA---	297	0
A_G1OH9PT01BWP7W	---NA---	225	0
A_G1OH9PT01ENZV7	---NA---	64	0
A_G1OH9PT01CUG3T	---NA---	100	0
A_G1OH9PT01E1LT9	---NA---	141	0
A_G1OH9PT01C9SS7	---NA---	338	0
A_G1OH9PT01BQI86	---NA---	149	0
A_G1OH9PT01ED2PG	sarcoplasmic calcium-binding beta chain	246	20	1.5626e-13	0.9575
A_G1OH9PT01CYJGU	arginine kinase	144	20	8.23965e-25	0.762
A_G1OH9PT01CBHE5	---NA---	334	0
A_G1OH9PT01EIE65	---NA---	232	0
A_G1OH9PT01DM5LO	chk1 checkpoint-like protein	311	13	1.14242e-17	0.74
A_G1OH9PT01CVSO8	---NA---	107	0
A_G1OH9PT01DWWOM	cytosolic manganese superoxide dismutase	273	20	7.02804e-18	0.713
A_G1OH9PT01D6RFH	---NA---	182	0
A_G1OH9PT01DMN36	---NA---	92	0
A_G1OH9PT01C5P48	---NA---	179	0
A_G1OH9PT01CTWDS	---NA---	141	0
A_G1OH9PT01EC79K	---NA---	95	0
A_G1OH9PT01E4G5E	---NA---	283	0
A_G1OH9PT01EMZKP	lipid transfer protein precursor	131	1	0.000230649	0.61
A_G1OH9PT01C6MUX	---NA---	385	0
A_G1OH9PT01ETWUN	---NA---	294	0
A_G1OH9PT01BCA5D	---NA---	324	0
A_G1OH9PT01EV3CZ	---NA---	167	0
A_G1OH9PT01EAHQ4	---NA---	169	0
A_G1OH9PT01DXUVP	---NA---	282	0
A_G1OH9PT01EQLYK	---NA---	158	0
A_G1OH9PT01EDUJU	---NA---	328	0
A_G1OH9PT01DRIRS	---NA---	381	0
A_G1OH9PT01AIKYD	---NA---	215	0
A_G1OH9PT01CZQXT	---NA---	77	0
A_G1OH9PT01AD07L	---NA---	177	0
A_G1OH9PT01ENLE3	---NA---	293	0
A_G1OH9PT01CP0GB	---NA---	340	0
A_G1OH9PT01EAJVB	---NA---	231	0
A_G1OH9PT01ELNON	---NA---	266	0
A_G1OH9PT01C11XS	---NA---	316	0
A_G1OH9PT01AY483	---NA---	181	0
A_G1OH9PT01B0SUA	---NA---	174	0
A_G1OH9PT01ELA5G	---NA---	270	0
A_G1OH9PT01BIQ16	---NA---	116	0
A_G1OH9PT01CF8LG	---NA---	215	0
A_G1OH9PT01EJFPQ	---NA---	81	0
A_G1OH9PT01ED79A	---NA---	248	0
A_G1OH9PT01AG2WP	---NA---	118	0
A_G1OH9PT01AXEVH	---NA---	260	0
A_G1OH9PT01ANY21	---NA---	256	0
A_G1OH9PT01CSF45	---NA---	84	0
A_G1OH9PT01DHWDL	---NA---	327	0
A_G1OH9PT01A5W8W	isoform g	179	20	5.83136e-17	0.894
A_G1OH9PT01EGWI9	---NA---	149	0
A_G1OH9PT01EIARA	actin actin like protein	291	20	2.39476e-15	0.57
A_G1OH9PT01BVT9M	ac1147-like protein	241	20	1.67115e-13	0.59
A_G1OH9PT01CAVAT	fumarate hydratase	305	20	3.77594e-23	0.7985
A_G1OH9PT01DEPWI	---NA---	62	0
A_G1OH9PT01EERZ5	---NA---	292	0
A_G1OH9PT01D3BMA	---NA---	320	0
A_G1OH9PT01CBEKJ	---NA---	342	0
A_G1OH9PT01EMQ7G	gag-pol polyprotein	341	20	2.8793e-14	0.5875
A_G1OH9PT01B790U	chk1 checkpoint-like protein	265	13	7.29776e-15	0.715385
A_G1OH9PT01DWKOH	---NA---	109	0
A_G1OH9PT01DJQT0	alpha-aminoadipic semialdehyde mitochondrial	216	20	5.40228e-25	0.8545
A_G1OH9PT01DNUJR	---NA---	254	0
A_G1OH9PT01EX4WN	---NA---	61	0
A_G1OH9PT01DWMEV	---NA---	281	0
A_G1OH9PT01AGAZW	---NA---	175	0
A_G1OH9PT01A7DIJ	CDH1-D [Gallus gallus]	287	1	8.8113e-06	0.76
A_G1OH9PT01CEV0O	---NA---	56	0
A_G1OH9PT01ESPE3	---NA---	143	0
A_G1OH9PT01CELY1	---NA---	369	0
A_G1OH9PT01ELZS6	---NA---	87	0
A_G1OH9PT01BGVCQ	---NA---	120	0
A_G1OH9PT01CLSGI	---NA---	281	0
A_G1OH9PT01A8A8Q	hypothetical protein Bm1_07600 [Brugia malayi]	233	1	0.000192832	0.63
A_G1OH9PT01D7U9H	---NA---	366	0
A_G1OH9PT01BGWRF	partial	297	15	1.38474e-16	0.676
A_G1OH9PT01CXP26	---NA---	199	0
A_G1OH9PT01EF7N6	---NA---	295	0
A_G1OH9PT01DQ9YU	---NA---	284	0
A_G1OH9PT01BZ5DB	---NA---	200	0
A_G1OH9PT01EEWLU	---NA---	63	0
A_G1OH9PT01D360W	sperm mitochondria-associated cysteine-rich protein	325	20	4.6645e-07	0.5695
A_G1OH9PT01EO8DZ	---NA---	69	0
A_G1OH9PT01BYHNT	---NA---	352	0
A_G1OH9PT01DJJ2I	---NA---	258	0
A_G1OH9PT01BB3I7	---NA---	286	0
A_G1OH9PT01BB5RK	---NA---	398	0
A_G1OH9PT01BG61A	---NA---	59	0
A_G1OH9PT01DK9DL	---NA---	63	0
A_G1OH9PT01CKRXD	---NA---	91	0
A_G1OH9PT01EOERZ	hypothetical protein EAG_01178 [Camponotus floridanus]	333	3	5.2864e-06	0.69
A_G1OH9PT01A3C6S	---NA---	163	0
A_G1OH9PT01DA0TH	---NA---	308	0
A_G1OH9PT01EFG6J	---NA---	60	0
A_G1OH9PT01CE1VG	---NA---	181	0
A_G1OH9PT01A3HU6	---NA---	304	0
A_G1OH9PT01AROXM	---NA---	330	0
A_G1OH9PT01C3JRM	---NA---	349	0
A_G1OH9PT01BW9GR	scpa_pensp ame: full=sarcoplasmic calcium-binding alpha-b and -a chains short=scp alpha chain	370	3	5.60377e-05	0.776667
A_G1OH9PT01DUQ9S	---NA---	124	0
A_G1OH9PT01EVVCO	---NA---	50	0
A_G1OH9PT01DSGST	mitochondrial ribonuclease p protein 3-like	392	16	4.11644e-08	0.588125
A_G1OH9PT01AJPE6	---NA---	53	0
A_G1OH9PT01CRMUC	hypothetical protein Phum_PHUM590900 [Pediculus humanus corporis]	355	1	1.74734e-08	0.61
A_G1OH9PT01B39C2	sugar hydrolase	279	1	0.00013296	0.57
A_G1OH9PT01B27OW	---NA---	325	0
A_G1OH9PT01DOD4X	---NA---	101	0
A_G1OH9PT01BXXYB	---NA---	55	0
A_G1OH9PT01DWGDW	t-complex protein 1 subunit gamma-like isoform 2	266	20	4.79954e-40	0.8795
A_G1OH9PT01DILZ0	protein pat1-like protein 1	323	15	1.20549e-09	0.584
A_G1OH9PT01B4PUF	---NA---	78	0
A_G1OH9PT01DO9UR	---NA---	67	0
A_G1OH9PT01B0IZY	mannose-6-phosphate receptor (cation dependent)	259	14	6.15039e-08	0.554286
A_G1OH9PT01BYL8O	---NA---	173	0
A_G1OH9PT01BTNQU	---NA---	318	0
A_G1OH9PT01DW922	protein	119	15	1.52009e-15	0.811333
A_G1OH9PT01BY05L	---NA---	184	0
A_G1OH9PT01D92N2	---NA---	231	0
A_G1OH9PT01EVGU7	actin 1	190	20	2.59974e-23	0.9425
A_G1OH9PT01DAGKO	---NA---	128	0
A_G1OH9PT01BWP91	---NA---	321	0
A_G1OH9PT01BLX43	---NA---	185	0
A_G1OH9PT01DHLHG	arginine kinase	169	6	7.63479e-15	0.866667
A_G1OH9PT01APFO2	cre-myo-2 protein	119	20	0.000357885	0.925
A_G1OH9PT01DWD1W	---NA---	64	0
A_G1OH9PT01AJ5F8	---NA---	180	0
A_G1OH9PT01CELK3	---NA---	115	0
A_G1OH9PT01CHE3Z	---NA---	72	0
A_G1OH9PT01CAR8A	---NA---	90	0
A_G1OH9PT01CUNAY	---NA---	62	0
A_G1OH9PT01D7704	---NA---	52	0
A_G1OH9PT01C52A5	---NA---	272	0
A_G1OH9PT01AWWLS	---NA---	125	0
A_G1OH9PT01BP4J2	acyl- synthetase family member mitochondrial	331	11	1.48311e-05	0.603636
A_G1OH9PT01BDZW0	---NA---	368	0
A_G1OH9PT01DX7LD	---NA---	182	0
A_G1OH9PT01AEYT2	---NA---	71	0
A_G1OH9PT01AP2MR	---NA---	227	0
A_G1OH9PT01EFH1F	---NA---	55	0
A_G1OH9PT01ENWF5	---NA---	327	0
A_G1OH9PT01C6S2Y	---NA---	290	0
A_G1OH9PT01DX1RS	---NA---	350	0
A_G1OH9PT01CK0J9	---NA---	194	0
A_G1OH9PT01EO3RM	ac1147-like protein	224	6	1.37906e-06	0.641667
A_G1OH9PT01B0ES3	---NA---	103	0
A_G1OH9PT01E4NDZ	---NA---	53	0
A_G1OH9PT01DQ2LU	---NA---	181	0
A_G1OH9PT01CJ6OW	---NA---	101	0
A_G1OH9PT01CAGLE	---NA---	242	0
A_G1OH9PT01EP0U6	---NA---	252	0
A_G1OH9PT01CNBSZ	---NA---	103	0
A_G1OH9PT01A4Y9K	---NA---	52	0
A_G1OH9PT01A9CB9	---NA---	342	0
A_G1OH9PT01AOJA3	---NA---	293	0
A_G1OH9PT01DIOT9	---NA---	118	0
A_G1OH9PT01EWSJB	---NA---	174	0
A_G1OH9PT01A5YFA	---NA---	197	0
A_G1OH9PT01CGSUX	cg41536 cg41536- partial	322	5	2.5648e-11	0.662
A_G1OH9PT01BKEJE	---NA---	53	0
A_G1OH9PT01B7OT6	hypothetical protein EAI_12903 [Harpegnathos saltator]	93	1	3.74114e-05	0.6
A_G1OH9PT01CY1AX	---NA---	60	0
A_G1OH9PT01A21Q7	---NA---	359	0
A_G1OH9PT01BM0PF	---NA---	244	0
A_G1OH9PT01BM7MN	---NA---	129	0
A_G1OH9PT01ECRHM	succinate dehydrogenase assembly factor mitochondrial-like	355	20	3.01246e-30	0.7765
A_G1OH9PT01A95VE	---NA---	349	0
A_G1OH9PT01D4JD9	---NA---	311	0
A_G1OH9PT01EM086	---NA---	397	0
A_G1OH9PT01B8SL6	senescence-associated protein	226	1	1.55507e-07	0.69
A_G1OH9PT01DILA6	---NA---	315	0
A_G1OH9PT01DXRJQ	hypothetical protein DAPPUDRAFT_67127 [Daphnia pulex]	166	20	4.33568e-14	0.8795
A_G1OH9PT01EL078	sarcoplasmic calcium-binding beta chain	331	20	5.83692e-23	0.825
A_G1OH9PT01DZE6D	---NA---	81	0
A_G1OH9PT01DP9P3	---NA---	248	0
A_G1OH9PT01BMVI7	---NA---	360	0
A_G1OH9PT01D5VWI	hypothetical protein Phum_PHUM590900 [Pediculus humanus corporis]	244	1	1.25202e-06	0.52
A_G1OH9PT01CABIR	---NA---	68	0
A_G1OH9PT01DFOQ0	---NA---	203	0
A_G1OH9PT01B0KW1	---NA---	302	0
A_G1OH9PT01A7V5N	---NA---	78	0
A_G1OH9PT01BJF3O	---NA---	81	0
A_G1OH9PT01CMKOX	---NA---	367	0
A_G1OH9PT01ANF21	hypothetical protein DAPPUDRAFT_73464 [Daphnia pulex]	233	1	0.000942425	0.6
A_G1OH9PT01BB22I	---NA---	60	0
A_G1OH9PT01BWK6F	conserved hypothetical protein [Pediculus humanus corporis]	234	18	4.42652e-18	0.774444
A_G1OH9PT01AYXHP	---NA---	74	0
A_G1OH9PT01C59PS	---NA---	170	0
A_G1OH9PT01DPXM4	---NA---	86	0
A_G1OH9PT01EK5H7	---NA---	371	0
A_G1OH9PT01A83DT	---NA---	264	0
A_G1OH9PT01BOE61	---NA---	73	0
A_G1OH9PT01B2EHM	---NA---	189	0
A_G1OH9PT01EKXO9	ankyrin repeat domain 10	315	20	1.43218e-29	0.646
A_G1OH9PT01CM7FP	hypothetical protein Bm1_11025 [Brugia malayi]	302	3	0.000155368	0.666667
A_G1OH9PT01CNDNQ	---NA---	145	0
A_G1OH9PT01A2OIB	---NA---	61	0
A_G1OH9PT01EHQ5L	---NA---	332	0
A_G1OH9PT01D3Z16	---NA---	329	0
A_G1OH9PT01D36XQ	---NA---	180	0
A_G1OH9PT01AF0I7	---NA---	144	0
A_G1OH9PT01CH05B	---NA---	202	0
A_G1OH9PT01D7AI9	---NA---	354	0
A_G1OH9PT01CQK6X	---NA---	90	0
A_G1OH9PT01BA5X8	---NA---	326	0
A_G1OH9PT01CITPN	---NA---	326	0
A_G1OH9PT01CM1HR	actin-binding lim protein 1	356	20	2.49271e-53	0.914
A_G1OH9PT01ESAG7	---NA---	188	0
A_G1OH9PT01DJY3I	---NA---	268	0
A_G1OH9PT01BI0MO	---NA---	299	0
A_G1OH9PT01DP0D7	---NA---	192	0
A_G1OH9PT01BRTOZ	---NA---	129	0
A_G1OH9PT01DVGDF	---NA---	115	0
A_G1OH9PT01EP6S9	spermatogenesis-associated protein 2	300	12	5.60472e-15	0.625833
A_G1OH9PT01D3PQ7	---NA---	419	0
A_G1OH9PT01C7P7I	---NA---	183	0
A_G1OH9PT01EBPV7	proteasome subunit alpha type-3	336	20	1.3921e-16	0.701
A_G1OH9PT01COBYH	sarcoplasmic calcium-binding beta chain	311	20	3.48953e-13	0.9575
A_G1OH9PT01CCEZN	---NA---	132	0
A_G1OH9PT01A745G	---NA---	192	0
A_G1OH9PT01DSKZK	---NA---	409	0
A_G1OH9PT01A7LO3	---NA---	350	0
A_G1OH9PT01CW5DG	dynactin subunit 4 isoform 1	405	20	1.63507e-28	0.727
A_G1OH9PT01BJAK2	---NA---	326	0
A_G1OH9PT01B8D9L	---NA---	68	0
A_G1OH9PT01CIFKJ	---NA---	351	0
A_G1OH9PT01DTNMT	---NA---	285	0
A_G1OH9PT01AOGRL	---NA---	369	0
A_G1OH9PT01DET4J	---NA---	134	0
A_G1OH9PT01AYKGE	---NA---	165	0
A_G1OH9PT01AVIIW	---NA---	62	0
A_G1OH9PT01DZP0V	---NA---	353	0
A_G1OH9PT01B0JDN	---NA---	114	0
A_G1OH9PT01C59PW	---NA---	336	0
A_G1OH9PT01CTCIY	---NA---	164	0
A_G1OH9PT01DFD99	---NA---	350	0
A_G1OH9PT01CSVMP	---NA---	128	0
A_G1OH9PT01COUD5	---NA---	165	0
A_G1OH9PT01AEZVX	---NA---	66	0
A_G1OH9PT01A7BY3	chk1 checkpoint-like protein	194	9	2.18671e-19	0.78
A_G1OH9PT01BZIC9	chk1 checkpoint-like protein	273	9	8.56227e-17	0.716667
A_G1OH9PT01B8EQA	---NA---	375	0
A_G1OH9PT01DMF28	ac1147-like protein	335	20	1.96044e-24	0.917
A_G1OH9PT01A74PT	---NA---	228	0
A_G1OH9PT01D7NVJ	---NA---	52	0
A_G1OH9PT01B82P2	---NA---	309	0
A_G1OH9PT01DKNVO	---NA---	360	0
A_G1OH9PT01CZV8A	---NA---	188	0
A_G1OH9PT01DYNRC	---NA---	380	0
A_G1OH9PT01DY21Q	---NA---	352	0
A_G1OH9PT01DYZDB	---NA---	225	0
A_G1OH9PT01C26KA	hypothetical protein Bm1_02885 [Brugia malayi]	329	20	7.61502e-20	0.7845
A_G1OH9PT01C3MEZ	---NA---	154	0
A_G1OH9PT01A1WET	---NA---	261	0
A_G1OH9PT01C38AZ	---NA---	283	0
A_G1OH9PT01B8YLQ	---NA---	176	0
A_G1OH9PT01EYPR3	---NA---	126	0
A_G1OH9PT01DRMFL	hypothetical protein VOLCADRAFT_102187 [Volvox carteri f. nagariensis]	359	2	0.000443061	0.62
A_G1OH9PT01CMGK2	---NA---	301	0
A_G1OH9PT01CTU25	---NA---	179	0
A_G1OH9PT01BWP0M	---NA---	346	0
A_G1OH9PT01C1713	---NA---	352	0
A_G1OH9PT01CG2CI	---NA---	147	0
A_G1OH9PT01BKPFE	---NA---	328	0
A_G1OH9PT01BQ0HI	---NA---	63	0
A_G1OH9PT01BX1FJ	ubiquitin carboxyl-terminal hydrolase 5	315	20	2.57415e-23	0.7515
A_G1OH9PT01D1IW5	---NA---	203	0
A_G1OH9PT01DWUHT	soluble nsf attachment protein	311	20	7.66438e-10	0.807
A_G1OH9PT01B9QIO	probable atp-dependent rna helicase dhx34	322	20	1.1162e-08	0.5385
A_G1OH9PT01A2FHU	---NA---	72	0
A_G1OH9PT01AQE60	---NA---	297	0
A_G1OH9PT01CGMKG	protein	350	20	3.19007e-16	0.7445
A_G1OH9PT01BUEOM	organic cation transporter protein	358	20	4.27685e-21	0.584
A_G1OH9PT01A1CZU	---NA---	177	0
A_G1OH9PT01EMDP4	---NA---	355	0
A_G1OH9PT01EKT3J	---NA---	315	0
A_G1OH9PT01C3ZDK	PREDICTED: similar to ENSANGP00000011865 [Nasonia vitripennis]	366	20	4.26813e-23	0.86
A_G1OH9PT01C3Z90	---NA---	85	0
A_G1OH9PT01EVDD5	sarcoplasmic calcium-binding beta chain	176	14	7.98209e-10	0.710714
A_G1OH9PT01B7FCW	---NA---	321	0
A_G1OH9PT01AL910	---NA---	142	0
A_G1OH9PT01CHNTC	---NA---	66	0
A_G1OH9PT01C9KIE	myosin light chain	220	6	3.76311e-14	0.806667
A_G1OH9PT01CQ7SE	---NA---	294	0
A_G1OH9PT01EUK4O	---NA---	105	0
A_G1OH9PT01CRQ6K	---NA---	142	0
A_G1OH9PT01DFF7I	---NA---	110	0
A_G1OH9PT01COG04	---NA---	206	0
A_G1OH9PT01BH2EU	---NA---	375	0
A_G1OH9PT01BMMWX	---NA---	268	0
A_G1OH9PT01AW8ML	---NA---	330	0
A_G1OH9PT01BRCRZ	---NA---	303	0
A_G1OH9PT01A3FDY	---NA---	312	0
A_G1OH9PT01EE913	---NA---	210	0
A_G1OH9PT01ETUBA	---NA---	228	0
A_G1OH9PT01D354O	---NA---	51	0
A_G1OH9PT01A3CFN	---NA---	138	0
A_G1OH9PT01ANI3H	---NA---	229	0
A_G1OH9PT01DWQ82	---NA---	299	0
A_G1OH9PT01D7XH9	myosin heavy nonmuscle or smooth muscle	345	20	2.97707e-11	0.5475
A_G1OH9PT01DXJEJ	---NA---	268	0
A_G1OH9PT01DCB3V	---NA---	163	0
A_G1OH9PT01CXVAZ	---NA---	223	0
A_G1OH9PT01DW0I9	---NA---	195	0
A_G1OH9PT01C04YF	---NA---	269	0
A_G1OH9PT01EWVLM	---NA---	349	0
A_G1OH9PT01B97WV	---NA---	263	0
A_G1OH9PT01APDBK	---NA---	56	0
A_G1OH9PT01BD4X3	---NA---	153	0
A_G1OH9PT01CEPLL	---NA---	127	0
A_G1OH9PT01D579H	---NA---	162	0
A_G1OH9PT01BFLP7	---NA---	149	0
A_G1OH9PT01EI9OM	vacuolar protein sorting protein 18	337	20	8.53187e-17	0.721
A_G1OH9PT01B82GN	---NA---	322	0
A_G1OH9PT01EISII	---NA---	57	0
A_G1OH9PT01BFSB2	---NA---	132	0
A_G1OH9PT01EMESC	---NA---	342	0
A_G1OH9PT01DU9YO	---NA---	306	0
A_G1OH9PT01D4D1Q	---NA---	57	0
A_G1OH9PT01EPC4V	aldehyde dehydrogenase	371	20	3.40003e-27	0.7025
A_G1OH9PT01CGIS9	---NA---	332	0
A_G1OH9PT01BGWPT	---NA---	95	0
A_G1OH9PT01B50HQ	---NA---	310	0
A_G1OH9PT01CPFOI	hypothetical protein SORBIDRAFT_05g016477 [Sorghum bicolor]	202	16	4.83007e-15	0.84375
A_G1OH9PT01EVWW2	---NA---	352	0
A_G1OH9PT01C6JSE	---NA---	260	0
A_G1OH9PT01B0C8D	---NA---	222	0
A_G1OH9PT01BLAZ7	---NA---	348	0
A_G1OH9PT01EATY2	---NA---	301	0
A_G1OH9PT01CPHJF	---NA---	70	0
A_G1OH9PT01CD48J	---NA---	146	0
A_G1OH9PT01D7O4I	---NA---	63	0
A_G1OH9PT01ERLOW	---NA---	355	0
A_G1OH9PT01AVIMV	---NA---	185	0
A_G1OH9PT01BR8NH	---NA---	310	0
A_G1OH9PT01BCIJ6	---NA---	311	0
A_G1OH9PT01B104Z	---NA---	350	0
A_G1OH9PT01AI1XW	---NA---	108	0
A_G1OH9PT01AJI1T	---NA---	206	0
A_G1OH9PT01E0A8T	---NA---	140	0
A_G1OH9PT01A7BHY	---NA---	252	0
A_G1OH9PT01DMON3	---NA---	356	0
A_G1OH9PT01CD2EY	arginine kinase	249	20	3.46119e-16	0.868
A_G1OH9PT01ET886	10 kda secreted protein	215	1	9.13685e-16	0.91
A_G1OH9PT01AQ92W	talin 1	396	20	3.18462e-19	0.74
A_G1OH9PT01DA2SO	---NA---	287	0
A_G1OH9PT01BHDXR	---NA---	319	0
A_G1OH9PT01C0PH6	---NA---	348	0
A_G1OH9PT01BML4X	---NA---	303	0
A_G1OH9PT01C68PN	---NA---	83	0
A_G1OH9PT01BSF6C	---NA---	237	0
A_G1OH9PT01CSRPX	---NA---	80	0
A_G1OH9PT01CKEP1	---NA---	309	0
A_G1OH9PT01EU9PL	---NA---	95	0
A_G1OH9PT01CQ3CT	chk1 checkpoint-like protein	333	7	1.15683e-14	0.748571
A_G1OH9PT01AVBU7	---NA---	287	0
A_G1OH9PT01EWKBB	---NA---	159	0
A_G1OH9PT01BIXBR	---NA---	56	0
A_G1OH9PT01BJHFL	---NA---	373	0
A_G1OH9PT01AQ3SH	---NA---	169	0
A_G1OH9PT01ECFET	uncharacterized protein	357	20	9.27595e-19	0.5495
A_G1OH9PT01C0JOT	---NA---	246	0
A_G1OH9PT01CQG20	prolyl endopeptidase	241	20	1.09008e-09	0.8585
A_G1OH9PT01BM293	---NA---	202	0
A_G1OH9PT01EKJSY	---NA---	336	0
A_G1OH9PT01C73IO	---NA---	342	0
A_G1OH9PT01ENZ5P	---NA---	314	0
A_G1OH9PT01ESIKE	---NA---	391	0
A_G1OH9PT01DTXB8	---NA---	60	0
A_G1OH9PT01AZG70	---NA---	76	0
A_G1OH9PT01CKB8H	---NA---	353	0
A_G1OH9PT01A674R	---NA---	173	0
A_G1OH9PT01BIY5N	---NA---	80	0
A_G1OH9PT01BVW58	---NA---	301	0
A_G1OH9PT01DVELY	phosphatidylinositol glycan anchor class p	310	20	1.13515e-12	0.7055
A_G1OH9PT01CGW6S	---NA---	92	0
A_G1OH9PT01CLQA2	---NA---	204	0
A_G1OH9PT01CKI52	---NA---	163	0
A_G1OH9PT01BIEQ2	---NA---	287	0
A_G1OH9PT01APC4S	---NA---	197	0
A_G1OH9PT01EIWGD	---NA---	60	0
A_G1OH9PT01BJCWH	---NA---	273	0
A_G1OH9PT01DLDNG	---NA---	336	0
A_G1OH9PT01AFLQP	---NA---	101	0
A_G1OH9PT01BJTKI	---NA---	149	0
A_G1OH9PT01CIF3C	---NA---	353	0
A_G1OH9PT01E17L6	---NA---	98	0
A_G1OH9PT01B6ZJA	cytoplasmic 2	329	17	2.43146e-14	0.790588
A_G1OH9PT01CD3GM	---NA---	198	0
A_G1OH9PT01C2HX9	protein	167	20	3.40903e-12	0.7485
A_G1OH9PT01ECOVQ	---NA---	321	0
A_G1OH9PT01CWITH	---NA---	340	0
A_G1OH9PT01DLJNQ	---NA---	334	0
A_G1OH9PT01DGUE2	---NA---	240	0
A_G1OH9PT01EEKZP	---NA---	354	0
A_G1OH9PT01AN5HO	---NA---	78	0
A_G1OH9PT01C8RK1	---NA---	360	0
A_G1OH9PT01CF40I	actin 2	114	9	8.53536e-10	0.854444
A_G1OH9PT01EJKUZ	---NA---	261	0
A_G1OH9PT01BMFUP	---NA---	335	0
A_G1OH9PT01EDN5Q	---NA---	307	0
A_G1OH9PT01B810A	---NA---	134	0
A_G1OH9PT01D9PE0	tripartite motif-containing 45	324	20	1.96021e-10	0.6185
A_G1OH9PT01AFR3Q	---NA---	342	0
A_G1OH9PT01COKXL	---NA---	364	0
A_G1OH9PT01C3XCX	---NA---	314	0
A_G1OH9PT01BIFH6	---NA---	296	0
A_G1OH9PT01E02TT	---NA---	310	0
A_G1OH9PT01A4821	---NA---	295	0
A_G1OH9PT01BG97J	sodium and chloride-dependent glycine transporter	337	20	3.77561e-17	0.6565
A_G1OH9PT01D8HS1	---NA---	375	0
A_G1OH9PT01CQFUB	---NA---	61	0
A_G1OH9PT01CRFWU	---NA---	303	0
A_G1OH9PT01EW7RK	---NA---	343	0
A_G1OH9PT01DODIK	---NA---	142	0
A_G1OH9PT01DJCZZ	---NA---	112	0
A_G1OH9PT01C8F7P	---NA---	140	0
A_G1OH9PT01BER12	---NA---	279	0
A_G1OH9PT01CI7NY	---NA---	321	0
A_G1OH9PT01CSJ5L	senescence-associated protein	271	9	2.105e-15	0.871111
A_G1OH9PT01DWPGH	zgc:158463 protein	344	20	4.93968e-24	0.8495
A_G1OH9PT01AXR62	---NA---	133	0
A_G1OH9PT01EARJR	---NA---	407	0
A_G1OH9PT01CIKST	---NA---	226	0
A_G1OH9PT01EP1IU	---NA---	347	0
A_G1OH9PT01ETSMF	---NA---	66	0
A_G1OH9PT01E43EM	---NA---	85	0
A_G1OH9PT01DISM9	---NA---	253	0
A_G1OH9PT01BC0K2	bestrophin 2	316	20	2.56278e-15	0.6805
A_G1OH9PT01EG52P	---NA---	80	0
A_G1OH9PT01EX7O9	branched chain alpha-ketoacid dehydrogenase kinase	292	20	7.24895e-10	0.7485
A_G1OH9PT01D5OKA	---NA---	106	0
A_G1OH9PT01A6LRQ	---NA---	358	0
A_G1OH9PT01B9JTO	---NA---	301	0
A_G1OH9PT01AMNQV	map microtubule affinity-regulating kinase	187	18	2.69734e-07	0.818333
A_G1OH9PT01BBJ64	---NA---	236	0
A_G1OH9PT01ATHKA	---NA---	202	0
A_G1OH9PT01BO0C9	carnitine acetyltransferase	248	3	2.69009e-05	0.65
A_G1OH9PT01B5KZ3	---NA---	179	0
A_G1OH9PT01EERUI	---NA---	201	0
A_G1OH9PT01DTLUG	---NA---	156	0
A_G1OH9PT01EZVSU	---NA---	87	0
A_G1OH9PT01DVB2O	sjchgc01974 protein	319	6	0.000291389	0.533333
A_G1OH9PT01DLSUO	myosin heavy nonmuscle or smooth muscle	345	20	2.97707e-11	0.5475
A_G1OH9PT01D4OGB	---NA---	121	0
A_G1OH9PT01CCSOV	---NA---	360	0
A_G1OH9PT01AOPO1	---NA---	86	0
A_G1OH9PT01C1GVB	elav-like protein 2	367	20	1.08331e-48	0.9075
A_G1OH9PT01BET8O	---NA---	326	0
A_G1OH9PT01AFSX3	---NA---	261	0
A_G1OH9PT01DTSNC	receptor protein tyrosine	373	20	5.24092e-43	0.759
A_G1OH9PT01EOX4Q	---NA---	378	0
A_G1OH9PT01DSNVJ	---NA---	53	0
A_G1OH9PT01AGL8V	---NA---	137	0
A_G1OH9PT01C18Z6	---NA---	326	0
A_G1OH9PT01BY2YB	---NA---	315	0
A_G1OH9PT01ERQJ6	zgc:158463 protein	196	20	1.05198e-26	0.804
A_G1OH9PT01BGU1J	unnamed protein product [Macaca fascicularis]	288	8	2.00122e-07	0.72
A_G1OH9PT01DLFVK	---NA---	364	0
A_G1OH9PT01DR6JM	---NA---	300	0
A_G1OH9PT01BZFI4	---NA---	369	0
A_G1OH9PT01CFFNV	---NA---	362	0
A_G1OH9PT01DU0GK	hypothetical protein DAPPUDRAFT_67127 [Daphnia pulex]	208	20	3.5174e-22	0.766
A_G1OH9PT01ASTQX	hemocyte protein-glutamine gamma-glutamyltransferase	244	20	6.9765e-37	0.8015
A_G1OH9PT01ALC13	chk1 checkpoint-like protein	267	11	7.57205e-15	0.74
A_G1OH9PT01EB7ZI	---NA---	238	0
A_G1OH9PT01DF2V5	---NA---	262	0
A_G1OH9PT01D4YRX	actin	204	20	1.62707e-32	0.886
A_G1OH9PT01A07XM	hypothetical protein Bm1_17870 [Brugia malayi]	305	4	2.03049e-15	0.675
A_G1OH9PT01BYUAT	partial	224	15	1.91555e-12	0.678667
A_G1OH9PT01AYUXO	---NA---	103	0
A_G1OH9PT01AJZX8	---NA---	229	0
A_G1OH9PT01B42N0	---NA---	264	0
A_G1OH9PT01ELMPX	---NA---	367	0
A_G1OH9PT01CZ99K	---NA---	240	0
A_G1OH9PT01DRSSS	---NA---	97	0
A_G1OH9PT01AR39U	---NA---	355	0
A_G1OH9PT01ATG4G	---NA---	155	0
A_G1OH9PT01D1G4V	predicted protein [Laccaria bicolor S238N-H82]	157	1	0.000154923	0.64
A_G1OH9PT01AOXOJ	---NA---	235	0
A_G1OH9PT01AURSX	---NA---	174	0
A_G1OH9PT01AWFJQ	---NA---	150	0
A_G1OH9PT01DWTBL	---NA---	160	0
A_G1OH9PT01CK7ZY	---NA---	53	0
A_G1OH9PT01A9CF8	---NA---	242	0
A_G1OH9PT01B9QLY	---NA---	104	0
A_G1OH9PT01DLHG1	gdp-mannose dehydratase	329	20	8.53334e-20	0.75
A_G1OH9PT01EFCGG	---NA---	51	0
A_G1OH9PT01BFE9V	---NA---	327	0
A_G1OH9PT01AX925	hypothetical protein DAPPUDRAFT_73464 [Daphnia pulex]	235	1	0.000688711	0.58
A_G1OH9PT01EDOAT	---NA---	119	0
A_G1OH9PT01EEULX	---NA---	415	0
A_G1OH9PT01COLVC	---NA---	343	0
A_G1OH9PT01EKSR9	---NA---	387	0
A_G1OH9PT01EK3SL	---NA---	129	0
A_G1OH9PT01ETFB9	enhancer of rudimentary homolog	350	20	1.63406e-67	0.9515
A_G1OH9PT01DEHPJ	---NA---	286	0
A_G1OH9PT01A4DIK	hypothetical protein Phum_PHUM590900 [Pediculus humanus corporis]	233	1	3.51342e-08	0.61
A_G1OH9PT01BCTJD	hypothetical protein Bm1_28695 [Brugia malayi]	251	4	2.97422e-11	0.7575
A_G1OH9PT01C4IWQ	---NA---	70	0
A_G1OH9PT01CB48W	diguanylate cyclase	267	3	1.54475e-27	0.803333
A_G1OH9PT01BTFGB	---NA---	324	0
A_G1OH9PT01AQNUM	---NA---	342	0
A_G1OH9PT01C7048	conserved hypothetical protein [Pediculus humanus corporis]	285	6	2.81285e-14	0.686667
A_G1OH9PT01AMW7L	---NA---	342	0
A_G1OH9PT01DKR0V	---NA---	197	0
A_G1OH9PT01DP8D3	solute carrier family member 9	316	20	2.50399e-13	0.653
A_G1OH9PT01DQWHZ	---NA---	118	0
A_G1OH9PT01A2A9B	---NA---	167	0
A_G1OH9PT01EI7C8	---NA---	362	0
A_G1OH9PT01CQV6D	---NA---	232	0
A_G1OH9PT01DXFEQ	isoform b	363	20	1.34652e-59	0.5745
A_G1OH9PT01BU1OQ	---NA---	205	0
A_G1OH9PT01EVXRO	---NA---	117	0
A_G1OH9PT01EW1EW	---NA---	189	0
A_G1OH9PT01AE8U2	---NA---	145	0
A_G1OH9PT01BPEQK	---NA---	328	0
A_G1OH9PT01CTSS1	---NA---	348	0
A_G1OH9PT01CZAKH	---NA---	80	0
A_G1OH9PT01C05SI	---NA---	310	0
A_G1OH9PT01D46CG	---NA---	294	0
A_G1OH9PT01BTDG0	---NA---	329	0
A_G1OH9PT01DO6OQ	---NA---	104	0
A_G1OH9PT01BLND7	---NA---	361	0
A_G1OH9PT01BG2L5	ac1147-like protein	253	20	1.75759e-24	0.8715
A_G1OH9PT01CQA47	ankyrin isoform e	341	20	2.63025e-57	0.9365
A_G1OH9PT01EM39D	---NA---	167	0
A_G1OH9PT01DB5VW	---NA---	172	0
A_G1OH9PT01AZ5QW	---NA---	66	0
A_G1OH9PT01C4MA6	---NA---	290	0
A_G1OH9PT01BPBEF	---NA---	240	0
A_G1OH9PT01B38I3	---NA---	321	0
A_G1OH9PT01AINDX	---NA---	191	0
A_G1OH9PT01CRM2I	---NA---	90	0
A_G1OH9PT01DCCPU	---NA---	249	0
A_G1OH9PT01CYIN1	---NA---	91	0
A_G1OH9PT01EGZ2Y	---NA---	182	0
A_G1OH9PT01CK6BK	---NA---	152	0
A_G1OH9PT01EPX7G	---NA---	313	0
A_G1OH9PT01CV1CD	platelet-activating factor acetylhydrolase ib subunit gamma	338	20	3.59981e-33	0.8305
A_G1OH9PT01CGBG6	---NA---	338	0
A_G1OH9PT01DRFRI	---NA---	276	0
A_G1OH9PT01BHZOS	---NA---	140	0
A_G1OH9PT01CNUBB	---NA---	116	0
A_G1OH9PT01B0FBU	---NA---	307	0
A_G1OH9PT01E3IKN	---NA---	134	0
A_G1OH9PT01CHDME	---NA---	109	0
A_G1OH9PT01BAVT2	---NA---	78	0
A_G1OH9PT01BFD4N	chk1 checkpoint-like protein	155	9	4.7035e-15	0.764444
A_G1OH9PT01C6712	---NA---	335	0
A_G1OH9PT01D8VQ0	---NA---	124	0
A_G1OH9PT01CQSPA	---NA---	270	0
A_G1OH9PT01EQNKI	---NA---	170	0
A_G1OH9PT01ADMPZ	---NA---	112	0
A_G1OH9PT01DIVQH	---NA---	51	0
A_G1OH9PT01B08JH	---NA---	93	0
A_G1OH9PT01BCPJL	---NA---	154	0
A_G1OH9PT01C5V8I	---NA---	367	0
A_G1OH9PT01B1B6K	---NA---	66	0
A_G1OH9PT01BFYY5	---NA---	312	0
A_G1OH9PT01DT430	---NA---	347	0
A_G1OH9PT01DCW0B	---NA---	221	0
A_G1OH9PT01EEQ0J	---NA---	55	0
A_G1OH9PT01BVE5D	---NA---	57	0
A_G1OH9PT01DITR9	arginine kinase	348	14	5.52379e-31	0.788571
A_G1OH9PT01BYNYQ	---NA---	296	0
A_G1OH9PT01EV1PC	---NA---	177	0
A_G1OH9PT01CVFP8	---NA---	153	0
A_G1OH9PT01EE6NN	---NA---	181	0
A_G1OH9PT01BND4K	---NA---	201	0
A_G1OH9PT01CRWE6	predicted protein [Nematostella vectensis]	372	1	3.04799e-06	0.68
A_G1OH9PT01EJK1Q	---NA---	298	0
A_G1OH9PT01A226K	---NA---	199	0
A_G1OH9PT01EBRAN	---NA---	128	0
A_G1OH9PT01DGNX8	---NA---	163	0
A_G1OH9PT01BUSKT	isoform cra_c	383	20	1.21177e-08	0.7215
A_G1OH9PT01A1VHK	---NA---	314	0
A_G1OH9PT01CCU3S	---NA---	337	0
A_G1OH9PT01CK7KC	---NA---	361	0
A_G1OH9PT01CMDZM	---NA---	199	0
A_G1OH9PT01CRCM8	ubiquitin carboxyl-terminal hydrolase 5	315	20	2.57378e-23	0.7515
A_G1OH9PT01DD9VO	---NA---	366	0
A_G1OH9PT01DAAXW	---NA---	342	0
A_G1OH9PT01ASN47	---NA---	73	0
A_G1OH9PT01DVUD4	---NA---	145	0
A_G1OH9PT01CR3Z3	---NA---	65	0
A_G1OH9PT01D31N9	---NA---	254	0
A_G1OH9PT01CKUB2	---NA---	306	0
A_G1OH9PT01C4WT6	---NA---	380	0
A_G1OH9PT01D2LCN	---NA---	291	0
A_G1OH9PT01A40WK	n-arginine dibasic nrd convertase 1	294	20	2.3294e-12	0.637
A_G1OH9PT01BDULY	---NA---	160	0
A_G1OH9PT01E3RQM	ns1 binding protein	290	4	6.17337e-05	0.6025
A_G1OH9PT01BSD1H	---NA---	324	0
A_G1OH9PT01EFRY7	ac1147-like protein	375	20	2.8233e-34	0.79
A_G1OH9PT01BE0KG		266
A_G1OH9PT01A0677	---NA---	79	0
A_G1OH9PT01D28O0	---NA---	55	0
A_G1OH9PT01CH5NB	---NA---	96	0
A_G1OH9PT01EBN70	---NA---	342	0
A_G1OH9PT01BNGLE	---NA---	133	0
A_G1OH9PT01AE9C4	---NA---	350	0
A_G1OH9PT01DK7P0	---NA---	150	0
A_G1OH9PT01AINN5	---NA---	140	0
A_G1OH9PT01CD0X6	af474969_1myosin heavy chain	176	2	1.09459e-08	0.78
A_G1OH9PT01CMQY3	---NA---	289	0
A_G1OH9PT01B06ID	---NA---	289	0
A_G1OH9PT01D0GJJ	---NA---	307	0
A_G1OH9PT01EK7OI	---NA---	243	0
A_G1OH9PT01AVM17	tropomyosin	285	20	2.67266e-09	0.895
A_G1OH9PT01EE97F	---NA---	64	0
A_G1OH9PT01C3JDY	---NA---	202	0
A_G1OH9PT01DFR7M	---NA---	333	0
A_G1OH9PT01A8F9G	---NA---	307	0
A_G1OH9PT01C0F9P	---NA---	267	0
A_G1OH9PT01DOVSD	---NA---	149	0
A_G1OH9PT01DPGER	---NA---	212	0
A_G1OH9PT01CK0QL	---NA---	109	0
A_G1OH9PT01EMDEY	---NA---	366	0
A_G1OH9PT01B4N1X	---NA---	316	0
A_G1OH9PT01ASFTL	senescence-associated protein	291	10	1.75931e-25	0.835
A_G1OH9PT01CX9WL	---NA---	59	0
A_G1OH9PT01AD3BK	---NA---	198	0
A_G1OH9PT01DK4CF	liprin-beta-1 isoform 2	432	20	5.56067e-19	0.705
A_G1OH9PT01A7OG2	---NA---	368	0
A_G1OH9PT01D0MFU	---NA---	255	0
A_G1OH9PT01CNSEV	tigger transposable element derived 6-like isoform 2	335	1	1.23728e-08	0.68
A_G1OH9PT01CRSSM	---NA---	162	0
A_G1OH9PT01BHHGI	---NA---	337	0
A_G1OH9PT01CZ154	---NA---	131	0
A_G1OH9PT01ELZPH	---NA---	64	0
A_G1OH9PT01CJ2O8	cg11160 cg11160-pa	281	20	1.90685e-12	0.5535
A_G1OH9PT01C18TO	---NA---	78	0
A_G1OH9PT01E14OR	---NA---	54	0
A_G1OH9PT01EMYMQ	---NA---	268	0
A_G1OH9PT01CHIRK	rrna promoter binding protein	298	20	3.03089e-10	0.5895
A_G1OH9PT01CDHXE	---NA---	61	0
A_G1OH9PT01BBXJT	---NA---	118	0
A_G1OH9PT01AQQY7	---NA---	174	0
A_G1OH9PT01DJHQO	organic cation transporter	298	20	9.27879e-08	0.6505
A_G1OH9PT01ELJII	---NA---	346	0
A_G1OH9PT01CBLQF	---NA---	387	0
A_G1OH9PT01AXL7U	---NA---	314	0
A_G1OH9PT01BZMPI	---NA---	364	0
A_G1OH9PT01CJJ6D	lancl1 protein	353	20	9.07533e-20	0.723
A_G1OH9PT01AM55J	---NA---	325	0
A_G1OH9PT01EQUXO	---NA---	59	0
A_G1OH9PT01EFM9R	---NA---	410	0
A_G1OH9PT01D79O9	---NA---	312	0
A_G1OH9PT01EBHGE	---NA---	111	0
A_G1OH9PT01A8Q5F	---NA---	180	0
A_G1OH9PT01BTD2X	---NA---	368	0
A_G1OH9PT01A6AKS	---NA---	379	0
A_G1OH9PT01DV041	---NA---	213	0
A_G1OH9PT01EK0VT	---NA---	105	0
A_G1OH9PT01EYNFS	---NA---	98	0
A_G1OH9PT01ASKJC	integral membrane transporter protein	136	3	2.53125e-15	0.78
A_G1OH9PT01EEKRT	ryanodine receptor homologue	418	20	1.53343e-30	0.741
A_G1OH9PT01BJVUR	---NA---	272	0
A_G1OH9PT01BG8HZ	---NA---	331	0
A_G1OH9PT01BKOM0	---NA---	166	0
A_G1OH9PT01ASWPF	multi-sensor hybrid histidine kinase	288	20	1.21167e-10	0.654
A_G1OH9PT01C2DWI	---NA---	226	0
A_G1OH9PT01CF3Y0	ubiquitin protein ligase	292	20	3.32462e-15	0.6895
A_G1OH9PT01BZ1F0	---NA---	65	0
A_G1OH9PT01DW5QA	---NA---	306	0
A_G1OH9PT01BGH1W	---NA---	63	0
A_G1OH9PT01C9NYB	---NA---	121	0
A_G1OH9PT01COT21	---NA---	250	0
A_G1OH9PT01AHGYK	---NA---	326	0
A_G1OH9PT01CUTX8	---NA---	307	0
A_G1OH9PT01CU4HY	---NA---	151	0
A_G1OH9PT01CKXYP	---NA---	51	0
A_G1OH9PT01ERFWR	---NA---	349	0
A_G1OH9PT01AXFDT	---NA---	163	0
A_G1OH9PT01B4GKL	---NA---	139	0
A_G1OH9PT01CGWK7	---NA---	139	0
A_G1OH9PT01CQ07D	zinc finger protein 347-like	271	20	1.72132e-07	0.582
A_G1OH9PT01A7GTF	---NA---	193	0
A_G1OH9PT01DRDGY	---NA---	475	0
A_G1OH9PT01ENOQG	---NA---	345	0
A_G1OH9PT01A7MGS	---NA---	203	0
A_G1OH9PT01C0U78	---NA---	201	0
A_G1OH9PT01B0DI6	protein	265	20	1.35886e-21	0.6715
A_G1OH9PT01AMSHV	h aca ribonucleoprotein complex subunit 1-like protein	387	19	2.00709e-15	0.720526
A_G1OH9PT01DP4CD	---NA---	389	0
A_G1OH9PT01DR9AU	beta-actin	279	20	3.5034e-20	0.959
A_G1OH9PT01CEC4J	---NA---	276	0
A_G1OH9PT01BUXSI	---NA---	364	0
A_G1OH9PT01EVOOZ	chk1 checkpoint-like protein	309	8	2.3286e-09	0.73875
A_G1OH9PT01D59TW	---NA---	352	0
A_G1OH9PT01BGM9B	---NA---	215	0
A_G1OH9PT01C7IO2	---NA---	91	0
A_G1OH9PT01E01Z0	---NA---	137	0
A_G1OH9PT01DMPUK	---NA---	353	0
A_G1OH9PT01D7B4A	isoform e	337	20	1.74526e-42	0.885
A_G1OH9PT01D0GB4	hypothetical protein [Schistosoma mansoni]	286	1	6.86576e-05	0.69
A_G1OH9PT01C0IP9	---NA---	317	0
A_G1OH9PT01AUP17	down syndrome cell adhesion molecule	361	20	2.70282e-09	0.53
A_G1OH9PT01EWQMA	---NA---	180	0
A_G1OH9PT01DRV3T	protein	239	2	2.37766e-13	0.71
A_G1OH9PT01BUKA8	---NA---	89	0
A_G1OH9PT01EMHNN	---NA---	195	0
A_G1OH9PT01B2BMW	isoform a	411	20	1.22425e-30	0.672
A_G1OH9PT01BLOT3	---NA---	105	0
A_G1OH9PT01C2ZFY	---NA---	392	0
A_G1OH9PT01B7B2O	---NA---	182	0
A_G1OH9PT01EL57L	---NA---	57	0
A_G1OH9PT01AD1FD	---NA---	223	0
A_G1OH9PT01DSO3J	---NA---	344	0
A_G1OH9PT01AZCRL	---NA---	363	0
A_G1OH9PT01ART6U	---NA---	94	0
A_G1OH9PT01CMI3O	---NA---	71	0
A_G1OH9PT01ENZ79	---NA---	344	0
A_G1OH9PT01CFA0C	scpb_pensp ame: full=sarcoplasmic calcium-binding beta chain short=scp beta chain	206	1	1.88379e-06	0.82
A_G1OH9PT01DGS5I	senescence-associated protein	327	8	1.76829e-22	0.6025
A_G1OH9PT01AZV4J	zinc finger protein 347-like	272	20	1.78686e-07	0.584
A_G1OH9PT01B0PA7	---NA---	367	0
A_G1OH9PT01BGPOK	---NA---	188	0
A_G1OH9PT01E0CTM	myosin heavy chain	360	20	9.22838e-15	0.9125
A_G1OH9PT01DKP5D	---NA---	346	0
A_G1OH9PT01DZM7V	---NA---	197	0
A_G1OH9PT01B53U8	---NA---	102	0
A_G1OH9PT01COPHP	---NA---	185	0
A_G1OH9PT01AZAXM	---NA---	175	0
A_G1OH9PT01ASYP1	---NA---	337	0
A_G1OH9PT01EEYJD	sarcoplasmic calcium-binding beta chain	185	20	1.66562e-27	0.87
A_G1OH9PT01A11PV	---NA---	64	0
A_G1OH9PT01AYQII	---NA---	55	0
A_G1OH9PT01APW99	---NA---	157	0
A_G1OH9PT01CSR2X	#NAME?	348	20	1.08934e-36	0.8405
A_G1OH9PT01B3OTQ	---NA---	328	0
A_G1OH9PT01B56DY	---NA---	296	0
A_G1OH9PT01CNOCT	---NA---	368	0
A_G1OH9PT01DR1BV	---NA---	58	0
A_G1OH9PT01C0HJX	hypothetical protein Bm1_17870 [Brugia malayi]	375	1	6.09236e-10	0.71
A_G1OH9PT01BCOZA	---NA---	318	0
A_G1OH9PT01DT2I1	---NA---	247	0
A_G1OH9PT01DQKPE	---NA---	365	0
A_G1OH9PT01DBRQ0	---NA---	396	0
A_G1OH9PT01CDCRL	---NA---	172	0
A_G1OH9PT01BEK51	---NA---	398	0
A_G1OH9PT01EATKZ	cg3822 cg3822-pa	280	20	9.90228e-26	0.855
A_G1OH9PT01CNZ0Y	---NA---	285	0
A_G1OH9PT01AXULW	---NA---	51	0
A_G1OH9PT01AXLA0	---NA---	87	0
A_G1OH9PT01CZTCN	---NA---	154	0
A_G1OH9PT01ASICT	---NA---	384	0
A_G1OH9PT01C7EQ2	protein	172	20	4.17522e-16	0.8355
A_G1OH9PT01CJUGG	---NA---	301	0
A_G1OH9PT01AV6A4	---NA---	61	0
A_G1OH9PT01EUTOD	---NA---	73	0
A_G1OH9PT01DVCBU	---NA---	346	0
A_G1OH9PT01DVFO6	---NA---	372	0
A_G1OH9PT01CXDDG	---NA---	198	0
A_G1OH9PT01B6DVD	---NA---	281	0
A_G1OH9PT01DOKJW	---NA---	69	0
A_G1OH9PT01C4K6R	---NA---	328	0
A_G1OH9PT01EDYR7	---NA---	210	0
A_G1OH9PT01ESXBM	---NA---	342	0
A_G1OH9PT01CYVPB	---NA---	96	0
A_G1OH9PT01C9WBO	---NA---	295	0
A_G1OH9PT01DRIJ1	---NA---	293	0
A_G1OH9PT01ETDXZ	---NA---	141	0
A_G1OH9PT01CWK20	---NA---	357	0
A_G1OH9PT01C49EK	---NA---	241	0
A_G1OH9PT01AQK4Q	---NA---	270	0
A_G1OH9PT01A2MUC	---NA---	267	0
A_G1OH9PT01EFFKY	---NA---	339	0
A_G1OH9PT01EUFMP	---NA---	386	0
A_G1OH9PT01D2MGN	hypothetical protein DAPPUDRAFT_238415 [Daphnia pulex]	215	3	7.75015e-06	0.6
A_G1OH9PT01BYRXH	myosin heavy chain	179	20	1.08477e-19	0.9955
A_G1OH9PT01CN7MO	---NA---	360	0
A_G1OH9PT01ENGE2	---NA---	217	0
A_G1OH9PT01EUSMR	---NA---	117	0
A_G1OH9PT01D6N5M	protein	265	20	1.35886e-21	0.6715
A_G1OH9PT01DKHLA	---NA---	279	0
A_G1OH9PT01CJSQA	---NA---	147	0
A_G1OH9PT01E0NGF	tropomyosin	152	20	1.40695e-06	0.9985
A_G1OH9PT01BMQSO	---NA---	274	0
A_G1OH9PT01A7NTV	---NA---	52	0
A_G1OH9PT01D93CN	---NA---	429	0
A_G1OH9PT01DY53E	---NA---	381	0
A_G1OH9PT01DOKBY	---NA---	376	0
A_G1OH9PT01DCXDF	---NA---	316	0
A_G1OH9PT01EWQTB	---NA---	359	0
A_G1OH9PT01D86US	---NA---	95	0
A_G1OH9PT01BJEOZ	---NA---	149	0
A_G1OH9PT01ETRGV	upf0517 transmembrane protein cg10671	284	20	2.5211e-12	0.556
A_G1OH9PT01B1XAU	---NA---	443	0
A_G1OH9PT01BXHCQ	---NA---	72	0
A_G1OH9PT01A0JKI	---NA---	119	0
A_G1OH9PT01AV4V6	---NA---	57	0
A_G1OH9PT01A8K1N	---NA---	206	0
A_G1OH9PT01BHFM9	---NA---	398	0
A_G1OH9PT01C2LFS	---NA---	338	0
A_G1OH9PT01DUKMZ	---NA---	385	0
A_G1OH9PT01BKEPU	---NA---	325	0
A_G1OH9PT01C4YKH	poly(adp-ribose) glycohydrolase arh3	295	20	3.31208e-23	0.765
A_G1OH9PT01DX562	---NA---	361	0
A_G1OH9PT01DU1AW	---NA---	185	0
A_G1OH9PT01CQOGK	---NA---	128	0
A_G1OH9PT01EROOI	---NA---	378	0
A_G1OH9PT01E3OQO	---NA---	196	0
A_G1OH9PT01B11F4	---NA---	89	0
A_G1OH9PT01CPFP4	---NA---	211	0
A_G1OH9PT01CP7A1	---NA---	308	0
A_G1OH9PT01B9B5Y	---NA---	50	0
A_G1OH9PT01CST2W	---NA---	349	0
A_G1OH9PT01A2VFR	---NA---	378	0
A_G1OH9PT01CHMUE	---NA---	129	0
A_G1OH9PT01ERINJ	---NA---	204	0
A_G1OH9PT01BUTO6	---NA---	65	0
A_G1OH9PT01AYIBY	---NA---	102	0
A_G1OH9PT01BM5SF	hypothetical protein DAPPUDRAFT_73464 [Daphnia pulex]	235	1	0.000688711	0.58
A_G1OH9PT01EW654	---NA---	354	0
A_G1OH9PT01C96R4	---NA---	240	0
A_G1OH9PT01C5YKU	---NA---	320	0
A_G1OH9PT01C3Q0Y	mitochondrial serine hydroxymethyltransferase	405	20	8.95432e-23	0.9005
A_G1OH9PT01A3ZHX	rna-binding protein nob1-like	329	20	1.69289e-17	0.7975
A_G1OH9PT01ATOB3	---NA---	62	0
A_G1OH9PT01BOHZ4	---NA---	293	0
A_G1OH9PT01AZ2BT	agap007532-pa isoform 2	341	5	4.74414e-06	0.794
A_G1OH9PT01EUVLR	integral membrane transporter protein	394	19	3.1326e-18	0.854737
A_G1OH9PT01A4KJC	---NA---	354	0
A_G1OH9PT01CGRSU	---NA---	117	0
A_G1OH9PT01D2AU4	---NA---	301	0
A_G1OH9PT01D2IRU	---NA---	340	0
A_G1OH9PT01CYHY8	---NA---	82	0
A_G1OH9PT01DT1RR	---NA---	294	0
A_G1OH9PT01AOZ0P	---NA---	148	0
A_G1OH9PT01ENO84	protein	407	9	4.20004e-25	0.683333
A_G1OH9PT01DGLHF	---NA---	66	0
A_G1OH9PT01EFV9H	uncharacterized protein ylr162w-a	150	5	3.1102e-08	0.72
A_G1OH9PT01EPT6R	---NA---	131	0
A_G1OH9PT01EESP5	---NA---	282	0
A_G1OH9PT01CEX9Y	---NA---	317	0
A_G1OH9PT01DM50S	---NA---	276	0
A_G1OH9PT01DEAY8	---NA---	353	0
A_G1OH9PT01C4MSM	---NA---	280	0
A_G1OH9PT01DT7AF	---NA---	103	0
A_G1OH9PT01ASYJJ	---NA---	207	0
A_G1OH9PT01C52V2	---NA---	74	0
A_G1OH9PT01B0VB0	---NA---	87	0
A_G1OH9PT01EE3FS	---NA---	104	0
A_G1OH9PT01B5GWL	---NA---	63	0
A_G1OH9PT01BLB1T	---NA---	328	0
A_G1OH9PT01DTE9S	---NA---	292	0
A_G1OH9PT01CZEAT	---NA---	300	0
A_G1OH9PT01ARWD8	---NA---	294	0
A_G1OH9PT01EDULQ	---NA---	74	0
A_G1OH9PT01E31HO	---NA---	172	0
A_G1OH9PT01DTCR6	---NA---	339	0
A_G1OH9PT01EM4RK	---NA---	355	0
A_G1OH9PT01D0Z4D	---NA---	258	0
A_G1OH9PT01CYDZ6	---NA---	344	0
A_G1OH9PT01CQD76	---NA---	388	0
A_G1OH9PT01EQIY6	senescence-associated protein	340	13	3.45697e-16	0.759231
A_G1OH9PT01CRT4J	---NA---	204	0
[truncated: 249,209+ more rows]
