# Supplementary material for: Transcriptomics of a Giant Freshwater Prawn (Macrobrachium rosenbergii): De Novo Assembly, Annotation and Marker Discovery
Source: PLoS One. 2011 Dec 8;6(12):e27938. doi: 10.1371/journal.pone.0027938 (PMC3234237; doi:10.1371/journal.pone.0027938)
Supplement: Table S4 — InterProScan domain search of M . rosenbergii contig sequences. (XLSX) [file pone.0027938.s004.xlsx]

## Sheet: GFP IPS Contigs
Seq ID	IPR accession number	Domain Description	Domain Type	Signatures/GO Terms
A_000001	IPR014001	DEAD-like helicase	Domain	SM00487 (SMART)
A_000001	IPR014001	DEAD-like helicase	Domain	PS51192 (PROFILE)
A_000001	IPR014001	DEAD-like helicase	Domain
A_000001	IPR011545	DNA/RNA helicase, DEAD/DEAH box type, N-terminal	Domain	PF00270 (PFAM)
A_000001	IPR011545	DNA/RNA helicase, DEAD/DEAH box type, N-terminal	Domain	GO:0003676
A_000001	IPR011545	DNA/RNA helicase, DEAD/DEAH box type, N-terminal	Domain	GO:0005524
A_000001	IPR011545	DNA/RNA helicase, DEAD/DEAH box type, N-terminal	Domain	GO:0008026
A_000001	IPR000629	RNA helicase, ATP-dependent, DEAD-box, conserved site	Conserved_site	PS00039 (PROSITE)
A_000001	IPR000629	RNA helicase, ATP-dependent, DEAD-box, conserved site	Conserved_site	GO:0003676
A_000001	IPR000629	RNA helicase, ATP-dependent, DEAD-box, conserved site	Conserved_site	GO:0005524
A_000001	IPR000629	RNA helicase, ATP-dependent, DEAD-box, conserved site	Conserved_site	GO:0008026
A_000001	IPR014014	RNA helicase, DEAD-box type, Q motif	Domain	PS51195 (PROFILE)
A_000001	IPR014014	RNA helicase, DEAD-box type, Q motif	Domain
A_000001	noIPR	unintegrated	unintegrated	G3DSA:3.40.50.300 (GENE3D)
A_000001	noIPR	unintegrated	unintegrated	PTHR24031 (PANTHER)
A_000001	noIPR	unintegrated	unintegrated	PTHR24031:SF50 (PANTHER)
A_000001	noIPR	unintegrated	unintegrated	SSF52540 (SUPERFAMILY)
A_000001	noIPR	unintegrated	unintegrated
A_000002	IPR004241	Light chain 3 (LC3)	Family	PTHR10969 (PANTHER)
A_000002	IPR004241	Light chain 3 (LC3)	Family	PF02991 (PFAM)
A_000002	IPR004241	Light chain 3 (LC3)	Family
A_000002	noIPR	unintegrated	unintegrated	G3DSA:3.10.20.90 (GENE3D)
A_000002	noIPR	unintegrated	unintegrated	PTHR10969:SF5 (PANTHER)
A_000002	noIPR	unintegrated	unintegrated	SSF54236 (SUPERFAMILY)
A_000002	noIPR	unintegrated	unintegrated
A_000003	noIPR	unintegrated	unintegrated	seg (SEG)
A_000003	noIPR	unintegrated	unintegrated
A_000005	noIPR	unintegrated	unintegrated	SignalP-NN(euk) (SIGNALP)
A_000005	noIPR	unintegrated	unintegrated
A_000006	IPR015650	Heavy chain of Myosin	Family	PTHR13140:SF22 (PANTHER)
A_000006	IPR015650	Heavy chain of Myosin	Family
A_000006	IPR001609	Myosin head, motor domain	Domain	PF00063 (PFAM)
A_000006	IPR001609	Myosin head, motor domain	Domain	SM00242 (SMART)
A_000006	IPR001609	Myosin head, motor domain	Domain	GO:0003774
A_000006	IPR001609	Myosin head, motor domain	Domain	GO:0005524
A_000006	IPR001609	Myosin head, motor domain	Domain	GO:0016459
A_000006	IPR002928	Myosin tail	Domain	PF01576 (PFAM)
A_000006	IPR002928	Myosin tail	Domain	GO:0003774
A_000006	IPR002928	Myosin tail	Domain	GO:0016459
A_000006	IPR009053	Prefoldin	Domain	SSF46579 (SUPERFAMILY)
A_000006	IPR009053	Prefoldin	Domain
A_000006	noIPR	unintegrated	unintegrated	coil (COIL)
A_000006	noIPR	unintegrated	unintegrated	G3DSA:4.10.270.10 (GENE3D)
A_000006	noIPR	unintegrated	unintegrated	PTHR13140 (PANTHER)
A_000006	noIPR	unintegrated	unintegrated	seg (SEG)
A_000006	noIPR	unintegrated	unintegrated	SSF52540 (SUPERFAMILY)
A_000006	noIPR	unintegrated	unintegrated
A_000007	IPR000109	Oligopeptide transporter	Family	PF00854 (PFAM)
A_000007	IPR000109	Oligopeptide transporter	Family	GO:0005215
A_000007	IPR000109	Oligopeptide transporter	Family	GO:0006857
A_000007	IPR000109	Oligopeptide transporter	Family	GO:0016020
A_000007	noIPR	unintegrated	unintegrated	PTHR11654 (PANTHER)
A_000007	noIPR	unintegrated	unintegrated	PTHR11654:SF13 (PANTHER)
A_000007	noIPR	unintegrated	unintegrated	seg (SEG)
A_000007	noIPR	unintegrated	unintegrated	tmhmm (TMHMM)
A_000007	noIPR	unintegrated	unintegrated
A_000008	IPR004001	Actin, conserved site	Conserved_site	PS00406 (PROSITE)
A_000008	IPR004001	Actin, conserved site	Conserved_site	GO:0005524
A_000008	IPR020902	Actin/actin-like conserved site	Conserved_site	PS01132 (PROSITE)
A_000008	IPR020902	Actin/actin-like conserved site	Conserved_site
A_000008	IPR004000	Actin-like	Family	PR00190 (PRINTS)
A_000008	IPR004000	Actin-like	Family	PTHR11937 (PANTHER)
A_000008	IPR004000	Actin-like	Family	PF00022 (PFAM)
A_000008	IPR004000	Actin-like	Family	SM00268 (SMART)
A_000008	IPR004000	Actin-like	Family
A_000008	noIPR	unintegrated	unintegrated	G3DSA:2.30.36.70 (GENE3D)
A_000008	noIPR	unintegrated	unintegrated	G3DSA:3.30.420.40 (GENE3D)
A_000008	noIPR	unintegrated	unintegrated	G3DSA:3.90.640.10 (GENE3D)
A_000008	noIPR	unintegrated	unintegrated	PTHR11937:SF77 (PANTHER)
A_000008	noIPR	unintegrated	unintegrated	SSF53067 (SUPERFAMILY)
A_000008	noIPR	unintegrated	unintegrated
A_000009	IPR015650	Heavy chain of Myosin	Family	PTHR13140:SF22 (PANTHER)
A_000009	IPR015650	Heavy chain of Myosin	Family
A_000009	IPR002928	Myosin tail	Domain	PF01576 (PFAM)
A_000009	IPR002928	Myosin tail	Domain	GO:0003774
A_000009	IPR002928	Myosin tail	Domain	GO:0016459
A_000009	noIPR	unintegrated	unintegrated	coil (COIL)
A_000009	noIPR	unintegrated	unintegrated	PTHR13140 (PANTHER)
A_000009	noIPR	unintegrated	unintegrated	seg (SEG)
A_000009	noIPR	unintegrated	unintegrated
A_000010	IPR015650	Heavy chain of Myosin	Family	PTHR13140:SF22 (PANTHER)
A_000010	IPR015650	Heavy chain of Myosin	Family
A_000010	IPR000048	IQ motif, EF-hand binding site	Binding_site	PS50096 (PROFILE)
A_000010	IPR000048	IQ motif, EF-hand binding site	Binding_site	GO:0005515
A_000010	IPR001609	Myosin head, motor domain	Domain	PF00063 (PFAM)
A_000010	IPR001609	Myosin head, motor domain	Domain	SM00242 (SMART)
A_000010	IPR001609	Myosin head, motor domain	Domain	GO:0003774
A_000010	IPR001609	Myosin head, motor domain	Domain	GO:0005524
A_000010	IPR001609	Myosin head, motor domain	Domain	GO:0016459
A_000010	IPR002928	Myosin tail	Domain	PF01576 (PFAM)
A_000010	IPR002928	Myosin tail	Domain	GO:0003774
A_000010	IPR002928	Myosin tail	Domain	GO:0016459
A_000010	IPR009053	Prefoldin	Domain	SSF46579 (SUPERFAMILY)
A_000010	IPR009053	Prefoldin	Domain
A_000010	noIPR	unintegrated	unintegrated	coil (COIL)
A_000010	noIPR	unintegrated	unintegrated	G3DSA:4.10.270.10 (GENE3D)
A_000010	noIPR	unintegrated	unintegrated	PTHR13140 (PANTHER)
A_000010	noIPR	unintegrated	unintegrated	seg (SEG)
A_000010	noIPR	unintegrated	unintegrated	SSF52540 (SUPERFAMILY)
A_000010	noIPR	unintegrated	unintegrated
A_000011	noIPR	unintegrated	unintegrated	seg (SEG)
A_000011	noIPR	unintegrated	unintegrated
A_000013	noIPR	unintegrated	unintegrated	seg (SEG)
A_000013	noIPR	unintegrated	unintegrated
A_000014	noIPR	unintegrated	unintegrated	seg (SEG)
A_000014	noIPR	unintegrated	unintegrated	tmhmm (TMHMM)
A_000014	noIPR	unintegrated	unintegrated
A_000015	noIPR	unintegrated	unintegrated	seg (SEG)
A_000015	noIPR	unintegrated	unintegrated
A_000016	IPR015650	Heavy chain of Myosin	Family	PTHR13140:SF22 (PANTHER)
A_000016	IPR015650	Heavy chain of Myosin	Family
A_000016	IPR001609	Myosin head, motor domain	Domain	PR00193 (PRINTS)
A_000016	IPR001609	Myosin head, motor domain	Domain	PF00063 (PFAM)
A_000016	IPR001609	Myosin head, motor domain	Domain	SM00242 (SMART)
A_000016	IPR001609	Myosin head, motor domain	Domain	GO:0003774
A_000016	IPR001609	Myosin head, motor domain	Domain	GO:0005524
A_000016	IPR001609	Myosin head, motor domain	Domain	GO:0016459
A_000016	IPR004009	Myosin, N-terminal, SH3-like	Domain	PF02736 (PFAM)
A_000016	IPR004009	Myosin, N-terminal, SH3-like	Domain	GO:0003774
A_000016	IPR004009	Myosin, N-terminal, SH3-like	Domain	GO:0005524
A_000016	IPR004009	Myosin, N-terminal, SH3-like	Domain	GO:0016459
A_000016	noIPR	unintegrated	unintegrated	PTHR13140 (PANTHER)
A_000016	noIPR	unintegrated	unintegrated	SSF52540 (SUPERFAMILY)
A_000016	noIPR	unintegrated	unintegrated
A_000017	noIPR	unintegrated	unintegrated	SignalP-NN(euk) (SIGNALP)
A_000017	noIPR	unintegrated	unintegrated
A_000018	IPR015650	Heavy chain of Myosin	Family	PTHR13140:SF22 (PANTHER)
A_000018	IPR015650	Heavy chain of Myosin	Family
A_000018	IPR001609	Myosin head, motor domain	Domain	PR00193 (PRINTS)
A_000018	IPR001609	Myosin head, motor domain	Domain	PF00063 (PFAM)
A_000018	IPR001609	Myosin head, motor domain	Domain	SM00242 (SMART)
A_000018	IPR001609	Myosin head, motor domain	Domain	GO:0003774
A_000018	IPR001609	Myosin head, motor domain	Domain	GO:0005524
A_000018	IPR001609	Myosin head, motor domain	Domain	GO:0016459
A_000018	IPR004009	Myosin, N-terminal, SH3-like	Domain	PF02736 (PFAM)
A_000018	IPR004009	Myosin, N-terminal, SH3-like	Domain	GO:0003774
A_000018	IPR004009	Myosin, N-terminal, SH3-like	Domain	GO:0005524
A_000018	IPR004009	Myosin, N-terminal, SH3-like	Domain	GO:0016459
A_000018	noIPR	unintegrated	unintegrated	PTHR13140 (PANTHER)
A_000018	noIPR	unintegrated	unintegrated	SSF52540 (SUPERFAMILY)
A_000018	noIPR	unintegrated	unintegrated
A_000020	noIPR	unintegrated	unintegrated	seg (SEG)
A_000020	noIPR	unintegrated	unintegrated	SignalP-NN(euk) (SIGNALP)
A_000020	noIPR	unintegrated	unintegrated
A_000021	noIPR	unintegrated	unintegrated	SignalP-NN(euk) (SIGNALP)
A_000021	noIPR	unintegrated	unintegrated
A_000022	IPR004001	Actin, conserved site	Conserved_site	PS00432 (PROSITE)
A_000022	IPR004001	Actin, conserved site	Conserved_site	GO:0005524
A_000022	IPR004000	Actin-like	Family	PTHR11937 (PANTHER)
A_000022	IPR004000	Actin-like	Family	PF00022 (PFAM)
A_000022	IPR004000	Actin-like	Family	SM00268 (SMART)
A_000022	IPR004000	Actin-like	Family
A_000022	noIPR	unintegrated	unintegrated	G3DSA:3.30.420.40 (GENE3D)
A_000022	noIPR	unintegrated	unintegrated	G3DSA:3.90.640.10 (GENE3D)
A_000022	noIPR	unintegrated	unintegrated	seg (SEG)
A_000022	noIPR	unintegrated	unintegrated	SSF53067 (SUPERFAMILY)
A_000022	noIPR	unintegrated	unintegrated
A_000023	noIPR	unintegrated	unintegrated	seg (SEG)
A_000023	noIPR	unintegrated	unintegrated
A_000024	noIPR	unintegrated	unintegrated	seg (SEG)
A_000024	noIPR	unintegrated	unintegrated
A_000027	noIPR	unintegrated	unintegrated	SignalP-NN(euk) (SIGNALP)
A_000027	noIPR	unintegrated	unintegrated
A_000029	IPR001978	Troponin	Family	PF00992 (PFAM)
A_000029	IPR001978	Troponin	Family
A_000029	noIPR	unintegrated	unintegrated	coil (COIL)
A_000029	noIPR	unintegrated	unintegrated	G3DSA:1.20.5.350 (GENE3D)
A_000029	noIPR	unintegrated	unintegrated	PTHR11521 (PANTHER)
A_000029	noIPR	unintegrated	unintegrated	seg (SEG)
A_000029	noIPR	unintegrated	unintegrated
A_000030	IPR001978	Troponin	Family	PF00992 (PFAM)
A_000030	IPR001978	Troponin	Family
A_000030	noIPR	unintegrated	unintegrated	coil (COIL)
A_000030	noIPR	unintegrated	unintegrated	G3DSA:1.20.5.350 (GENE3D)
A_000030	noIPR	unintegrated	unintegrated	PTHR11521 (PANTHER)
A_000030	noIPR	unintegrated	unintegrated	seg (SEG)
A_000030	noIPR	unintegrated	unintegrated
A_000031	IPR001978	Troponin	Family	PF00992 (PFAM)
A_000031	IPR001978	Troponin	Family
A_000031	noIPR	unintegrated	unintegrated	coil (COIL)
A_000031	noIPR	unintegrated	unintegrated	G3DSA:1.20.5.350 (GENE3D)
A_000031	noIPR	unintegrated	unintegrated	PTHR11521 (PANTHER)
A_000031	noIPR	unintegrated	unintegrated	seg (SEG)
A_000031	noIPR	unintegrated	unintegrated
A_000032	IPR001978	Troponin	Family	PF00992 (PFAM)
A_000032	IPR001978	Troponin	Family
A_000032	noIPR	unintegrated	unintegrated	coil (COIL)
A_000032	noIPR	unintegrated	unintegrated	G3DSA:1.20.5.350 (GENE3D)
A_000032	noIPR	unintegrated	unintegrated	PTHR11521 (PANTHER)
A_000032	noIPR	unintegrated	unintegrated	seg (SEG)
A_000032	noIPR	unintegrated	unintegrated
A_000033	IPR001978	Troponin	Family	PF00992 (PFAM)
A_000033	IPR001978	Troponin	Family
A_000033	noIPR	unintegrated	unintegrated	coil (COIL)
A_000033	noIPR	unintegrated	unintegrated	G3DSA:1.20.5.350 (GENE3D)
A_000033	noIPR	unintegrated	unintegrated	PTHR11521 (PANTHER)
A_000033	noIPR	unintegrated	unintegrated	seg (SEG)
A_000033	noIPR	unintegrated	unintegrated
A_000034	noIPR	unintegrated	unintegrated	seg (SEG)
A_000034	noIPR	unintegrated	unintegrated
A_000035	IPR001978	Troponin	Family	PF00992 (PFAM)
A_000035	IPR001978	Troponin	Family
A_000035	noIPR	unintegrated	unintegrated	coil (COIL)
A_000035	noIPR	unintegrated	unintegrated	G3DSA:1.20.5.350 (GENE3D)
A_000035	noIPR	unintegrated	unintegrated	PTHR11521 (PANTHER)
A_000035	noIPR	unintegrated	unintegrated	seg (SEG)
A_000035	noIPR	unintegrated	unintegrated
A_000036	noIPR	unintegrated	unintegrated	seg (SEG)
A_000036	noIPR	unintegrated	unintegrated	tmhmm (TMHMM)
A_000036	noIPR	unintegrated	unintegrated
A_000037	IPR001978	Troponin	Family	PF00992 (PFAM)
A_000037	IPR001978	Troponin	Family
A_000037	noIPR	unintegrated	unintegrated	coil (COIL)
A_000037	noIPR	unintegrated	unintegrated	G3DSA:1.20.5.350 (GENE3D)
A_000037	noIPR	unintegrated	unintegrated	PTHR11521 (PANTHER)
A_000037	noIPR	unintegrated	unintegrated	seg (SEG)
A_000037	noIPR	unintegrated	unintegrated
A_000038	IPR001978	Troponin	Family	PF00992 (PFAM)
A_000038	IPR001978	Troponin	Family
A_000038	noIPR	unintegrated	unintegrated	coil (COIL)
A_000038	noIPR	unintegrated	unintegrated	G3DSA:1.20.5.350 (GENE3D)
A_000038	noIPR	unintegrated	unintegrated	PTHR11521 (PANTHER)
A_000038	noIPR	unintegrated	unintegrated	seg (SEG)
A_000038	noIPR	unintegrated	unintegrated
A_000039	noIPR	unintegrated	unintegrated	seg (SEG)
A_000039	noIPR	unintegrated	unintegrated
A_000040	noIPR	unintegrated	unintegrated	seg (SEG)
A_000040	noIPR	unintegrated	unintegrated	SignalP-NN(euk) (SIGNALP)
A_000040	noIPR	unintegrated	unintegrated	tmhmm (TMHMM)
A_000040	noIPR	unintegrated	unintegrated
A_000041	IPR001978	Troponin	Family	PF00992 (PFAM)
A_000041	IPR001978	Troponin	Family
A_000041	noIPR	unintegrated	unintegrated	coil (COIL)
A_000041	noIPR	unintegrated	unintegrated	G3DSA:1.20.5.350 (GENE3D)
A_000041	noIPR	unintegrated	unintegrated	PTHR11521 (PANTHER)
A_000041	noIPR	unintegrated	unintegrated	seg (SEG)
A_000041	noIPR	unintegrated	unintegrated
A_000042	IPR001978	Troponin	Family	PF00992 (PFAM)
A_000042	IPR001978	Troponin	Family
A_000042	noIPR	unintegrated	unintegrated	coil (COIL)
A_000042	noIPR	unintegrated	unintegrated	G3DSA:1.20.5.350 (GENE3D)
A_000042	noIPR	unintegrated	unintegrated	PTHR11521 (PANTHER)
A_000042	noIPR	unintegrated	unintegrated	seg (SEG)
A_000042	noIPR	unintegrated	unintegrated
A_000043	IPR001978	Troponin	Family	PF00992 (PFAM)
A_000043	IPR001978	Troponin	Family
A_000043	noIPR	unintegrated	unintegrated	coil (COIL)
A_000043	noIPR	unintegrated	unintegrated	G3DSA:1.20.5.350 (GENE3D)
A_000043	noIPR	unintegrated	unintegrated	PTHR11521 (PANTHER)
A_000043	noIPR	unintegrated	unintegrated	seg (SEG)
A_000043	noIPR	unintegrated	unintegrated
A_000044	IPR001978	Troponin	Family	PF00992 (PFAM)
A_000044	IPR001978	Troponin	Family
A_000044	noIPR	unintegrated	unintegrated	coil (COIL)
A_000044	noIPR	unintegrated	unintegrated	G3DSA:1.20.5.350 (GENE3D)
A_000044	noIPR	unintegrated	unintegrated	PTHR11521 (PANTHER)
A_000044	noIPR	unintegrated	unintegrated	seg (SEG)
A_000044	noIPR	unintegrated	unintegrated
A_000045	IPR001978	Troponin	Family	PF00992 (PFAM)
A_000045	IPR001978	Troponin	Family
A_000045	noIPR	unintegrated	unintegrated	coil (COIL)
A_000045	noIPR	unintegrated	unintegrated	G3DSA:1.20.5.350 (GENE3D)
A_000045	noIPR	unintegrated	unintegrated	PTHR11521 (PANTHER)
A_000045	noIPR	unintegrated	unintegrated	seg (SEG)
A_000045	noIPR	unintegrated	unintegrated
A_000046	IPR001978	Troponin	Family	PF00992 (PFAM)
A_000046	IPR001978	Troponin	Family
A_000046	noIPR	unintegrated	unintegrated	coil (COIL)
A_000046	noIPR	unintegrated	unintegrated	G3DSA:1.20.5.350 (GENE3D)
A_000046	noIPR	unintegrated	unintegrated	PTHR11521 (PANTHER)
A_000046	noIPR	unintegrated	unintegrated	seg (SEG)
A_000046	noIPR	unintegrated	unintegrated
A_000047	IPR001978	Troponin	Family	PF00992 (PFAM)
A_000047	IPR001978	Troponin	Family
A_000047	noIPR	unintegrated	unintegrated	coil (COIL)
A_000047	noIPR	unintegrated	unintegrated	G3DSA:1.20.5.350 (GENE3D)
A_000047	noIPR	unintegrated	unintegrated	PTHR11521 (PANTHER)
A_000047	noIPR	unintegrated	unintegrated	seg (SEG)
A_000047	noIPR	unintegrated	unintegrated
A_000048	noIPR	unintegrated	unintegrated	seg (SEG)
A_000048	noIPR	unintegrated	unintegrated	tmhmm (TMHMM)
A_000048	noIPR	unintegrated	unintegrated
A_000049	IPR001978	Troponin	Family	PF00992 (PFAM)
A_000049	IPR001978	Troponin	Family
A_000049	noIPR	unintegrated	unintegrated	coil (COIL)
A_000049	noIPR	unintegrated	unintegrated	G3DSA:1.20.5.350 (GENE3D)
A_000049	noIPR	unintegrated	unintegrated	PTHR11521 (PANTHER)
A_000049	noIPR	unintegrated	unintegrated	seg (SEG)
A_000049	noIPR	unintegrated	unintegrated
A_000050	noIPR	unintegrated	unintegrated	seg (SEG)
A_000050	noIPR	unintegrated	unintegrated	tmhmm (TMHMM)
A_000050	noIPR	unintegrated	unintegrated
A_000051	IPR001978	Troponin	Family	PF00992 (PFAM)
A_000051	IPR001978	Troponin	Family
A_000051	noIPR	unintegrated	unintegrated	coil (COIL)
A_000051	noIPR	unintegrated	unintegrated	G3DSA:1.20.5.350 (GENE3D)
A_000051	noIPR	unintegrated	unintegrated	PTHR11521 (PANTHER)
A_000051	noIPR	unintegrated	unintegrated	seg (SEG)
A_000051	noIPR	unintegrated	unintegrated
A_000052	IPR001978	Troponin	Family	PF00992 (PFAM)
A_000052	IPR001978	Troponin	Family
A_000052	noIPR	unintegrated	unintegrated	coil (COIL)
A_000052	noIPR	unintegrated	unintegrated	G3DSA:1.20.5.350 (GENE3D)
A_000052	noIPR	unintegrated	unintegrated	PTHR11521 (PANTHER)
A_000052	noIPR	unintegrated	unintegrated	seg (SEG)
A_000052	noIPR	unintegrated	unintegrated
A_000053	noIPR	unintegrated	unintegrated	seg (SEG)
A_000053	noIPR	unintegrated	unintegrated	tmhmm (TMHMM)
A_000053	noIPR	unintegrated	unintegrated
A_000054	noIPR	unintegrated	unintegrated	seg (SEG)
A_000054	noIPR	unintegrated	unintegrated	tmhmm (TMHMM)
A_000054	noIPR	unintegrated	unintegrated
A_000055	IPR001978	Troponin	Family	PF00992 (PFAM)
A_000055	IPR001978	Troponin	Family
A_000055	noIPR	unintegrated	unintegrated	coil (COIL)
A_000055	noIPR	unintegrated	unintegrated	G3DSA:1.20.5.350 (GENE3D)
A_000055	noIPR	unintegrated	unintegrated	PTHR11521 (PANTHER)
A_000055	noIPR	unintegrated	unintegrated	seg (SEG)
A_000055	noIPR	unintegrated	unintegrated
A_000056	IPR001978	Troponin	Family	PF00992 (PFAM)
A_000056	IPR001978	Troponin	Family
A_000056	noIPR	unintegrated	unintegrated	coil (COIL)
A_000056	noIPR	unintegrated	unintegrated	G3DSA:1.20.5.350 (GENE3D)
A_000056	noIPR	unintegrated	unintegrated	PTHR11521 (PANTHER)
A_000056	noIPR	unintegrated	unintegrated	seg (SEG)
A_000056	noIPR	unintegrated	unintegrated
A_000057	IPR001978	Troponin	Family	PF00992 (PFAM)
A_000057	IPR001978	Troponin	Family
A_000057	noIPR	unintegrated	unintegrated	coil (COIL)
A_000057	noIPR	unintegrated	unintegrated	G3DSA:1.20.5.350 (GENE3D)
A_000057	noIPR	unintegrated	unintegrated	PTHR11521 (PANTHER)
A_000057	noIPR	unintegrated	unintegrated	seg (SEG)
A_000057	noIPR	unintegrated	unintegrated
A_000058	IPR001978	Troponin	Family	PF00992 (PFAM)
A_000058	IPR001978	Troponin	Family
A_000058	noIPR	unintegrated	unintegrated	coil (COIL)
A_000058	noIPR	unintegrated	unintegrated	G3DSA:1.20.5.350 (GENE3D)
A_000058	noIPR	unintegrated	unintegrated	PTHR11521 (PANTHER)
A_000058	noIPR	unintegrated	unintegrated	seg (SEG)
A_000058	noIPR	unintegrated	unintegrated
A_000059	IPR001978	Troponin	Family	PF00992 (PFAM)
A_000059	IPR001978	Troponin	Family
A_000059	noIPR	unintegrated	unintegrated	coil (COIL)
A_000059	noIPR	unintegrated	unintegrated	G3DSA:1.20.5.350 (GENE3D)
A_000059	noIPR	unintegrated	unintegrated	PTHR11521 (PANTHER)
A_000059	noIPR	unintegrated	unintegrated	seg (SEG)
A_000059	noIPR	unintegrated	unintegrated
A_000060	IPR001978	Troponin	Family	PF00992 (PFAM)
A_000060	IPR001978	Troponin	Family
A_000060	noIPR	unintegrated	unintegrated	coil (COIL)
A_000060	noIPR	unintegrated	unintegrated	G3DSA:1.20.5.350 (GENE3D)
A_000060	noIPR	unintegrated	unintegrated	PTHR11521 (PANTHER)
A_000060	noIPR	unintegrated	unintegrated	seg (SEG)
A_000060	noIPR	unintegrated	unintegrated
A_000061	IPR001978	Troponin	Family	PF00992 (PFAM)
A_000061	IPR001978	Troponin	Family
A_000061	noIPR	unintegrated	unintegrated	coil (COIL)
A_000061	noIPR	unintegrated	unintegrated	G3DSA:1.20.5.350 (GENE3D)
A_000061	noIPR	unintegrated	unintegrated	PTHR11521 (PANTHER)
A_000061	noIPR	unintegrated	unintegrated	seg (SEG)
A_000061	noIPR	unintegrated	unintegrated
A_000062	IPR001978	Troponin	Family	PF00992 (PFAM)
A_000062	IPR001978	Troponin	Family
A_000062	noIPR	unintegrated	unintegrated	coil (COIL)
A_000062	noIPR	unintegrated	unintegrated	G3DSA:1.20.5.350 (GENE3D)
A_000062	noIPR	unintegrated	unintegrated	PTHR11521 (PANTHER)
A_000062	noIPR	unintegrated	unintegrated	seg (SEG)
A_000062	noIPR	unintegrated	unintegrated
A_000063	IPR001978	Troponin	Family	PF00992 (PFAM)
A_000063	IPR001978	Troponin	Family
A_000063	noIPR	unintegrated	unintegrated	coil (COIL)
A_000063	noIPR	unintegrated	unintegrated	G3DSA:1.20.5.350 (GENE3D)
A_000063	noIPR	unintegrated	unintegrated	PTHR11521 (PANTHER)
A_000063	noIPR	unintegrated	unintegrated	seg (SEG)
A_000063	noIPR	unintegrated	unintegrated
A_000064	IPR001978	Troponin	Family	PF00992 (PFAM)
A_000064	IPR001978	Troponin	Family
A_000064	noIPR	unintegrated	unintegrated	coil (COIL)
A_000064	noIPR	unintegrated	unintegrated	G3DSA:1.20.5.350 (GENE3D)
A_000064	noIPR	unintegrated	unintegrated	PTHR11521 (PANTHER)
A_000064	noIPR	unintegrated	unintegrated	seg (SEG)
A_000064	noIPR	unintegrated	unintegrated
A_000065	noIPR	unintegrated	unintegrated	PTHR23304 (PANTHER)
A_000065	noIPR	unintegrated	unintegrated	seg (SEG)
A_000065	noIPR	unintegrated	unintegrated	tmhmm (TMHMM)
A_000065	noIPR	unintegrated	unintegrated
A_000066	noIPR	unintegrated	unintegrated	PTHR23304 (PANTHER)
A_000066	noIPR	unintegrated	unintegrated	seg (SEG)
A_000066	noIPR	unintegrated	unintegrated	tmhmm (TMHMM)
A_000066	noIPR	unintegrated	unintegrated
A_000067	noIPR	unintegrated	unintegrated	PTHR23304 (PANTHER)
A_000067	noIPR	unintegrated	unintegrated	seg (SEG)
A_000067	noIPR	unintegrated	unintegrated	tmhmm (TMHMM)
A_000067	noIPR	unintegrated	unintegrated
A_000068	noIPR	unintegrated	unintegrated	coil (COIL)
A_000068	noIPR	unintegrated	unintegrated	G3DSA:1.20.1070.10 (GENE3D)
A_000068	noIPR	unintegrated	unintegrated	PTHR23304 (PANTHER)
A_000068	noIPR	unintegrated	unintegrated	seg (SEG)
A_000068	noIPR	unintegrated	unintegrated	tmhmm (TMHMM)
A_000068	noIPR	unintegrated	unintegrated
A_000069	noIPR	unintegrated	unintegrated	seg (SEG)
A_000069	noIPR	unintegrated	unintegrated	tmhmm (TMHMM)
A_000069	noIPR	unintegrated	unintegrated
A_000070	noIPR	unintegrated	unintegrated	seg (SEG)
A_000070	noIPR	unintegrated	unintegrated	tmhmm (TMHMM)
A_000070	noIPR	unintegrated	unintegrated
A_000071	noIPR	unintegrated	unintegrated	seg (SEG)
A_000071	noIPR	unintegrated	unintegrated	SignalP-NN(euk) (SIGNALP)
A_000071	noIPR	unintegrated	unintegrated	tmhmm (TMHMM)
A_000071	noIPR	unintegrated	unintegrated
A_000072	noIPR	unintegrated	unintegrated	seg (SEG)
A_000072	noIPR	unintegrated	unintegrated	SignalP-NN(euk) (SIGNALP)
A_000072	noIPR	unintegrated	unintegrated	tmhmm (TMHMM)
A_000072	noIPR	unintegrated	unintegrated
A_000073	noIPR	unintegrated	unintegrated	seg (SEG)
A_000073	noIPR	unintegrated	unintegrated	tmhmm (TMHMM)
A_000073	noIPR	unintegrated	unintegrated
A_000074	noIPR	unintegrated	unintegrated	seg (SEG)
A_000074	noIPR	unintegrated	unintegrated	SignalP-NN(euk) (SIGNALP)
A_000074	noIPR	unintegrated	unintegrated	tmhmm (TMHMM)
A_000074	noIPR	unintegrated	unintegrated
A_000075	noIPR	unintegrated	unintegrated	seg (SEG)
A_000075	noIPR	unintegrated	unintegrated	SignalP-NN(euk) (SIGNALP)
A_000075	noIPR	unintegrated	unintegrated	tmhmm (TMHMM)
A_000075	noIPR	unintegrated	unintegrated
A_000076	noIPR	unintegrated	unintegrated	seg (SEG)
A_000076	noIPR	unintegrated	unintegrated	SignalP-NN(euk) (SIGNALP)
A_000076	noIPR	unintegrated	unintegrated	tmhmm (TMHMM)
A_000076	noIPR	unintegrated	unintegrated
A_000077	noIPR	unintegrated	unintegrated	seg (SEG)
A_000077	noIPR	unintegrated	unintegrated	tmhmm (TMHMM)
A_000077	noIPR	unintegrated	unintegrated
A_000078	noIPR	unintegrated	unintegrated	seg (SEG)
A_000078	noIPR	unintegrated	unintegrated	SignalP-NN(euk) (SIGNALP)
A_000078	noIPR	unintegrated	unintegrated	tmhmm (TMHMM)
A_000078	noIPR	unintegrated	unintegrated
A_000079	noIPR	unintegrated	unintegrated	seg (SEG)
A_000079	noIPR	unintegrated	unintegrated	SignalP-NN(euk) (SIGNALP)
A_000079	noIPR	unintegrated	unintegrated	tmhmm (TMHMM)
A_000079	noIPR	unintegrated	unintegrated
A_000080	noIPR	unintegrated	unintegrated	seg (SEG)
A_000080	noIPR	unintegrated	unintegrated	SignalP-NN(euk) (SIGNALP)
A_000080	noIPR	unintegrated	unintegrated	tmhmm (TMHMM)
A_000080	noIPR	unintegrated	unintegrated
A_000081	noIPR	unintegrated	unintegrated	seg (SEG)
A_000081	noIPR	unintegrated	unintegrated	SignalP-NN(euk) (SIGNALP)
A_000081	noIPR	unintegrated	unintegrated	tmhmm (TMHMM)
A_000081	noIPR	unintegrated	unintegrated
A_000082	noIPR	unintegrated	unintegrated	seg (SEG)
A_000082	noIPR	unintegrated	unintegrated	SignalP-NN(euk) (SIGNALP)
A_000082	noIPR	unintegrated	unintegrated	tmhmm (TMHMM)
A_000082	noIPR	unintegrated	unintegrated
A_000083	noIPR	unintegrated	unintegrated	seg (SEG)
A_000083	noIPR	unintegrated	unintegrated	SignalP-NN(euk) (SIGNALP)
A_000083	noIPR	unintegrated	unintegrated	tmhmm (TMHMM)
A_000083	noIPR	unintegrated	unintegrated
A_000084	noIPR	unintegrated	unintegrated	seg (SEG)
A_000084	noIPR	unintegrated	unintegrated	SignalP-NN(euk) (SIGNALP)
A_000084	noIPR	unintegrated	unintegrated	tmhmm (TMHMM)
A_000084	noIPR	unintegrated	unintegrated
A_000085	noIPR	unintegrated	unintegrated	seg (SEG)
A_000085	noIPR	unintegrated	unintegrated	SignalP-NN(euk) (SIGNALP)
A_000085	noIPR	unintegrated	unintegrated	tmhmm (TMHMM)
A_000085	noIPR	unintegrated	unintegrated
A_000086	noIPR	unintegrated	unintegrated	seg (SEG)
A_000086	noIPR	unintegrated	unintegrated	SignalP-NN(euk) (SIGNALP)
A_000086	noIPR	unintegrated	unintegrated	tmhmm (TMHMM)
A_000086	noIPR	unintegrated	unintegrated
A_000087	noIPR	unintegrated	unintegrated	PTHR23304 (PANTHER)
A_000087	noIPR	unintegrated	unintegrated	seg (SEG)
A_000087	noIPR	unintegrated	unintegrated	SignalP-NN(euk) (SIGNALP)
A_000087	noIPR	unintegrated	unintegrated	tmhmm (TMHMM)
A_000087	noIPR	unintegrated	unintegrated
A_000088	noIPR	unintegrated	unintegrated	seg (SEG)
A_000088	noIPR	unintegrated	unintegrated	tmhmm (TMHMM)
A_000088	noIPR	unintegrated	unintegrated
A_000089	noIPR	unintegrated	unintegrated	seg (SEG)
A_000089	noIPR	unintegrated	unintegrated	SignalP-NN(euk) (SIGNALP)
A_000089	noIPR	unintegrated	unintegrated	tmhmm (TMHMM)
A_000089	noIPR	unintegrated	unintegrated
A_000090	noIPR	unintegrated	unintegrated	PTHR23304 (PANTHER)
A_000090	noIPR	unintegrated	unintegrated	seg (SEG)
A_000090	noIPR	unintegrated	unintegrated	SignalP-NN(euk) (SIGNALP)
A_000090	noIPR	unintegrated	unintegrated	tmhmm (TMHMM)
A_000090	noIPR	unintegrated	unintegrated
A_000091	noIPR	unintegrated	unintegrated	seg (SEG)
A_000091	noIPR	unintegrated	unintegrated	SignalP-NN(euk) (SIGNALP)
A_000091	noIPR	unintegrated	unintegrated	tmhmm (TMHMM)
A_000091	noIPR	unintegrated	unintegrated
A_000092	noIPR	unintegrated	unintegrated	seg (SEG)
A_000092	noIPR	unintegrated	unintegrated	SignalP-NN(euk) (SIGNALP)
A_000092	noIPR	unintegrated	unintegrated	tmhmm (TMHMM)
A_000092	noIPR	unintegrated	unintegrated
A_000093	noIPR	unintegrated	unintegrated	seg (SEG)
A_000093	noIPR	unintegrated	unintegrated	SignalP-NN(euk) (SIGNALP)
A_000093	noIPR	unintegrated	unintegrated	tmhmm (TMHMM)
A_000093	noIPR	unintegrated	unintegrated
A_000094	noIPR	unintegrated	unintegrated	seg (SEG)
A_000094	noIPR	unintegrated	unintegrated	SignalP-NN(euk) (SIGNALP)
A_000094	noIPR	unintegrated	unintegrated	tmhmm (TMHMM)
A_000094	noIPR	unintegrated	unintegrated
A_000095	noIPR	unintegrated	unintegrated	seg (SEG)
A_000095	noIPR	unintegrated	unintegrated	SignalP-NN(euk) (SIGNALP)
A_000095	noIPR	unintegrated	unintegrated	tmhmm (TMHMM)
A_000095	noIPR	unintegrated	unintegrated
A_000096	noIPR	unintegrated	unintegrated	seg (SEG)
A_000096	noIPR	unintegrated	unintegrated	SignalP-NN(euk) (SIGNALP)
A_000096	noIPR	unintegrated	unintegrated	tmhmm (TMHMM)
A_000096	noIPR	unintegrated	unintegrated
A_000097	noIPR	unintegrated	unintegrated	seg (SEG)
A_000097	noIPR	unintegrated	unintegrated	SignalP-NN(euk) (SIGNALP)
A_000097	noIPR	unintegrated	unintegrated	tmhmm (TMHMM)
A_000097	noIPR	unintegrated	unintegrated
A_000098	noIPR	unintegrated	unintegrated	PTHR23304 (PANTHER)
A_000098	noIPR	unintegrated	unintegrated	seg (SEG)
A_000098	noIPR	unintegrated	unintegrated	SignalP-NN(euk) (SIGNALP)
A_000098	noIPR	unintegrated	unintegrated	tmhmm (TMHMM)
A_000098	noIPR	unintegrated	unintegrated
A_000099	noIPR	unintegrated	unintegrated	seg (SEG)
A_000099	noIPR	unintegrated	unintegrated	SignalP-NN(euk) (SIGNALP)
A_000099	noIPR	unintegrated	unintegrated	tmhmm (TMHMM)
A_000099	noIPR	unintegrated	unintegrated
A_000100	noIPR	unintegrated	unintegrated	seg (SEG)
A_000100	noIPR	unintegrated	unintegrated	SignalP-NN(euk) (SIGNALP)
A_000100	noIPR	unintegrated	unintegrated	tmhmm (TMHMM)
A_000100	noIPR	unintegrated	unintegrated
A_000101	IPR011759	Cytochrome C oxidase subunit II, transmembrane domain	Domain	G3DSA:1.10.287.90 (GENE3D)
A_000101	IPR011759	Cytochrome C oxidase subunit II, transmembrane domain	Domain	GO:0004129
A_000101	IPR011759	Cytochrome C oxidase subunit II, transmembrane domain	Domain	GO:0005507
A_000101	IPR011759	Cytochrome C oxidase subunit II, transmembrane domain	Domain	GO:0009055
A_000101	IPR011759	Cytochrome C oxidase subunit II, transmembrane domain	Domain	GO:0016021
A_000101	IPR011759	Cytochrome C oxidase subunit II, transmembrane domain	Domain	GO:0022900
A_000101	noIPR	unintegrated	unintegrated	seg (SEG)
A_000101	noIPR	unintegrated	unintegrated	SignalP-NN(euk) (SIGNALP)
A_000101	noIPR	unintegrated	unintegrated	tmhmm (TMHMM)
A_000101	noIPR	unintegrated	unintegrated
A_000102	noIPR	unintegrated	unintegrated	seg (SEG)
A_000102	noIPR	unintegrated	unintegrated	tmhmm (TMHMM)
A_000102	noIPR	unintegrated	unintegrated
A_000103	noIPR	unintegrated	unintegrated	seg (SEG)
A_000103	noIPR	unintegrated	unintegrated	SignalP-NN(euk) (SIGNALP)
A_000103	noIPR	unintegrated	unintegrated	tmhmm (TMHMM)
A_000103	noIPR	unintegrated	unintegrated
A_000104	IPR008957	Fibronectin type III domain	Domain	SSF49265 (SUPERFAMILY)
A_000104	IPR008957	Fibronectin type III domain	Domain
A_000104	IPR003961	Fibronectin, type III	Domain	PF00041 (PFAM)
A_000104	IPR003961	Fibronectin, type III	Domain	SM00060 (SMART)
A_000104	IPR003961	Fibronectin, type III	Domain	PS50853 (PROFILE)
A_000104	IPR003961	Fibronectin, type III	Domain	GO:0005515
A_000104	IPR013098	Immunoglobulin I-set	Domain	PF07679 (PFAM)
A_000104	IPR013098	Immunoglobulin I-set	Domain
A_000104	IPR003598	Immunoglobulin subtype 2	Domain	SM00408 (SMART)
A_000104	IPR003598	Immunoglobulin subtype 2	Domain
A_000104	IPR007110	Immunoglobulin-like	Domain	PS50835 (PROFILE)
A_000104	IPR007110	Immunoglobulin-like	Domain	GO:0005515
A_000104	IPR013783	Immunoglobulin-like fold	Domain	G3DSA:2.60.40.10 (GENE3D)
A_000104	IPR013783	Immunoglobulin-like fold	Domain
A_000104	IPR020675	Myosin light chain kinase-related	Family	PTHR22964 (PANTHER)
A_000104	IPR020675	Myosin light chain kinase-related	Family
A_000104	IPR000719	Protein kinase, catalytic domain	Domain	PS50011 (PROFILE)
A_000104	IPR000719	Protein kinase, catalytic domain	Domain	GO:0004672
A_000104	IPR000719	Protein kinase, catalytic domain	Domain	GO:0005524
A_000104	IPR000719	Protein kinase, catalytic domain	Domain	GO:0006468
A_000104	IPR011009	Protein kinase-like domain	Domain	SSF56112 (SUPERFAMILY)
A_000104	IPR011009	Protein kinase-like domain	Domain
A_000104	IPR002290	Serine/threonine-protein kinase domain	Domain	SM00220 (SMART)
A_000104	IPR002290	Serine/threonine-protein kinase domain	Domain	GO:0004674
A_000104	IPR002290	Serine/threonine-protein kinase domain	Domain	GO:0005524
A_000104	IPR002290	Serine/threonine-protein kinase domain	Domain	GO:0006468
A_000104	IPR017442	Serine/threonine-protein kinase-like domain	Domain	PF00069 (PFAM)
A_000104	IPR017442	Serine/threonine-protein kinase-like domain	Domain	GO:0004672
A_000104	IPR017442	Serine/threonine-protein kinase-like domain	Domain	GO:0005524
A_000104	IPR017442	Serine/threonine-protein kinase-like domain	Domain	GO:0006468
A_000104	IPR020635	Tyrosine-protein kinase, catalytic domain	Domain	SM00219 (SMART)
A_000104	IPR020635	Tyrosine-protein kinase, catalytic domain	Domain
A_000104	noIPR	unintegrated	unintegrated	G3DSA:1.10.510.10 (GENE3D)
A_000104	noIPR	unintegrated	unintegrated	G3DSA:3.30.200.20 (GENE3D)
A_000104	noIPR	unintegrated	unintegrated	PTHR22964:SF5 (PANTHER)
A_000104	noIPR	unintegrated	unintegrated	seg (SEG)
A_000104	noIPR	unintegrated	unintegrated	SSF48726 (SUPERFAMILY)
A_000104	noIPR	unintegrated	unintegrated
A_000105	IPR000533	Tropomyosin	Family	PR00194 (PRINTS)
A_000105	IPR000533	Tropomyosin	Family	PF00261 (PFAM)
A_000105	IPR000533	Tropomyosin	Family	PS00326 (PROSITE)
A_000105	IPR000533	Tropomyosin	Family
A_000105	noIPR	unintegrated	unintegrated	coil (COIL)
A_000105	noIPR	unintegrated	unintegrated	PTHR19269 (PANTHER)
A_000105	noIPR	unintegrated	unintegrated	PTHR19269:SF11 (PANTHER)
A_000105	noIPR	unintegrated	unintegrated	seg (SEG)
A_000105	noIPR	unintegrated	unintegrated
A_000106	IPR000533	Tropomyosin	Family	PR00194 (PRINTS)
A_000106	IPR000533	Tropomyosin	Family	PF00261 (PFAM)
A_000106	IPR000533	Tropomyosin	Family	PS00326 (PROSITE)
A_000106	IPR000533	Tropomyosin	Family
A_000106	noIPR	unintegrated	unintegrated	coil (COIL)
A_000106	noIPR	unintegrated	unintegrated	PTHR19269 (PANTHER)
A_000106	noIPR	unintegrated	unintegrated	PTHR19269:SF11 (PANTHER)
A_000106	noIPR	unintegrated	unintegrated	seg (SEG)
A_000106	noIPR	unintegrated	unintegrated
A_000107	IPR000533	Tropomyosin	Family	PR00194 (PRINTS)
A_000107	IPR000533	Tropomyosin	Family	PF00261 (PFAM)
A_000107	IPR000533	Tropomyosin	Family	PS00326 (PROSITE)
A_000107	IPR000533	Tropomyosin	Family
A_000107	noIPR	unintegrated	unintegrated	coil (COIL)
A_000107	noIPR	unintegrated	unintegrated	PTHR19269 (PANTHER)
A_000107	noIPR	unintegrated	unintegrated	PTHR19269:SF11 (PANTHER)
A_000107	noIPR	unintegrated	unintegrated	seg (SEG)
A_000107	noIPR	unintegrated	unintegrated
A_000108	IPR000533	Tropomyosin	Family	PR00194 (PRINTS)
A_000108	IPR000533	Tropomyosin	Family	PF00261 (PFAM)
A_000108	IPR000533	Tropomyosin	Family	PS00326 (PROSITE)
A_000108	IPR000533	Tropomyosin	Family
A_000108	noIPR	unintegrated	unintegrated	coil (COIL)
A_000108	noIPR	unintegrated	unintegrated	PTHR19269 (PANTHER)
A_000108	noIPR	unintegrated	unintegrated	PTHR19269:SF11 (PANTHER)
A_000108	noIPR	unintegrated	unintegrated	seg (SEG)
A_000108	noIPR	unintegrated	unintegrated
A_000109	IPR000533	Tropomyosin	Family	PR00194 (PRINTS)
A_000109	IPR000533	Tropomyosin	Family	PF00261 (PFAM)
A_000109	IPR000533	Tropomyosin	Family	PS00326 (PROSITE)
A_000109	IPR000533	Tropomyosin	Family
A_000109	noIPR	unintegrated	unintegrated	coil (COIL)
A_000109	noIPR	unintegrated	unintegrated	PTHR19269 (PANTHER)
A_000109	noIPR	unintegrated	unintegrated	PTHR19269:SF11 (PANTHER)
A_000109	noIPR	unintegrated	unintegrated	seg (SEG)
A_000109	noIPR	unintegrated	unintegrated
A_000110	IPR000533	Tropomyosin	Family	PR00194 (PRINTS)
A_000110	IPR000533	Tropomyosin	Family	PF00261 (PFAM)
A_000110	IPR000533	Tropomyosin	Family	PS00326 (PROSITE)
A_000110	IPR000533	Tropomyosin	Family
A_000110	noIPR	unintegrated	unintegrated	coil (COIL)
A_000110	noIPR	unintegrated	unintegrated	PTHR19269 (PANTHER)
A_000110	noIPR	unintegrated	unintegrated	PTHR19269:SF11 (PANTHER)
A_000110	noIPR	unintegrated	unintegrated	seg (SEG)
A_000110	noIPR	unintegrated	unintegrated
A_000111	IPR000533	Tropomyosin	Family	PR00194 (PRINTS)
A_000111	IPR000533	Tropomyosin	Family	PF00261 (PFAM)
A_000111	IPR000533	Tropomyosin	Family	PS00326 (PROSITE)
A_000111	IPR000533	Tropomyosin	Family
A_000111	noIPR	unintegrated	unintegrated	coil (COIL)
A_000111	noIPR	unintegrated	unintegrated	PTHR19269 (PANTHER)
A_000111	noIPR	unintegrated	unintegrated	PTHR19269:SF11 (PANTHER)
A_000111	noIPR	unintegrated	unintegrated	seg (SEG)
A_000111	noIPR	unintegrated	unintegrated
A_000112	IPR000533	Tropomyosin	Family	PR00194 (PRINTS)
A_000112	IPR000533	Tropomyosin	Family	PF00261 (PFAM)
A_000112	IPR000533	Tropomyosin	Family	PS00326 (PROSITE)
A_000112	IPR000533	Tropomyosin	Family
A_000112	noIPR	unintegrated	unintegrated	coil (COIL)
A_000112	noIPR	unintegrated	unintegrated	PTHR19269 (PANTHER)
A_000112	noIPR	unintegrated	unintegrated	PTHR19269:SF11 (PANTHER)
A_000112	noIPR	unintegrated	unintegrated	seg (SEG)
A_000112	noIPR	unintegrated	unintegrated
A_000113	IPR000533	Tropomyosin	Family	PR00194 (PRINTS)
A_000113	IPR000533	Tropomyosin	Family	PF00261 (PFAM)
A_000113	IPR000533	Tropomyosin	Family	PS00326 (PROSITE)
A_000113	IPR000533	Tropomyosin	Family
A_000113	noIPR	unintegrated	unintegrated	coil (COIL)
A_000113	noIPR	unintegrated	unintegrated	PTHR19269 (PANTHER)
A_000113	noIPR	unintegrated	unintegrated	PTHR19269:SF11 (PANTHER)
A_000113	noIPR	unintegrated	unintegrated	seg (SEG)
A_000113	noIPR	unintegrated	unintegrated
A_000114	IPR000533	Tropomyosin	Family	PR00194 (PRINTS)
A_000114	IPR000533	Tropomyosin	Family	PF00261 (PFAM)
A_000114	IPR000533	Tropomyosin	Family	PS00326 (PROSITE)
A_000114	IPR000533	Tropomyosin	Family
A_000114	noIPR	unintegrated	unintegrated	coil (COIL)
A_000114	noIPR	unintegrated	unintegrated	PTHR19269 (PANTHER)
A_000114	noIPR	unintegrated	unintegrated	PTHR19269:SF11 (PANTHER)
A_000114	noIPR	unintegrated	unintegrated	seg (SEG)
A_000114	noIPR	unintegrated	unintegrated
A_000115	noIPR	unintegrated	unintegrated	seg (SEG)
A_000115	noIPR	unintegrated	unintegrated	SignalP-NN(euk) (SIGNALP)
A_000115	noIPR	unintegrated	unintegrated
A_000116	noIPR	unintegrated	unintegrated	seg (SEG)
A_000116	noIPR	unintegrated	unintegrated	SignalP-NN(euk) (SIGNALP)
A_000116	noIPR	unintegrated	unintegrated
A_000118	IPR000533	Tropomyosin	Family	PR00194 (PRINTS)
A_000118	IPR000533	Tropomyosin	Family	PF00261 (PFAM)
A_000118	IPR000533	Tropomyosin	Family
A_000118	noIPR	unintegrated	unintegrated	coil (COIL)
A_000118	noIPR	unintegrated	unintegrated	G3DSA:1.20.5.340 (GENE3D)
A_000118	noIPR	unintegrated	unintegrated	PTHR19269 (PANTHER)
A_000118	noIPR	unintegrated	unintegrated	PTHR19269:SF11 (PANTHER)
A_000118	noIPR	unintegrated	unintegrated	seg (SEG)
A_000118	noIPR	unintegrated	unintegrated
A_000120	IPR002048	Calcium-binding EF-hand	Repeat	SM00054 (SMART)
A_000120	IPR002048	Calcium-binding EF-hand	Repeat	GO:0005509
A_000120	IPR018247	EF-Hand 1, calcium-binding site	Binding_site	PS00018 (PROSITE)
A_000120	IPR018247	EF-Hand 1, calcium-binding site	Binding_site
A_000120	IPR018249	EF-HAND 2	Repeat	PS50222 (PROFILE)
A_000120	IPR018249	EF-HAND 2	Repeat
A_000120	IPR011992	EF-hand-like domain	Domain	G3DSA:1.10.238.10 (GENE3D)
A_000120	IPR011992	EF-hand-like domain	Domain	GO:0005509
A_000120	noIPR	unintegrated	unintegrated	PTHR10891 (PANTHER)
A_000120	noIPR	unintegrated	unintegrated	seg (SEG)
A_000120	noIPR	unintegrated	unintegrated	SSF47473 (SUPERFAMILY)
A_000120	noIPR	unintegrated	unintegrated
A_000121	IPR018247	EF-Hand 1, calcium-binding site	Binding_site	PS00018 (PROSITE)
A_000121	IPR018247	EF-Hand 1, calcium-binding site	Binding_site
A_000121	IPR018249	EF-HAND 2	Repeat	PS50222 (PROFILE)
A_000121	IPR018249	EF-HAND 2	Repeat
A_000121	IPR011992	EF-hand-like domain	Domain	G3DSA:1.10.238.10 (GENE3D)
A_000121	IPR011992	EF-hand-like domain	Domain	GO:0005509
A_000121	noIPR	unintegrated	unintegrated	seg (SEG)
A_000121	noIPR	unintegrated	unintegrated	SSF47473 (SUPERFAMILY)
A_000121	noIPR	unintegrated	unintegrated
A_000122	IPR002048	Calcium-binding EF-hand	Repeat	SM00054 (SMART)
A_000122	IPR002048	Calcium-binding EF-hand	Repeat	GO:0005509
A_000122	IPR018247	EF-Hand 1, calcium-binding site	Binding_site	PS00018 (PROSITE)
A_000122	IPR018247	EF-Hand 1, calcium-binding site	Binding_site
A_000122	IPR018249	EF-HAND 2	Repeat	PS50222 (PROFILE)
A_000122	IPR018249	EF-HAND 2	Repeat
A_000122	IPR011992	EF-hand-like domain	Domain	G3DSA:1.10.238.10 (GENE3D)
A_000122	IPR011992	EF-hand-like domain	Domain	GO:0005509
A_000122	noIPR	unintegrated	unintegrated	PTHR10827 (PANTHER)
A_000122	noIPR	unintegrated	unintegrated	seg (SEG)
A_000122	noIPR	unintegrated	unintegrated	SSF47473 (SUPERFAMILY)
A_000122	noIPR	unintegrated	unintegrated
A_000123	IPR002048	Calcium-binding EF-hand	Repeat	SM00054 (SMART)
A_000123	IPR002048	Calcium-binding EF-hand	Repeat	GO:0005509
A_000123	IPR018247	EF-Hand 1, calcium-binding site	Binding_site	PS00018 (PROSITE)
A_000123	IPR018247	EF-Hand 1, calcium-binding site	Binding_site
A_000123	IPR018249	EF-HAND 2	Repeat	PS50222 (PROFILE)
A_000123	IPR018249	EF-HAND 2	Repeat
A_000123	IPR011992	EF-hand-like domain	Domain	G3DSA:1.10.238.10 (GENE3D)
A_000123	IPR011992	EF-hand-like domain	Domain	GO:0005509
A_000123	noIPR	unintegrated	unintegrated	PTHR10891 (PANTHER)
A_000123	noIPR	unintegrated	unintegrated	seg (SEG)
A_000123	noIPR	unintegrated	unintegrated	SSF47473 (SUPERFAMILY)
A_000123	noIPR	unintegrated	unintegrated
A_000124	IPR018247	EF-Hand 1, calcium-binding site	Binding_site	PS00018 (PROSITE)
A_000124	IPR018247	EF-Hand 1, calcium-binding site	Binding_site
A_000124	IPR018249	EF-HAND 2	Repeat	PS50222 (PROFILE)
A_000124	IPR018249	EF-HAND 2	Repeat
A_000124	IPR011992	EF-hand-like domain	Domain	G3DSA:1.10.238.10 (GENE3D)
A_000124	IPR011992	EF-hand-like domain	Domain	GO:0005509
A_000124	noIPR	unintegrated	unintegrated	seg (SEG)
A_000124	noIPR	unintegrated	unintegrated	SSF47473 (SUPERFAMILY)
A_000124	noIPR	unintegrated	unintegrated
A_000125	IPR002048	Calcium-binding EF-hand	Repeat	SM00054 (SMART)
A_000125	IPR002048	Calcium-binding EF-hand	Repeat	GO:0005509
A_000125	IPR018247	EF-Hand 1, calcium-binding site	Binding_site	PS00018 (PROSITE)
A_000125	IPR018247	EF-Hand 1, calcium-binding site	Binding_site
A_000125	IPR018249	EF-HAND 2	Repeat	PS50222 (PROFILE)
A_000125	IPR018249	EF-HAND 2	Repeat
A_000125	IPR011992	EF-hand-like domain	Domain	G3DSA:1.10.238.10 (GENE3D)
A_000125	IPR011992	EF-hand-like domain	Domain	GO:0005509
A_000125	noIPR	unintegrated	unintegrated	PTHR10827 (PANTHER)
A_000125	noIPR	unintegrated	unintegrated	seg (SEG)
A_000125	noIPR	unintegrated	unintegrated	SSF47473 (SUPERFAMILY)
A_000125	noIPR	unintegrated	unintegrated
A_000126	noIPR	unintegrated	unintegrated	seg (SEG)
A_000126	noIPR	unintegrated	unintegrated	tmhmm (TMHMM)
A_000126	noIPR	unintegrated	unintegrated
A_000127	IPR009044	ssDNA-binding transcriptional regulator	Domain	G3DSA:2.30.31.10 (GENE3D)
A_000127	IPR009044	ssDNA-binding transcriptional regulator	Domain	SSF54447 (SUPERFAMILY)
A_000127	IPR009044	ssDNA-binding transcriptional regulator	Domain	GO:0003677
A_000127	IPR009044	ssDNA-binding transcriptional regulator	Domain	GO:0005488
A_000127	IPR003173	Transcriptional coactivator p15	Domain	PF02229 (PFAM)
A_000127	IPR003173	Transcriptional coactivator p15	Domain	GO:0003677
A_000127	IPR003173	Transcriptional coactivator p15	Domain	GO:0003713
A_000127	noIPR	unintegrated	unintegrated	PTHR13215 (PANTHER)
A_000127	noIPR	unintegrated	unintegrated	seg (SEG)
A_000127	noIPR	unintegrated	unintegrated
A_000129	noIPR	unintegrated	unintegrated	seg (SEG)
A_000129	noIPR	unintegrated	unintegrated
A_000130	noIPR	unintegrated	unintegrated	seg (SEG)
A_000130	noIPR	unintegrated	unintegrated
A_000131	noIPR	unintegrated	unintegrated	seg (SEG)
A_000131	noIPR	unintegrated	unintegrated
A_000132	noIPR	unintegrated	unintegrated	seg (SEG)
A_000132	noIPR	unintegrated	unintegrated
A_000133	noIPR	unintegrated	unintegrated	seg (SEG)
A_000133	noIPR	unintegrated	unintegrated
A_000134	noIPR	unintegrated	unintegrated	seg (SEG)
A_000134	noIPR	unintegrated	unintegrated
A_000135	noIPR	unintegrated	unintegrated	seg (SEG)
A_000135	noIPR	unintegrated	unintegrated
A_000136	noIPR	unintegrated	unintegrated	seg (SEG)
A_000136	noIPR	unintegrated	unintegrated
A_000137	noIPR	unintegrated	unintegrated	seg (SEG)
A_000137	noIPR	unintegrated	unintegrated
A_000138	noIPR	unintegrated	unintegrated	seg (SEG)
A_000138	noIPR	unintegrated	unintegrated	tmhmm (TMHMM)
A_000138	noIPR	unintegrated	unintegrated
A_000139	noIPR	unintegrated	unintegrated	seg (SEG)
A_000139	noIPR	unintegrated	unintegrated
A_000140	noIPR	unintegrated	unintegrated	seg (SEG)
A_000140	noIPR	unintegrated	unintegrated
A_000141	noIPR	unintegrated	unintegrated	seg (SEG)
A_000141	noIPR	unintegrated	unintegrated	tmhmm (TMHMM)
A_000141	noIPR	unintegrated	unintegrated
A_000142	noIPR	unintegrated	unintegrated	seg (SEG)
A_000142	noIPR	unintegrated	unintegrated
A_000143	noIPR	unintegrated	unintegrated	seg (SEG)
A_000143	noIPR	unintegrated	unintegrated
A_000144	noIPR	unintegrated	unintegrated	seg (SEG)
A_000144	noIPR	unintegrated	unintegrated	tmhmm (TMHMM)
A_000144	noIPR	unintegrated	unintegrated
A_000145	noIPR	unintegrated	unintegrated	seg (SEG)
A_000145	noIPR	unintegrated	unintegrated	tmhmm (TMHMM)
A_000145	noIPR	unintegrated	unintegrated
A_000146	noIPR	unintegrated	unintegrated	coil (COIL)
A_000146	noIPR	unintegrated	unintegrated	seg (SEG)
A_000146	noIPR	unintegrated	unintegrated
A_000147	noIPR	unintegrated	unintegrated	coil (COIL)
A_000147	noIPR	unintegrated	unintegrated	seg (SEG)
A_000147	noIPR	unintegrated	unintegrated
A_000148	noIPR	unintegrated	unintegrated	coil (COIL)
A_000148	noIPR	unintegrated	unintegrated	seg (SEG)
A_000148	noIPR	unintegrated	unintegrated
A_000149	noIPR	unintegrated	unintegrated	seg (SEG)
A_000149	noIPR	unintegrated	unintegrated
A_000150	noIPR	unintegrated	unintegrated	coil (COIL)
A_000150	noIPR	unintegrated	unintegrated	seg (SEG)
A_000150	noIPR	unintegrated	unintegrated
A_000151	noIPR	unintegrated	unintegrated	coil (COIL)
A_000151	noIPR	unintegrated	unintegrated	seg (SEG)
A_000151	noIPR	unintegrated	unintegrated
A_000152	noIPR	unintegrated	unintegrated	coil (COIL)
A_000152	noIPR	unintegrated	unintegrated	seg (SEG)
A_000152	noIPR	unintegrated	unintegrated
A_000154	noIPR	unintegrated	unintegrated	coil (COIL)
A_000154	noIPR	unintegrated	unintegrated	seg (SEG)
A_000154	noIPR	unintegrated	unintegrated
A_000155	noIPR	unintegrated	unintegrated	seg (SEG)
A_000155	noIPR	unintegrated	unintegrated
A_000156	noIPR	unintegrated	unintegrated	seg (SEG)
A_000156	noIPR	unintegrated	unintegrated
A_000157	noIPR	unintegrated	unintegrated	coil (COIL)
A_000157	noIPR	unintegrated	unintegrated	seg (SEG)
A_000157	noIPR	unintegrated	unintegrated
A_000158	noIPR	unintegrated	unintegrated	coil (COIL)
A_000158	noIPR	unintegrated	unintegrated	seg (SEG)
A_000158	noIPR	unintegrated	unintegrated
A_000159	noIPR	unintegrated	unintegrated	coil (COIL)
A_000159	noIPR	unintegrated	unintegrated	seg (SEG)
A_000159	noIPR	unintegrated	unintegrated
A_000160	noIPR	unintegrated	unintegrated	seg (SEG)
A_000160	noIPR	unintegrated	unintegrated
A_000161	noIPR	unintegrated	unintegrated	coil (COIL)
A_000161	noIPR	unintegrated	unintegrated	seg (SEG)
A_000161	noIPR	unintegrated	unintegrated
A_000162	noIPR	unintegrated	unintegrated	coil (COIL)
A_000162	noIPR	unintegrated	unintegrated	seg (SEG)
A_000162	noIPR	unintegrated	unintegrated
A_000164	noIPR	unintegrated	unintegrated	coil (COIL)
A_000164	noIPR	unintegrated	unintegrated	seg (SEG)
A_000164	noIPR	unintegrated	unintegrated
A_000165	noIPR	unintegrated	unintegrated	coil (COIL)
A_000165	noIPR	unintegrated	unintegrated	seg (SEG)
A_000165	noIPR	unintegrated	unintegrated
A_000166	noIPR	unintegrated	unintegrated	coil (COIL)
A_000166	noIPR	unintegrated	unintegrated	seg (SEG)
A_000166	noIPR	unintegrated	unintegrated
A_000167	noIPR	unintegrated	unintegrated	coil (COIL)
A_000167	noIPR	unintegrated	unintegrated	seg (SEG)
A_000167	noIPR	unintegrated	unintegrated
A_000168	noIPR	unintegrated	unintegrated	seg (SEG)
A_000168	noIPR	unintegrated	unintegrated
A_000170	noIPR	unintegrated	unintegrated	seg (SEG)
A_000170	noIPR	unintegrated	unintegrated
A_000171	noIPR	unintegrated	unintegrated	seg (SEG)
A_000171	noIPR	unintegrated	unintegrated
A_000172	noIPR	unintegrated	unintegrated	seg (SEG)
A_000172	noIPR	unintegrated	unintegrated
A_000173	noIPR	unintegrated	unintegrated	seg (SEG)
A_000173	noIPR	unintegrated	unintegrated
A_000174	noIPR	unintegrated	unintegrated	seg (SEG)
A_000174	noIPR	unintegrated	unintegrated
A_000175	noIPR	unintegrated	unintegrated	seg (SEG)
A_000175	noIPR	unintegrated	unintegrated
A_000176	noIPR	unintegrated	unintegrated	seg (SEG)
A_000176	noIPR	unintegrated	unintegrated	SignalP-NN(euk) (SIGNALP)
A_000176	noIPR	unintegrated	unintegrated
A_000177	noIPR	unintegrated	unintegrated	seg (SEG)
A_000177	noIPR	unintegrated	unintegrated
A_000181	noIPR	unintegrated	unintegrated	seg (SEG)
A_000181	noIPR	unintegrated	unintegrated	SignalP-NN(euk) (SIGNALP)
A_000181	noIPR	unintegrated	unintegrated	tmhmm (TMHMM)
A_000181	noIPR	unintegrated	unintegrated
A_000182	noIPR	unintegrated	unintegrated	seg (SEG)
A_000182	noIPR	unintegrated	unintegrated
A_000183	noIPR	unintegrated	unintegrated	seg (SEG)
A_000183	noIPR	unintegrated	unintegrated
A_000184	noIPR	unintegrated	unintegrated	seg (SEG)
A_000184	noIPR	unintegrated	unintegrated
A_000185	noIPR	unintegrated	unintegrated	seg (SEG)
A_000185	noIPR	unintegrated	unintegrated	SignalP-NN(euk) (SIGNALP)
A_000185	noIPR	unintegrated	unintegrated	tmhmm (TMHMM)
A_000185	noIPR	unintegrated	unintegrated
A_000186	noIPR	unintegrated	unintegrated	seg (SEG)
A_000186	noIPR	unintegrated	unintegrated	SignalP-NN(euk) (SIGNALP)
A_000186	noIPR	unintegrated	unintegrated	tmhmm (TMHMM)
A_000186	noIPR	unintegrated	unintegrated
A_000187	IPR014010	Egg jelly receptor, REJ-like	Domain	PS51111 (PROFILE)
A_000187	IPR014010	Egg jelly receptor, REJ-like	Domain
A_000187	noIPR	unintegrated	unintegrated	seg (SEG)
A_000187	noIPR	unintegrated	unintegrated
A_000188	IPR014010	Egg jelly receptor, REJ-like	Domain	PS51111 (PROFILE)
A_000188	IPR014010	Egg jelly receptor, REJ-like	Domain
A_000188	noIPR	unintegrated	unintegrated	seg (SEG)
A_000188	noIPR	unintegrated	unintegrated
A_000189	IPR014010	Egg jelly receptor, REJ-like	Domain	PS51111 (PROFILE)
A_000189	IPR014010	Egg jelly receptor, REJ-like	Domain
A_000189	noIPR	unintegrated	unintegrated	seg (SEG)
A_000189	noIPR	unintegrated	unintegrated
A_000190	IPR014010	Egg jelly receptor, REJ-like	Domain	PS51111 (PROFILE)
A_000190	IPR014010	Egg jelly receptor, REJ-like	Domain
A_000190	noIPR	unintegrated	unintegrated	seg (SEG)
A_000190	noIPR	unintegrated	unintegrated
A_000191	noIPR	unintegrated	unintegrated	seg (SEG)
A_000191	noIPR	unintegrated	unintegrated
A_000192	noIPR	unintegrated	unintegrated	seg (SEG)
A_000192	noIPR	unintegrated	unintegrated
A_000193	noIPR	unintegrated	unintegrated	seg (SEG)
A_000193	noIPR	unintegrated	unintegrated
A_000194	noIPR	unintegrated	unintegrated	seg (SEG)
A_000194	noIPR	unintegrated	unintegrated
A_000195	noIPR	unintegrated	unintegrated	seg (SEG)
A_000195	noIPR	unintegrated	unintegrated
A_000196	noIPR	unintegrated	unintegrated	seg (SEG)
A_000196	noIPR	unintegrated	unintegrated
A_000197	noIPR	unintegrated	unintegrated	seg (SEG)
A_000197	noIPR	unintegrated	unintegrated
A_000198	noIPR	unintegrated	unintegrated	coil (COIL)
A_000198	noIPR	unintegrated	unintegrated	seg (SEG)
A_000198	noIPR	unintegrated	unintegrated
A_000199	noIPR	unintegrated	unintegrated	coil (COIL)
A_000199	noIPR	unintegrated	unintegrated	seg (SEG)
A_000199	noIPR	unintegrated	unintegrated
A_000200	noIPR	unintegrated	unintegrated	coil (COIL)
A_000200	noIPR	unintegrated	unintegrated	seg (SEG)
A_000200	noIPR	unintegrated	unintegrated
A_000203	noIPR	unintegrated	unintegrated	seg (SEG)
A_000203	noIPR	unintegrated	unintegrated	SignalP-NN(euk) (SIGNALP)
A_000203	noIPR	unintegrated	unintegrated
A_000204	noIPR	unintegrated	unintegrated	seg (SEG)
A_000204	noIPR	unintegrated	unintegrated	SignalP-NN(euk) (SIGNALP)
A_000204	noIPR	unintegrated	unintegrated
A_000205	IPR000215	Protease inhibitor I4, serpin	Family	PTHR11461 (PANTHER)
A_000205	IPR000215	Protease inhibitor I4, serpin	Family	GO:0004867
A_000205	IPR023796	Serpin domain	Domain	PF00079 (PFAM)
A_000205	IPR023796	Serpin domain	Domain	SM00093 (SMART)
A_000205	IPR023796	Serpin domain	Domain	SSF56574 (SUPERFAMILY)
A_000205	IPR023796	Serpin domain	Domain
A_000205	noIPR	unintegrated	unintegrated	G3DSA:2.30.39.10 (GENE3D)
A_000205	noIPR	unintegrated	unintegrated	G3DSA:3.30.497.10 (GENE3D)
A_000205	noIPR	unintegrated	unintegrated
A_000206	IPR000215	Protease inhibitor I4, serpin	Family	PTHR11461 (PANTHER)
A_000206	IPR000215	Protease inhibitor I4, serpin	Family	GO:0004867
A_000206	IPR023796	Serpin domain	Domain	PF00079 (PFAM)
A_000206	IPR023796	Serpin domain	Domain	SM00093 (SMART)
A_000206	IPR023796	Serpin domain	Domain	SSF56574 (SUPERFAMILY)
A_000206	IPR023796	Serpin domain	Domain
A_000206	noIPR	unintegrated	unintegrated	G3DSA:2.30.39.10 (GENE3D)
A_000206	noIPR	unintegrated	unintegrated	G3DSA:3.30.497.10 (GENE3D)
A_000206	noIPR	unintegrated	unintegrated
A_000207	IPR000215	Protease inhibitor I4, serpin	Family	PTHR11461 (PANTHER)
A_000207	IPR000215	Protease inhibitor I4, serpin	Family	GO:0004867
A_000207	IPR023796	Serpin domain	Domain	PF00079 (PFAM)
A_000207	IPR023796	Serpin domain	Domain	SM00093 (SMART)
A_000207	IPR023796	Serpin domain	Domain	SSF56574 (SUPERFAMILY)
A_000207	IPR023796	Serpin domain	Domain
A_000207	noIPR	unintegrated	unintegrated	G3DSA:2.30.39.10 (GENE3D)
A_000207	noIPR	unintegrated	unintegrated	G3DSA:3.30.497.10 (GENE3D)
A_000207	noIPR	unintegrated	unintegrated
A_000208	IPR000215	Protease inhibitor I4, serpin	Family	PTHR11461 (PANTHER)
A_000208	IPR000215	Protease inhibitor I4, serpin	Family	GO:0004867
A_000208	IPR023796	Serpin domain	Domain	PF00079 (PFAM)
A_000208	IPR023796	Serpin domain	Domain	SM00093 (SMART)
A_000208	IPR023796	Serpin domain	Domain	SSF56574 (SUPERFAMILY)
A_000208	IPR023796	Serpin domain	Domain
A_000208	noIPR	unintegrated	unintegrated	G3DSA:2.30.39.10 (GENE3D)
A_000208	noIPR	unintegrated	unintegrated	G3DSA:3.30.497.10 (GENE3D)
A_000208	noIPR	unintegrated	unintegrated
A_000209	IPR000215	Protease inhibitor I4, serpin	Family	PTHR11461 (PANTHER)
A_000209	IPR000215	Protease inhibitor I4, serpin	Family	GO:0004867
A_000209	IPR023796	Serpin domain	Domain	PF00079 (PFAM)
A_000209	IPR023796	Serpin domain	Domain	SM00093 (SMART)
A_000209	IPR023796	Serpin domain	Domain	SSF56574 (SUPERFAMILY)
A_000209	IPR023796	Serpin domain	Domain
A_000209	noIPR	unintegrated	unintegrated	G3DSA:2.30.39.10 (GENE3D)
A_000209	noIPR	unintegrated	unintegrated	G3DSA:3.30.497.10 (GENE3D)
A_000209	noIPR	unintegrated	unintegrated
A_000210	IPR000215	Protease inhibitor I4, serpin	Family	PTHR11461 (PANTHER)
A_000210	IPR000215	Protease inhibitor I4, serpin	Family	GO:0004867
A_000210	IPR023796	Serpin domain	Domain	PF00079 (PFAM)
A_000210	IPR023796	Serpin domain	Domain	SM00093 (SMART)
A_000210	IPR023796	Serpin domain	Domain	SSF56574 (SUPERFAMILY)
A_000210	IPR023796	Serpin domain	Domain
A_000210	noIPR	unintegrated	unintegrated	G3DSA:2.30.39.10 (GENE3D)
A_000210	noIPR	unintegrated	unintegrated	G3DSA:3.30.497.10 (GENE3D)
A_000210	noIPR	unintegrated	unintegrated
A_000211	IPR000215	Protease inhibitor I4, serpin	Family	PTHR11461 (PANTHER)
A_000211	IPR000215	Protease inhibitor I4, serpin	Family	GO:0004867
A_000211	IPR023796	Serpin domain	Domain	PF00079 (PFAM)
A_000211	IPR023796	Serpin domain	Domain	SM00093 (SMART)
A_000211	IPR023796	Serpin domain	Domain	SSF56574 (SUPERFAMILY)
A_000211	IPR023796	Serpin domain	Domain
A_000211	noIPR	unintegrated	unintegrated	G3DSA:2.30.39.10 (GENE3D)
A_000211	noIPR	unintegrated	unintegrated	G3DSA:3.30.497.10 (GENE3D)
A_000211	noIPR	unintegrated	unintegrated
A_000212	IPR000215	Protease inhibitor I4, serpin	Family	PTHR11461 (PANTHER)
A_000212	IPR000215	Protease inhibitor I4, serpin	Family	GO:0004867
A_000212	IPR023796	Serpin domain	Domain	PF00079 (PFAM)
A_000212	IPR023796	Serpin domain	Domain	SM00093 (SMART)
A_000212	IPR023796	Serpin domain	Domain	SSF56574 (SUPERFAMILY)
A_000212	IPR023796	Serpin domain	Domain
A_000212	noIPR	unintegrated	unintegrated	G3DSA:2.30.39.10 (GENE3D)
A_000212	noIPR	unintegrated	unintegrated	G3DSA:3.30.497.10 (GENE3D)
A_000212	noIPR	unintegrated	unintegrated
A_000213	IPR000215	Protease inhibitor I4, serpin	Family	PTHR11461 (PANTHER)
A_000213	IPR000215	Protease inhibitor I4, serpin	Family	GO:0004867
A_000213	IPR023796	Serpin domain	Domain	PF00079 (PFAM)
A_000213	IPR023796	Serpin domain	Domain	SSF56574 (SUPERFAMILY)
A_000213	IPR023796	Serpin domain	Domain
A_000213	noIPR	unintegrated	unintegrated	G3DSA:3.30.497.10 (GENE3D)
A_000213	noIPR	unintegrated	unintegrated	SignalP-NN(euk) (SIGNALP)
A_000213	noIPR	unintegrated	unintegrated
A_000214	IPR000215	Protease inhibitor I4, serpin	Family	PTHR11461 (PANTHER)
A_000214	IPR000215	Protease inhibitor I4, serpin	Family	GO:0004867
A_000214	IPR023795	Protease inhibitor I4, serpin, conserved site	Conserved_site	PS00284 (PROSITE)
A_000214	IPR023795	Protease inhibitor I4, serpin, conserved site	Conserved_site
A_000214	IPR023796	Serpin domain	Domain	PF00079 (PFAM)
A_000214	IPR023796	Serpin domain	Domain	SSF56574 (SUPERFAMILY)
A_000214	IPR023796	Serpin domain	Domain
A_000214	noIPR	unintegrated	unintegrated	G3DSA:2.30.39.10 (GENE3D)
A_000214	noIPR	unintegrated	unintegrated	G3DSA:3.30.497.10 (GENE3D)
A_000214	noIPR	unintegrated	unintegrated	seg (SEG)
A_000214	noIPR	unintegrated	unintegrated
A_000215	IPR000215	Protease inhibitor I4, serpin	Family	PTHR11461 (PANTHER)
A_000215	IPR000215	Protease inhibitor I4, serpin	Family	GO:0004867
A_000215	IPR023796	Serpin domain	Domain	PF00079 (PFAM)
A_000215	IPR023796	Serpin domain	Domain	SSF56574 (SUPERFAMILY)
A_000215	IPR023796	Serpin domain	Domain
A_000215	noIPR	unintegrated	unintegrated	G3DSA:3.30.497.10 (GENE3D)
A_000215	noIPR	unintegrated	unintegrated	SignalP-NN(euk) (SIGNALP)
A_000215	noIPR	unintegrated	unintegrated	tmhmm (TMHMM)
A_000215	noIPR	unintegrated	unintegrated
A_000216	IPR011497	Protease inhibitor, Kazal-type	Domain	PF07648 (PFAM)
A_000216	IPR011497	Protease inhibitor, Kazal-type	Domain
A_000216	IPR002350	Proteinase inhibitor I1, Kazal	Domain	PF00050 (PFAM)
A_000216	IPR002350	Proteinase inhibitor I1, Kazal	Domain	SM00280 (SMART)
A_000216	IPR002350	Proteinase inhibitor I1, Kazal	Domain	GO:0005515
A_000216	noIPR	unintegrated	unintegrated	G3DSA:3.30.60.30 (GENE3D)
A_000216	noIPR	unintegrated	unintegrated	PTHR10913 (PANTHER)
A_000216	noIPR	unintegrated	unintegrated	PTHR10913:SF6 (PANTHER)
A_000216	noIPR	unintegrated	unintegrated	PS51465 (PROFILE)
A_000216	noIPR	unintegrated	unintegrated	seg (SEG)
A_000216	noIPR	unintegrated	unintegrated	SignalP-NN(euk) (SIGNALP)
A_000216	noIPR	unintegrated	unintegrated	SSF100895 (SUPERFAMILY)
A_000216	noIPR	unintegrated	unintegrated
A_000217	IPR011497	Protease inhibitor, Kazal-type	Domain	PF07648 (PFAM)
A_000217	IPR011497	Protease inhibitor, Kazal-type	Domain
A_000217	IPR002350	Proteinase inhibitor I1, Kazal	Domain	PF00050 (PFAM)
A_000217	IPR002350	Proteinase inhibitor I1, Kazal	Domain	SM00280 (SMART)
A_000217	IPR002350	Proteinase inhibitor I1, Kazal	Domain	GO:0005515
A_000217	noIPR	unintegrated	unintegrated	G3DSA:3.30.60.30 (GENE3D)
A_000217	noIPR	unintegrated	unintegrated	PTHR10913 (PANTHER)
A_000217	noIPR	unintegrated	unintegrated	PTHR10913:SF6 (PANTHER)
A_000217	noIPR	unintegrated	unintegrated	PS51465 (PROFILE)
A_000217	noIPR	unintegrated	unintegrated	seg (SEG)
A_000217	noIPR	unintegrated	unintegrated	SignalP-NN(euk) (SIGNALP)
A_000217	noIPR	unintegrated	unintegrated	SSF100895 (SUPERFAMILY)
A_000217	noIPR	unintegrated	unintegrated
A_000218	IPR011497	Protease inhibitor, Kazal-type	Domain	PF07648 (PFAM)
A_000218	IPR011497	Protease inhibitor, Kazal-type	Domain
A_000218	IPR002350	Proteinase inhibitor I1, Kazal	Domain	PF00050 (PFAM)
A_000218	IPR002350	Proteinase inhibitor I1, Kazal	Domain	SM00280 (SMART)
A_000218	IPR002350	Proteinase inhibitor I1, Kazal	Domain	GO:0005515
A_000218	noIPR	unintegrated	unintegrated	G3DSA:3.30.60.30 (GENE3D)
A_000218	noIPR	unintegrated	unintegrated	PTHR10913 (PANTHER)
A_000218	noIPR	unintegrated	unintegrated	PTHR10913:SF6 (PANTHER)
A_000218	noIPR	unintegrated	unintegrated	PS51465 (PROFILE)
A_000218	noIPR	unintegrated	unintegrated	seg (SEG)
A_000218	noIPR	unintegrated	unintegrated	SignalP-NN(euk) (SIGNALP)
A_000218	noIPR	unintegrated	unintegrated	SSF100895 (SUPERFAMILY)
A_000218	noIPR	unintegrated	unintegrated
A_000219	IPR011497	Protease inhibitor, Kazal-type	Domain	PF07648 (PFAM)
A_000219	IPR011497	Protease inhibitor, Kazal-type	Domain
A_000219	IPR002350	Proteinase inhibitor I1, Kazal	Domain	PF00050 (PFAM)
A_000219	IPR002350	Proteinase inhibitor I1, Kazal	Domain	SM00280 (SMART)
A_000219	IPR002350	Proteinase inhibitor I1, Kazal	Domain	GO:0005515
A_000219	noIPR	unintegrated	unintegrated	G3DSA:3.30.60.30 (GENE3D)
A_000219	noIPR	unintegrated	unintegrated	PTHR10913 (PANTHER)
A_000219	noIPR	unintegrated	unintegrated	PTHR10913:SF6 (PANTHER)
A_000219	noIPR	unintegrated	unintegrated	PS51465 (PROFILE)
A_000219	noIPR	unintegrated	unintegrated	seg (SEG)
A_000219	noIPR	unintegrated	unintegrated	SignalP-NN(euk) (SIGNALP)
A_000219	noIPR	unintegrated	unintegrated	SSF100895 (SUPERFAMILY)
A_000219	noIPR	unintegrated	unintegrated
A_000220	IPR011497	Protease inhibitor, Kazal-type	Domain	PF07648 (PFAM)
A_000220	IPR011497	Protease inhibitor, Kazal-type	Domain
A_000220	IPR002350	Proteinase inhibitor I1, Kazal	Domain	PF00050 (PFAM)
A_000220	IPR002350	Proteinase inhibitor I1, Kazal	Domain	SM00280 (SMART)
A_000220	IPR002350	Proteinase inhibitor I1, Kazal	Domain	GO:0005515
A_000220	noIPR	unintegrated	unintegrated	G3DSA:3.30.60.30 (GENE3D)
A_000220	noIPR	unintegrated	unintegrated	PTHR10913 (PANTHER)
A_000220	noIPR	unintegrated	unintegrated	PTHR10913:SF6 (PANTHER)
A_000220	noIPR	unintegrated	unintegrated	PS51465 (PROFILE)
A_000220	noIPR	unintegrated	unintegrated	seg (SEG)
A_000220	noIPR	unintegrated	unintegrated	SignalP-NN(euk) (SIGNALP)
A_000220	noIPR	unintegrated	unintegrated	SSF100895 (SUPERFAMILY)
A_000220	noIPR	unintegrated	unintegrated
A_000221	IPR011497	Protease inhibitor, Kazal-type	Domain	PF07648 (PFAM)
A_000221	IPR011497	Protease inhibitor, Kazal-type	Domain
A_000221	IPR002350	Proteinase inhibitor I1, Kazal	Domain	PF00050 (PFAM)
A_000221	IPR002350	Proteinase inhibitor I1, Kazal	Domain	SM00280 (SMART)
A_000221	IPR002350	Proteinase inhibitor I1, Kazal	Domain	GO:0005515
A_000221	noIPR	unintegrated	unintegrated	G3DSA:3.30.60.30 (GENE3D)
A_000221	noIPR	unintegrated	unintegrated	PTHR10913 (PANTHER)
A_000221	noIPR	unintegrated	unintegrated	PTHR10913:SF6 (PANTHER)
A_000221	noIPR	unintegrated	unintegrated	PS51465 (PROFILE)
A_000221	noIPR	unintegrated	unintegrated	seg (SEG)
A_000221	noIPR	unintegrated	unintegrated	SignalP-NN(euk) (SIGNALP)
A_000221	noIPR	unintegrated	unintegrated	SSF100895 (SUPERFAMILY)
A_000221	noIPR	unintegrated	unintegrated
A_000222	IPR011497	Protease inhibitor, Kazal-type	Domain	PF07648 (PFAM)
A_000222	IPR011497	Protease inhibitor, Kazal-type	Domain
A_000222	IPR002350	Proteinase inhibitor I1, Kazal	Domain	PF00050 (PFAM)
A_000222	IPR002350	Proteinase inhibitor I1, Kazal	Domain	SM00280 (SMART)
A_000222	IPR002350	Proteinase inhibitor I1, Kazal	Domain	GO:0005515
A_000222	noIPR	unintegrated	unintegrated	G3DSA:3.30.60.30 (GENE3D)
A_000222	noIPR	unintegrated	unintegrated	PTHR10913 (PANTHER)
A_000222	noIPR	unintegrated	unintegrated	PTHR10913:SF6 (PANTHER)
A_000222	noIPR	unintegrated	unintegrated	PS51465 (PROFILE)
A_000222	noIPR	unintegrated	unintegrated	seg (SEG)
A_000222	noIPR	unintegrated	unintegrated	SignalP-NN(euk) (SIGNALP)
A_000222	noIPR	unintegrated	unintegrated	SSF100895 (SUPERFAMILY)
A_000222	noIPR	unintegrated	unintegrated
A_000223	IPR011497	Protease inhibitor, Kazal-type	Domain	PF07648 (PFAM)
A_000223	IPR011497	Protease inhibitor, Kazal-type	Domain
A_000223	IPR002350	Proteinase inhibitor I1, Kazal	Domain	PF00050 (PFAM)
A_000223	IPR002350	Proteinase inhibitor I1, Kazal	Domain	SM00280 (SMART)
A_000223	IPR002350	Proteinase inhibitor I1, Kazal	Domain	GO:0005515
A_000223	noIPR	unintegrated	unintegrated	G3DSA:3.30.60.30 (GENE3D)
A_000223	noIPR	unintegrated	unintegrated	PTHR10913 (PANTHER)
A_000223	noIPR	unintegrated	unintegrated	PTHR10913:SF6 (PANTHER)
A_000223	noIPR	unintegrated	unintegrated	PS51465 (PROFILE)
A_000223	noIPR	unintegrated	unintegrated	seg (SEG)
A_000223	noIPR	unintegrated	unintegrated	SignalP-NN(euk) (SIGNALP)
A_000223	noIPR	unintegrated	unintegrated	SSF100895 (SUPERFAMILY)
A_000223	noIPR	unintegrated	unintegrated
A_000224	IPR011497	Protease inhibitor, Kazal-type	Domain	PF07648 (PFAM)
A_000224	IPR011497	Protease inhibitor, Kazal-type	Domain
A_000224	IPR002350	Proteinase inhibitor I1, Kazal	Domain	PF00050 (PFAM)
A_000224	IPR002350	Proteinase inhibitor I1, Kazal	Domain	SM00280 (SMART)
A_000224	IPR002350	Proteinase inhibitor I1, Kazal	Domain	GO:0005515
A_000224	noIPR	unintegrated	unintegrated	G3DSA:3.30.60.30 (GENE3D)
A_000224	noIPR	unintegrated	unintegrated	PTHR10913 (PANTHER)
A_000224	noIPR	unintegrated	unintegrated	PTHR10913:SF6 (PANTHER)
A_000224	noIPR	unintegrated	unintegrated	PS51465 (PROFILE)
A_000224	noIPR	unintegrated	unintegrated	seg (SEG)
A_000224	noIPR	unintegrated	unintegrated	SSF100895 (SUPERFAMILY)
A_000224	noIPR	unintegrated	unintegrated
A_000225	IPR011497	Protease inhibitor, Kazal-type	Domain	PF07648 (PFAM)
A_000225	IPR011497	Protease inhibitor, Kazal-type	Domain
A_000225	IPR002350	Proteinase inhibitor I1, Kazal	Domain	PF00050 (PFAM)
A_000225	IPR002350	Proteinase inhibitor I1, Kazal	Domain	SM00280 (SMART)
A_000225	IPR002350	Proteinase inhibitor I1, Kazal	Domain	GO:0005515
A_000225	noIPR	unintegrated	unintegrated	G3DSA:3.30.60.30 (GENE3D)
A_000225	noIPR	unintegrated	unintegrated	PTHR10913 (PANTHER)
A_000225	noIPR	unintegrated	unintegrated	PTHR10913:SF6 (PANTHER)
A_000225	noIPR	unintegrated	unintegrated	PS51465 (PROFILE)
A_000225	noIPR	unintegrated	unintegrated	seg (SEG)
A_000225	noIPR	unintegrated	unintegrated	SSF100895 (SUPERFAMILY)
A_000225	noIPR	unintegrated	unintegrated
A_000226	noIPR	unintegrated	unintegrated	SignalP-NN(euk) (SIGNALP)
A_000226	noIPR	unintegrated	unintegrated	tmhmm (TMHMM)
A_000226	noIPR	unintegrated	unintegrated
A_000227	noIPR	unintegrated	unintegrated	SignalP-NN(euk) (SIGNALP)
A_000227	noIPR	unintegrated	unintegrated	tmhmm (TMHMM)
A_000227	noIPR	unintegrated	unintegrated
A_000233	IPR000626	Ubiquitin	Domain	PF00240 (PFAM)
A_000233	IPR000626	Ubiquitin	Domain	SM00213 (SMART)
A_000233	IPR000626	Ubiquitin	Domain	GO:0005515
A_000233	IPR019954	Ubiquitin conserved site	Conserved_site	PS00299 (PROSITE)
A_000233	IPR019954	Ubiquitin conserved site	Conserved_site
A_000233	IPR019956	Ubiquitin subgroup	Family	PR00348 (PRINTS)
A_000233	IPR019956	Ubiquitin subgroup	Family
A_000233	IPR019955	Ubiquitin supergroup	Domain	PS50053 (PROFILE)
A_000233	IPR019955	Ubiquitin supergroup	Domain
A_000233	noIPR	unintegrated	unintegrated	G3DSA:3.10.20.90 (GENE3D)
A_000233	noIPR	unintegrated	unintegrated	PTHR10666 (PANTHER)
A_000233	noIPR	unintegrated	unintegrated	SSF54236 (SUPERFAMILY)
A_000233	noIPR	unintegrated	unintegrated
A_000234	IPR000626	Ubiquitin	Domain	PF00240 (PFAM)
A_000234	IPR000626	Ubiquitin	Domain	SM00213 (SMART)
A_000234	IPR000626	Ubiquitin	Domain	GO:0005515
A_000234	IPR019954	Ubiquitin conserved site	Conserved_site	PS00299 (PROSITE)
A_000234	IPR019954	Ubiquitin conserved site	Conserved_site
A_000234	IPR019956	Ubiquitin subgroup	Family	PR00348 (PRINTS)
A_000234	IPR019956	Ubiquitin subgroup	Family
A_000234	IPR019955	Ubiquitin supergroup	Domain	PS50053 (PROFILE)
A_000234	IPR019955	Ubiquitin supergroup	Domain
A_000234	noIPR	unintegrated	unintegrated	G3DSA:3.10.20.90 (GENE3D)
A_000234	noIPR	unintegrated	unintegrated	PTHR10666 (PANTHER)
A_000234	noIPR	unintegrated	unintegrated	SSF54236 (SUPERFAMILY)
A_000234	noIPR	unintegrated	unintegrated
A_000235	noIPR	unintegrated	unintegrated	seg (SEG)
A_000235	noIPR	unintegrated	unintegrated	tmhmm (TMHMM)
A_000235	noIPR	unintegrated	unintegrated
A_000236	noIPR	unintegrated	unintegrated	seg (SEG)
A_000236	noIPR	unintegrated	unintegrated	tmhmm (TMHMM)
A_000236	noIPR	unintegrated	unintegrated
A_000237	noIPR	unintegrated	unintegrated	seg (SEG)
A_000237	noIPR	unintegrated	unintegrated	tmhmm (TMHMM)
A_000237	noIPR	unintegrated	unintegrated
A_000238	noIPR	unintegrated	unintegrated	seg (SEG)
A_000238	noIPR	unintegrated	unintegrated	tmhmm (TMHMM)
A_000238	noIPR	unintegrated	unintegrated
A_000239	noIPR	unintegrated	unintegrated	seg (SEG)
A_000239	noIPR	unintegrated	unintegrated
A_000240	noIPR	unintegrated	unintegrated	seg (SEG)
A_000240	noIPR	unintegrated	unintegrated
A_000241	noIPR	unintegrated	unintegrated	seg (SEG)
A_000241	noIPR	unintegrated	unintegrated	tmhmm (TMHMM)
A_000241	noIPR	unintegrated	unintegrated
A_000242	noIPR	unintegrated	unintegrated	seg (SEG)
A_000242	noIPR	unintegrated	unintegrated	tmhmm (TMHMM)
A_000242	noIPR	unintegrated	unintegrated
A_000243	noIPR	unintegrated	unintegrated	SignalP-NN(euk) (SIGNALP)
A_000243	noIPR	unintegrated	unintegrated
A_000244	noIPR	unintegrated	unintegrated	SignalP-NN(euk) (SIGNALP)
A_000244	noIPR	unintegrated	unintegrated	tmhmm (TMHMM)
A_000244	noIPR	unintegrated	unintegrated
A_000245	noIPR	unintegrated	unintegrated	seg (SEG)
A_000245	noIPR	unintegrated	unintegrated
A_000246	noIPR	unintegrated	unintegrated	SignalP-NN(euk) (SIGNALP)
A_000246	noIPR	unintegrated	unintegrated
A_000248	noIPR	unintegrated	unintegrated	SignalP-NN(euk) (SIGNALP)
A_000248	noIPR	unintegrated	unintegrated	tmhmm (TMHMM)
A_000248	noIPR	unintegrated	unintegrated
A_000250	noIPR	unintegrated	unintegrated	SignalP-NN(euk) (SIGNALP)
A_000250	noIPR	unintegrated	unintegrated
A_000251	noIPR	unintegrated	unintegrated	SignalP-NN(euk) (SIGNALP)
A_000251	noIPR	unintegrated	unintegrated
A_000256	noIPR	unintegrated	unintegrated	seg (SEG)
A_000256	noIPR	unintegrated	unintegrated	SignalP-NN(euk) (SIGNALP)
A_000256	noIPR	unintegrated	unintegrated	tmhmm (TMHMM)
A_000256	noIPR	unintegrated	unintegrated
A_000257	noIPR	unintegrated	unintegrated	seg (SEG)
A_000257	noIPR	unintegrated	unintegrated	SignalP-NN(euk) (SIGNALP)
A_000257	noIPR	unintegrated	unintegrated	tmhmm (TMHMM)
A_000257	noIPR	unintegrated	unintegrated
A_000259	noIPR	unintegrated	unintegrated	tmhmm (TMHMM)
A_000259	noIPR	unintegrated	unintegrated
A_000260	IPR001506	Peptidase M12A, astacin	Domain	PF01400 (PFAM)
A_000260	IPR001506	Peptidase M12A, astacin	Domain	GO:0004222
A_000260	IPR001506	Peptidase M12A, astacin	Domain	GO:0006508
A_000260	noIPR	unintegrated	unintegrated	G3DSA:3.40.390.10 (GENE3D)
A_000260	noIPR	unintegrated	unintegrated	PTHR10127 (PANTHER)
A_000260	noIPR	unintegrated	unintegrated	seg (SEG)
A_000260	noIPR	unintegrated	unintegrated
A_000261	noIPR	unintegrated	unintegrated	tmhmm (TMHMM)
A_000261	noIPR	unintegrated	unintegrated
A_000262	IPR001506	Peptidase M12A, astacin	Domain	PF01400 (PFAM)
A_000262	IPR001506	Peptidase M12A, astacin	Domain	GO:0004222
A_000262	IPR001506	Peptidase M12A, astacin	Domain	GO:0006508
A_000262	noIPR	unintegrated	unintegrated	G3DSA:3.40.390.10 (GENE3D)
A_000262	noIPR	unintegrated	unintegrated	PTHR10127 (PANTHER)
A_000262	noIPR	unintegrated	unintegrated	seg (SEG)
A_000262	noIPR	unintegrated	unintegrated
A_000263	noIPR	unintegrated	unintegrated	tmhmm (TMHMM)
A_000263	noIPR	unintegrated	unintegrated
A_000264	IPR001506	Peptidase M12A, astacin	Domain	PF01400 (PFAM)
A_000264	IPR001506	Peptidase M12A, astacin	Domain	GO:0004222
A_000264	IPR001506	Peptidase M12A, astacin	Domain	GO:0006508
A_000264	noIPR	unintegrated	unintegrated	G3DSA:3.40.390.10 (GENE3D)
A_000264	noIPR	unintegrated	unintegrated	PTHR10127 (PANTHER)
A_000264	noIPR	unintegrated	unintegrated	seg (SEG)
A_000264	noIPR	unintegrated	unintegrated
A_000265	noIPR	unintegrated	unintegrated	tmhmm (TMHMM)
A_000265	noIPR	unintegrated	unintegrated
A_000266	IPR001506	Peptidase M12A, astacin	Domain	PF01400 (PFAM)
A_000266	IPR001506	Peptidase M12A, astacin	Domain	GO:0004222
A_000266	IPR001506	Peptidase M12A, astacin	Domain	GO:0006508
A_000266	noIPR	unintegrated	unintegrated	G3DSA:3.40.390.10 (GENE3D)
A_000266	noIPR	unintegrated	unintegrated	PTHR10127 (PANTHER)
A_000266	noIPR	unintegrated	unintegrated	seg (SEG)
A_000266	noIPR	unintegrated	unintegrated
A_000268	noIPR	unintegrated	unintegrated	tmhmm (TMHMM)
A_000268	noIPR	unintegrated	unintegrated
A_000269	noIPR	unintegrated	unintegrated	SignalP-NN(euk) (SIGNALP)
A_000269	noIPR	unintegrated	unintegrated
A_000272	noIPR	unintegrated	unintegrated	SignalP-NN(euk) (SIGNALP)
A_000272	noIPR	unintegrated	unintegrated
A_000273	noIPR	unintegrated	unintegrated	seg (SEG)
A_000273	noIPR	unintegrated	unintegrated	SignalP-NN(euk) (SIGNALP)
A_000273	noIPR	unintegrated	unintegrated	tmhmm (TMHMM)
A_000273	noIPR	unintegrated	unintegrated
A_000280	noIPR	unintegrated	unintegrated	seg (SEG)
A_000280	noIPR	unintegrated	unintegrated	SignalP-NN(euk) (SIGNALP)
A_000280	noIPR	unintegrated	unintegrated
A_000281	noIPR	unintegrated	unintegrated	seg (SEG)
A_000281	noIPR	unintegrated	unintegrated
A_000283	noIPR	unintegrated	unintegrated	seg (SEG)
A_000283	noIPR	unintegrated	unintegrated	SignalP-NN(euk) (SIGNALP)
A_000283	noIPR	unintegrated	unintegrated	tmhmm (TMHMM)
A_000283	noIPR	unintegrated	unintegrated
A_000284	noIPR	unintegrated	unintegrated	seg (SEG)
A_000284	noIPR	unintegrated	unintegrated	tmhmm (TMHMM)
A_000284	noIPR	unintegrated	unintegrated
A_000285	noIPR	unintegrated	unintegrated	seg (SEG)
A_000285	noIPR	unintegrated	unintegrated	SignalP-NN(euk) (SIGNALP)
A_000285	noIPR	unintegrated	unintegrated	tmhmm (TMHMM)
A_000285	noIPR	unintegrated	unintegrated
A_000286	noIPR	unintegrated	unintegrated	seg (SEG)
A_000286	noIPR	unintegrated	unintegrated	SignalP-NN(euk) (SIGNALP)
A_000286	noIPR	unintegrated	unintegrated	tmhmm (TMHMM)
A_000286	noIPR	unintegrated	unintegrated
A_000287	noIPR	unintegrated	unintegrated	seg (SEG)
A_000287	noIPR	unintegrated	unintegrated	SignalP-NN(euk) (SIGNALP)
A_000287	noIPR	unintegrated	unintegrated	tmhmm (TMHMM)
A_000287	noIPR	unintegrated	unintegrated
A_000288	noIPR	unintegrated	unintegrated	seg (SEG)
A_000288	noIPR	unintegrated	unintegrated	SignalP-NN(euk) (SIGNALP)
A_000288	noIPR	unintegrated	unintegrated	tmhmm (TMHMM)
A_000288	noIPR	unintegrated	unintegrated
A_000289	noIPR	unintegrated	unintegrated	seg (SEG)
A_000289	noIPR	unintegrated	unintegrated	SignalP-NN(euk) (SIGNALP)
A_000289	noIPR	unintegrated	unintegrated	tmhmm (TMHMM)
A_000289	noIPR	unintegrated	unintegrated
A_000290	noIPR	unintegrated	unintegrated	tmhmm (TMHMM)
A_000290	noIPR	unintegrated	unintegrated
A_000291	noIPR	unintegrated	unintegrated	tmhmm (TMHMM)
A_000291	noIPR	unintegrated	unintegrated
A_000292	noIPR	unintegrated	unintegrated	seg (SEG)
A_000292	noIPR	unintegrated	unintegrated	SignalP-NN(euk) (SIGNALP)
A_000292	noIPR	unintegrated	unintegrated
A_000294	noIPR	unintegrated	unintegrated	PTHR11339 (PANTHER)
A_000294	noIPR	unintegrated	unintegrated	PTHR11339:SF43 (PANTHER)
A_000294	noIPR	unintegrated	unintegrated	seg (SEG)
A_000294	noIPR	unintegrated	unintegrated	SignalP-NN(euk) (SIGNALP)
A_000294	noIPR	unintegrated	unintegrated
A_000294	IPR001846	von Willebrand factor, type D domain	Domain	PF00094 (PFAM)
A_000294	IPR001846	von Willebrand factor, type D domain	Domain	SM00216 (SMART)
A_000294	IPR001846	von Willebrand factor, type D domain	Domain	PS51233 (PROFILE)
A_000294	IPR001846	von Willebrand factor, type D domain	Domain
A_000295	noIPR	unintegrated	unintegrated	PTHR11339 (PANTHER)
A_000295	noIPR	unintegrated	unintegrated	PTHR11339:SF43 (PANTHER)
A_000295	noIPR	unintegrated	unintegrated	seg (SEG)
A_000295	noIPR	unintegrated	unintegrated	SignalP-NN(euk) (SIGNALP)
A_000295	noIPR	unintegrated	unintegrated
A_000295	IPR001846	von Willebrand factor, type D domain	Domain	PF00094 (PFAM)
A_000295	IPR001846	von Willebrand factor, type D domain	Domain	SM00216 (SMART)
A_000295	IPR001846	von Willebrand factor, type D domain	Domain	PS51233 (PROFILE)
A_000295	IPR001846	von Willebrand factor, type D domain	Domain
A_000296	noIPR	unintegrated	unintegrated	PTHR11339 (PANTHER)
A_000296	noIPR	unintegrated	unintegrated	PTHR11339:SF43 (PANTHER)
A_000296	noIPR	unintegrated	unintegrated	seg (SEG)
A_000296	noIPR	unintegrated	unintegrated	SignalP-NN(euk) (SIGNALP)
A_000296	noIPR	unintegrated	unintegrated
A_000296	IPR001846	von Willebrand factor, type D domain	Domain	PF00094 (PFAM)
A_000296	IPR001846	von Willebrand factor, type D domain	Domain	SM00216 (SMART)
A_000296	IPR001846	von Willebrand factor, type D domain	Domain	PS51233 (PROFILE)
A_000296	IPR001846	von Willebrand factor, type D domain	Domain
A_000297	noIPR	unintegrated	unintegrated	PTHR11339 (PANTHER)
A_000297	noIPR	unintegrated	unintegrated	PTHR11339:SF43 (PANTHER)
A_000297	noIPR	unintegrated	unintegrated	seg (SEG)
A_000297	noIPR	unintegrated	unintegrated	SignalP-NN(euk) (SIGNALP)
A_000297	noIPR	unintegrated	unintegrated
A_000297	IPR001846	von Willebrand factor, type D domain	Domain	PF00094 (PFAM)
A_000297	IPR001846	von Willebrand factor, type D domain	Domain	SM00216 (SMART)
A_000297	IPR001846	von Willebrand factor, type D domain	Domain	PS51233 (PROFILE)
A_000297	IPR001846	von Willebrand factor, type D domain	Domain
A_000298	noIPR	unintegrated	unintegrated	PTHR11339 (PANTHER)
A_000298	noIPR	unintegrated	unintegrated	PTHR11339:SF43 (PANTHER)
A_000298	noIPR	unintegrated	unintegrated	seg (SEG)
A_000298	noIPR	unintegrated	unintegrated	SignalP-NN(euk) (SIGNALP)
A_000298	noIPR	unintegrated	unintegrated
A_000298	IPR001846	von Willebrand factor, type D domain	Domain	PF00094 (PFAM)
A_000298	IPR001846	von Willebrand factor, type D domain	Domain	SM00216 (SMART)
A_000298	IPR001846	von Willebrand factor, type D domain	Domain	PS51233 (PROFILE)
A_000298	IPR001846	von Willebrand factor, type D domain	Domain
A_000299	noIPR	unintegrated	unintegrated	seg (SEG)
A_000299	noIPR	unintegrated	unintegrated	SignalP-NN(euk) (SIGNALP)
A_000299	noIPR	unintegrated	unintegrated
A_000300	noIPR	unintegrated	unintegrated	seg (SEG)
A_000300	noIPR	unintegrated	unintegrated	SignalP-NN(euk) (SIGNALP)
A_000300	noIPR	unintegrated	unintegrated
A_000301	noIPR	unintegrated	unintegrated	seg (SEG)
A_000301	noIPR	unintegrated	unintegrated	SignalP-NN(euk) (SIGNALP)
A_000301	noIPR	unintegrated	unintegrated
A_000302	noIPR	unintegrated	unintegrated	seg (SEG)
A_000302	noIPR	unintegrated	unintegrated	SignalP-NN(euk) (SIGNALP)
A_000302	noIPR	unintegrated	unintegrated
A_000304	noIPR	unintegrated	unintegrated	SignalP-NN(euk) (SIGNALP)
A_000304	noIPR	unintegrated	unintegrated
A_000306	noIPR	unintegrated	unintegrated	seg (SEG)
A_000306	noIPR	unintegrated	unintegrated	SignalP-NN(euk) (SIGNALP)
A_000306	noIPR	unintegrated	unintegrated	tmhmm (TMHMM)
A_000306	noIPR	unintegrated	unintegrated
A_000307	noIPR	unintegrated	unintegrated	seg (SEG)
A_000307	noIPR	unintegrated	unintegrated	SignalP-NN(euk) (SIGNALP)
A_000307	noIPR	unintegrated	unintegrated	tmhmm (TMHMM)
A_000307	noIPR	unintegrated	unintegrated
A_000309	noIPR	unintegrated	unintegrated	SignalP-NN(euk) (SIGNALP)
A_000309	noIPR	unintegrated	unintegrated
A_000310	noIPR	unintegrated	unintegrated	seg (SEG)
A_000310	noIPR	unintegrated	unintegrated	SignalP-NN(euk) (SIGNALP)
A_000310	noIPR	unintegrated	unintegrated	tmhmm (TMHMM)
A_000310	noIPR	unintegrated	unintegrated
A_000311	noIPR	unintegrated	unintegrated	seg (SEG)
A_000311	noIPR	unintegrated	unintegrated	SignalP-NN(euk) (SIGNALP)
A_000311	noIPR	unintegrated	unintegrated	tmhmm (TMHMM)
A_000311	noIPR	unintegrated	unintegrated
A_000312	noIPR	unintegrated	unintegrated	seg (SEG)
A_000312	noIPR	unintegrated	unintegrated	SignalP-NN(euk) (SIGNALP)
A_000312	noIPR	unintegrated	unintegrated	tmhmm (TMHMM)
A_000312	noIPR	unintegrated	unintegrated
A_000313	noIPR	unintegrated	unintegrated	seg (SEG)
A_000313	noIPR	unintegrated	unintegrated	SignalP-NN(euk) (SIGNALP)
A_000313	noIPR	unintegrated	unintegrated
A_000314	noIPR	unintegrated	unintegrated	tmhmm (TMHMM)
A_000314	noIPR	unintegrated	unintegrated
A_000315	noIPR	unintegrated	unintegrated	SignalP-NN(euk) (SIGNALP)
A_000315	noIPR	unintegrated	unintegrated
A_000316	noIPR	unintegrated	unintegrated	seg (SEG)
A_000316	noIPR	unintegrated	unintegrated	SignalP-NN(euk) (SIGNALP)
A_000316	noIPR	unintegrated	unintegrated	tmhmm (TMHMM)
A_000316	noIPR	unintegrated	unintegrated
A_000317	noIPR	unintegrated	unintegrated	seg (SEG)
A_000317	noIPR	unintegrated	unintegrated	SignalP-NN(euk) (SIGNALP)
A_000317	noIPR	unintegrated	unintegrated
A_000318	noIPR	unintegrated	unintegrated	SignalP-NN(euk) (SIGNALP)
A_000318	noIPR	unintegrated	unintegrated
A_000326	IPR005024	Snf7	Family	PF03357 (PFAM)
A_000326	IPR005024	Snf7	Family	GO:0015031
A_000326	noIPR	unintegrated	unintegrated	coil (COIL)
A_000326	noIPR	unintegrated	unintegrated	PTHR22761 (PANTHER)
A_000326	noIPR	unintegrated	unintegrated
A_000327	IPR005024	Snf7	Family	PF03357 (PFAM)
A_000327	IPR005024	Snf7	Family	GO:0015031
A_000327	noIPR	unintegrated	unintegrated	coil (COIL)
A_000327	noIPR	unintegrated	unintegrated	PTHR22761 (PANTHER)
A_000327	noIPR	unintegrated	unintegrated
A_000328	IPR005024	Snf7	Family	PF03357 (PFAM)
A_000328	IPR005024	Snf7	Family	GO:0015031
A_000328	noIPR	unintegrated	unintegrated	coil (COIL)
A_000328	noIPR	unintegrated	unintegrated	PTHR22761 (PANTHER)
A_000328	noIPR	unintegrated	unintegrated
A_000329	IPR005024	Snf7	Family	PF03357 (PFAM)
A_000329	IPR005024	Snf7	Family	GO:0015031
A_000329	noIPR	unintegrated	unintegrated	coil (COIL)
A_000329	noIPR	unintegrated	unintegrated	PTHR22761 (PANTHER)
A_000329	noIPR	unintegrated	unintegrated
A_000330	IPR005141	eRF1 domain 2	Domain	PF03464 (PFAM)
A_000330	IPR005141	eRF1 domain 2	Domain
A_000330	IPR005142	eRF1 domain 3	Domain	PF03465 (PFAM)
A_000330	IPR005142	eRF1 domain 3	Domain
A_000330	IPR004403	Peptide chain release factor eRF1/aRF1	Family	PTHR10113 (PANTHER)
A_000330	IPR004403	Peptide chain release factor eRF1/aRF1	Family	GO:0005737
A_000330	IPR004403	Peptide chain release factor eRF1/aRF1	Family	GO:0006415
A_000330	noIPR	unintegrated	unintegrated	G3DSA:3.30.1330.30 (GENE3D)
A_000330	noIPR	unintegrated	unintegrated	G3DSA:3.30.420.60 (GENE3D)
A_000330	noIPR	unintegrated	unintegrated	SSF53137 (SUPERFAMILY)
A_000330	noIPR	unintegrated	unintegrated	SSF55315 (SUPERFAMILY)
A_000330	noIPR	unintegrated	unintegrated
A_000331	IPR005024	Snf7	Family	PF03357 (PFAM)
A_000331	IPR005024	Snf7	Family	GO:0015031
A_000331	noIPR	unintegrated	unintegrated	coil (COIL)
A_000331	noIPR	unintegrated	unintegrated	PTHR22761 (PANTHER)
A_000331	noIPR	unintegrated	unintegrated
A_000332	IPR005024	Snf7	Family	PF03357 (PFAM)
A_000332	IPR005024	Snf7	Family	GO:0015031
A_000332	noIPR	unintegrated	unintegrated	coil (COIL)
A_000332	noIPR	unintegrated	unintegrated	PTHR22761 (PANTHER)
A_000332	noIPR	unintegrated	unintegrated
A_000333	noIPR	unintegrated	unintegrated	seg (SEG)
A_000333	noIPR	unintegrated	unintegrated	tmhmm (TMHMM)
A_000333	noIPR	unintegrated	unintegrated
A_000334	noIPR	unintegrated	unintegrated	seg (SEG)
A_000334	noIPR	unintegrated	unintegrated	tmhmm (TMHMM)
A_000334	noIPR	unintegrated	unintegrated
A_000335	noIPR	unintegrated	unintegrated	seg (SEG)
A_000335	noIPR	unintegrated	unintegrated	tmhmm (TMHMM)
A_000335	noIPR	unintegrated	unintegrated
A_000336	noIPR	unintegrated	unintegrated	seg (SEG)
A_000336	noIPR	unintegrated	unintegrated	tmhmm (TMHMM)
A_000336	noIPR	unintegrated	unintegrated
A_000337	noIPR	unintegrated	unintegrated	seg (SEG)
A_000337	noIPR	unintegrated	unintegrated	tmhmm (TMHMM)
A_000337	noIPR	unintegrated	unintegrated
A_000338	noIPR	unintegrated	unintegrated	seg (SEG)
A_000338	noIPR	unintegrated	unintegrated	tmhmm (TMHMM)
A_000338	noIPR	unintegrated	unintegrated
A_000340	noIPR	unintegrated	unintegrated	SignalP-NN(euk) (SIGNALP)
A_000340	noIPR	unintegrated	unintegrated	tmhmm (TMHMM)
A_000340	noIPR	unintegrated	unintegrated
A_000341	noIPR	unintegrated	unintegrated	SignalP-NN(euk) (SIGNALP)
A_000341	noIPR	unintegrated	unintegrated	tmhmm (TMHMM)
A_000341	noIPR	unintegrated	unintegrated
A_000343	noIPR	unintegrated	unintegrated	SignalP-NN(euk) (SIGNALP)
A_000343	noIPR	unintegrated	unintegrated	tmhmm (TMHMM)
A_000343	noIPR	unintegrated	unintegrated
A_000344	noIPR	unintegrated	unintegrated	SignalP-NN(euk) (SIGNALP)
A_000344	noIPR	unintegrated	unintegrated	tmhmm (TMHMM)
A_000344	noIPR	unintegrated	unintegrated
A_000348	noIPR	unintegrated	unintegrated	seg (SEG)
A_000348	noIPR	unintegrated	unintegrated
A_000350	noIPR	unintegrated	unintegrated	seg (SEG)
A_000350	noIPR	unintegrated	unintegrated
A_000351	noIPR	unintegrated	unintegrated	seg (SEG)
A_000351	noIPR	unintegrated	unintegrated
A_000352	noIPR	unintegrated	unintegrated	seg (SEG)
A_000352	noIPR	unintegrated	unintegrated
A_000353	noIPR	unintegrated	unintegrated	seg (SEG)
A_000353	noIPR	unintegrated	unintegrated
A_000354	noIPR	unintegrated	unintegrated	seg (SEG)
A_000354	noIPR	unintegrated	unintegrated
A_000355	noIPR	unintegrated	unintegrated	seg (SEG)
A_000355	noIPR	unintegrated	unintegrated
A_000356	noIPR	unintegrated	unintegrated	coil (COIL)
A_000356	noIPR	unintegrated	unintegrated	seg (SEG)
A_000356	noIPR	unintegrated	unintegrated
A_000357	noIPR	unintegrated	unintegrated	coil (COIL)
A_000357	noIPR	unintegrated	unintegrated	seg (SEG)
A_000357	noIPR	unintegrated	unintegrated
A_000358	noIPR	unintegrated	unintegrated	coil (COIL)
A_000358	noIPR	unintegrated	unintegrated	seg (SEG)
A_000358	noIPR	unintegrated	unintegrated
A_000359	noIPR	unintegrated	unintegrated	coil (COIL)
A_000359	noIPR	unintegrated	unintegrated	seg (SEG)
A_000359	noIPR	unintegrated	unintegrated
A_000360	IPR008438	Calcineurin-binding	Family	PF05556 (PFAM)
A_000360	IPR008438	Calcineurin-binding	Family
A_000360	noIPR	unintegrated	unintegrated	PTHR24217 (PANTHER)
A_000360	noIPR	unintegrated	unintegrated	PTHR24217:SF3 (PANTHER)
A_000360	noIPR	unintegrated	unintegrated	seg (SEG)
A_000360	noIPR	unintegrated	unintegrated
A_000361	IPR008438	Calcineurin-binding	Family	PF05556 (PFAM)
A_000361	IPR008438	Calcineurin-binding	Family
A_000361	noIPR	unintegrated	unintegrated	PTHR24217 (PANTHER)
A_000361	noIPR	unintegrated	unintegrated	PTHR24217:SF3 (PANTHER)
A_000361	noIPR	unintegrated	unintegrated	seg (SEG)
A_000361	noIPR	unintegrated	unintegrated
A_000362	IPR008438	Calcineurin-binding	Family	PF05556 (PFAM)
A_000362	IPR008438	Calcineurin-binding	Family
A_000362	noIPR	unintegrated	unintegrated	PTHR24217 (PANTHER)
A_000362	noIPR	unintegrated	unintegrated	PTHR24217:SF3 (PANTHER)
A_000362	noIPR	unintegrated	unintegrated	seg (SEG)
A_000362	noIPR	unintegrated	unintegrated
A_000363	IPR008438	Calcineurin-binding	Family	PF05556 (PFAM)
A_000363	IPR008438	Calcineurin-binding	Family
A_000363	noIPR	unintegrated	unintegrated	PTHR24217 (PANTHER)
A_000363	noIPR	unintegrated	unintegrated	PTHR24217:SF3 (PANTHER)
A_000363	noIPR	unintegrated	unintegrated	seg (SEG)
A_000363	noIPR	unintegrated	unintegrated
A_000364	noIPR	unintegrated	unintegrated	seg (SEG)
A_000364	noIPR	unintegrated	unintegrated
A_000365	noIPR	unintegrated	unintegrated	seg (SEG)
A_000365	noIPR	unintegrated	unintegrated
A_000366	IPR008438	Calcineurin-binding	Family	PF05556 (PFAM)
A_000366	IPR008438	Calcineurin-binding	Family
A_000366	noIPR	unintegrated	unintegrated	PTHR24217 (PANTHER)
A_000366	noIPR	unintegrated	unintegrated	PTHR24217:SF3 (PANTHER)
A_000366	noIPR	unintegrated	unintegrated	seg (SEG)
A_000366	noIPR	unintegrated	unintegrated
A_000367	IPR008438	Calcineurin-binding	Family	PF05556 (PFAM)
A_000367	IPR008438	Calcineurin-binding	Family
A_000367	noIPR	unintegrated	unintegrated	PTHR24217 (PANTHER)
A_000367	noIPR	unintegrated	unintegrated	PTHR24217:SF3 (PANTHER)
A_000367	noIPR	unintegrated	unintegrated	seg (SEG)
A_000367	noIPR	unintegrated	unintegrated
A_000368	noIPR	unintegrated	unintegrated	seg (SEG)
A_000368	noIPR	unintegrated	unintegrated
A_000369	noIPR	unintegrated	unintegrated	seg (SEG)
A_000369	noIPR	unintegrated	unintegrated	tmhmm (TMHMM)
A_000369	noIPR	unintegrated	unintegrated
A_000370	noIPR	unintegrated	unintegrated	seg (SEG)
A_000370	noIPR	unintegrated	unintegrated	tmhmm (TMHMM)
A_000370	noIPR	unintegrated	unintegrated
A_000371	noIPR	unintegrated	unintegrated	seg (SEG)
A_000371	noIPR	unintegrated	unintegrated	tmhmm (TMHMM)
A_000371	noIPR	unintegrated	unintegrated
A_000372	noIPR	unintegrated	unintegrated	seg (SEG)
A_000372	noIPR	unintegrated	unintegrated	tmhmm (TMHMM)
A_000372	noIPR	unintegrated	unintegrated
A_000373	noIPR	unintegrated	unintegrated	seg (SEG)
A_000373	noIPR	unintegrated	unintegrated	tmhmm (TMHMM)
A_000373	noIPR	unintegrated	unintegrated
A_000374	noIPR	unintegrated	unintegrated	seg (SEG)
A_000374	noIPR	unintegrated	unintegrated	tmhmm (TMHMM)
A_000374	noIPR	unintegrated	unintegrated
A_000375	noIPR	unintegrated	unintegrated	seg (SEG)
A_000375	noIPR	unintegrated	unintegrated	tmhmm (TMHMM)
A_000375	noIPR	unintegrated	unintegrated
A_000376	noIPR	unintegrated	unintegrated	seg (SEG)
A_000376	noIPR	unintegrated	unintegrated	tmhmm (TMHMM)
A_000376	noIPR	unintegrated	unintegrated
A_000384	noIPR	unintegrated	unintegrated	seg (SEG)
A_000384	noIPR	unintegrated	unintegrated
A_000385	noIPR	unintegrated	unintegrated	seg (SEG)
A_000385	noIPR	unintegrated	unintegrated
A_000386	noIPR	unintegrated	unintegrated	seg (SEG)
A_000386	noIPR	unintegrated	unintegrated
A_000387	noIPR	unintegrated	unintegrated	seg (SEG)
A_000387	noIPR	unintegrated	unintegrated
A_000388	noIPR	unintegrated	unintegrated	seg (SEG)
A_000388	noIPR	unintegrated	unintegrated
A_000389	noIPR	unintegrated	unintegrated	seg (SEG)
A_000389	noIPR	unintegrated	unintegrated
A_000390	IPR001646	Pentapeptide repeat	Repeat	PF00805 (PFAM)
A_000390	IPR001646	Pentapeptide repeat	Repeat
A_000391	IPR001646	Pentapeptide repeat	Repeat	PF00805 (PFAM)
A_000391	IPR001646	Pentapeptide repeat	Repeat
A_000395	noIPR	unintegrated	unintegrated	seg (SEG)
A_000395	noIPR	unintegrated	unintegrated	SignalP-NN(euk) (SIGNALP)
A_000395	noIPR	unintegrated	unintegrated	tmhmm (TMHMM)
A_000395	noIPR	unintegrated	unintegrated
A_000396	noIPR	unintegrated	unintegrated	seg (SEG)
A_000396	noIPR	unintegrated	unintegrated	SignalP-NN(euk) (SIGNALP)
A_000396	noIPR	unintegrated	unintegrated	tmhmm (TMHMM)
A_000396	noIPR	unintegrated	unintegrated
A_000397	noIPR	unintegrated	unintegrated	seg (SEG)
A_000397	noIPR	unintegrated	unintegrated	SignalP-NN(euk) (SIGNALP)
A_000397	noIPR	unintegrated	unintegrated	tmhmm (TMHMM)
A_000397	noIPR	unintegrated	unintegrated
A_000398	noIPR	unintegrated	unintegrated	seg (SEG)
A_000398	noIPR	unintegrated	unintegrated	SignalP-NN(euk) (SIGNALP)
A_000398	noIPR	unintegrated	unintegrated	tmhmm (TMHMM)
A_000398	noIPR	unintegrated	unintegrated
A_000400	noIPR	unintegrated	unintegrated	seg (SEG)
A_000400	noIPR	unintegrated	unintegrated
A_000401	noIPR	unintegrated	unintegrated	seg (SEG)
A_000401	noIPR	unintegrated	unintegrated
A_000402	noIPR	unintegrated	unintegrated	seg (SEG)
A_000402	noIPR	unintegrated	unintegrated
A_000403	noIPR	unintegrated	unintegrated	SignalP-NN(euk) (SIGNALP)
A_000403	noIPR	unintegrated	unintegrated	tmhmm (TMHMM)
A_000403	noIPR	unintegrated	unintegrated
A_000404	noIPR	unintegrated	unintegrated	SignalP-NN(euk) (SIGNALP)
A_000404	noIPR	unintegrated	unintegrated	tmhmm (TMHMM)
A_000404	noIPR	unintegrated	unintegrated
A_000405	noIPR	unintegrated	unintegrated	SignalP-NN(euk) (SIGNALP)
A_000405	noIPR	unintegrated	unintegrated	tmhmm (TMHMM)
A_000405	noIPR	unintegrated	unintegrated
A_000406	noIPR	unintegrated	unintegrated	SignalP-NN(euk) (SIGNALP)
A_000406	noIPR	unintegrated	unintegrated	tmhmm (TMHMM)
A_000406	noIPR	unintegrated	unintegrated
A_000407	IPR004001	Actin, conserved site	Conserved_site	PS00406 (PROSITE)
A_000407	IPR004001	Actin, conserved site	Conserved_site	GO:0005524
A_000407	IPR020902	Actin/actin-like conserved site	Conserved_site	PS01132 (PROSITE)
A_000407	IPR020902	Actin/actin-like conserved site	Conserved_site
A_000407	IPR004000	Actin-like	Family	PR00190 (PRINTS)
A_000407	IPR004000	Actin-like	Family	PTHR11937 (PANTHER)
A_000407	IPR004000	Actin-like	Family	PF00022 (PFAM)
A_000407	IPR004000	Actin-like	Family	SM00268 (SMART)
A_000407	IPR004000	Actin-like	Family
A_000407	noIPR	unintegrated	unintegrated	G3DSA:2.30.36.70 (GENE3D)
A_000407	noIPR	unintegrated	unintegrated	G3DSA:3.30.420.40 (GENE3D)
A_000407	noIPR	unintegrated	unintegrated	G3DSA:3.90.640.10 (GENE3D)
A_000407	noIPR	unintegrated	unintegrated	PTHR11937:SF77 (PANTHER)
A_000407	noIPR	unintegrated	unintegrated	SSF53067 (SUPERFAMILY)
A_000407	noIPR	unintegrated	unintegrated
A_000408	IPR004001	Actin, conserved site	Conserved_site	PS00406 (PROSITE)
A_000408	IPR004001	Actin, conserved site	Conserved_site	GO:0005524
A_000408	IPR020902	Actin/actin-like conserved site	Conserved_site	PS01132 (PROSITE)
A_000408	IPR020902	Actin/actin-like conserved site	Conserved_site
A_000408	IPR004000	Actin-like	Family	PR00190 (PRINTS)
A_000408	IPR004000	Actin-like	Family	PTHR11937 (PANTHER)
A_000408	IPR004000	Actin-like	Family	PF00022 (PFAM)
A_000408	IPR004000	Actin-like	Family	SM00268 (SMART)
A_000408	IPR004000	Actin-like	Family
A_000408	noIPR	unintegrated	unintegrated	G3DSA:2.30.36.70 (GENE3D)
A_000408	noIPR	unintegrated	unintegrated	G3DSA:3.30.420.40 (GENE3D)
A_000408	noIPR	unintegrated	unintegrated	G3DSA:3.90.640.10 (GENE3D)
A_000408	noIPR	unintegrated	unintegrated	PTHR11937:SF77 (PANTHER)
A_000408	noIPR	unintegrated	unintegrated	SSF53067 (SUPERFAMILY)
A_000408	noIPR	unintegrated	unintegrated
A_000409	IPR004000	Actin-like	Family	PTHR11937 (PANTHER)
A_000409	IPR004000	Actin-like	Family	PF00022 (PFAM)
A_000409	IPR004000	Actin-like	Family	SM00268 (SMART)
A_000409	IPR004000	Actin-like	Family
A_000409	noIPR	unintegrated	unintegrated	G3DSA:3.30.420.40 (GENE3D)
A_000409	noIPR	unintegrated	unintegrated	G3DSA:3.90.640.10 (GENE3D)
A_000409	noIPR	unintegrated	unintegrated	tmhmm (TMHMM)
A_000409	noIPR	unintegrated	unintegrated	SSF53067 (SUPERFAMILY)
A_000409	noIPR	unintegrated	unintegrated
A_000410	IPR003124	Actin-binding WH2	Domain	PF02205 (PFAM)
A_000410	IPR003124	Actin-binding WH2	Domain	SM00246 (SMART)
A_000410	IPR003124	Actin-binding WH2	Domain	PS51082 (PROFILE)
A_000410	IPR003124	Actin-binding WH2	Domain	GO:0005515
A_000410	noIPR	unintegrated	unintegrated	coil (COIL)
A_000410	noIPR	unintegrated	unintegrated	PTHR12618 (PANTHER)
A_000410	noIPR	unintegrated	unintegrated	PTHR12618:SF8 (PANTHER)
A_000410	noIPR	unintegrated	unintegrated	seg (SEG)
A_000410	noIPR	unintegrated	unintegrated
A_000411	IPR003124	Actin-binding WH2	Domain	PF02205 (PFAM)
A_000411	IPR003124	Actin-binding WH2	Domain	SM00246 (SMART)
A_000411	IPR003124	Actin-binding WH2	Domain	PS51082 (PROFILE)
A_000411	IPR003124	Actin-binding WH2	Domain	GO:0005515
A_000411	noIPR	unintegrated	unintegrated	coil (COIL)
A_000411	noIPR	unintegrated	unintegrated	PTHR12618 (PANTHER)
A_000411	noIPR	unintegrated	unintegrated	PTHR12618:SF8 (PANTHER)
A_000411	noIPR	unintegrated	unintegrated	seg (SEG)
A_000411	noIPR	unintegrated	unintegrated
A_000412	IPR003124	Actin-binding WH2	Domain	PF02205 (PFAM)
A_000412	IPR003124	Actin-binding WH2	Domain	SM00246 (SMART)
A_000412	IPR003124	Actin-binding WH2	Domain	PS51082 (PROFILE)
A_000412	IPR003124	Actin-binding WH2	Domain	GO:0005515
A_000412	noIPR	unintegrated	unintegrated	coil (COIL)
A_000412	noIPR	unintegrated	unintegrated	PTHR12618 (PANTHER)
A_000412	noIPR	unintegrated	unintegrated	PTHR12618:SF8 (PANTHER)
A_000412	noIPR	unintegrated	unintegrated	seg (SEG)
A_000412	noIPR	unintegrated	unintegrated
A_000413	IPR003124	Actin-binding WH2	Domain	PF02205 (PFAM)
A_000413	IPR003124	Actin-binding WH2	Domain	SM00246 (SMART)
A_000413	IPR003124	Actin-binding WH2	Domain	PS51082 (PROFILE)
A_000413	IPR003124	Actin-binding WH2	Domain	GO:0005515
A_000413	noIPR	unintegrated	unintegrated	coil (COIL)
A_000413	noIPR	unintegrated	unintegrated	PTHR12618 (PANTHER)
A_000413	noIPR	unintegrated	unintegrated	PTHR12618:SF8 (PANTHER)
A_000413	noIPR	unintegrated	unintegrated	seg (SEG)
A_000413	noIPR	unintegrated	unintegrated
A_000414	noIPR	unintegrated	unintegrated	seg (SEG)
A_000414	noIPR	unintegrated	unintegrated
A_000415	noIPR	unintegrated	unintegrated	seg (SEG)
A_000415	noIPR	unintegrated	unintegrated
A_000416	noIPR	unintegrated	unintegrated	seg (SEG)
A_000416	noIPR	unintegrated	unintegrated
A_000417	noIPR	unintegrated	unintegrated	seg (SEG)
A_000417	noIPR	unintegrated	unintegrated
A_000418	noIPR	unintegrated	unintegrated	seg (SEG)
A_000418	noIPR	unintegrated	unintegrated	SignalP-NN(euk) (SIGNALP)
A_000418	noIPR	unintegrated	unintegrated	tmhmm (TMHMM)
A_000418	noIPR	unintegrated	unintegrated
A_000419	noIPR	unintegrated	unintegrated	seg (SEG)
A_000419	noIPR	unintegrated	unintegrated	SignalP-NN(euk) (SIGNALP)
A_000419	noIPR	unintegrated	unintegrated	tmhmm (TMHMM)
A_000419	noIPR	unintegrated	unintegrated
A_000420	noIPR	unintegrated	unintegrated	seg (SEG)
A_000420	noIPR	unintegrated	unintegrated	SignalP-NN(euk) (SIGNALP)
A_000420	noIPR	unintegrated	unintegrated	tmhmm (TMHMM)
A_000420	noIPR	unintegrated	unintegrated
A_000421	noIPR	unintegrated	unintegrated	PTHR24215 (PANTHER)
A_000421	noIPR	unintegrated	unintegrated	PTHR24215:SF72 (PANTHER)
A_000421	noIPR	unintegrated	unintegrated	seg (SEG)
A_000421	noIPR	unintegrated	unintegrated	SSF57716 (SUPERFAMILY)
A_000421	noIPR	unintegrated	unintegrated
A_000421	IPR001781	Zinc finger, LIM-type	Domain	G3DSA:2.10.110.10 (GENE3D)
A_000421	IPR001781	Zinc finger, LIM-type	Domain	PF00412 (PFAM)
A_000421	IPR001781	Zinc finger, LIM-type	Domain	SM00132 (SMART)
A_000421	IPR001781	Zinc finger, LIM-type	Domain	PS00478 (PROSITE)
A_000421	IPR001781	Zinc finger, LIM-type	Domain	PS50023 (PROFILE)
A_000421	IPR001781	Zinc finger, LIM-type	Domain	GO:0008270
A_000422	noIPR	unintegrated	unintegrated	PTHR24215 (PANTHER)
A_000422	noIPR	unintegrated	unintegrated	PTHR24215:SF72 (PANTHER)
A_000422	noIPR	unintegrated	unintegrated	seg (SEG)
A_000422	noIPR	unintegrated	unintegrated	SSF57716 (SUPERFAMILY)
A_000422	noIPR	unintegrated	unintegrated
A_000422	IPR001781	Zinc finger, LIM-type	Domain	G3DSA:2.10.110.10 (GENE3D)
A_000422	IPR001781	Zinc finger, LIM-type	Domain	PF00412 (PFAM)
A_000422	IPR001781	Zinc finger, LIM-type	Domain	SM00132 (SMART)
A_000422	IPR001781	Zinc finger, LIM-type	Domain	PS00478 (PROSITE)
A_000422	IPR001781	Zinc finger, LIM-type	Domain	PS50023 (PROFILE)
A_000422	IPR001781	Zinc finger, LIM-type	Domain	GO:0008270
A_000423	noIPR	unintegrated	unintegrated	seg (SEG)
A_000423	noIPR	unintegrated	unintegrated
A_000424	noIPR	unintegrated	unintegrated	seg (SEG)
A_000424	noIPR	unintegrated	unintegrated
A_000435	noIPR	unintegrated	unintegrated	tmhmm (TMHMM)
A_000435	noIPR	unintegrated	unintegrated
A_000436	noIPR	unintegrated	unintegrated	tmhmm (TMHMM)
A_000436	noIPR	unintegrated	unintegrated
A_000437	noIPR	unintegrated	unintegrated	tmhmm (TMHMM)
A_000437	noIPR	unintegrated	unintegrated
A_000438	noIPR	unintegrated	unintegrated	tmhmm (TMHMM)
A_000438	noIPR	unintegrated	unintegrated
A_000441	noIPR	unintegrated	unintegrated	SignalP-NN(euk) (SIGNALP)
A_000441	noIPR	unintegrated	unintegrated	tmhmm (TMHMM)
A_000441	noIPR	unintegrated	unintegrated
A_000442	noIPR	unintegrated	unintegrated	seg (SEG)
A_000442	noIPR	unintegrated	unintegrated	SignalP-NN(euk) (SIGNALP)
A_000442	noIPR	unintegrated	unintegrated	tmhmm (TMHMM)
A_000442	noIPR	unintegrated	unintegrated
A_000443	noIPR	unintegrated	unintegrated	SignalP-NN(euk) (SIGNALP)
A_000443	noIPR	unintegrated	unintegrated	tmhmm (TMHMM)
A_000443	noIPR	unintegrated	unintegrated
A_000444	noIPR	unintegrated	unintegrated	seg (SEG)
A_000444	noIPR	unintegrated	unintegrated	SignalP-NN(euk) (SIGNALP)
A_000444	noIPR	unintegrated	unintegrated	tmhmm (TMHMM)
A_000444	noIPR	unintegrated	unintegrated
A_000445	noIPR	unintegrated	unintegrated	SignalP-NN(euk) (SIGNALP)
A_000445	noIPR	unintegrated	unintegrated
A_000446	noIPR	unintegrated	unintegrated	SignalP-NN(euk) (SIGNALP)
A_000446	noIPR	unintegrated	unintegrated
A_000447	noIPR	unintegrated	unintegrated	seg (SEG)
A_000447	noIPR	unintegrated	unintegrated	SignalP-NN(euk) (SIGNALP)
A_000447	noIPR	unintegrated	unintegrated	tmhmm (TMHMM)
A_000447	noIPR	unintegrated	unintegrated
A_000448	IPR001478	PDZ/DHR/GLGF	Domain	PF00595 (PFAM)
A_000448	IPR001478	PDZ/DHR/GLGF	Domain	SM00228 (SMART)
A_000448	IPR001478	PDZ/DHR/GLGF	Domain	PS50106 (PROFILE)
A_000448	IPR001478	PDZ/DHR/GLGF	Domain	SSF50156 (SUPERFAMILY)
A_000448	IPR001478	PDZ/DHR/GLGF	Domain	GO:0005515
A_000448	noIPR	unintegrated	unintegrated	G3DSA:2.30.42.10 (GENE3D)
A_000448	noIPR	unintegrated	unintegrated	PTHR24214 (PANTHER)
A_000448	noIPR	unintegrated	unintegrated	PTHR24214:SF107 (PANTHER)
A_000448	noIPR	unintegrated	unintegrated	seg (SEG)
A_000448	noIPR	unintegrated	unintegrated
A_000448	IPR006643	ZASP	Domain	SM00735 (SMART)
A_000448	IPR006643	ZASP	Domain
A_000449	noIPR	unintegrated	unintegrated	seg (SEG)
A_000449	noIPR	unintegrated	unintegrated
A_000450	noIPR	unintegrated	unintegrated	seg (SEG)
A_000450	noIPR	unintegrated	unintegrated	SignalP-NN(euk) (SIGNALP)
A_000450	noIPR	unintegrated	unintegrated
A_000454	noIPR	unintegrated	unintegrated	SignalP-NN(euk) (SIGNALP)
A_000454	noIPR	unintegrated	unintegrated	tmhmm (TMHMM)
A_000454	noIPR	unintegrated	unintegrated
A_000455	noIPR	unintegrated	unintegrated	seg (SEG)
A_000455	noIPR	unintegrated	unintegrated	tmhmm (TMHMM)
A_000455	noIPR	unintegrated	unintegrated
A_000458	noIPR	unintegrated	unintegrated	seg (SEG)
A_000458	noIPR	unintegrated	unintegrated	tmhmm (TMHMM)
A_000458	noIPR	unintegrated	unintegrated
A_000459	IPR009056	Cytochrome c domain	Domain	G3DSA:1.10.760.10 (GENE3D)
A_000459	IPR009056	Cytochrome c domain	Domain	PS51007 (PROFILE)
A_000459	IPR009056	Cytochrome c domain	Domain	SSF46626 (SUPERFAMILY)
A_000459	IPR009056	Cytochrome c domain	Domain	GO:0005506
A_000459	IPR009056	Cytochrome c domain	Domain	GO:0009055
A_000459	IPR009056	Cytochrome c domain	Domain	GO:0020037
A_000459	IPR002326	Cytochrome c1	Family	PR00603 (PRINTS)
A_000459	IPR002326	Cytochrome c1	Family	PTHR10266 (PANTHER)
A_000459	IPR002326	Cytochrome c1	Family	PF02167 (PFAM)
A_000459	IPR002326	Cytochrome c1	Family	GO:0005506
A_000459	IPR002326	Cytochrome c1	Family	GO:0009055
A_000459	IPR002326	Cytochrome c1	Family	GO:0020037
A_000459	IPR021157	Cytochrome c1, transmembrane anchor, C-terminal	Domain	G3DSA:1.20.5.100 (GENE3D)
A_000459	IPR021157	Cytochrome c1, transmembrane anchor, C-terminal	Domain	SSF81496 (SUPERFAMILY)
A_000459	IPR021157	Cytochrome c1, transmembrane anchor, C-terminal	Domain
A_000459	noIPR	unintegrated	unintegrated	seg (SEG)
A_000459	noIPR	unintegrated	unintegrated	tmhmm (TMHMM)
A_000459	noIPR	unintegrated	unintegrated
A_000460	noIPR	unintegrated	unintegrated	PTHR15138 (PANTHER)
A_000460	noIPR	unintegrated	unintegrated	PTHR15138:SF6 (PANTHER)
A_000460	noIPR	unintegrated	unintegrated
A_000461	noIPR	unintegrated	unintegrated	seg (SEG)
A_000461	noIPR	unintegrated	unintegrated	SignalP-NN(euk) (SIGNALP)
A_000461	noIPR	unintegrated	unintegrated	tmhmm (TMHMM)
A_000461	noIPR	unintegrated	unintegrated
A_000462	noIPR	unintegrated	unintegrated	coil (COIL)
A_000462	noIPR	unintegrated	unintegrated	seg (SEG)
A_000462	noIPR	unintegrated	unintegrated
A_000463	noIPR	unintegrated	unintegrated	seg (SEG)
A_000463	noIPR	unintegrated	unintegrated	SignalP-NN(euk) (SIGNALP)
A_000463	noIPR	unintegrated	unintegrated	tmhmm (TMHMM)
A_000463	noIPR	unintegrated	unintegrated
A_000464	noIPR	unintegrated	unintegrated	SignalP-NN(euk) (SIGNALP)
A_000464	noIPR	unintegrated	unintegrated	tmhmm (TMHMM)
A_000464	noIPR	unintegrated	unintegrated
A_000465	noIPR	unintegrated	unintegrated	tmhmm (TMHMM)
A_000465	noIPR	unintegrated	unintegrated
A_000466	noIPR	unintegrated	unintegrated	SignalP-NN(euk) (SIGNALP)
A_000466	noIPR	unintegrated	unintegrated	tmhmm (TMHMM)
A_000466	noIPR	unintegrated	unintegrated
A_000467	IPR011497	Protease inhibitor, Kazal-type	Domain	PF07648 (PFAM)
A_000467	IPR011497	Protease inhibitor, Kazal-type	Domain
A_000467	IPR002350	Proteinase inhibitor I1, Kazal	Domain	SM00280 (SMART)
A_000467	IPR002350	Proteinase inhibitor I1, Kazal	Domain	GO:0005515
A_000467	noIPR	unintegrated	unintegrated	G3DSA:3.30.60.30 (GENE3D)
A_000467	noIPR	unintegrated	unintegrated	PTHR21312 (PANTHER)
A_000467	noIPR	unintegrated	unintegrated	PS51465 (PROFILE)
A_000467	noIPR	unintegrated	unintegrated	SignalP-NN(euk) (SIGNALP)
A_000467	noIPR	unintegrated	unintegrated	tmhmm (TMHMM)
A_000467	noIPR	unintegrated	unintegrated	SSF100895 (SUPERFAMILY)
A_000467	noIPR	unintegrated	unintegrated
A_000468	IPR011497	Protease inhibitor, Kazal-type	Domain	PF07648 (PFAM)
A_000468	IPR011497	Protease inhibitor, Kazal-type	Domain
A_000468	IPR002350	Proteinase inhibitor I1, Kazal	Domain	SM00280 (SMART)
A_000468	IPR002350	Proteinase inhibitor I1, Kazal	Domain	GO:0005515
A_000468	noIPR	unintegrated	unintegrated	G3DSA:3.30.60.30 (GENE3D)
A_000468	noIPR	unintegrated	unintegrated	PTHR21312 (PANTHER)
A_000468	noIPR	unintegrated	unintegrated	PS51465 (PROFILE)
A_000468	noIPR	unintegrated	unintegrated	SignalP-NN(euk) (SIGNALP)
A_000468	noIPR	unintegrated	unintegrated	tmhmm (TMHMM)
A_000468	noIPR	unintegrated	unintegrated	SSF100895 (SUPERFAMILY)
A_000468	noIPR	unintegrated	unintegrated
A_000470	noIPR	unintegrated	unintegrated	SignalP-NN(euk) (SIGNALP)
A_000470	noIPR	unintegrated	unintegrated	tmhmm (TMHMM)
A_000470	noIPR	unintegrated	unintegrated
A_000471	noIPR	unintegrated	unintegrated	SignalP-NN(euk) (SIGNALP)
A_000471	noIPR	unintegrated	unintegrated	tmhmm (TMHMM)
A_000471	noIPR	unintegrated	unintegrated
A_000472	noIPR	unintegrated	unintegrated	SignalP-NN(euk) (SIGNALP)
A_000472	noIPR	unintegrated	unintegrated	tmhmm (TMHMM)
A_000472	noIPR	unintegrated	unintegrated
A_000473	noIPR	unintegrated	unintegrated	seg (SEG)
A_000473	noIPR	unintegrated	unintegrated
A_000474	noIPR	unintegrated	unintegrated	seg (SEG)
A_000474	noIPR	unintegrated	unintegrated
A_000480	noIPR	unintegrated	unintegrated	SignalP-NN(euk) (SIGNALP)
A_000480	noIPR	unintegrated	unintegrated
A_000481	noIPR	unintegrated	unintegrated	SignalP-NN(euk) (SIGNALP)
A_000481	noIPR	unintegrated	unintegrated
A_000482	noIPR	unintegrated	unintegrated	SignalP-NN(euk) (SIGNALP)
A_000482	noIPR	unintegrated	unintegrated
A_000484	noIPR	unintegrated	unintegrated	seg (SEG)
A_000484	noIPR	unintegrated	unintegrated	tmhmm (TMHMM)
A_000484	noIPR	unintegrated	unintegrated
A_000485	IPR019132	Taxilin	Family	PF09728 (PFAM)
A_000485	IPR019132	Taxilin	Family
A_000485	noIPR	unintegrated	unintegrated	coil (COIL)
A_000485	noIPR	unintegrated	unintegrated	PTHR16127 (PANTHER)
A_000485	noIPR	unintegrated	unintegrated	PTHR16127:SF11 (PANTHER)
A_000485	noIPR	unintegrated	unintegrated	seg (SEG)
A_000485	noIPR	unintegrated	unintegrated
A_000500	IPR000096	Serum amyloid A protein	Family	PR00306 (PRINTS)
A_000500	IPR000096	Serum amyloid A protein	Family	PTHR23424 (PANTHER)
A_000500	IPR000096	Serum amyloid A protein	Family	PF00277 (PFAM)
A_000500	IPR000096	Serum amyloid A protein	Family	SM00197 (SMART)
A_000500	IPR000096	Serum amyloid A protein	Family	GO:0005576
A_000500	IPR000096	Serum amyloid A protein	Family	GO:0006953
A_000500	noIPR	unintegrated	unintegrated	seg (SEG)
A_000500	noIPR	unintegrated	unintegrated	SignalP-NN(euk) (SIGNALP)
A_000500	noIPR	unintegrated	unintegrated	tmhmm (TMHMM)
A_000500	noIPR	unintegrated	unintegrated
A_000501	IPR000096	Serum amyloid A protein	Family	PR00306 (PRINTS)
A_000501	IPR000096	Serum amyloid A protein	Family	PTHR23424 (PANTHER)
A_000501	IPR000096	Serum amyloid A protein	Family	PF00277 (PFAM)
A_000501	IPR000096	Serum amyloid A protein	Family	SM00197 (SMART)
A_000501	IPR000096	Serum amyloid A protein	Family	GO:0005576
A_000501	IPR000096	Serum amyloid A protein	Family	GO:0006953
A_000501	noIPR	unintegrated	unintegrated	seg (SEG)
A_000501	noIPR	unintegrated	unintegrated	SignalP-NN(euk) (SIGNALP)
A_000501	noIPR	unintegrated	unintegrated	tmhmm (TMHMM)
A_000501	noIPR	unintegrated	unintegrated
A_000502	IPR000096	Serum amyloid A protein	Family	PR00306 (PRINTS)
A_000502	IPR000096	Serum amyloid A protein	Family	PTHR23424 (PANTHER)
A_000502	IPR000096	Serum amyloid A protein	Family	PF00277 (PFAM)
A_000502	IPR000096	Serum amyloid A protein	Family	SM00197 (SMART)
A_000502	IPR000096	Serum amyloid A protein	Family	GO:0005576
A_000502	IPR000096	Serum amyloid A protein	Family	GO:0006953
A_000502	noIPR	unintegrated	unintegrated	seg (SEG)
A_000502	noIPR	unintegrated	unintegrated	SignalP-NN(euk) (SIGNALP)
A_000502	noIPR	unintegrated	unintegrated	tmhmm (TMHMM)
A_000502	noIPR	unintegrated	unintegrated
A_000503	IPR000096	Serum amyloid A protein	Family	PR00306 (PRINTS)
A_000503	IPR000096	Serum amyloid A protein	Family	PIRSF002472 (PIR)
A_000503	IPR000096	Serum amyloid A protein	Family	PTHR23424 (PANTHER)
A_000503	IPR000096	Serum amyloid A protein	Family	PF00277 (PFAM)
A_000503	IPR000096	Serum amyloid A protein	Family	SM00197 (SMART)
A_000503	IPR000096	Serum amyloid A protein	Family	GO:0005576
A_000503	IPR000096	Serum amyloid A protein	Family	GO:0006953
A_000503	noIPR	unintegrated	unintegrated	seg (SEG)
A_000503	noIPR	unintegrated	unintegrated	SignalP-NN(euk) (SIGNALP)
A_000503	noIPR	unintegrated	unintegrated	tmhmm (TMHMM)
A_000503	noIPR	unintegrated	unintegrated
A_000504	IPR000096	Serum amyloid A protein	Family	PR00306 (PRINTS)
A_000504	IPR000096	Serum amyloid A protein	Family	PTHR23424 (PANTHER)
A_000504	IPR000096	Serum amyloid A protein	Family	PF00277 (PFAM)
A_000504	IPR000096	Serum amyloid A protein	Family	SM00197 (SMART)
A_000504	IPR000096	Serum amyloid A protein	Family	GO:0005576
A_000504	IPR000096	Serum amyloid A protein	Family	GO:0006953
A_000504	noIPR	unintegrated	unintegrated	seg (SEG)
A_000504	noIPR	unintegrated	unintegrated	SignalP-NN(euk) (SIGNALP)
A_000504	noIPR	unintegrated	unintegrated	tmhmm (TMHMM)
A_000504	noIPR	unintegrated	unintegrated
A_000505	IPR000096	Serum amyloid A protein	Family	PR00306 (PRINTS)
A_000505	IPR000096	Serum amyloid A protein	Family	PIRSF002472 (PIR)
A_000505	IPR000096	Serum amyloid A protein	Family	PTHR23424 (PANTHER)
A_000505	IPR000096	Serum amyloid A protein	Family	PF00277 (PFAM)
A_000505	IPR000096	Serum amyloid A protein	Family	SM00197 (SMART)
A_000505	IPR000096	Serum amyloid A protein	Family	GO:0005576
A_000505	IPR000096	Serum amyloid A protein	Family	GO:0006953
A_000505	noIPR	unintegrated	unintegrated	seg (SEG)
A_000505	noIPR	unintegrated	unintegrated	SignalP-NN(euk) (SIGNALP)
A_000505	noIPR	unintegrated	unintegrated	tmhmm (TMHMM)
A_000505	noIPR	unintegrated	unintegrated
A_000507	IPR000990	Innexin	Family	PTHR11893 (PANTHER)
A_000507	IPR000990	Innexin	Family	PF00876 (PFAM)
A_000507	IPR000990	Innexin	Family	PS51013 (PROFILE)
A_000507	IPR000990	Innexin	Family	GO:0005921
A_000507	noIPR	unintegrated	unintegrated	coil (COIL)
A_000507	noIPR	unintegrated	unintegrated	seg (SEG)
A_000507	noIPR	unintegrated	unintegrated	tmhmm (TMHMM)
A_000507	noIPR	unintegrated	unintegrated
A_000510	noIPR	unintegrated	unintegrated	SignalP-NN(euk) (SIGNALP)
A_000510	noIPR	unintegrated	unintegrated	tmhmm (TMHMM)
A_000510	noIPR	unintegrated	unintegrated
A_000512	IPR002018	Carboxylesterase, type B	Domain	PF00135 (PFAM)
A_000512	IPR002018	Carboxylesterase, type B	Domain
A_000512	noIPR	unintegrated	unintegrated	G3DSA:3.40.50.1820 (GENE3D)
A_000512	noIPR	unintegrated	unintegrated	PTHR11559 (PANTHER)
A_000512	noIPR	unintegrated	unintegrated	SSF53474 (SUPERFAMILY)
A_000512	noIPR	unintegrated	unintegrated
A_000513	IPR002018	Carboxylesterase, type B	Domain	PF00135 (PFAM)
A_000513	IPR002018	Carboxylesterase, type B	Domain
A_000513	noIPR	unintegrated	unintegrated	G3DSA:3.40.50.1820 (GENE3D)
A_000513	noIPR	unintegrated	unintegrated	PTHR11559 (PANTHER)
A_000513	noIPR	unintegrated	unintegrated	SSF53474 (SUPERFAMILY)
A_000513	noIPR	unintegrated	unintegrated
A_000514	IPR004001	Actin, conserved site	Conserved_site	PS00432 (PROSITE)
A_000514	IPR004001	Actin, conserved site	Conserved_site	GO:0005524
A_000514	IPR004000	Actin-like	Family	PTHR11937 (PANTHER)
[truncated: 35,600 more rows]
