# Supplementary material for: Transcriptomics of a Giant Freshwater Prawn (Macrobrachium rosenbergii): De Novo Assembly, Annotation and Marker Discovery
Source: PLoS One. 2011 Dec 8;6(12):e27938. doi: 10.1371/journal.pone.0027938 (PMC3234237; doi:10.1371/journal.pone.0027938)
Supplement: Table S5 — Putative SNPs and Indels in M . rosenbergii contig sequences. (XLSX) [file pone.0027938.s005.xlsx]

## Sheet: GFP SNP Contigs
	Reference	Start	End	Reference	Variant	Total	Variant
Library	Accession Number	Position	Position	Nucleotide	Nucleotide	Depth	Frequency
Muscle	A_000006	494	494	C	T	209	0.16
Muscle	A_000006	958	958	G	A	282	0.24
Muscle	A_000006	1088	1088	G	A	278	0.17
Muscle	A_000006	1670	1670	C	A	251	0.2
Muscle	A_000006	2204	2204	T	C	291	0.21
Muscle	A_000006	2732	2732	G	A	249	0.21
Muscle	A_000006	3719	3719	C	A	317	0.33
Testicle	A_000007	222	222	T	C	5	0.6
Muscle	A_000008	16	16	G	A	34	0.53
Muscle	A_000008	50	50	C	A	57	0.46
Muscle	A_000008	56	56	G	A	64	0.44
Muscle	A_000008	63	63	T	G	71	0.84
Muscle	A_000008	68	68	T	C	78	0.85
Muscle	A_000008	113	113	T	C	113	0.85
Muscle	A_000008	146	146	T	C	124	0.9
Muscle	A_000008	155	155	C	T	131	0.44
Muscle	A_000008	182	182	C	T	151	0.89
Muscle	A_000008	203	203	T	C	168	0.86
Muscle	A_000008	206	206	C	T	169	0.86
Muscle	A_000008	209	209	C	T	171	0.87
Muscle	A_000008	218	218	C	T	179	0.88
Muscle	A_000008	263	263	C	T	225	0.9
Muscle	A_000008	297	297	G	A	257	0.92
Muscle	A_000008	344	344	A	G	278	0.39
Muscle	A_000008	404	404	C	A	308	0.43
Muscle	A_000008	404	404	C	T	308	0.49
Muscle	A_000008	464	464	A	G	267	0.85
Muscle	A_000008	495	495	C	G	247	0.92
Muscle	A_000008	503	503	C	T	247	0.91
Muscle	A_000008	541	541	G	A	233	0.91
Muscle	A_000008	572	572	C	T	209	0.89
Muscle	A_000008	593	593	T	C	202	0.42
Muscle	A_000008	603	603	A	T	194	0.91
Muscle	A_000008	604	604	A	G	192	0.91
Muscle	A_000008	632	632	C	T	169	0.9
Muscle	A_000008	646	646	C	T	144	0.89
Muscle	A_000008	686	686	G	A	107	0.42
Muscle	A_000009	165	165	G	A	266	0.15
Muscle	A_000009	413	413	C	T	140	0.33
Muscle	A_000010	979	979	A	T	238	0.16
Muscle	A_000010	2288	2288	C	T	242	0.15
Muscle	A_000010	2630	2630	T	C	278	0.23
Muscle	A_000010	3227	3227	T	C	206	0.32
Ovary	A_000011	130	130	A	T	6	0.67
Testicle	A_000011	140	140	A	C	7	0.57
Testicle	A_000011	206	206	G	A	7	0.57
Muscle	A_000012	256	256	T	C	42	0.52
Ovary	A_000012	256	256	T	C	66	0.5
Testicle	A_000012	256	256	T	C	32	0.22
Ovary	A_000012	273	273	T	C	65	0.25
Muscle	A_000012	296	296	G	A	39	0.1
Muscle	A_000012	455	455	A	G	55	0.4
Ovary	A_000012	455	455	A	G	80	0.39
Testicle	A_000012	455	455	A	G	43	0.49
Muscle	A_000012	755	755	G	C	65	0.22
Ovary	A_000012	755	755	G	C	72	0.12
Ovary	A_000012	867	867	T	A	53	0.13
Testicle	A_000012	867	867	T	A	24	0.17
Ovary	A_000014	543	543	A	C	68	0.13
Muscle	A_000015	277	277	G	A	216	0.1
Muscle	A_000016	714	714	T	C	182	0.12
Muscle	A_000016	721	721	G	T	178	0.11
Muscle	A_000016	852	852	C	T	165	0.21
Muscle	A_000016	879	879	T	C	166	0.2
Muscle	A_000018	308	308	T	G	202	0.14
Muscle	A_000018	1454	1454	C	T	247	0.19
Ovary	A_000020	740	740	C	T	34	0.21
Ovary	A_000020	752	752	G	C	38	0.29
Ovary	A_000020	818	818	A	G	68	0.32
Ovary	A_000020	992	992	T	C	143	0.11
Muscle	A_000022	242	242	C	A	247	0.17
Muscle	A_000022	392	392	A	C	311	0.36
Muscle	A_000022	515	515	G	A	263	0.17
Muscle	A_000022	524	524	C	T	259	0.16
Muscle	A_000022	814	814	T	C	113	0.38
Muscle	A_000024	23	23	T	C	17	0.76
Muscle	A_000024	65	65	C	T	29	0.31
Muscle	A_000024	128	128	C	T	31	0.61
Muscle	A_000024	138	138	C	A	32	0.56
Muscle	A_000024	140	140	T	A	32	0.56
Muscle	A_000024	179	179	T	C	34	0.53
Muscle	A_000024	230	230	T	C	39	0.46
Muscle	A_000024	254	254	A	G	34	0.12
Muscle	A_000024	275	275	A	G	24	0.12
Muscle	A_000024	329	329	G	A	26	0.12
Muscle	A_000024	338	338	C	G	26	0.12
Muscle	A_000024	344	344	C	A	25	0.12
Muscle	A_000024	350	350	A	T	28	0.25
Muscle	A_000024	359	359	T	C	31	0.39
Muscle	A_000024	374	374	G	C	39	0.15
Muscle	A_000024	383	383	C	T	42	0.31
Muscle	A_000024	398	398	C	T	48	0.15
Muscle	A_000024	401	401	T	A	50	0.18
Muscle	A_000024	413	413	T	C	53	0.28
Muscle	A_000024	419	419	C	T	54	0.61
Muscle	A_000024	437	437	C	T	59	0.19
Muscle	A_000024	446	446	C	A	60	0.35
Muscle	A_000024	449	449	C	G	61	0.16
Muscle	A_000024	458	458	T	C	62	0.15
Muscle	A_000024	461	461	C	T	62	0.4
Muscle	A_000024	482	482	C	T	65	0.34
Muscle	A_000024	497	497	A	T	66	0.71
Muscle	A_000024	542	542	T	C	85	0.12
Muscle	A_000024	548	548	C	T	85	0.54
Muscle	A_000024	556	556	C	T	88	0.49
Muscle	A_000024	569	569	A	G	91	0.15
Muscle	A_000024	596	596	G	A	96	0.27
Muscle	A_000024	602	602	T	C	97	0.62
Muscle	A_000024	626	626	G	C	102	0.16
Muscle	A_000024	641	641	T	C	98	0.1
Muscle	A_000024	644	644	T	A	96	0.62
Muscle	A_000024	647	647	C	G	94	0.61
Muscle	A_000024	650	650	C	T	93	0.6
Muscle	A_000024	656	656	C	T	91	0.7
Muscle	A_000024	668	668	G	A	87	0.53
Muscle	A_000024	671	671	C	T	85	0.56
Muscle	A_000024	674	674	T	C	84	0.11
Muscle	A_000024	686	686	C	T	83	0.54
Muscle	A_000024	704	704	T	C	79	0.71
Muscle	A_000024	707	707	T	C	80	0.59
Muscle	A_000024	710	710	T	C	82	0.59
Muscle	A_000024	713	713	A	G	82	0.7
Muscle	A_000024	716	716	T	C	84	0.31
Muscle	A_000024	746	746	T	C	91	0.11
Muscle	A_000024	768	768	G	T	97	0.56
Muscle	A_000024	773	773	T	C	98	0.11
Muscle	A_000024	779	779	T	C	99	0.14
Muscle	A_000024	800	800	T	C	97	0.27
Muscle	A_000024	809	809	C	T	93	0.56
Muscle	A_000024	842	842	C	T	73	0.31
Muscle	A_000024	854	854	T	A	73	0.48
Muscle	A_000024	899	899	G	A	69	0.46
Muscle	A_000024	902	902	G	A	69	0.55
Muscle	A_000024	908	908	T	C	69	0.51
Muscle	A_000024	938	938	A	G	59	0.73
Muscle	A_000024	941	941	T	C	58	0.71
Muscle	A_000024	944	944	T	C	58	0.64
Muscle	A_000024	950	950	C	T	56	0.11
Muscle	A_000024	962	962	A	G	58	0.76
Muscle	A_000024	968	968	C	T	59	0.49
Muscle	A_000024	989	989	C	T	59	0.14
Muscle	A_000024	1034	1034	G	A	58	0.71
Muscle	A_000024	1037	1037	A	G	57	0.16
Muscle	A_000024	1040	1040	C	T	57	0.68
Muscle	A_000024	1043	1043	T	C	57	0.18
Muscle	A_000024	1058	1058	C	T	51	0.8
Muscle	A_000024	1064	1064	C	T	47	0.11
Testicle	A_000025	15	15	A	G	11	0.55
Testicle	A_000025	43	43	T	A	14	0.57
Testicle	A_000025	66	66	T	G	14	0.36
Testicle	A_000025	72	72	A	T	14	0.29
Testicle	A_000025	108	108	G	C	15	0.47
Testicle	A_000025	121	121	T	C	16	0.62
Testicle	A_000025	140	140	T	C	16	0.44
Testicle	A_000025	168	168	A	C	16	0.19
Testicle	A_000025	185	185	T	C	14	0.5
Testicle	A_000025	265	265	T	C	16	0.62
Testicle	A_000025	291	291	A	G	14	0.43
Testicle	A_000025	402	402	T	C	17	0.29
Testicle	A_000025	406	406	G	A	17	0.29
Testicle	A_000025	416	416	G	A	15	0.33
Testicle	A_000025	435	435	C	T	17	0.24
Testicle	A_000025	743	743	T	C	12	0.58
Testicle	A_000025	778	778	G	A	8	0.5
Testicle	A_000026	11	11	C	T	18	0.72
Testicle	A_000026	21	21	T	G	29	0.45
Testicle	A_000026	32	32	G	A	37	0.92
Testicle	A_000026	40	40	C	T	63	0.95
Testicle	A_000026	61	61	C	T	148	0.14
Testicle	A_000026	74	74	A	G	159	0.26
Testicle	A_000026	79	79	G	C	164	0.27
Testicle	A_000026	123	123	C	T	175	0.11
Testicle	A_000026	137	137	T	C	163	0.66
Testicle	A_000026	142	142	A	T	161	0.88
Testicle	A_000026	147	147	G	C	162	0.12
Testicle	A_000026	169	169	T	C	160	0.95
Testicle	A_000026	173	173	A	G	162	0.27
Testicle	A_000026	193	193	T	A	158	0.28
Testicle	A_000026	197	197	T	C	157	0.24
Testicle	A_000026	204	204	A	T	152	0.42
Testicle	A_000026	209	209	C	G	152	0.28
Testicle	A_000026	210	210	A	G	150	0.12
Testicle	A_000026	215	215	G	A	149	0.39
Testicle	A_000026	233	233	A	G	143	0.24
Testicle	A_000026	234	234	C	T	143	0.81
Testicle	A_000026	242	242	G	T	117	0.28
Testicle	A_000026	261	261	T	C	35	0.2
Testicle	A_000026	291	291	T	C	36	0.31
Testicle	A_000026	306	306	C	T	36	0.19
Testicle	A_000026	312	312	A	C	36	0.69
Testicle	A_000026	326	326	A	G	35	0.2
Testicle	A_000026	334	334	C	T	35	0.2
Testicle	A_000026	339	339	G	A	31	0.26
Testicle	A_000026	343	343	A	C	31	0.45
Testicle	A_000026	359	359	G	A	31	0.26
Testicle	A_000026	360	360	A	G	31	0.23
Testicle	A_000026	363	363	A	G	31	0.48
Testicle	A_000026	365	365	A	T	31	0.23
Testicle	A_000026	375	375	A	G	31	0.26
Testicle	A_000026	382	382	C	A	30	0.27
Testicle	A_000026	384	384	A	G	30	0.23
Testicle	A_000026	386	386	A	G	30	0.4
Testicle	A_000026	390	390	G	A	30	0.27
Testicle	A_000026	391	391	T	C	30	0.27
Testicle	A_000026	392	392	G	T	30	0.23
Testicle	A_000026	407	407	T	C	35	0.43
Testicle	A_000026	415	415	A	C	63	0.44
Testicle	A_000026	425	425	G	A	63	0.51
Testicle	A_000026	452	452	T	A	57	0.49
Testicle	A_000026	501	501	G	A	15	0.6
Testicle	A_000027	121	121	A	G	6	0.5
Testicle	A_000027	222	222	A	G	15	0.2
Testicle	A_000027	227	227	C	T	15	0.2
Testicle	A_000027	228	228	A	G	15	0.2
Testicle	A_000027	231	231	C	T	15	0.2
Testicle	A_000027	253	253	T	A	15	0.2
Testicle	A_000027	290	290	T	C	14	0.21
Testicle	A_000027	296	296	A	C	14	0.21
Testicle	A_000027	302	302	T	C	14	0.21
Testicle	A_000027	447	447	A	G	13	0.38
Testicle	A_000027	479	479	T	A	11	0.27
Testicle	A_000028	181	181	A	G	14	0.29
Testicle	A_000028	193	193	A	G	14	0.29
Testicle	A_000028	221	221	T	A	14	0.29
Testicle	A_000028	268	268	T	C	16	0.25
Testicle	A_000028	278	278	G	A	16	0.25
Testicle	A_000028	280	280	T	C	16	0.25
Testicle	A_000028	473	473	G	C	8	0.5
Muscle	A_000104	383	383	C	A	12	0.25
Muscle	A_000104	1308	1308	T	C	6	0.5
Muscle	A_000104	1796	1796	G	C	25	0.28
Muscle	A_000104	1874	1874	T	C	22	0.18
Muscle	A_000104	1973	1973	T	A	19	0.16
Muscle	A_000104	2996	2996	C	T	14	0.21
Muscle	A_000104	3682	3682	C	T	20	0.55
Muscle	A_000104	3697	3697	A	G	19	0.21
Muscle	A_000104	3910	3910	T	C	19	0.37
Muscle	A_000104	3927	3927	C	T	19	0.42
Muscle	A_000104	4048	4048	G	T	23	0.3
Muscle	A_000104	4190	4190	T	C	10	0.5
Muscle	A_000117	76	76	T	C	61	0.16
Muscle	A_000117	82	82	T	A	63	0.19
Muscle	A_000117	85	85	G	A	65	0.18
Muscle	A_000117	292	292	G	A	144	0.12
Muscle	A_000117	328	328	C	T	137	0.26
Muscle	A_000117	551	551	T	C	50	0.18
Muscle	A_000129	961	961	C	T	6	0.5
Muscle	A_000129	1042	1042	A	G	4	0.75
Ovary	A_000168	1331	1331	G	A	7	0.43
Ovary	A_000168	1379	1379	T	G	8	0.62
Ovary	A_000168	1497	1497	T	C	6	0.5
Ovary	A_000171	3054	3054	T	A	7	0.57
Ovary	A_000171	3060	3060	T	C	7	0.71
Ovary	A_000178	409	409	A	T	4	0.75
Ovary	A_000178	422	422	A	T	4	0.75
Ovary	A_000182	720	720	G	A	3	1
Muscle	A_000187	610	610	T	C	15	0.27
Muscle	A_000187	724	724	C	T	12	0.58
Ovary	A_000204	2108	2108	A	C	39	0.49
Ovary	A_000204	2123	2123	T	C	39	0.49
Ovary	A_000204	2402	2402	T	C	7	0.43
Testicle	A_000213	563	563	A	G	7	1
Testicle	A_000213	607	607	T	A	43	0.16
Testicle	A_000213	624	624	C	T	51	1
Testicle	A_000213	649	649	T	G	11	0.64
Testicle	A_000214	476	476	T	C	4	1
Ovary	A_000226	1090	1090	T	C	6	1
Ovary	A_000227	1022	1022	T	C	5	1
Ovary	A_000230	372	372	C	T	9	0.44
Ovary	A_000230	702	702	T	C	6	1
Ovary	A_000231	797	797	A	G	10	0.6
Ovary	A_000232	312	312	A	T	4	1
Ovary	A_000241	170	170	G	A	8	0.37
Ovary	A_000241	338	338	C	A	8	0.87
Ovary	A_000242	183	183	T	G	13	0.31
Ovary	A_000242	188	188	C	T	14	0.36
Ovary	A_000242	220	220	T	C	17	0.35
Ovary	A_000242	221	221	G	A	17	0.18
Ovary	A_000242	366	366	A	C	11	0.36
Ovary	A_000242	417	417	G	A	12	0.42
Ovary	A_000242	454	454	A	C	14	0.43
Ovary	A_000242	457	457	A	G	14	0.29
Ovary	A_000242	458	458	C	T	14	0.21
Ovary	A_000242	494	494	C	T	15	0.2
Ovary	A_000242	513	513	G	A	15	0.2
Ovary	A_000242	669	669	C	T	6	0.5
Ovary	A_000248	313	313	C	G	4	0.75
Ovary	A_000250	241	241	G	A	7	0.57
Testicle	A_000278	2466	2466	T	C	11	0.36
Testicle	A_000278	2725	2725	A	G	12	0.33
Testicle	A_000278	2794	2794	A	G	11	0.55
Testicle	A_000278	2855	2855	T	A	14	0.29
Ovary	A_000291	125	125	C	T	5	1
Ovary	A_000291	171	171	T	C	5	1
Ovary	A_000291	174	174	T	C	5	0.8
Ovary	A_000291	180	180	G	C	5	0.8
Ovary	A_000291	226	226	T	C	5	1
Ovary	A_000291	231	231	G	A	5	1
Ovary	A_000291	237	237	G	T	5	1
Ovary	A_000291	257	257	G	A	5	0.8
Ovary	A_000294	3164	3164	G	A	15	0.2
Ovary	A_000294	3173	3173	T	A	16	0.19
Ovary	A_000294	3213	3213	G	A	18	0.17
Ovary	A_000294	3289	3289	A	C	8	0.5
Ovary	A_000294	3431	3431	G	A	20	0.45
Ovary	A_000295	3626	3626	T	C	15	0.2
Ovary	A_000296	3477	3477	C	T	3	1
Ovary	A_000297	3270	3270	T	C	3	1
Ovary	A_000297	3295	3295	G	A	5	0.8
Ovary	A_000297	3298	3298	C	T	5	0.8
Ovary	A_000299	139	139	T	C	9	0.44
Ovary	A_000299	248	248	G	A	13	0.46
Ovary	A_000299	314	314	T	C	13	0.38
Ovary	A_000299	335	335	G	A	12	0.42
Ovary	A_000299	385	385	T	A	9	0.44
Ovary	A_000299	436	436	C	A	4	0.75
Ovary	A_000300	77	77	T	A	4	1
Ovary	A_000300	104	104	A	G	4	1
Ovary	A_000301	325	325	T	C	11	0.45
Ovary	A_000301	348	348	T	A	11	0.45
Ovary	A_000301	352	352	T	C	11	0.45
Ovary	A_000301	381	381	G	A	9	0.33
Ovary	A_000301	389	389	T	C	9	0.56
Ovary	A_000301	399	399	C	T	9	0.56
Ovary	A_000301	406	406	A	G	9	0.56
Ovary	A_000301	414	414	A	G	8	0.5
Ovary	A_000301	423	423	A	C	7	0.57
Ovary	A_000304	94	94	C	G	29	0.14
Ovary	A_000304	243	243	T	C	71	0.28
Ovary	A_000304	365	365	A	C	88	0.17
Ovary	A_000304	392	392	G	T	84	0.11
Ovary	A_000304	449	449	A	G	79	0.33
Ovary	A_000305	94	94	C	G	5	1
Muscle	A_000312	579	579	T	A	9	0.33
Muscle	A_000314	579	579	T	A	8	0.87
Muscle	A_000316	455	455	T	A	15	0.27
Ovary	A_000324	327	327	G	T	7	0.43
Ovary	A_000324	363	363	T	C	7	0.43
Ovary	A_000324	386	386	A	G	6	0.83
Ovary	A_000324	394	394	A	G	6	0.67
Ovary	A_000324	416	416	A	G	4	0.75
Testicle	A_000345	2401	2401	C	G	9	0.44
Testicle	A_000345	2575	2575	G	T	11	0.27
Testicle	A_000345	2594	2594	C	G	10	0.5
Ovary	A_000350	2079	2079	G	A	21	0.24
Ovary	A_000350	2226	2226	G	A	31	0.29
Ovary	A_000350	2368	2368	T	A	16	0.31
Ovary	A_000350	2393	2393	G	T	12	0.25
Ovary	A_000351	2030	2030	A	G	3	1
Ovary	A_000351	2065	2065	G	T	3	1
Ovary	A_000353	1463	1463	A	G	4	0.75
Ovary	A_000353	1495	1495	A	G	5	0.6
Ovary	A_000377	63	63	C	T	6	0.83
Ovary	A_000377	125	125	C	G	6	0.83
Ovary	A_000377	148	148	T	A	6	0.83
Ovary	A_000378	27	27	T	G	4	1
Ovary	A_000378	46	46	G	A	5	0.6
Ovary	A_000378	47	47	T	C	5	1
Ovary	A_000378	130	130	G	A	5	0.6
Ovary	A_000378	268	268	A	T	5	1
Ovary	A_000381	126	126	G	C	5	0.6
Ovary	A_000381	323	323	G	C	3	1
Ovary	A_000395	424	424	T	C	5	0.6
Ovary	A_000395	593	593	T	C	9	1
Ovary	A_000398	587	587	T	C	5	0.8
Ovary	A_000402	655	655	A	C	6	0.83
Ovary	A_000406	273	273	G	T	12	0.33
Ovary	A_000406	298	298	T	A	11	0.36
Ovary	A_000406	355	355	A	G	11	0.36
Muscle	A_000407	633	633	C	T	6	0.83
Muscle	A_000407	664	664	T	C	6	1
Muscle	A_000407	679	679	T	C	9	0.67
Muscle	A_000407	685	685	T	C	10	0.7
Muscle	A_000407	688	688	C	T	10	0.7
Muscle	A_000407	703	703	G	C	16	0.69
Muscle	A_000407	721	721	T	A	16	0.75
Muscle	A_000407	724	724	T	G	16	0.69
Muscle	A_000407	745	745	G	A	17	0.76
Muscle	A_000407	748	748	C	T	17	0.76
Muscle	A_000407	763	763	C	T	17	0.76
Muscle	A_000407	805	805	T	C	17	0.76
Muscle	A_000407	808	808	A	G	17	0.76
Muscle	A_000407	811	811	C	T	17	0.76
Muscle	A_000407	823	823	T	C	19	0.53
Muscle	A_000407	850	850	T	C	19	0.58
Muscle	A_000407	874	874	T	C	19	0.79
Muscle	A_000407	886	886	C	T	19	0.84
Muscle	A_000407	919	919	C	T	18	0.72
Muscle	A_000407	967	967	A	G	18	0.78
Muscle	A_000407	991	991	T	C	18	0.78
Muscle	A_000407	1009	1009	G	A	18	0.72
Muscle	A_000407	1018	1018	T	C	17	0.76
Muscle	A_000407	1057	1057	T	G	15	0.27
Muscle	A_000407	1107	1107	T	A	5	0.8
Muscle	A_000409	27	27	G	A	31	0.97
Muscle	A_000409	39	39	T	C	51	0.96
Muscle	A_000409	54	54	G	A	67	0.88
Muscle	A_000409	60	60	T	C	77	0.93
Muscle	A_000409	75	75	T	G	89	0.94
Muscle	A_000409	102	102	T	A	112	0.93
Muscle	A_000409	105	105	T	G	114	0.88
Muscle	A_000409	108	108	C	T	118	0.93
Muscle	A_000409	126	126	G	A	138	0.89
Muscle	A_000409	129	129	C	T	142	0.94
Muscle	A_000409	144	144	C	T	152	0.94
Muscle	A_000409	168	168	T	C	167	0.96
Muscle	A_000409	174	174	T	C	174	0.88
Muscle	A_000409	193	193	T	C	183	0.96
Muscle	A_000409	226	226	G	T	195	0.94
Muscle	A_000409	255	255	T	C	211	0.94
Muscle	A_000409	258	258	C	T	220	0.21
Muscle	A_000409	267	267	C	T	223	0.95
Muscle	A_000409	300	300	C	T	234	0.22
Muscle	A_000409	312	312	T	A	236	0.96
Muscle	A_000409	354	354	G	A	268	0.15
Muscle	A_000409	357	357	G	A	266	0.9
Muscle	A_000409	390	390	G	A	249	0.95
Muscle	A_000409	426	426	T	C	192	0.1
Muscle	A_000409	488	488	T	A	110	0.95
Muscle	A_000409	498	498	C	T	102	0.97
Ovary	A_000418	105	105	T	A	6	0.5
Muscle	A_000420	30	30	G	C	12	0.75
Ovary	A_000420	30	30	G	C	24	0.96
Testicle	A_000420	30	30	G	C	8	0.87
Muscle	A_000420	72	72	A	C	8	0.5
Ovary	A_000420	72	72	A	C	13	0.69
Testicle	A_000420	72	72	A	C	7	0.57
Muscle	A_000420	141	141	G	C	7	0.57
Ovary	A_000444	476	476	G	A	10	0.3
Ovary	A_000444	482	482	T	C	11	0.36
Ovary	A_000444	526	526	T	A	15	0.27
Ovary	A_000444	556	556	A	G	18	0.22
Ovary	A_000444	562	562	A	G	19	0.21
Ovary	A_000444	594	594	T	A	18	0.22
Ovary	A_000444	622	622	C	G	19	0.21
Ovary	A_000444	643	643	A	G	20	0.25
Ovary	A_000444	661	661	A	G	19	0.37
Ovary	A_000444	675	675	G	A	18	0.39
Ovary	A_000444	679	679	C	T	18	0.5
Ovary	A_000444	702	702	G	A	16	0.25
Ovary	A_000444	730	730	G	T	16	0.19
Ovary	A_000444	734	734	A	G	17	0.47
Ovary	A_000444	736	736	T	C	17	0.24
Ovary	A_000444	781	781	G	A	17	0.18
Ovary	A_000444	787	787	T	C	16	0.5
Ovary	A_000444	802	802	G	A	15	0.33
Ovary	A_000444	872	872	A	G	12	0.25
Ovary	A_000445	364	364	A	G	9	0.33
Ovary	A_000445	514	514	A	T	10	0.4
Ovary	A_000445	546	546	G	A	10	0.5
Ovary	A_000445	571	571	C	T	10	0.3
Ovary	A_000447	385	385	A	C	6	0.5
Muscle	A_000448	874	874	G	A	57	0.42
Muscle	A_000448	953	953	C	T	64	0.12
Muscle	A_000450	99	99	C	A	9	0.33
Muscle	A_000450	100	100	T	G	9	0.33
Ovary	A_000451	235	235	G	A	12	0.33
Ovary	A_000451	317	317	C	G	4	0.75
Ovary	A_000451	347	347	T	A	4	0.75
Ovary	A_000452	193	193	G	A	4	0.75
Ovary	A_000452	296	296	C	G	4	0.75
Ovary	A_000452	327	327	T	A	4	0.75
Ovary	A_000454	175	175	C	T	13	0.62
Ovary	A_000454	252	252	G	T	13	0.62
Ovary	A_000454	289	289	C	G	13	0.38
Ovary	A_000454	382	382	G	A	15	0.53
Ovary	A_000454	390	390	C	T	15	0.33
Ovary	A_000454	406	406	A	G	14	0.5
Muscle	A_000458	842	842	G	A	6	0.5
Ovary	A_000459	552	552	A	G	7	0.43
Testicle	A_000463	46	46	A	C	42	0.26
Testicle	A_000463	47	47	T	G	49	0.29
Testicle	A_000463	223	223	G	A	155	0.44
Testicle	A_000463	234	234	G	A	158	0.16
Testicle	A_000463	281	281	C	T	169	0.16
Testicle	A_000463	392	392	T	C	159	0.26
Testicle	A_000463	425	425	A	G	143	0.32
Testicle	A_000464	408	408	T	C	8	0.5
Testicle	A_000464	413	413	A	G	8	0.5
Testicle	A_000466	80	80	T	C	43	0.26
Testicle	A_000466	100	100	A	G	48	0.29
Testicle	A_000466	123	123	G	A	63	0.65
Testicle	A_000466	337	337	A	C	165	0.49
Testicle	A_000466	503	503	G	A	119	0.45
Testicle	A_000466	577	577	A	G	70	0.39
Testicle	A_000466	585	585	A	C	65	0.62
Testicle	A_000466	622	622	C	T	44	0.61
Testicle	A_000466	669	669	A	G	30	0.43
Ovary	A_000472	120	120	C	T	8	0.37
Ovary	A_000472	267	267	C	T	12	0.25
Muscle	A_000473	29	29	A	T	8	0.5
Muscle	A_000473	50	50	G	T	10	0.3
Muscle	A_000473	63	63	T	C	10	0.3
Muscle	A_000473	70	70	A	G	11	0.27
Muscle	A_000473	78	78	T	G	11	0.36
Muscle	A_000473	110	110	A	G	6	0.5
Ovary	A_000476	310	310	G	A	3	1
Ovary	A_000476	320	320	T	G	3	1
Ovary	A_000479	92	92	C	T	6	0.67
Ovary	A_000479	106	106	N	A	6	0.83
Ovary	A_000479	111	111	A	C	6	0.5
Ovary	A_000479	113	113	A	T	6	0.5
Ovary	A_000479	123	123	C	T	8	0.75
Ovary	A_000479	137	137	A	T	9	0.44
Ovary	A_000479	165	165	A	G	10	0.7
Ovary	A_000479	226	226	T	C	8	0.62
Ovary	A_000480	46	46	C	G	8	0.62
Ovary	A_000480	102	102	G	A	7	1
Ovary	A_000481	287	287	T	C	3	1
Ovary	A_000482	244	244	G	C	8	1
Muscle	A_000483	2728	2728	T	C	4	0.75
Muscle	A_000483	2923	2923	G	T	12	0.75
Muscle	A_000483	3121	3121	A	G	8	0.75
Muscle	A_000483	3166	3166	A	G	8	0.75
Ovary	A_000486	234	234	T	G	21	0.19
Ovary	A_000486	238	238	T	C	21	0.19
Ovary	A_000486	248	248	C	A	21	0.14
Ovary	A_000486	326	326	A	G	22	0.18
Ovary	A_000486	428	428	T	A	31	0.23
Ovary	A_000486	546	546	C	G	26	0.46
Ovary	A_000486	596	596	T	C	24	0.46
Ovary	A_000486	604	604	A	C	24	0.37
Ovary	A_000486	608	608	T	C	23	0.3
Ovary	A_000486	614	614	G	A	23	0.35
Ovary	A_000486	617	617	T	G	21	0.38
Ovary	A_000486	684	684	A	T	17	0.18
Ovary	A_000486	686	686	A	T	17	0.41
Ovary	A_000486	711	711	G	T	16	0.37
Ovary	A_000486	728	728	A	G	14	0.5
Ovary	A_000486	877	877	T	C	3	1
Ovary	A_000487	380	380	T	C	12	0.25
Ovary	A_000487	591	591	T	G	26	0.23
Ovary	A_000487	624	624	G	T	26	0.77
Ovary	A_000487	641	641	A	G	24	0.25
Ovary	A_000487	696	696	A	T	20	0.3
Ovary	A_000487	790	790	T	C	7	0.43
Ovary	A_000491	318	318	A	G	11	0.55
Ovary	A_000491	403	403	C	T	5	0.6
Ovary	A_000492	719	719	C	T	35	0.14
Ovary	A_000492	765	765	T	C	41	0.17
Ovary	A_000492	1047	1047	C	T	57	0.12
Ovary	A_000492	1059	1059	A	G	58	0.22
Ovary	A_000492	1064	1064	T	C	58	0.21
Ovary	A_000492	1093	1093	G	A	58	0.22
Ovary	A_000492	1100	1100	G	T	57	0.23
Ovary	A_000492	1148	1148	T	A	50	0.2
Ovary	A_000493	1074	1074	C	T	7	0.57
Ovary	A_000493	1110	1110	T	A	6	0.83
Ovary	A_000511	549	549	C	T	13	0.38
Ovary	A_000521	2468	2468	A	G	12	0.33
Ovary	A_000521	3449	3449	C	T	18	0.28
Ovary	A_000521	4863	4863	A	G	18	0.17
Ovary	A_000521	4937	4937	A	G	18	0.17
Ovary	A_000522	2727	2727	T	C	16	0.56
Ovary	A_000529	56	56	A	G	26	0.23
Ovary	A_000529	92	92	G	T	33	0.33
Ovary	A_000529	632	632	T	A	5	0.6
Ovary	A_000545	268	268	G	A	7	0.43
Ovary	A_000545	383	383	T	A	8	0.37
Ovary	A_000546	193	193	T	C	9	0.67
Ovary	A_000546	294	294	G	A	9	0.67
Ovary	A_000546	296	296	T	C	9	0.56
Ovary	A_000546	306	306	G	T	9	0.56
Ovary	A_000548	261	261	A	C	4	0.75
Testicle	A_000549	94	94	G	T	29	0.24
Testicle	A_000549	95	95	A	T	29	0.24
Testicle	A_000549	122	122	G	A	30	0.23
Testicle	A_000549	126	126	T	C	30	0.23
Testicle	A_000549	137	137	A	G	32	0.22
Testicle	A_000549	147	147	C	T	33	0.21
Testicle	A_000549	152	152	A	G	33	0.21
Testicle	A_000549	216	216	G	C	44	0.14
Testicle	A_000549	227	227	T	C	45	0.13
Testicle	A_000549	244	244	C	G	46	0.13
Testicle	A_000549	263	263	G	A	47	0.13
Testicle	A_000549	267	267	C	T	47	0.13
Testicle	A_000549	292	292	C	T	47	0.13
Testicle	A_000549	584	584	C	G	16	0.5
Testicle	A_000549	619	619	C	T	13	0.31
Testicle	A_000550	481	481	A	G	9	0.56
Testicle	A_000550	592	592	T	C	12	0.5
Testicle	A_000550	638	638	G	C	13	0.69
Ovary	A_000555	1775	1775	G	T	7	0.43
Ovary	A_000558	147	147	G	A	6	0.5
Ovary	A_000560	170	170	T	C	4	0.75
Ovary	A_000560	273	273	A	T	9	0.33
Ovary	A_000560	357	357	T	C	8	0.37
Ovary	A_000561	239	239	G	C	4	0.75
Ovary	A_000561	265	265	A	G	5	0.6
Ovary	A_000561	273	273	A	T	5	0.8
Ovary	A_000561	356	356	G	A	3	1
Ovary	A_000561	358	358	T	G	3	1
Testicle	A_000563	471	471	G	C	14	0.57
Testicle	A_000563	478	478	G	A	13	0.69
Ovary	A_000579	155	155	T	A	3	1
Ovary	A_000593	356	356	A	G	15	0.4
Ovary	A_000593	556	556	T	A	15	0.2
Ovary	A_000594	478	478	A	T	5	0.8
Muscle	A_000637	4287	4287	C	A	10	0.3
Muscle	A_000637	4444	4444	G	A	14	0.29
Ovary	A_000640	3293	3293	G	A	10	0.3
Ovary	A_000640	3343	3343	T	A	14	0.29
Ovary	A_000640	3468	3468	A	G	18	0.17
Ovary	A_000640	4087	4087	C	T	18	0.33
Ovary	A_000640	4138	4138	T	G	16	0.31
Ovary	A_000641	2847	2847	A	G	11	0.27
Ovary	A_000641	2981	2981	T	C	11	0.36
Ovary	A_000641	3028	3028	G	T	7	0.57
Muscle	A_000643	3433	3433	A	G	13	0.38
Muscle	A_000643	3787	3787	G	A	9	0.56
Muscle	A_000643	4876	4876	G	A	8	0.37
Muscle	A_000644	269	269	C	T	6	0.67
Ovary	A_000652	1255	1255	C	T	3	1
Ovary	A_000652	1474	1474	T	C	51	0.27
Ovary	A_000652	1507	1507	A	G	57	0.26
Ovary	A_000652	1564	1564	T	A	70	0.13
Ovary	A_000652	1714	1714	C	T	50	0.36
Ovary	A_000652	1763	1763	A	G	43	0.12
Ovary	A_000652	1772	1772	G	C	40	0.1
Testicle	A_000660	243	243	G	A	8	0.5
Testicle	A_000660	309	309	C	T	7	0.57
Testicle	A_000660	323	323	G	A	7	0.71
Testicle	A_000660	343	343	A	G	7	0.57
Ovary	A_000661	955	955	A	G	12	0.42
Ovary	A_000661	1096	1096	C	T	7	0.43
Ovary	A_000662	102	102	C	A	5	0.6
Ovary	A_000662	272	272	A	T	5	0.8
Ovary	A_000663	600	600	G	A	13	0.62
Ovary	A_000663	783	783	T	G	9	0.56
Ovary	A_000663	918	918	C	A	9	0.44
Ovary	A_000663	927	927	C	T	9	0.33
Ovary	A_000663	949	949	A	G	8	0.37
Ovary	A_000663	1017	1017	A	G	7	0.43
Ovary	A_000663	1042	1042	T	C	7	0.43
Ovary	A_000664	1198	1198	A	G	61	0.11
Ovary	A_000664	1234	1234	C	T	86	0.12
Ovary	A_000664	1473	1473	T	C	111	0.23
Ovary	A_000664	1500	1500	A	G	110	0.27
Ovary	A_000664	1507	1507	A	G	110	0.44
Ovary	A_000664	1516	1516	A	G	110	0.14
Ovary	A_000664	1696	1696	C	T	30	0.17
Ovary	A_000664	1702	1702	A	C	27	0.15
Ovary	A_000670	204	204	G	A	9	0.33
Ovary	A_000670	304	304	T	C	12	0.42
Ovary	A_000670	1225	1225	T	C	6	0.5
Ovary	A_000670	1236	1236	T	G	6	0.5
Muscle	A_000673	1068	1068	G	C	3	1
Muscle	A_000673	1685	1685	T	C	6	0.67
Muscle	A_000673	1686	1686	G	A	6	0.67
Testicle	A_000674	1067	1067	C	G	4	1
Ovary	A_000679	1284	1284	G	A	4	0.75
Ovary	A_000679	1356	1356	G	T	7	0.43
Ovary	A_000679	1377	1377	A	G	7	0.43
Ovary	A_000682	1041	1041	C	T	3	1
Ovary	A_000684	617	617	A	G	4	0.75
Ovary	A_000684	628	628	C	T	4	0.75
Ovary	A_000685	87	87	C	T	9	0.44
Ovary	A_000685	91	91	T	C	9	0.44
Ovary	A_000685	99	99	A	C	9	0.44
Ovary	A_000685	143	143	A	C	17	0.53
Ovary	A_000685	147	147	A	C	17	0.24
Ovary	A_000685	177	177	T	C	17	0.24
Ovary	A_000685	180	180	A	C	17	0.24
Ovary	A_000685	216	216	C	G	19	0.16
Ovary	A_000685	299	299	C	G	21	0.24
Ovary	A_000685	302	302	A	G	21	0.24
Ovary	A_000685	311	311	A	G	22	0.23
Ovary	A_000685	359	359	G	C	23	0.3
Ovary	A_000685	441	441	T	A	29	0.17
Ovary	A_000685	473	473	C	T	35	0.34
Ovary	A_000685	535	535	C	T	28	0.11
Ovary	A_000685	540	540	T	C	28	0.11
Ovary	A_000685	576	576	C	T	27	0.37
Ovary	A_000685	602	602	A	T	27	0.15
Ovary	A_000685	649	649	G	A	25	0.16
Ovary	A_000685	666	666	T	A	25	0.2
Ovary	A_000685	685	685	A	G	24	0.29
Ovary	A_000685	744	744	T	C	15	0.33
Ovary	A_000685	831	831	T	C	10	0.4
Ovary	A_000685	977	977	T	C	15	0.27
Ovary	A_000685	1033	1033	C	T	13	0.38
Ovary	A_000685	1046	1046	T	A	17	0.24
Ovary	A_000685	1051	1051	A	C	18	0.33
Ovary	A_000685	1078	1078	G	T	16	0.19
Ovary	A_000685	1081	1081	T	A	16	0.19
Ovary	A_000685	1153	1153	T	A	16	0.19
Ovary	A_000685	1178	1178	C	G	14	0.21
Ovary	A_000685	1197	1197	C	T	13	0.31
Ovary	A_000685	1239	1239	T	C	11	0.27
Ovary	A_000685	1252	1252	T	G	12	0.25
Ovary	A_000685	1279	1279	T	C	13	0.38
Ovary	A_000685	1319	1319	A	G	16	0.25
Ovary	A_000685	1407	1407	C	G	12	0.25
Ovary	A_000685	1441	1441	T	C	12	0.42
Ovary	A_000685	1499	1499	C	T	17	0.24
Ovary	A_000685	1530	1530	G	C	18	0.17
Ovary	A_000685	1594	1594	C	T	19	0.16
Ovary	A_000685	1597	1597	A	G	19	0.26
Ovary	A_000685	1599	1599	T	A	18	0.5
Ovary	A_000685	1602	1602	C	G	16	0.19
Ovary	A_000685	1644	1644	A	C	14	0.21
Ovary	A_000685	1679	1679	C	T	14	0.36
Ovary	A_000685	1745	1745	G	A	14	0.21
Ovary	A_000685	1893	1893	A	G	8	0.37
Ovary	A_000685	2087	2087	G	C	11	0.36
Ovary	A_000685	2122	2122	G	A	14	0.29
Ovary	A_000685	2148	2148	T	A	15	0.33
Ovary	A_000685	2163	2163	T	C	16	0.44
Ovary	A_000685	2169	2169	C	T	16	0.37
Ovary	A_000685	2171	2171	A	T	16	0.37
Ovary	A_000685	2177	2177	C	A	18	0.28
Ovary	A_000685	2198	2198	C	T	18	0.22
Ovary	A_000685	2201	2201	T	A	18	0.28
Ovary	A_000685	2248	2248	T	A	24	0.37
Ovary	A_000685	2321	2321	T	C	25	0.12
Ovary	A_000685	2323	2323	T	A	23	0.13
Ovary	A_000685	2344	2344	C	T	20	0.25
Ovary	A_000685	2355	2355	C	T	19	0.21
Ovary	A_000685	2383	2383	G	T	22	0.36
Ovary	A_000685	2452	2452	T	C	22	0.32
Ovary	A_000685	2486	2486	T	A	17	0.41
Ovary	A_000685	2514	2514	A	C	12	0.33
Ovary	A_000685	2523	2523	C	T	12	0.33
Ovary	A_000685	2556	2556	T	C	9	0.44
Ovary	A_000685	2567	2567	T	C	9	0.67
Ovary	A_000685	2684	2684	T	C	5	0.8
Ovary	A_000685	2694	2694	A	G	5	0.6
Ovary	A_000685	2696	2696	A	G	5	0.6
Ovary	A_000686	184	184	A	T	10	0.8
Ovary	A_000686	247	247	A	T	14	0.93
Ovary	A_000686	269	269	T	C	15	0.4
Ovary	A_000686	272	272	T	C	16	0.37
Ovary	A_000686	276	276	T	G	16	0.31
Ovary	A_000686	328	328	C	T	20	0.2
Ovary	A_000686	347	347	G	T	20	0.4
Ovary	A_000686	364	364	C	T	21	0.19
Ovary	A_000686	381	381	T	C	20	0.3
Ovary	A_000686	391	391	A	G	22	0.14
Ovary	A_000686	393	393	A	G	22	0.14
Ovary	A_000686	417	417	G	C	22	0.5
Ovary	A_000686	435	435	T	C	21	0.67
Ovary	A_000686	452	452	A	G	21	0.14
Ovary	A_000686	457	457	T	C	20	0.45
Ovary	A_000686	464	464	A	G	20	0.25
Ovary	A_000686	470	470	A	G	20	0.45
Ovary	A_000686	481	481	T	C	20	0.4
Ovary	A_000686	501	501	C	T	19	0.47
Ovary	A_000687	194	194	A	G	5	0.6
Ovary	A_000687	198	198	A	C	5	0.6
Ovary	A_000687	229	229	C	A	6	0.67
Ovary	A_000687	256	256	T	A	7	0.43
Ovary	A_000688	420	420	G	A	14	0.5
Ovary	A_000688	468	468	A	G	15	0.53
Ovary	A_000688	469	469	T	C	15	0.33
Ovary	A_000691	669	669	A	G	8	0.37
Ovary	A_000691	682	682	A	C	9	0.33
Ovary	A_000691	763	763	T	C	10	0.4
Ovary	A_000691	814	814	T	C	8	0.37
Ovary	A_000691	820	820	T	C	8	0.5
Ovary	A_000691	824	824	T	A	8	0.37
Ovary	A_000691	827	827	G	T	8	0.37
Ovary	A_000691	855	855	T	G	7	0.43
Ovary	A_000692	31	31	G	A	8	0.5
Ovary	A_000692	50	50	A	G	8	0.37
Ovary	A_000692	57	57	G	A	8	0.37
Ovary	A_000692	76	76	T	C	8	0.37
Ovary	A_000693	11	11	G	T	9	0.67
Ovary	A_000693	18	18	A	G	9	0.44
Ovary	A_000693	40	40	C	G	9	0.67
Ovary	A_000693	68	68	G	A	9	0.33
Ovary	A_000697	193	193	T	C	4	0.75
Ovary	A_000697	198	198	T	G	4	0.75
Ovary	A_000697	215	215	G	T	4	0.75
Ovary	A_000697	219	219	G	A	4	0.75
Ovary	A_000697	226	226	T	G	4	0.75
Ovary	A_000697	231	231	A	T	4	0.75
Ovary	A_000697	238	238	G	T	4	0.75
Ovary	A_000700	581	581	T	C	10	0.3
Ovary	A_000700	583	583	A	G	10	0.3
Ovary	A_000703	419	419	A	G	9	0.56
Ovary	A_000703	425	425	A	G	9	0.56
Ovary	A_000703	428	428	C	A	9	0.56
Ovary	A_000703	527	527	A	G	7	0.43
Ovary	A_000704	119	119	A	G	8	0.5
Ovary	A_000704	135	135	G	A	8	0.5
Ovary	A_000704	214	214	C	A	10	0.4
Ovary	A_000704	235	235	T	C	10	0.4
Ovary	A_000704	245	245	G	T	9	0.44
Ovary	A_000704	282	282	T	C	10	0.4
Ovary	A_000704	322	322	T	C	10	0.8
Ovary	A_000709	601	601	A	T	12	0.33
Ovary	A_000709	651	651	G	A	10	0.3
Ovary	A_000709	734	734	C	T	11	0.64
Ovary	A_000709	761	761	C	A	11	0.55
Ovary	A_000709	792	792	G	C	10	0.5
Ovary	A_000712	182	182	G	C	12	0.25
Ovary	A_000712	188	188	C	T	12	0.33
Ovary	A_000712	266	266	C	T	9	0.44
Ovary	A_000719	136	136	A	G	9	0.78
Ovary	A_000719	156	156	T	C	10	0.5
Ovary	A_000719	164	164	G	A	10	0.3
Ovary	A_000719	175	175	G	T	9	0.44
Ovary	A_000719	198	198	C	T	7	0.71
Ovary	A_000719	223	223	A	C	9	0.33
Ovary	A_000719	227	227	C	T	9	0.33
Ovary	A_000719	229	229	G	A	9	0.44
Ovary	A_000719	299	299	C	A	8	0.5
Ovary	A_000719	310	310	C	T	7	0.71
Ovary	A_000719	353	353	A	T	9	0.44
Ovary	A_000719	515	515	T	C	4	1
Ovary	A_000720	92	92	A	G	7	0.43
Ovary	A_000720	279	279	C	T	9	0.33
Ovary	A_000720	339	339	T	A	8	0.5
Ovary	A_000720	397	397	A	C	6	0.5
Ovary	A_000729	196	196	C	G	6	0.67
Ovary	A_000729	247	247	T	A	9	0.44
Ovary	A_000730	272	272	C	G	18	0.22
Ovary	A_000730	302	302	A	G	18	0.28
Ovary	A_000730	304	304	C	T	17	0.24
Ovary	A_000730	322	322	C	T	16	0.31
Ovary	A_000730	337	337	A	G	16	0.19
Ovary	A_000730	346	346	C	T	16	0.25
Ovary	A_000730	359	359	C	G	16	0.31
Ovary	A_000730	382	382	A	T	13	0.54
Ovary	A_000730	411	411	C	T	12	0.25
Ovary	A_000735	130	130	G	A	7	0.71
Ovary	A_000735	170	170	C	G	8	0.62
Ovary	A_000735	451	451	A	G	6	0.5
Ovary	A_000737	170	170	C	G	9	0.56
Ovary	A_000737	306	306	G	A	9	0.44
Ovary	A_000737	380	380	A	G	9	0.44
Muscle	A_000741	487	487	T	C	6	0.5
Ovary	A_000744	259	259	G	A	6	0.5
Ovary	A_000746	298	298	A	G	6	0.67
Ovary	A_000746	312	312	G	A	6	0.67
Ovary	A_000746	314	314	T	C	6	0.67
Ovary	A_000746	382	382	C	G	4	0.75
Testicle	A_000775	497	497	A	G	8	0.5
Testicle	A_000782	273	273	G	A	4	1
Testicle	A_000782	275	275	T	C	4	0.75
Testicle	A_000782	284	284	A	C	4	1
Ovary	A_000792	1591	1591	C	T	86	0.15
Ovary	A_000792	1779	1779	G	T	211	0.13
Ovary	A_000792	1792	1792	A	T	214	0.17
Ovary	A_000792	1816	1816	T	A	219	0.12
Ovary	A_000792	1828	1828	A	T	222	0.12
Ovary	A_000792	1859	1859	C	T	216	0.2
Ovary	A_000792	1891	1891	A	G	203	0.47
Ovary	A_000792	1900	1900	G	A	198	0.12
Ovary	A_000792	2035	2035	C	T	126	0.23
Ovary	A_000792	2062	2062	C	T	116	0.22
Ovary	A_000792	2189	2189	A	C	46	0.11
Ovary	A_000792	2199	2199	C	A	37	0.14
Ovary	A_000792	2206	2206	G	T	30	0.13
Testicle	A_000795	961	961	A	G	29	0.38
Testicle	A_000795	1123	1123	A	T	15	0.47
Testicle	A_000795	1127	1127	A	G	15	0.33
Testicle	A_000795	1165	1165	T	C	9	0.33
Muscle	A_000801	543	543	G	A	7	0.43
Muscle	A_000807	53	53	A	C	48	0.52
Muscle	A_000807	74	74	T	C	70	0.54
Muscle	A_000807	116	116	G	T	91	0.6
Muscle	A_000807	169	169	A	C	118	0.6
Muscle	A_000807	237	237	A	G	149	0.64
Muscle	A_000807	251	251	G	A	145	0.49
Muscle	A_000807	272	272	C	T	141	0.21
Muscle	A_000807	287	287	T	C	140	0.66
Muscle	A_000807	290	290	C	T	140	0.65
Muscle	A_000807	300	300	G	A	139	0.66
Muscle	A_000807	311	311	T	C	135	0.67
Muscle	A_000807	314	314	A	C	135	0.67
Muscle	A_000807	326	326	A	G	133	0.68
Muscle	A_000807	347	347	A	G	130	0.68
Muscle	A_000807	353	353	A	T	126	0.55
Muscle	A_000807	407	407	C	T	94	0.82
Muscle	A_000807	437	437	T	C	77	0.81
Muscle	A_000807	449	449	G	C	65	0.78
Muscle	A_000807	491	491	C	T	50	0.72
Muscle	A_000807	494	494	T	A	49	0.78
Muscle	A_000807	530	530	C	T	34	0.71
Muscle	A_000807	539	539	C	T	32	0.72
Muscle	A_000807	542	542	C	G	31	0.74
Muscle	A_000807	551	551	T	C	22	0.55
Muscle	A_000807	599	599	T	C	9	0.44
Muscle	A_000807	607	607	A	G	8	0.37
Ovary	A_000827	543	543	A	G	9	1
Testicle	A_000827	543	543	A	G	3	1
Testicle	A_000828	285	285	A	T	3	1
Testicle	A_000828	509	509	C	A	28	0.18
Ovary	A_000828	671	671	T	A	27	0.26
Testicle	A_000828	671	671	T	A	26	0.19
Ovary	A_000830	341	341	A	G	10	0.7
Ovary	A_000830	448	448	G	T	4	0.75
Ovary	A_000832	217	217	T	G	16	0.5
Muscle	A_000835	201	201	G	A	15	0.2
Ovary	A_000835	210	210	G	A	13	0.23
Ovary	A_000835	212	212	A	G	15	0.27
Testicle	A_000835	217	217	A	G	15	0.27
Muscle	A_000835	221	221	G	A	17	0.18
Ovary	A_000835	260	260	G	C	12	0.25
Ovary	A_000835	276	276	T	A	12	0.25
Testicle	A_000835	293	293	G	A	12	0.67
Ovary	A_000835	305	305	G	C	10	0.3
Ovary	A_000837	171	171	T	C	8	0.62
Ovary	A_000837	184	184	G	A	9	0.56
Ovary	A_000837	189	189	A	G	9	0.56
Ovary	A_000837	203	203	C	G	9	0.56
Ovary	A_000837	251	251	G	A	11	0.27
Ovary	A_000837	315	315	T	G	10	0.4
Ovary	A_000837	319	319	C	G	10	0.7
Ovary	A_000845	311	311	C	T	14	0.21
Ovary	A_000846	149	149	G	A	7	0.57
Ovary	A_000846	183	183	A	T	8	0.5
Ovary	A_000846	247	247	T	C	10	0.3
Ovary	A_000846	258	258	C	A	10	0.5
Ovary	A_000846	317	317	A	T	10	0.3
Ovary	A_000846	332	332	C	T	10	0.3
Ovary	A_000846	335	335	A	T	11	0.36
Ovary	A_000846	347	347	G	A	11	0.27
Ovary	A_000846	351	351	T	C	11	0.36
Ovary	A_000846	374	374	T	A	9	0.78
Ovary	A_000846	381	381	T	A	9	0.44
Ovary	A_000846	395	395	T	C	10	0.3
Ovary	A_000846	417	417	G	A	9	0.33
Ovary	A_000846	431	431	C	G	8	0.37
Ovary	A_000846	527	527	T	C	7	0.43
Ovary	A_000847	232	232	A	G	4	0.75
Ovary	A_000847	269	269	G	A	7	0.71
Ovary	A_000847	321	321	C	T	9	0.56
Ovary	A_000847	334	334	C	A	9	0.33
Ovary	A_000847	395	395	A	T	7	0.43
Ovary	A_000868	231	231	T	A	5	0.8
Ovary	A_000868	266	266	T	C	5	0.6
Muscle	A_000872	861	861	A	T	9	0.33
Ovary	A_000876	494	494	C	T	4	0.75
Ovary	A_000876	563	563	T	C	3	1
Ovary	A_000876	569	569	T	C	3	1
Muscle	A_000878	933	933	A	G	3	1
Muscle	A_000878	1261	1261	G	A	25	0.16
Muscle	A_000878	1324	1324	C	T	27	0.15
Muscle	A_000878	1351	1351	A	G	29	0.52
Muscle	A_000878	1396	1396	C	T	30	0.23
Muscle	A_000878	1417	1417	C	T	32	0.22
Muscle	A_000878	1441	1441	A	C	32	0.22
Ovary	A_000884	556	556	A	G	17	0.59
Ovary	A_000884	572	572	A	G	19	0.63
Ovary	A_000884	589	589	A	G	23	0.7
Ovary	A_000884	617	617	G	A	28	0.14
Ovary	A_000884	656	656	T	C	32	0.28
Ovary	A_000884	662	662	T	C	32	0.22
Ovary	A_000884	674	674	A	C	32	0.12
Ovary	A_000884	712	712	T	C	28	0.21
Ovary	A_000884	722	722	G	A	29	0.21
Ovary	A_000884	730	730	T	C	28	0.29
Ovary	A_000884	736	736	C	A	30	0.1
Ovary	A_000884	743	743	C	G	30	0.1
Ovary	A_000884	814	814	C	G	30	0.17
Ovary	A_000884	817	817	C	T	30	0.13
Ovary	A_000884	896	896	C	A	25	0.4
Ovary	A_000884	942	942	G	C	23	0.22
Ovary	A_000885	589	589	A	G	17	0.18
Ovary	A_000885	898	898	A	C	8	1
Ovary	A_000890	938	938	A	G	11	0.45
Ovary	A_000890	1152	1152	A	C	11	0.45
Muscle	A_000892	404	404	T	A	5	1
Muscle	A_000892	485	485	C	T	6	0.5
Muscle	A_000892	737	737	C	G	4	0.75
Ovary	A_000902	514	514	A	T	13	0.23
Ovary	A_000902	516	516	A	T	13	0.23
Ovary	A_000902	517	517	G	C	13	0.38
Ovary	A_000902	739	739	C	T	12	0.42
Ovary	A_000902	1372	1372	A	T	22	0.23
Ovary	A_000902	1504	1504	C	T	13	0.31
Ovary	A_000902	1823	1823	A	C	15	0.27
Ovary	A_000902	1838	1838	C	A	15	0.2
Ovary	A_000902	2069	2069	T	A	15	0.67
Ovary	A_000902	2071	2071	G	A	15	0.2
Ovary	A_000902	2083	2083	C	A	15	0.53
Ovary	A_000902	2093	2093	A	T	15	0.27
Ovary	A_000902	2096	2096	T	A	15	0.27
Ovary	A_000902	2107	2107	A	C	15	0.2
Ovary	A_000902	2126	2126	T	C	19	0.32
Ovary	A_000902	2144	2144	T	G	21	0.48
Ovary	A_000902	2150	2150	T	C	22	0.55
Ovary	A_000902	2168	2168	T	G	20	0.75
Ovary	A_000902	2174	2174	T	C	22	0.82
Ovary	A_000902	2210	2210	G	A	18	0.5
Ovary	A_000903	364	364	T	C	29	0.31
Ovary	A_000903	435	435	A	G	28	0.43
Ovary	A_000903	536	536	C	A	24	0.42
Ovary	A_000903	546	546	G	C	23	0.61
Ovary	A_000903	548	548	C	T	23	0.57
Ovary	A_000903	690	690	T	G	11	0.55
Ovary	A_000903	825	825	A	G	4	0.75
Ovary	A_000907	721	721	C	T	33	0.3
Ovary	A_000908	335	335	T	G	20	1
Ovary	A_000908	860	860	G	A	5	0.6
Muscle	A_000911	214	214	C	T	9	0.44
Muscle	A_000911	292	292	A	G	14	0.21
Muscle	A_000911	407	407	T	A	20	0.45
Muscle	A_000911	476	476	A	G	21	0.19
Muscle	A_000911	832	832	T	C	24	0.33
Muscle	A_000911	841	841	A	G	24	0.33
Muscle	A_000911	844	844	A	G	24	0.33
Muscle	A_000911	933	933	T	C	28	0.18
Muscle	A_000911	946	946	G	T	27	0.37
Muscle	A_000911	1274	1274	G	A	9	0.33
Muscle	A_000911	1426	1426	G	T	19	0.37
Muscle	A_000911	1430	1430	G	T	19	0.21
Muscle	A_000911	1524	1524	C	T	9	0.44
Muscle	A_000911	1532	1532	T	C	9	0.44
Muscle	A_000911	1571	1571	G	A	16	0.37
Muscle	A_000911	1578	1578	C	T	23	0.22
Muscle	A_000911	1591	1591	A	T	28	0.36
Muscle	A_000911	1594	1594	C	T	29	0.59
Muscle	A_000911	1644	1644	G	A	20	0.45
Ovary	A_000914	457	457	G	T	4	0.75
Muscle	A_000917	396	396	T	C	8	0.37
Muscle	A_000917	464	464	T	C	10	0.3
Muscle	A_000917	903	903	G	A	11	0.27
Muscle	A_000917	985	985	A	C	12	0.5
Muscle	A_000917	1007	1007	G	A	18	0.28
Muscle	A_000917	1013	1013	T	C	18	0.22
Muscle	A_000917	1029	1029	A	G	21	0.19
Muscle	A_000917	1036	1036	G	T	21	0.29
Muscle	A_000917	1043	1043	G	A	23	0.43
Muscle	A_000917	1075	1075	G	C	27	0.48
Muscle	A_000917	1079	1079	A	G	26	0.15
Muscle	A_000917	1101	1101	C	G	24	0.5
Muscle	A_000917	1129	1129	C	T	24	0.25
Muscle	A_000917	1133	1133	C	A	24	0.25
Muscle	A_000917	1201	1201	C	T	9	0.33
Ovary	A_000927	246	246	A	T	13	0.31
Ovary	A_000927	256	256	G	A	13	0.46
Ovary	A_000927	264	264	C	T	14	0.21
Ovary	A_000927	267	267	T	C	14	0.29
Ovary	A_000927	283	283	T	A	14	0.29
Muscle	A_000931	323	323	C	T	103	0.33
Ovary	A_000931	323	323	C	T	96	0.27
Testicle	A_000931	323	323	C	T	81	0.27
Muscle	A_000932	288	288	C	T	21	0.33
Ovary	A_000932	288	288	C	T	25	0.32
Testicle	A_000932	288	288	C	T	12	0.25
Ovary	A_000942	82	82	C	T	9	0.44
Ovary	A_000942	584	584	G	A	11	0.27
Ovary	A_000942	655	655	G	C	9	0.44
Ovary	A_000948	204	204	A	G	8	0.37
Testicle	A_000949	130	130	C	T	14	0.29
Testicle	A_000949	300	300	T	A	20	0.4
Testicle	A_000949	345	345	A	G	19	0.37
Testicle	A_000949	427	427	T	C	16	0.19
Testicle	A_000949	485	485	C	G	21	0.52
Testicle	A_000949	516	516	T	C	21	0.43
Testicle	A_000949	542	542	A	T	22	0.41
Testicle	A_000949	610	610	A	G	23	0.35
Testicle	A_000949	620	620	A	G	25	0.36
Testicle	A_000949	721	721	A	G	24	0.12
Testicle	A_000949	779	779	A	T	19	0.37
Testicle	A_000949	788	788	G	A	18	0.39
Testicle	A_000949	796	796	G	C	17	0.18
Testicle	A_000949	825	825	A	G	9	0.78
Ovary	A_000950	489	489	T	A	8	0.37
Ovary	A_000951	113	113	G	T	6	0.67
Ovary	A_000951	161	161	C	T	7	0.43
Testicle	A_000953	27	27	G	A	8	0.37
Testicle	A_000953	82	82	T	C	10	0.8
Testicle	A_000953	84	84	A	T	10	0.3
Testicle	A_000953	114	114	C	T	11	0.36
Testicle	A_000953	142	142	T	C	11	0.64
Testicle	A_000953	158	158	G	A	10	0.3
Testicle	A_000953	199	199	C	T	11	0.27
Testicle	A_000953	202	202	C	T	11	0.27
Testicle	A_000953	204	204	T	A	11	0.55
Testicle	A_000953	214	214	A	C	6	0.67
Testicle	A_000953	247	247	C	A	6	0.5
Testicle	A_000953	256	256	T	C	5	0.6
Testicle	A_000953	259	259	G	C	5	0.6
Muscle	A_000962	7163	7163	G	T	16	0.19
Muscle	A_000964	6532	6532	A	T	7	0.43
Muscle	A_000964	6535	6535	T	C	7	0.43
Muscle	A_000964	6650	6650	A	T	7	0.43
Muscle	A_000964	6726	6726	A	G	9	0.44
Testicle	A_000964	6726	6726	A	G	14	0.43
Testicle	A_000964	6793	6793	T	C	18	0.17
Muscle	A_000964	7467	7467	G	A	3	1
Ovary	A_000968	1307	1307	A	G	13	0.54
Ovary	A_000968	1430	1430	C	T	9	0.33
Ovary	A_000968	1886	1886	C	T	7	0.43
Ovary	A_000968	2759	2759	C	T	14	0.29
Ovary	A_000968	3066	3066	A	G	14	0.36
Muscle	A_000970	307	307	G	T	19	0.16
Muscle	A_000970	563	563	T	A	25	0.28
Muscle	A_000970	1761	1761	C	A	12	0.5
Muscle	A_000970	1897	1897	A	T	22	0.18
Muscle	A_000970	1898	1898	C	T	22	0.18
Muscle	A_000970	1901	1901	C	A	22	0.18
Muscle	A_000970	1909	1909	G	C	22	0.18
Muscle	A_000970	1910	1910	T	A	22	0.18
Muscle	A_000970	2666	2666	G	T	31	0.13
Muscle	A_000972	99	99	A	G	15	0.27
Muscle	A_000973	99	99	A	G	6	0.5
Muscle	A_000974	2247	2247	T	C	12	0.33
Muscle	A_000974	2589	2589	A	G	15	0.47
Muscle	A_000974	3357	3357	T	G	14	0.29
Muscle	A_000980	860	860	T	C	10	0.3
Muscle	A_000980	1055	1055	T	A	15	0.33
Muscle	A_000980	2114	2114	C	T	17	0.35
Muscle	A_000980	2843	2843	C	T	19	0.37
Ovary	A_000984	2051	2051	T	C	6	0.5
Muscle	A_000992	2993	2993	G	T	8	0.37
Muscle	A_000992	3662	3662	A	C	9	0.33
Testicle	A_000998	1246	1246	T	C	8	0.5
Testicle	A_000998	1324	1324	G	A	8	0.5
Testicle	A_000998	1327	1327	C	T	8	0.5
Testicle	A_000998	2193	2193	T	C	16	0.19
Testicle	A_000998	2349	2349	G	A	16	0.56
Testicle	A_000998	2565	2565	T	C	5	0.6
Ovary	A_001004	1800	1800	A	G	5	0.6
Ovary	A_001006	1321	1321	G	A	6	0.5
Ovary	A_001006	1332	1332	G	A	6	0.5
Ovary	A_001006	1334	1334	G	A	6	0.5
Ovary	A_001006	1534	1534	G	A	10	0.5
Ovary	A_001006	1542	1542	G	A	11	0.27
Ovary	A_001006	1556	1556	G	A	12	0.25
Ovary	A_001006	1564	1564	G	A	12	0.5
Ovary	A_001006	1592	1592	A	G	13	0.38
Ovary	A_001006	1637	1637	A	G	10	0.4
Muscle	A_001014	428	428	A	G	54	0.28
Muscle	A_001014	1922	1922	T	A	48	0.15
Muscle	A_001014	3002	3002	G	T	49	0.2
Muscle	A_001014	3218	3218	A	C	50	0.26
Muscle	A_001014	3620	3620	A	G	32	0.22
Ovary	A_001019	745	745	A	C	3	1
Ovary	A_001019	750	750	G	T	3	1
Ovary	A_001019	759	759	G	T	3	1
Muscle	A_001023	1883	1883	T	C	117	0.33
Muscle	A_001028	583	583	C	T	23	0.3
Muscle	A_001028	907	907	G	A	16	0.19
Ovary	A_001032	320	320	G	A	16	0.19
Ovary	A_001032	1071	1071	T	C	31	0.19
Muscle	A_001037	319	319	T	A	20	0.9
Ovary	A_001046	861	861	A	G	6	0.5
Ovary	A_001046	1094	1094	T	G	6	0.5
Testicle	A_001050	1354	1354	T	A	7	0.43
Testicle	A_001051	899	899	T	G	5	0.6
Testicle	A_001051	920	920	C	T	5	0.6
Testicle	A_001051	1181	1181	C	G	5	0.6
Ovary	A_001052	1346	1346	G	T	6	0.5
Ovary	A_001052	1382	1382	A	G	14	0.36
Ovary	A_001052	1387	1387	A	G	14	0.29
Ovary	A_001052	1400	1400	A	G	16	0.25
Ovary	A_001052	1409	1409	A	G	16	0.25
Ovary	A_001052	1427	1427	A	G	17	0.41
Ovary	A_001052	1517	1517	G	A	26	0.31
Ovary	A_001052	1522	1522	G	A	26	0.5
Ovary	A_001052	1538	1538	C	T	28	0.11
Ovary	A_001052	1553	1553	G	A	30	0.37
Ovary	A_001052	1664	1664	T	C	35	0.2
Ovary	A_001052	1738	1738	A	G	35	0.26
Ovary	A_001052	1810	1810	C	A	26	0.31
Testicle	A_001064	413	413	T	C	4	0.75
Ovary	A_001064	1341	1341	A	T	4	1
Ovary	A_001067	1209	1209	T	C	3	1
Ovary	A_001072	108	108	A	G	14	0.29
Ovary	A_001072	316	316	T	C	17	0.41
Ovary	A_001072	433	433	A	G	11	0.36
Ovary	A_001072	820	820	A	G	20	0.4
Ovary	A_001072	935	935	G	A	25	0.2
Ovary	A_001072	1040	1040	G	A	21	0.43
Ovary	A_001074	338	338	C	G	18	0.22
Ovary	A_001080	424	424	T	C	4	1
Ovary	A_001081	152	152	A	G	15	0.47
Ovary	A_001081	194	194	G	C	17	0.41
Ovary	A_001081	252	252	T	C	15	0.4
Ovary	A_001081	297	297	G	T	14	0.21
Ovary	A_001081	322	322	T	C	14	0.43
Ovary	A_001084	1501	1501	T	C	13	0.23
Muscle	A_001088	1143	1143	C	T	37	0.57
Ovary	A_001088	1143	1143	C	T	12	0.58
Muscle	A_001088	1325	1325	T	A	31	0.39
Ovary	A_001088	1325	1325	T	A	10	0.4
Muscle	A_001088	1492	1492	T	C	23	0.48
Muscle	A_001092	1327	1327	T	C	102	0.39
Ovary	A_001092	1327	1327	T	C	75	0.23
Testicle	A_001092	1327	1327	T	C	64	0.48
Testicle	A_001092	1407	1407	C	G	64	1
Ovary	A_001094	364	364	A	G	7	0.43
Ovary	A_001094	368	368	G	A	7	0.43
Ovary	A_001104	223	223	T	C	4	0.75
Ovary	A_001136	398	398	A	T	20	0.2
Muscle	A_001136	797	797	T	G	6	0.5
Ovary	A_001136	797	797	T	G	21	0.43
Muscle	A_001136	800	800	A	G	6	0.5
Ovary	A_001136	800	800	A	G	22	0.41
Muscle	A_001136	830	830	C	T	7	0.57
Ovary	A_001136	830	830	C	T	22	0.41
Ovary	A_001136	1238	1238	A	G	15	0.33
Ovary	A_001136	1893	1893	A	T	12	0.33
Ovary	A_001146	661	661	A	C	6	0.5
Ovary	A_001148	968	968	A	G	6	0.5
Ovary	A_001152	1092	1092	G	A	7	0.43
Ovary	A_001152	1095	1095	G	A	7	0.43
Ovary	A_001156	424	424	T	C	11	0.36
Ovary	A_001160	659	659	C	T	10	0.4
Ovary	A_001160	884	884	C	T	6	0.5
Ovary	A_001168	813	813	G	A	12	0.5
Ovary	A_001168	867	867	G	A	14	0.29
Ovary	A_001168	1018	1018	T	C	12	0.33
Ovary	A_001168	1048	1048	T	A	13	0.23
Ovary	A_001168	1089	1089	G	A	8	0.37
Ovary	A_001168	1100	1100	A	G	8	0.37
Ovary	A_001168	1132	1132	G	A	8	0.5
Ovary	A_001174	689	689	T	A	8	0.37
Ovary	A_001174	1275	1275	C	T	14	0.21
Ovary	A_001174	1327	1327	A	G	14	0.21
Muscle	A_001176	1202	1202	T	C	9	0.44
Ovary	A_001178	215	215	C	T	10	0.3
Ovary	A_001180	862	862	T	A	9	0.56
Ovary	A_001184	11	11	T	C	4	0.75
Ovary	A_001184	27	27	G	C	5	0.8
Ovary	A_001184	114	114	G	T	8	0.62
Ovary	A_001184	184	184	A	G	9	0.33
Ovary	A_001184	350	350	T	C	7	0.43
Ovary	A_001184	476	476	C	G	6	0.5
Ovary	A_001184	489	489	A	C	7	0.57
Ovary	A_001184	495	495	G	A	7	0.57
Muscle	A_001188	765	765	G	A	16	0.44
Muscle	A_001204	71	71	A	C	4	0.75
Muscle	A_001204	112	112	G	A	4	0.75
Muscle	A_001204	169	169	C	T	4	0.75
Muscle	A_001204	216	216	C	T	4	0.75
Muscle	A_001204	245	245	G	A	4	0.75
Muscle	A_001204	293	293	A	G	4	0.75
Muscle	A_001204	317	317	A	C	4	0.75
Muscle	A_001204	905	905	A	G	10	0.3
Muscle	A_001204	1127	1127	G	A	11	0.36
Muscle	A_001206	20	20	G	T	3	1
Muscle	A_001206	26	26	G	T	3	1
Muscle	A_001206	27	27	C	A	3	1
Ovary	A_001212	913	913	C	T	6	0.67
Ovary	A_001213	481	481	T	G	12	0.42
Ovary	A_001213	509	509	T	C	17	0.18
Ovary	A_001213	531	531	A	C	17	0.41
Ovary	A_001213	566	566	C	G	22	0.18
Ovary	A_001213	580	580	A	G	23	0.17
Ovary	A_001213	657	657	C	T	26	0.31
Ovary	A_001213	844	844	C	T	16	0.31
Ovary	A_001213	848	848	A	T	16	0.37
Ovary	A_001213	887	887	C	T	17	0.59
Ovary	A_001213	899	899	T	C	15	0.6
Ovary	A_001213	900	900	G	A	14	0.5
Ovary	A_001213	922	922	A	G	13	0.23
Ovary	A_001222	414	414	A	T	22	0.5
Ovary	A_001222	1146	1146	C	T	24	0.12
Ovary	A_001234	823	823	T	C	3	1
Ovary	A_001238	524	524	T	C	23	0.3
Ovary	A_001238	547	547	T	C	24	0.17
Ovary	A_001238	573	573	A	C	26	0.46
Ovary	A_001238	582	582	A	G	28	0.14
Ovary	A_001238	629	629	G	C	28	0.18
Ovary	A_001238	682	682	C	G	26	0.42
Ovary	A_001243	619	619	G	A	4	0.75
Ovary	A_001244	261	261	C	T	5	0.6
Ovary	A_001252	703	703	T	C	3	1
Ovary	A_001254	444	444	A	T	8	0.62
Ovary	A_001254	448	448	T	C	8	0.75
Ovary	A_001256	652	652	T	C	22	0.32
Ovary	A_001256	666	666	T	C	22	0.23
Ovary	A_001256	761	761	A	G	29	0.17
Ovary	A_001257	652	652	T	C	16	0.19
Ovary	A_001257	666	666	T	C	16	0.19
Ovary	A_001257	697	697	C	G	18	0.61
Ovary	A_001262	41	41	C	T	9	0.56
Ovary	A_001262	297	297	G	A	36	0.25
Ovary	A_001262	330	330	C	T	43	0.28
Ovary	A_001262	369	369	G	A	48	0.48
Ovary	A_001262	465	465	C	A	45	0.2
Ovary	A_001262	501	501	T	C	42	0.14
Ovary	A_001262	645	645	T	C	44	0.23
Ovary	A_001262	813	813	G	A	15	0.53
Ovary	A_001262	897	897	G	A	4	0.75
Ovary	A_001264	714	714	A	G	7	0.43
Ovary	A_001266	287	287	C	T	10	0.4
Ovary	A_001266	312	312	G	T	9	0.33
Ovary	A_001266	340	340	A	G	11	0.27
Ovary	A_001266	406	406	T	C	12	0.5
Ovary	A_001266	761	761	A	G	5	0.8
Ovary	A_001266	770	770	T	G	5	0.6
Ovary	A_001266	780	780	T	G	5	1
Ovary	A_001266	798	798	G	T	5	0.6
Ovary	A_001266	808	808	T	C	5	0.8
Ovary	A_001268	422	422	T	A	15	0.4
Ovary	A_001268	455	455	T	G	16	0.25
Ovary	A_001268	476	476	C	T	17	0.29
Ovary	A_001268	574	574	T	C	16	0.37
Ovary	A_001268	643	643	A	T	16	0.44
Ovary	A_001268	677	677	C	G	15	0.27
Ovary	A_001268	712	712	C	A	14	0.21
Ovary	A_001268	778	778	A	T	19	0.47
Ovary	A_001268	817	817	A	T	14	0.5
Ovary	A_001268	861	861	A	G	13	0.23
Ovary	A_001278	503	503	C	G	7	0.43
Ovary	A_001278	698	698	T	C	9	0.44
Muscle	A_001291	160	160	C	T	15	0.27
Muscle	A_001291	187	187	T	C	15	0.27
Ovary	A_001312	221	221	A	G	7	0.43
Ovary	A_001312	434	434	G	A	14	0.29
Ovary	A_001312	530	530	C	G	11	0.27
Ovary	A_001324	293	293	G	A	11	0.36
Ovary	A_001324	297	297	G	A	12	0.33
Ovary	A_001328	112	112	A	T	11	0.55
Ovary	A_001328	187	187	A	T	10	0.4
Ovary	A_001328	195	195	T	C	10	0.4
Ovary	A_001328	210	210	G	A	10	0.6
Ovary	A_001328	238	238	C	T	8	0.5
Ovary	A_001328	266	266	G	C	7	0.43
Ovary	A_001328	270	270	A	C	7	0.43
Ovary	A_001328	305	305	T	C	8	0.5
Ovary	A_001328	311	311	G	A	8	0.37
Testicle	A_001332	143	143	C	T	4	1
Testicle	A_001332	145	145	G	A	4	1
Testicle	A_001332	150	150	A	G	4	1
Ovary	A_001336	396	396	G	A	12	0.25
Ovary	A_001336	401	401	A	T	12	0.42
Ovary	A_001336	466	466	T	C	13	0.31
Ovary	A_001336	612	612	G	A	14	0.29
Ovary	A_001336	631	631	T	C	14	0.43
Testicle	A_001338	383	383	G	A	6	0.5
Muscle	A_001338	470	470	T	C	15	0.67
Muscle	A_001338	473	473	T	C	15	0.33
Testicle	A_001338	473	473	T	C	8	0.62
Muscle	A_001338	515	515	A	C	15	0.27
Muscle	A_001338	644	644	T	A	9	0.44
Ovary	A_001364	621	621	A	G	8	0.5
Ovary	A_001364	654	654	T	C	8	0.37
Ovary	A_001364	714	714	T	C	7	0.43
Ovary	A_001366	310	310	G	T	6	0.5
Testicle	A_001370	430	430	C	T	9	0.44
Testicle	A_001370	516	516	C	T	17	0.47
Testicle	A_001370	518	518	T	G	16	0.44
Testicle	A_001370	531	531	T	C	16	0.37
Testicle	A_001370	630	630	A	G	16	0.25
Testicle	A_001370	648	648	A	G	16	0.44
Testicle	A_001370	709	709	A	G	17	0.24
Testicle	A_001370	714	714	A	G	16	0.19
Testicle	A_001370	748	748	G	A	15	0.2
Testicle	A_001370	757	757	C	T	15	0.33
Testicle	A_001371	35	35	C	T	3	1
Testicle	A_001371	142	142	C	T	11	0.36
Testicle	A_001371	210	210	T	C	10	0.4
Testicle	A_001371	235	235	T	C	12	0.25
Testicle	A_001371	242	242	A	G	13	0.31
Testicle	A_001371	249	249	T	C	12	0.25
Testicle	A_001371	259	259	G	A	12	0.75
Testicle	A_001371	265	265	A	G	12	0.25
Testicle	A_001371	274	274	G	T	11	0.36
Testicle	A_001371	278	278	C	T	10	0.3
Testicle	A_001371	290	290	G	A	8	0.87
Testicle	A_001371	295	295	T	C	8	0.87
Testicle	A_001371	300	300	T	A	8	0.75
Testicle	A_001371	310	310	G	A	8	0.87
Ovary	A_001377	129	129	C	T	5	0.6
Ovary	A_001377	246	246	G	A	4	0.75
Ovary	A_001377	260	260	G	A	4	0.75
Ovary	A_001377	341	341	T	C	3	1
Ovary	A_001393	266	266	C	T	12	0.33
Muscle	A_001396	362	362	C	T	8	0.37
Testicle	A_001396	513	513	G	A	8	0.37
Testicle	A_001396	568	568	G	A	8	0.62
Muscle	A_001396	589	589	C	T	6	0.5
Testicle	A_001396	589	589	C	T	6	0.67
Muscle	A_001396	625	625	A	G	4	0.75
Testicle	A_001396	625	625	A	G	6	0.5
Muscle	A_001396	711	711	T	C	8	0.37
Ovary	A_001396	1016	1016	A	G	6	0.5
Ovary	A_001396	1040	1040	G	T	5	0.8
Ovary	A_001397	39	39	G	A	5	0.6
Ovary	A_001397	116	116	G	A	4	0.75
Ovary	A_001397	148	148	A	G	4	1
Ovary	A_001397	161	161	G	A	4	0.75
Ovary	A_001397	169	169	C	A	3	1
Ovary	A_001397	172	172	G	T	3	1
Muscle	A_001397	181	181	C	A	3	1
Muscle	A_001397	200	200	G	A	4	0.75
Muscle	A_001397	203	203	G	T	4	0.75
Ovary	A_001397	203	203	G	T	3	1
Testicle	A_001414	429	429	T	G	4	0.75
Ovary	A_001421	361	361	T	G	4	0.75
Ovary	A_001424	350	350	C	G	10	0.7
Ovary	A_001424	352	352	C	A	10	0.7
Ovary	A_001424	363	363	G	C	10	0.5
Ovary	A_001424	386	386	G	A	10	0.5
Ovary	A_001424	395	395	A	C	11	0.73
Ovary	A_001424	417	417	T	C	13	0.69
Ovary	A_001424	447	447	C	T	13	0.69
Ovary	A_001424	465	465	G	C	13	0.62
Ovary	A_001424	481	481	G	A	12	0.25
Ovary	A_001424	483	483	T	C	12	0.33
Ovary	A_001424	507	507	G	T	14	0.64
Ovary	A_001424	517	517	C	G	14	0.64
Ovary	A_001424	529	529	A	G	13	0.69
Ovary	A_001424	548	548	T	C	14	0.29
Ovary	A_001424	556	556	T	C	14	0.5
Ovary	A_001424	559	559	A	C	14	0.21
Ovary	A_001425	254	254	A	G	9	0.33
Ovary	A_001425	360	360	A	T	18	0.28
Ovary	A_001425	363	363	T	A	17	0.18
Ovary	A_001425	380	380	G	A	17	0.29
Ovary	A_001425	387	387	C	T	17	0.53
Ovary	A_001425	395	395	G	C	16	0.31
Ovary	A_001425	427	427	C	A	13	0.38
Ovary	A_001425	443	443	T	C	12	0.25
Ovary	A_001425	480	480	T	C	12	0.5
Ovary	A_001425	500	500	G	T	12	0.25
Ovary	A_001428	88	88	C	T	5	0.6
Ovary	A_001428	235	235	C	T	8	0.37
Ovary	A_001428	294	294	C	T	14	0.29
Ovary	A_001428	308	308	G	A	14	0.43
Ovary	A_001428	372	372	A	G	15	0.33
Ovary	A_001428	380	380	A	T	15	0.47
Ovary	A_001428	382	382	C	T	15	0.6
Ovary	A_001428	420	420	G	A	14	0.36
Ovary	A_001428	436	436	C	T	16	0.37
Ovary	A_001428	442	442	G	A	16	0.31
Ovary	A_001428	468	468	A	T	23	0.35
Ovary	A_001428	486	486	C	T	21	0.48
Ovary	A_001428	558	558	G	A	12	0.5
Ovary	A_001428	584	584	A	G	11	0.64
Ovary	A_001428	585	585	C	T	11	0.64
Ovary	A_001428	589	589	T	C	11	0.45
Ovary	A_001428	615	615	T	C	10	0.8
Ovary	A_001428	616	616	A	G	10	0.7
Ovary	A_001429	51	51	C	T	6	0.67
Ovary	A_001429	67	67	A	G	6	0.67
Ovary	A_001429	101	101	G	A	13	0.31
Ovary	A_001429	105	105	G	A	13	0.31
Ovary	A_001429	110	110	T	C	13	0.69
Ovary	A_001429	116	116	G	A	13	0.54
Ovary	A_001429	122	122	A	G	14	0.29
Ovary	A_001429	140	140	G	A	17	0.53
Ovary	A_001429	145	145	C	T	17	0.18
Ovary	A_001429	150	150	G	A	18	0.5
Ovary	A_001429	163	163	C	T	19	0.68
Ovary	A_001429	169	169	A	G	20	0.35
Ovary	A_001429	171	171	C	G	20	0.25
Ovary	A_001429	172	172	G	A	20	0.3
Ovary	A_001429	184	184	T	C	18	0.28
Ovary	A_001429	190	190	C	T	18	0.28
Ovary	A_001429	215	215	A	G	18	0.33
Ovary	A_001429	308	308	A	G	13	0.31
Ovary	A_001429	351	351	C	G	19	0.37
Ovary	A_001429	380	380	C	T	16	0.44
Ovary	A_001429	381	381	A	G	16	0.5
Ovary	A_001429	390	390	T	C	15	0.27
Ovary	A_001429	423	423	G	C	15	0.4
Ovary	A_001429	479	479	A	G	11	0.27
Ovary	A_001429	513	513	A	T	10	0.4
Ovary	A_001429	515	515	A	T	9	0.44
Ovary	A_001429	523	523	G	T	5	0.8
Testicle	A_001446	582	582	G	A	225	0.13
Testicle	A_001446	607	607	A	G	230	0.21
Testicle	A_001446	610	610	T	G	229	0.21
Testicle	A_001446	618	618	C	G	315	0.15
Testicle	A_001446	623	623	G	C	307	0.41
Testicle	A_001446	624	624	G	A	303	0.31
Testicle	A_001446	634	634	G	A	298	0.32
Testicle	A_001446	637	637	A	T	300	0.31
Testicle	A_001446	670	670	G	A	205	0.2
Testicle	A_001446	682	682	A	G	186	0.52
Testicle	A_001446	688	688	C	T	166	0.55
Ovary	A_001455	189	189	T	C	5	0.6
Ovary	A_001455	247	247	C	T	7	0.43
Ovary	A_001455	249	249	C	A	8	0.5
Ovary	A_001455	272	272	A	T	9	0.56
Ovary	A_001455	301	301	A	T	12	0.5
Ovary	A_001455	315	315	A	C	12	0.58
Ovary	A_001455	401	401	A	C	16	0.44
Ovary	A_001455	440	440	C	T	13	0.69
Ovary	A_001455	504	504	A	C	11	0.82
Ovary	A_001455	526	526	A	C	9	0.56
Ovary	A_001458	645	645	A	G	8	0.37
Muscle	A_001466	672	672	T	C	7	0.43
Ovary	A_001468	46	46	A	T	8	0.87
Ovary	A_001468	51	51	C	G	8	0.87
Ovary	A_001468	72	72	G	C	9	0.33
Ovary	A_001468	182	182	A	G	9	0.44
Ovary	A_001468	322	322	T	C	4	1
Ovary	A_001468	385	385	G	C	4	1
Ovary	A_001468	395	395	T	C	4	0.75
Ovary	A_001469	132	132	T	G	7	0.43
Ovary	A_001478	104	104	G	A	3	1
Ovary	A_001478	111	111	A	G	3	1
Ovary	A_001478	114	114	A	T	3	1
Ovary	A_001478	165	165	C	A	3	1
Ovary	A_001478	168	168	C	A	3	1
Ovary	A_001478	186	186	G	T	3	1
Ovary	A_001478	198	198	T	C	3	1
Ovary	A_001479	138	138	G	A	3	1
Ovary	A_001479	165	165	A	C	3	1
Ovary	A_001479	186	186	T	G	3	1
Ovary	A_001479	198	198	C	T	3	1
Ovary	A_001486	543	543	A	C	3	1
Testicle	A_001490	587	587	C	T	5	1
Ovary	A_001494	152	152	C	T	3	1
Ovary	A_001494	167	167	T	A	4	1
Ovary	A_001494	292	292	A	G	6	0.67
Ovary	A_001494	405	405	G	A	10	0.3
Ovary	A_001494	459	459	T	G	11	0.55
Ovary	A_001494	519	519	C	T	10	0.3
Ovary	A_001494	569	569	C	A	9	0.33
Ovary	A_001495	405	405	G	A	6	0.5
Ovary	A_001516	381	381	G	A	7	0.57
Ovary	A_001516	564	564	A	T	6	0.67
Ovary	A_001520	542	542	A	G	4	0.75
Ovary	A_001520	635	635	T	G	4	0.75
Ovary	A_001522	268	268	T	G	9	0.33
Ovary	A_001522	379	379	A	G	10	0.3
Ovary	A_001523	192	192	T	A	3	1
Ovary	A_001543	153	153	G	A	7	0.43
Ovary	A_001543	273	273	G	C	10	0.3
Ovary	A_001561	329	329	T	A	9	0.56
Ovary	A_001568	287	287	C	T	4	0.75
Ovary	A_001568	434	434	T	G	6	0.5
Ovary	A_001568	593	593	T	C	4	0.75
Ovary	A_001572	27	27	T	C	4	0.75
Ovary	A_001572	113	113	G	T	7	0.43
Ovary	A_001572	135	135	T	A	7	0.43
Ovary	A_001572	171	171	A	T	7	0.43
Ovary	A_001572	239	239	T	G	7	0.43
Ovary	A_001572	298	298	G	A	7	0.43
Ovary	A_001572	313	313	G	A	6	0.83
Ovary	A_001573	70	70	T	G	8	0.37
Ovary	A_001573	73	73	T	G	8	0.37
Ovary	A_001573	88	88	A	G	9	0.33
Ovary	A_001573	185	185	G	A	7	0.43
Ovary	A_001573	197	197	C	T	7	0.43
Ovary	A_001573	261	261	T	C	5	0.6
Ovary	A_001573	262	262	G	C	5	0.6
Ovary	A_001573	283	283	T	C	5	0.6
Ovary	A_001573	312	312	A	G	5	0.6
Ovary	A_001576	220	220	G	A	7	0.71
Ovary	A_001576	389	389	T	C	5	0.6
Muscle	A_001581	402	402	A	T	6	0.5
Ovary	A_001592	485	485	G	A	4	0.75
Ovary	A_001594	304	304	G	C	5	0.6
Ovary	A_001594	455	455	C	G	5	0.6
Ovary	A_001596	190	190	A	G	7	0.71
Ovary	A_001596	201	201	G	C	7	0.43
Ovary	A_001598	287	287	T	A	4	0.75
Ovary	A_001604	34	34	T	C	4	1
Ovary	A_001604	56	56	T	C	4	1
Ovary	A_001605	59	59	T	G	4	0.75
Ovary	A_001605	68	68	G	A	4	0.75
Muscle	A_001607	335	335	A	G	5	0.6
Ovary	A_001616	273	273	G	T	8	0.37
Ovary	A_001617	129	129	T	A	4	0.75
Ovary	A_001617	397	397	G	A	7	0.43
Ovary	A_001617	415	415	T	C	6	0.5
Ovary	A_001622	317	317	T	C	5	0.6
Ovary	A_001622	328	328	T	C	6	0.5
Ovary	A_001622	338	338	C	T	6	1
Ovary	A_001622	346	346	A	G	6	1
Ovary	A_001622	396	396	G	T	6	1
Ovary	A_001622	443	443	A	G	6	0.83
Ovary	A_001622	480	480	C	T	7	0.71
Ovary	A_001622	483	483	G	A	7	0.43
Ovary	A_001622	539	539	T	G	6	0.5
Testicle	A_001630	210	210	C	T	5	0.6
Testicle	A_001630	246	246	G	A	9	0.33
Testicle	A_001630	277	277	T	C	10	0.4
Testicle	A_001630	340	340	C	T	7	0.43
Testicle	A_001631	175	175	C	A	4	0.75
Testicle	A_001631	230	230	G	A	4	0.75
Testicle	A_001631	326	326	G	A	5	0.6
Testicle	A_001631	379	379	G	C	5	0.6
Muscle	A_001648	405	405	G	A	3	1
Ovary	A_001651	144	144	A	G	4	0.75
Ovary	A_001658	316	316	T	C	8	0.37
Ovary	A_001658	429	429	G	A	5	0.6
Ovary	A_001678	160	160	C	T	7	0.43
Ovary	A_001678	164	164	T	C	7	0.43
Ovary	A_001678	233	233	T	C	10	0.6
Ovary	A_001678	241	241	A	C	10	0.4
Ovary	A_001678	270	270	T	C	10	0.5
Ovary	A_001678	274	274	A	G	10	0.5
Ovary	A_001678	282	282	T	A	10	0.3
Ovary	A_001678	285	285	A	G	10	0.3
Ovary	A_001678	303	303	G	A	10	0.4
Ovary	A_001678	311	311	G	C	10	0.3
Ovary	A_001678	351	351	C	A	11	0.55
Ovary	A_001678	389	389	A	G	8	0.37
Ovary	A_001678	421	421	C	T	7	0.43
Ovary	A_001678	422	422	A	G	7	0.57
Ovary	A_001678	423	423	T	C	7	0.43
Ovary	A_001679	117	117	T	A	3	1
Ovary	A_001679	201	201	T	C	3	1
Ovary	A_001679	239	239	G	T	3	1
Ovary	A_001694	154	154	A	C	5	0.6
Ovary	A_001694	206	206	T	C	5	0.6
Ovary	A_001694	237	237	A	G	6	0.67
Ovary	A_001694	282	282	A	G	6	0.67
Muscle	A_001694	563	563	T	A	4	0.75
Ovary	A_001711	106	106	C	T	3	1
Ovary	A_001711	114	114	T	G	3	1
Ovary	A_001711	117	117	A	G	3	1
Ovary	A_001711	145	145	T	G	3	1
Ovary	A_001711	159	159	T	A	3	1
Ovary	A_001718	66	66	T	G	7	0.57
Ovary	A_001718	112	112	C	T	5	0.6
Ovary	A_001718	209	209	A	T	6	0.5
Ovary	A_001718	389	389	C	T	4	0.75
Ovary	A_001738	278	278	G	A	4	0.75
Ovary	A_001738	289	289	A	C	4	0.75
Ovary	A_001738	292	292	G	A	4	1
Ovary	A_001738	305	305	G	A	4	1
Ovary	A_001738	315	315	T	C	4	1
Ovary	A_001744	296	296	A	G	7	0.43
Testicle	A_001754	276	276	G	T	8	0.5
Ovary	A_001766	205	205	A	G	12	0.42
Muscle	A_001767	195	195	A	G	11	0.55
Testicle	A_001791	153	153	T	C	6	0.83
Ovary	A_001800	200	200	T	C	5	0.6
Ovary	A_001806	52	52	G	A	4	1
Ovary	A_001806	78	78	G	A	5	1
Ovary	A_001806	376	376	C	A	6	1
Ovary	A_001810	225	225	G	A	3	1
Ovary	A_001812	309	309	C	T	9	0.44
Muscle	A_001813	259	259	T	G	178	0.98
Ovary	A_001813	259	259	T	G	201	0.98
Testicle	A_001813	259	259	T	G	172	0.97
Muscle	A_001813	298	298	T	A	227	0.26
Ovary	A_001813	298	298	T	A	252	0.32
Testicle	A_001813	298	298	T	A	218	0.26
Testicle	A_001889	47	47	C	T	198	0.15
Ovary	A_001898	312	312	G	C	5	0.6
Muscle	A_001903	245	245	A	G	6	0.5
Ovary	A_001945	164	164	T	C	3	1
Testicle	A_001968	34	34	T	C	3	1
Testicle	A_001968	121	121	G	A	3	1
Ovary	A_001968	199	199	T	C	6	0.5
Ovary	A_001972	110	110	A	G	25	0.28
Ovary	A_001972	142	142	G	A	35	0.29
Ovary	A_001972	280	280	T	C	71	0.14
Ovary	A_001972	301	301	A	G	80	0.19
Ovary	A_001972	493	493	A	C	59	0.41
Ovary	A_001972	1119	1119	T	C	37	0.14
Ovary	A_001972	1179	1179	T	C	27	0.15
Ovary	A_001972	1567	1567	G	T	37	0.22
Ovary	A_001972	1808	1808	T	G	34	0.12
Ovary	A_001972	2048	2048	A	C	42	0.29
Ovary	A_001972	2092	2092	C	A	41	0.46
Ovary	A_001972	2626	2626	A	T	37	0.11
Ovary	A_001972	2845	2845	T	C	37	0.19
Ovary	A_001972	2883	2883	T	C	32	0.12
Ovary	A_001972	2989	2989	G	T	33	0.3
Ovary	A_001972	2990	2990	A	T	34	0.35
Ovary	A_001972	3012	3012	C	T	31	0.39
Ovary	A_001972	3139	3139	T	A	28	0.25
Ovary	A_001972	3243	3243	T	C	26	0.15
Ovary	A_001973	374	374	T	C	13	0.23
Ovary	A_001973	379	379	T	C	13	0.23
Ovary	A_001973	393	393	T	C	16	0.19
Ovary	A_001973	402	402	C	T	17	0.18
Ovary	A_001973	529	529	C	T	23	0.17
Ovary	A_001973	651	651	A	G	19	0.21
Ovary	A_001973	901	901	G	A	15	0.2
Ovary	A_001973	907	907	T	C	15	0.53
Ovary	A_001973	928	928	A	G	12	0.33
Ovary	A_001973	931	931	C	A	12	0.33
Ovary	A_001973	940	940	G	A	11	0.36
Muscle	A_001977	1291	1291	T	C	15	0.6
Muscle	A_001977	2336	2336	G	A	5	1
Muscle	A_001977	2540	2540	A	T	11	0.27
Ovary	A_002009	1341	1341	T	G	16	0.37
Ovary	A_002023	971	971	T	C	19	0.53
Testicle	A_002027	797	797	T	C	10	0.5
Ovary	A_002029	202	202	A	G	12	0.42
Ovary	A_002029	262	262	A	T	13	0.23
Ovary	A_002029	265	265	G	T	13	0.23
Ovary	A_002029	285	285	T	G	13	0.23
Ovary	A_002029	299	299	C	T	14	0.36
Ovary	A_002029	343	343	A	G	14	0.29
Ovary	A_002029	487	487	C	T	15	0.27
Ovary	A_002033	355	355	G	A	18	0.17
Ovary	A_002033	481	481	A	G	65	0.12
Ovary	A_002033	664	664	A	G	71	0.13
Ovary	A_002033	679	679	A	T	69	0.14
Ovary	A_002033	691	691	A	T	65	0.32
Ovary	A_002033	712	712	T	C	56	0.14
Ovary	A_002033	718	718	T	C	55	0.2
Ovary	A_002033	773	773	T	A	42	0.19
Ovary	A_002033	802	802	T	C	23	0.3
Ovary	A_002041	339	339	A	G	41	0.17
Ovary	A_002041	499	499	C	G	81	0.28
Ovary	A_002041	665	665	G	T	55	0.16
Ovary	A_002041	677	677	A	G	52	0.33
Ovary	A_002042	348	348	A	T	4	0.75
Ovary	A_002042	393	393	G	A	4	0.75
Ovary	A_002042	411	411	G	T	4	0.75
Muscle	A_002043	516	516	T	C	28	0.11
Muscle	A_002043	703	703	T	G	22	1
Ovary	A_002043	703	703	T	G	8	1
Testicle	A_002043	703	703	T	G	12	1
Ovary	A_002045	333	333	T	G	91	0.21
Ovary	A_002045	360	360	A	G	102	0.3
Ovary	A_002045	452	452	T	C	112	0.13
Ovary	A_002045	507	507	A	G	117	0.39
Ovary	A_002045	654	654	C	A	42	0.17
Ovary	A_002045	689	689	G	A	13	0.23
Ovary	A_002047	92	92	C	A	10	0.3
Ovary	A_002051	187	187	G	A	6	0.5
Testicle	A_002057	112	112	G	T	8	0.5
Testicle	A_002061	55	55	C	T	25	0.12
Testicle	A_002061	66	66	T	C	28	0.43
Testicle	A_002061	78	78	T	C	36	0.11
Testicle	A_002061	82	82	T	G	38	0.16
Testicle	A_002061	94	94	C	G	42	0.38
Testicle	A_002061	100	100	T	C	44	0.27
Testicle	A_002061	130	130	A	G	52	0.38
Testicle	A_002061	312	312	A	G	69	0.2
Testicle	A_002061	322	322	C	A	64	0.41
Testicle	A_002061	464	464	C	G	19	0.42
Testicle	A_002061	476	476	G	C	17	0.29
Muscle	A_002073	336	336	T	C	15	0.27
Muscle	A_002073	360	360	C	G	22	0.18
Muscle	A_002073	527	527	T	A	25	0.88
Muscle	A_002073	537	537	G	T	25	0.88
Muscle	A_002073	547	547	T	C	22	0.5
Muscle	A_002073	552	552	A	G	18	0.72
Muscle	A_002075	151	151	T	G	210	0.98
Ovary	A_002075	151	151	T	G	218	0.9
Testicle	A_002075	151	151	T	G	184	0.99
Muscle	A_002075	439	439	T	G	117	0.99
Ovary	A_002075	439	439	T	G	121	0.99
Testicle	A_002075	439	439	T	G	96	1
Muscle	A_002079	160	160	T	C	21	0.24
Ovary	A_002083	145	145	C	T	50	0.14
Ovary	A_002083	225	225	G	A	67	0.27
Ovary	A_002083	282	282	G	C	79	0.33
Ovary	A_002083	357	357	G	A	88	0.15
Ovary	A_002083	372	372	A	G	90	0.12
Ovary	A_002083	375	375	G	A	90	0.12
Ovary	A_002083	664	664	G	A	120	0.2
Ovary	A_002083	684	684	C	T	124	0.16
Ovary	A_002083	685	685	G	A	123	0.2
Ovary	A_002083	813	813	C	T	94	0.21
Ovary	A_002083	924	924	C	A	71	0.13
Ovary	A_002083	1111	1111	A	G	14	0.43
Ovary	A_002084	162	162	G	T	10	0.3
Ovary	A_002084	248	248	G	A	19	0.32
Ovary	A_002084	318	318	G	A	19	0.47
Ovary	A_002084	337	337	G	A	18	0.28
Ovary	A_002084	354	354	A	G	17	0.29
Ovary	A_002084	393	393	G	T	16	0.19
Ovary	A_002084	479	479	C	A	6	0.83
Ovary	A_002084	498	498	G	C	5	0.8
Ovary	A_002084	506	506	A	T	4	0.75
Muscle	A_002086	238	238	C	T	17	0.18
Ovary	A_002086	238	238	C	T	9	0.44
Testicle	A_002086	238	238	C	T	11	0.36
Testicle	A_002086	409	409	A	G	8	0.5
Testicle	A_002086	430	430	G	A	8	0.37
Testicle	A_002093	40	40	C	A	5	0.6
Testicle	A_002093	102	102	T	C	6	0.67
Testicle	A_002093	389	389	C	T	5	0.6
Muscle	A_002094	18	18	A	C	3	1
Muscle	A_002094	27	27	T	C	3	1
Muscle	A_002094	110	110	T	C	3	1
Testicle	A_002094	201	201	C	T	4	1
Muscle	A_002095	169	169	T	A	30	0.2
Ovary	A_002095	169	169	T	A	16	0.19
Testicle	A_002095	193	193	G	A	16	0.25
Muscle	A_002095	304	304	A	G	28	0.36
Ovary	A_002095	304	304	A	G	17	0.35
Muscle	A_002095	364	364	T	G	23	0.17
Ovary	A_002095	364	364	T	G	16	0.19
Muscle	A_002114	57	57	T	G	6	0.5
Muscle	A_002114	124	124	C	T	14	0.36
Muscle	A_002114	142	142	C	T	16	0.5
Muscle	A_002114	145	145	C	T	17	0.35
Muscle	A_002114	148	148	G	A	17	0.82
Muscle	A_002114	152	152	T	C	17	0.47
Muscle	A_002114	178	178	T	A	18	0.5
Muscle	A_002114	197	197	T	C	8	0.37
Muscle	A_002114	223	223	A	G	11	0.36
Muscle	A_002114	235	235	T	C	11	0.45
Testicle	A_002116	445	445	G	A	10	0.4
Testicle	A_002116	448	448	T	C	10	0.4
Testicle	A_002116	452	452	G	A	10	0.4
Testicle	A_002116	480	480	C	T	14	0.29
Testicle	A_002116	488	488	A	C	14	0.29
Testicle	A_002116	493	493	C	A	15	0.33
Testicle	A_002116	502	502	G	A	16	0.37
Testicle	A_002116	507	507	A	G	16	0.37
Testicle	A_002116	551	551	A	C	8	0.37
Testicle	A_002116	566	566	A	G	8	0.37
Testicle	A_002116	573	573	A	G	7	0.43
Testicle	A_002118	452	452	G	A	9	0.33
Ovary	A_002120	85	85	C	T	13	0.31
Ovary	A_002120	91	91	G	A	13	0.54
Ovary	A_002120	165	165	G	C	12	0.25
Ovary	A_002120	196	196	G	A	15	0.27
Ovary	A_002120	229	229	A	G	11	0.45
Ovary	A_002120	262	262	T	A	7	0.43
Ovary	A_002120	265	265	A	T	7	0.43
Ovary	A_002120	268	268	C	T	7	0.43
Ovary	A_002120	280	280	G	A	7	0.43
Testicle	A_002121	135	135	A	T	5	0.6
Muscle	A_002121	138	138	T	G	6	0.5
Muscle	A_002121	141	141	C	T	6	0.5
Muscle	A_002121	192	192	T	C	4	0.75
Muscle	A_002122	17	17	G	A	12	0.25
Muscle	A_002122	28	28	A	C	13	0.31
Muscle	A_002122	49	49	G	A	15	0.27
Muscle	A_002122	57	57	T	C	17	0.41
Muscle	A_002122	77	77	C	G	19	0.16
Muscle	A_002122	91	91	G	T	21	0.24
Muscle	A_002122	96	96	A	G	23	0.22
Muscle	A_002122	105	105	A	T	25	0.24
Muscle	A_002122	124	124	A	G	25	0.2
Muscle	A_002122	132	132	G	A	24	0.12
Muscle	A_002122	146	146	T	A	23	0.57
Muscle	A_002122	147	147	T	G	23	0.26
Muscle	A_002122	150	150	G	A	23	0.26
Muscle	A_002122	153	153	T	A	23	0.17
Muscle	A_002122	157	157	T	A	22	0.41
Muscle	A_002122	158	158	C	A	23	0.22
Muscle	A_002122	160	160	C	T	22	0.18
Ovary	A_002123	188	188	C	G	20	0.65
Testicle	A_002123	188	188	C	G	4	0.75
Ovary	A_002123	211	211	C	G	21	0.48
Ovary	A_002123	257	257	G	C	13	0.31
Ovary	A_002124	80	80	G	A	58	0.26
Ovary	A_002124	162	162	A	G	32	0.72
Muscle	A_002126	1847	1847	T	A	22	0.27
Testicle	A_002126	2360	2360	C	A	18	0.22
Testicle	A_002126	2367	2367	T	C	16	0.31
Muscle	A_002126	2392	2392	T	C	10	0.4
Testicle	A_002126	2418	2418	T	A	15	0.2
Testicle	A_002126	4417	4417	G	A	15	0.4
Testicle	A_002126	4498	4498	C	T	10	0.3
Muscle	A_002126	5422	5422	T	C	7	0.86
Testicle	A_002126	5649	5649	A	G	7	0.43
Muscle	A_002127	1721	1721	T	C	12	0.33
Muscle	A_002127	2105	2105	C	T	29	0.1
Muscle	A_002127	2146	2146	G	T	28	0.21
Muscle	A_002127	3037	3037	G	T	38	0.26
Muscle	A_002127	4071	4071	T	C	40	0.12
Ovary	A_002128	779	779	A	C	29	0.24
Ovary	A_002128	935	935	T	C	26	0.15
Ovary	A_002128	1080	1080	G	A	36	0.14
Ovary	A_002128	1320	1320	A	G	35	0.23
Ovary	A_002128	1346	1346	C	T	33	0.24
Ovary	A_002128	1353	1353	C	A	33	0.27
Ovary	A_002128	1466	1466	T	A	27	0.22
Ovary	A_002128	1599	1599	T	C	21	0.33
Ovary	A_002128	1737	1737	G	C	18	0.39
Ovary	A_002128	2128	2128	C	G	34	0.38
Ovary	A_002128	2133	2133	C	A	33	0.36
Ovary	A_002128	2196	2196	G	A	31	0.35
Ovary	A_002128	2294	2294	C	T	31	0.39
Ovary	A_002128	2352	2352	C	T	32	0.41
Ovary	A_002128	2550	2550	A	T	24	0.42
Ovary	A_002128	2624	2624	C	T	20	0.5
Ovary	A_002128	2655	2655	C	T	18	0.44
Ovary	A_002128	2832	2832	G	A	10	0.5
Ovary	A_002128	2834	2834	C	T	10	0.5
Ovary	A_002128	2856	2856	A	G	13	0.38
Ovary	A_002128	2885	2885	G	A	16	0.31
Ovary	A_002128	2950	2950	T	A	14	0.29
Ovary	A_002128	3208	3208	G	A	14	0.36
Ovary	A_002128	3219	3219	T	C	13	0.46
Ovary	A_002128	3228	3228	T	A	13	0.46
Ovary	A_002128	3231	3231	T	C	12	0.5
Ovary	A_002128	3294	3294	G	A	13	0.46
Ovary	A_002128	3333	3333	T	A	12	0.5
Ovary	A_002128	3338	3338	C	T	11	0.55
Ovary	A_002128	3435	3435	C	T	9	0.44
Ovary	A_002128	3493	3493	G	A	9	0.33
Ovary	A_002128	3505	3505	C	A	8	0.37
Ovary	A_002128	3512	3512	A	T	9	0.33
Ovary	A_002128	3526	3526	T	G	10	0.4
Ovary	A_002128	3537	3537	C	T	9	0.33
Muscle	A_002129	1380	1380	C	T	15	0.33
Muscle	A_002129	1661	1661	C	T	12	0.33
Muscle	A_002129	1823	1823	C	A	11	0.36
Muscle	A_002129	2027	2027	G	A	19	0.16
Muscle	A_002129	2624	2624	T	C	9	0.44
Muscle	A_002129	3140	3140	T	C	16	0.56
Muscle	A_002129	3314	3314	T	C	12	0.33
Muscle	A_002129	3680	3680	T	A	25	0.24
Muscle	A_002129	3827	3827	G	A	32	0.22
Muscle	A_002129	4253	4253	C	T	32	0.31
Muscle	A_002129	4358	4358	A	G	33	0.33
Muscle	A_002129	4379	4379	C	T	34	0.35
Muscle	A_002129	4457	4457	A	G	37	0.27
Muscle	A_002129	4617	4617	C	T	40	0.1
Muscle	A_002129	4646	4646	T	C	43	0.12
Muscle	A_002129	6151	6151	A	G	29	0.24
Muscle	A_002129	6234	6234	C	T	22	0.36
Ovary	A_002130	101	101	C	T	19	0.21
Ovary	A_002130	125	125	A	T	17	0.29
Ovary	A_002130	272	272	G	A	27	0.19
Ovary	A_002130	530	530	C	T	52	0.15
Ovary	A_002130	632	632	C	T	46	0.15
Ovary	A_002130	1316	1316	G	A	32	0.25
Ovary	A_002130	1361	1361	T	A	35	0.2
Ovary	A_002130	1685	1685	G	A	30	0.17
Ovary	A_002130	1691	1691	C	A	30	0.4
Ovary	A_002130	1712	1712	C	T	28	0.11
Ovary	A_002130	2441	2441	A	G	23	0.57
Ovary	A_002130	2615	2615	A	C	17	0.35
Ovary	A_002130	3092	3092	C	T	11	0.27
Ovary	A_002130	5738	5738	A	G	8	0.5
Ovary	A_002130	5977	5977	G	A	7	0.43
Testicle	A_002131	798	798	C	T	8	0.5
Testicle	A_002131	1293	1293	T	C	9	0.44
Testicle	A_002131	1300	1300	G	A	9	0.44
Testicle	A_002131	1329	1329	G	T	8	0.37
Testicle	A_002131	1429	1429	G	A	7	0.43
Testicle	A_002131	2025	2025	A	T	11	0.36
Testicle	A_002131	2070	2070	C	A	16	0.56
Testicle	A_002131	2124	2124	A	G	13	0.23
Testicle	A_002131	2529	2529	C	T	9	0.33
Testicle	A_002131	2694	2694	C	T	11	0.36
Testicle	A_002131	2826	2826	G	A	14	0.29
Testicle	A_002131	2949	2949	T	C	9	0.56
Testicle	A_002131	3177	3177	C	T	12	0.25
Testicle	A_002131	3262	3262	C	G	10	0.3
Testicle	A_002131	3270	3270	C	T	10	0.3
Testicle	A_002131	3282	3282	C	T	11	0.45
Testicle	A_002131	3307	3307	G	T	14	0.21
Testicle	A_002131	3318	3318	A	C	14	0.21
Testicle	A_002131	3345	3345	A	G	12	0.25
Testicle	A_002131	3357	3357	C	A	12	0.33
Testicle	A_002131	3454	3454	A	G	15	0.4
Testicle	A_002131	3717	3717	C	T	11	0.36
Testicle	A_002131	4044	4044	A	G	13	0.54
Testicle	A_002131	4104	4104	C	G	14	0.57
Testicle	A_002131	4227	4227	G	A	16	0.37
Testicle	A_002131	4232	4232	C	A	15	0.33
Testicle	A_002131	4243	4243	C	T	15	0.33
Testicle	A_002131	4244	4244	A	G	15	0.33
Testicle	A_002131	4291	4291	C	A	15	0.27
Testicle	A_002131	4365	4365	C	T	19	0.21
Testicle	A_002131	4374	4374	T	C	20	0.2
Testicle	A_002131	4395	4395	C	T	19	0.21
Testicle	A_002131	4461	4461	A	G	18	0.44
Testicle	A_002131	4511	4511	T	C	21	0.48
Testicle	A_002131	4676	4676	C	T	20	0.25
Testicle	A_002131	4823	4823	C	T	19	0.47
Testicle	A_002131	5048	5048	T	C	18	0.44
Testicle	A_002131	5182	5182	A	G	16	0.25
Testicle	A_002131	5321	5321	C	T	18	0.28
Testicle	A_002131	5351	5351	T	C	21	0.24
Testicle	A_002131	5522	5522	T	C	19	0.42
Testicle	A_002131	5534	5534	T	C	18	0.44
Testicle	A_002131	5945	5945	G	A	10	0.4
Muscle	A_002132	463	463	G	A	6	0.5
Muscle	A_002132	3606	3606	G	A	9	0.44
Muscle	A_002132	3759	3759	A	G	9	0.56
Muscle	A_002132	3792	3792	A	G	10	0.5
Muscle	A_002132	3923	3923	A	G	13	0.31
Muscle	A_002132	4290	4290	T	C	13	0.23
Muscle	A_002132	4614	4614	G	C	13	0.38
Muscle	A_002132	5121	5121	C	T	9	0.33
Muscle	A_002133	986	986	T	C	13	0.46
Muscle	A_002134	1315	1315	A	C	8	0.5
Muscle	A_002134	4764	4764	C	T	18	0.5
Muscle	A_002134	5496	5496	A	G	30	0.1
Muscle	A_002134	5555	5555	A	G	29	0.14
Muscle	A_002135	2072	2072	T	C	15	0.27
Muscle	A_002135	3253	3253	G	A	16	0.56
Muscle	A_002135	3933	3933	G	A	16	0.19
Muscle	A_002135	3956	3956	C	T	16	0.25
Muscle	A_002135	4296	4296	G	T	16	0.31
Muscle	A_002136	1818	1818	A	C	8	0.37
Testicle	A_002136	1818	1818	A	C	8	0.37
Muscle	A_002137	1957	1957	A	G	9	0.33
Muscle	A_002137	4569	4569	T	C	12	0.33
Muscle	A_002137	4599	4599	T	C	11	0.27
Muscle	A_002137	4651	4651	A	C	10	0.3
Testicle	A_002138	1414	1414	T	G	12	0.33
Muscle	A_002138	2196	2196	T	C	14	0.43
Testicle	A_002138	2887	2887	C	T	7	0.43
Testicle	A_002138	3289	3289	G	T	12	0.67
Muscle	A_002139	798	798	C	T	49	0.18
Muscle	A_002139	1257	1257	C	T	52	0.52
Muscle	A_002139	1386	1386	A	G	59	0.32
Muscle	A_002139	1392	1392	C	T	59	0.32
Muscle	A_002139	1410	1410	C	T	55	0.45
Muscle	A_002139	1494	1494	C	T	68	0.35
Muscle	A_002139	2058	2058	T	C	69	0.29
Muscle	A_002139	2196	2196	T	C	58	0.12
Muscle	A_002139	2418	2418	A	G	77	0.18
Muscle	A_002139	2607	2607	C	T	109	0.25
Muscle	A_002139	2667	2667	T	C	104	0.2
Muscle	A_002139	3204	3204	C	T	80	0.21
[truncated: 3,729 more rows]
[truncated: 3 more columns]

## Sheet: GFP Indels Contigs
	Reference	Start	End	Reference	Variant	Total	Variant
Library	Accession Number	Position	Position	Nucleotide	Nucleotide	Depth	Frequency
Muscle	A_000006	3723	3725	TTG	CTC	316	0.34
Muscle	A_000008	29	29	-	ACC	43	0.3
Muscle	A_000008	169	169	G	-	140	0.52
Muscle	A_000008	536	536	-	A	234	0.89
Muscle	A_000011	15	15	-	CT	10	0.3
Testicle	A_000011	34	36	TTT	A	6	0.5
Testicle	A_000011	89	89	-	CTC	5	0.6
Testicle	A_000011	130	132	ATG	TT	7	0.86
Muscle	A_000012	421	421	-	GAGA	56	0.12
Ovary	A_000012	421	421	-	GAGAGA	85	0.27
Testicle	A_000012	421	421	-	GA	45	0.18
Ovary	A_000012	504	505	CT	-	57	0.25
Muscle	A_000012	504	506	CTT	-	48	0.4
Testicle	A_000012	504	506	CTT	-	33	0.24
Muscle	A_000012	778	781	AGAG	-	57	0.56
Ovary	A_000012	778	781	AGAG	-	55	0.56
Testicle	A_000012	780	781	AG	-	30	0.47
Muscle	A_000012	781	781	-	AG	58	0.12
Ovary	A_000012	781	781	-	AG	55	0.16
Muscle	A_000024	75	75	-	C	29	0.72
Muscle	A_000024	79	79	G	-	31	0.48
Muscle	A_000024	203	203	G	-	36	0.5
Muscle	A_000024	431	432	GT	-	56	0.55
Muscle	A_000024	434	434	C	ACT	55	0.6
Muscle	A_000024	513	514	AA	TG	70	0.5
Muscle	A_000024	680	683	CCCC	TCCT	82	0.59
Muscle	A_000024	833	834	AC	GT	73	0.58
Muscle	A_000024	908	908	-	A	67	0.6
Muscle	A_000024	914	915	TT	-	67	0.52
Muscle	A_000024	929	932	AAAG	CAAA	62	0.58
Muscle	A_000024	1052	1055	CCCC	TCCT	53	0.75
Testicle	A_000025	62	87	CAGTTATAGAAAGGTTGATGGGAACA	-	11	0.36
Testicle	A_000025	355	355	-	CGAGTA	14	0.21
Testicle	A_000026	6	6	-	AAG	4	0.75
Testicle	A_000026	14	17	CTTC	TCTTA	18	0.44
Testicle	A_000026	53	55	AAG	-	128	0.12
Testicle	A_000026	130	130	-	A	170	0.11
Testicle	A_000026	151	151	-	GGC	164	0.12
Testicle	A_000026	154	159	CAGCTT	TTA	159	0.12
Testicle	A_000026	203	203	-	G	152	0.13
Testicle	A_000026	345	347	CAA	GCAGAC	31	0.26
Testicle	A_000026	366	367	GG	TT	31	0.23
Testicle	A_000026	374	376	GAA	-	31	0.23
Testicle	A_000026	378	378	-	TAT	31	0.23
Testicle	A_000026	395	396	TT	AA	29	0.24
Testicle	A_000028	319	320	CT	G	12	0.25
Testicle	A_000028	356	357	CC	AA	107	0.42
Muscle	A_000104	4073	4073	-	T	21	0.33
Ovary	A_000168	1467	1480	TACAAATTCCACAT	ACAAATTCACA	7	0.43
Ovary	A_000171	3056	3056	G	-	7	0.86
Muscle	A_000179	220	220	G	AAA	8	1
Muscle	A_000179	268	268	-	A	10	1
Muscle	A_000180	105	105	G	TGGCAGCTTTCGACACTTGACAGAAA	5	0.8
Muscle	A_000187	493	568	TGATGATGATGACGATGATGATGATGACGACGACGACGACGACGACGACGGGGACGGGGACGACGAAGACGACGAC	GATGATGATGGTGATGATGATGAGAGGAGGAT	6	0.5
Testicle	A_000213	599	600	CG	GA	38	0.87
Testicle	A_000213	645	645	C	-	14	1
Ovary	A_000226	966	1007	TGTTCTAACTACCCCAAGAGTGAATGCTAATGGTGTGGTGGG	-	6	1
Ovary	A_000227	898	939	TGTTCTAACTACCCCAAGAGTGAATGCTAATGGTGTGGTGGG	-	5	1
Ovary	A_000236	276	276	-	TTT	3	1
Ovary	A_000236	297	297	-	AACTGAGCCTTAGCTTCAAAACTGGGCATCTGAA	3	1
Ovary	A_000236	303	303	-	GTTTTAGAG	3	1
Ovary	A_000236	307	307	-	ATTTATT	4	0.75
Ovary	A_000236	332	332	-	TTGT	4	1
Ovary	A_000236	1138	1138	-	CCAAAAA	4	1
Ovary	A_000236	1219	1219	-	TTTTTG	4	1
Ovary	A_000241	334	336	GTT	-	8	0.37
Ovary	A_000242	270	270	-	A	11	0.73
Ovary	A_000242	382	383	GT	-	10	0.3
Ovary	A_000242	481	481	-	AC	15	0.2
Ovary	A_000242	490	490	-	TTCAT	15	0.2
Ovary	A_000242	621	621	-	TTATTCT	8	0.62
Testicle	A_000278	2513	2513	-	AAATTTT	7	0.71
Testicle	A_000278	2535	2535	-	C	7	1
Testicle	A_000278	2620	2620	T	AAAAAGTCCTACTTTTA	6	1
Testicle	A_000278	3169	3169	-	GAA	5	1
Ovary	A_000291	153	153	T	GTAAGACAAGTGGAATACAATTGCTG	5	1
Ovary	A_000291	241	242	TT	C	5	1
Ovary	A_000294	3702	3709	GTTAACTC	AT	4	1
Ovary	A_000299	413	416	ACAA	G	7	0.43
Ovary	A_000299	439	439	-	GACAAA	3	1
Ovary	A_000301	278	288	AGAAAGCTGAA	-	10	0.4
Ovary	A_000301	362	362	-	AGTT	11	0.45
Ovary	A_000304	71	71	-	ATT	23	0.35
Ovary	A_000304	358	358	-	AA	86	0.28
Ovary	A_000304	610	613	AAAT	-	38	0.11
Ovary	A_000304	639	640	TG	-	33	0.27
Ovary	A_000304	740	740	-	GTCA	10	0.7
Ovary	A_000304	954	960	TAATCAA	-	5	1
Ovary	A_000305	261	261	-	GATTAG	12	1
Ovary	A_000305	514	514	-	A	14	1
Ovary	A_000305	638	638	-	A	8	1
Ovary	A_000305	644	644	-	T	8	0.87
Ovary	A_000305	647	647	-	A	8	1
Muscle	A_000306	385	385	-	T	7	1
Muscle	A_000306	392	392	-	T	7	1
Muscle	A_000306	434	434	-	G	7	1
Muscle	A_000306	447	447	-	CAAAAGG	7	1
Muscle	A_000308	385	385	-	T	11	1
Muscle	A_000308	392	392	-	T	11	1
Muscle	A_000308	434	434	-	G	11	1
Muscle	A_000308	447	447	-	CAAAAGG	11	0.82
Muscle	A_000308	621	621	-	T	8	1
Muscle	A_000310	261	261	-	T	8	1
Muscle	A_000310	268	268	-	T	8	1
Muscle	A_000310	310	310	-	G	8	1
Muscle	A_000310	323	323	-	CAAAAGG	8	0.75
Muscle	A_000310	1053	1053	-	ACCCAGGGGGAATTTGG	3	1
Muscle	A_000310	2034	2034	-	AT	3	1
Muscle	A_000310	2210	2210	-	TGGGGGGGGGGGA	3	1
Muscle	A_000310	2215	2216	GG	TGGGGGTTGGT	3	1
Muscle	A_000310	2223	2223	-	TTGGAGGGGGGCAGGG	3	1
Muscle	A_000312	385	385	-	T	10	1
Muscle	A_000312	392	392	-	T	10	1
Muscle	A_000312	434	434	-	G	10	1
Muscle	A_000312	447	447	-	CAAAAGG	10	1
Muscle	A_000312	621	621	-	T	7	1
Muscle	A_000314	385	385	-	T	11	1
Muscle	A_000314	392	392	-	T	11	1
Muscle	A_000314	434	434	-	G	11	1
Muscle	A_000314	447	447	-	CAAAAGG	11	0.64
Muscle	A_000314	621	621	-	T	6	1
Muscle	A_000316	310	310	-	G	19	1
Muscle	A_000316	324	325	AA	CAAAAG	19	0.95
Muscle	A_000316	328	328	-	GAA	19	0.89
Muscle	A_000316	497	497	-	T	13	1
Ovary	A_000324	344	344	-	CAAG	7	0.57
Ovary	A_000324	375	375	A	TAC	7	0.43
Muscle	A_000334	2912	2915	CTTC	AAACCCCCTTTTTTCT	17	1
Muscle	A_000334	2921	2921	-	TC	17	0.94
Muscle	A_000335	2899	2899	-	AAACCCCCTTTTTT	7	1
Muscle	A_000338	2900	2900	-	AAACCCCCTTTTTT	11	1
Muscle	A_000345	1861	1861	-	ATAAAAAACA	5	1
Testicle	A_000345	1861	1861	-	ATAAAAAACA	7	0.86
Muscle	A_000345	1926	1926	-	TTTAAAAA	6	1
Testicle	A_000345	1926	1926	-	TTTAAAAA	8	1
Testicle	A_000345	1993	1993	-	CTTTTATTTTTTGGAAACGAAAC	6	1
Testicle	A_000345	2066	2066	-	AAAAT	6	1
Testicle	A_000345	2250	2250	-	AAAGGTGT	3	1
Muscle	A_000345	2535	2535	-	TTCCCC	6	1
Ovary	A_000345	2535	2535	-	TTCCCC	3	1
Testicle	A_000345	2535	2535	-	TTCCCC	10	1
Muscle	A_000345	2605	2605	-	TTTTAGT	6	1
Muscle	A_000345	2617	2617	-	CCTTTTT	6	0.83
Testicle	A_000345	2703	2703	-	TT	8	1
Testicle	A_000346	892	892	G	CGC	3	1
Testicle	A_000346	937	937	-	TGGTGTCCCTGGAAGAT	3	1
Muscle	A_000346	2250	2250	-	AAAGGTGT	3	1
Ovary	A_000350	2314	2316	GTT	-	20	0.25
Ovary	A_000353	1469	1470	TG	-	5	0.8
Ovary	A_000399	434	437	CAAG	AA	4	0.75
Ovary	A_000402	96	96	-	T	6	1
Muscle	A_000407	625	625	C	-	6	1
Muscle	A_000407	731	731	-	CTT	17	0.76
Muscle	A_000407	733	733	-	A	17	0.76
Muscle	A_000407	736	739	TATT	-	17	0.76
Muscle	A_000407	973	976	GAAG	AAAA	18	0.67
Muscle	A_000407	985	987	TTC	CAA	18	0.78
Muscle	A_000409	13	13	-	T	16	0.87
Muscle	A_000409	120	120	-	C	131	0.94
Muscle	A_000409	141	141	-	T	150	0.95
Muscle	A_000409	366	368	TTC	CAG	263	0.97
Ovary	A_000444	570	570	A	TT	19	0.21
Ovary	A_000444	572	572	T	CTAA	19	0.21
Ovary	A_000444	611	612	CG	-	18	0.17
Ovary	A_000444	617	617	A	TCG	18	0.17
Ovary	A_000444	759	759	-	A	18	0.89
Ovary	A_000445	399	399	-	A	9	0.89
Ovary	A_000445	427	429	ATC	-	11	0.36
Ovary	A_000445	465	516	AGGCTTCTGTCCCAACAATATCCTGCAGCAATGTGAGTTTTGCTCTGGGAAA	C	10	0.3
Muscle	A_000448	782	782	-	AA	41	1
Muscle	A_000448	798	798	-	AAA	42	1
Muscle	A_000449	1047	1054	TGTTGTTG	-	28	0.18
Muscle	A_000449	1057	1057	-	GCCGG	30	0.17
Muscle	A_000449	1060	1065	GAACCA	CCT	28	0.18
Ovary	A_000451	333	334	AA	-	4	0.75
Ovary	A_000454	345	345	-	G	14	0.71
Muscle	A_000456	1101	1101	-	T	10	0.9
Testicle	A_000466	184	184	T	-	99	0.62
Ovary	A_000479	124	127	AGTT	TGTG	10	0.3
Ovary	A_000481	148	149	TC	-	14	0.21
Muscle	A_000483	3011	3011	A	TG	10	0.5
Ovary	A_000486	123	123	-	AAATTTTTG	10	1
Ovary	A_000486	148	148	-	T	14	1
Ovary	A_000486	386	389	ACAA	-	30	0.13
Ovary	A_000486	623	628	CTTACA	-	21	0.38
Ovary	A_000486	689	689	C	TA	17	0.24
Ovary	A_000488	123	123	-	AAATTTTTG	5	1
Ovary	A_000492	501	501	-	CC	6	0.83
Ovary	A_000492	514	514	-	AA	8	0.75
Ovary	A_000492	540	540	C	ACTT	11	0.91
Ovary	A_000492	570	571	AT	TTAC	12	0.75
Ovary	A_000492	638	638	-	GTC	25	0.44
Ovary	A_000492	666	667	GG	TGGT	27	0.44
Ovary	A_000492	951	969	AATCCACAGCTGCATTAGA	-	47	0.19
Ovary	A_000492	970	984	GAATCCACAGCTGCA	-	50	0.1
Ovary	A_000492	1069	1072	TTTG	AATTTTTC	58	0.22
Ovary	A_000492	1303	1305	CTA	-	23	0.26
Ovary	A_000493	550	550	-	T	6	1
Ovary	A_000493	983	983	-	AA	6	1
Ovary	A_000493	1051	1052	AT	TC	7	0.43
Ovary	A_000493	1127	1129	GGT	-	6	0.67
Ovary	A_000493	1265	1267	CTA	-	4	1
Ovary	A_000522	2540	2545	AGGAAG	-	7	1
Ovary	A_000522	2547	2547	-	T	7	1
Ovary	A_000522	2551	2551	A	TTTAT	7	1
Ovary	A_000522	2583	2583	-	CCTTTATATTTCT	6	1
Ovary	A_000522	3011	3011	-	G	16	0.62
Ovary	A_000522	3246	3246	-	A	8	1
Ovary	A_000522	3278	3278	-	CGAC	7	1
Ovary	A_000522	3288	3288	-	CGGGAGTTTGTTTAACCAA	5	1
Ovary	A_000529	109	109	-	CGT	40	0.4
Testicle	A_000549	57	57	-	CT	24	0.83
Testicle	A_000550	657	657	-	CATAAAAAA	8	1
Muscle	A_000564	472	472	G	-	15	0.93
Ovary	A_000564	472	472	G	-	15	1
Muscle	A_000565	2956	2956	-	GAAAAAGGAAA	3	1
Muscle	A_000566	3423	3423	-	TTAAATGCTCCCTTCAATTTTGTGCATCACAAAAAATCCATTT	3	1
Muscle	A_000566	3427	3427	-	CTTT	3	1
Muscle	A_000568	2837	2837	-	GAAAAGGAAAA	4	1
Ovary	A_000634	193	195	AAG	TAA	4	1
Muscle	A_000638	3885	3885	-	CCC	56	1
Ovary	A_000640	3087	3087	-	ACA	6	0.5
Ovary	A_000641	2712	2712	-	TTTTTC	4	1
Ovary	A_000641	2721	2721	-	ATTTTGG	4	1
Ovary	A_000641	2764	2765	GC	TT	10	0.3
Ovary	A_000641	2786	2786	-	ACG	10	0.3
Ovary	A_000652	1877	1879	TCA	-	21	0.24
Testicle	A_000660	280	283	TAAG	AA	8	0.87
Testicle	A_000660	315	316	CC	TCG	7	0.43
Testicle	A_000660	335	336	TC	AT	7	0.71
Testicle	A_000660	347	348	GC	TT	7	0.71
Ovary	A_000661	655	655	-	T	7	1
Ovary	A_000661	683	683	-	GG	9	0.56
Ovary	A_000661	818	818	-	GA	9	0.67
Ovary	A_000670	588	588	-	AC	9	0.56
Ovary	A_000676	1057	1057	-	CTTTTTC	14	1
Testicle	A_000676	1057	1057	-	CTTTTTC	3	1
Ovary	A_000678	816	816	-	CCC	3	1
Ovary	A_000684	720	720	-	GCAGTGAGCTA	5	0.6
Ovary	A_000685	126	127	CT	TG	15	0.27
Ovary	A_000685	365	366	CT	-	24	0.17
Ovary	A_000685	510	511	TA	AC	30	0.53
Ovary	A_000685	1018	1018	-	AAA	12	0.67
Ovary	A_000685	1031	1032	TA	-	13	0.23
Ovary	A_000685	1133	1133	-	TAAAT	16	0.19
Ovary	A_000685	1264	1264	C	TA	13	0.77
Ovary	A_000685	1346	1348	AAC	-	15	0.2
Ovary	A_000685	1488	1490	ATT	CCTC	16	0.31
Ovary	A_000685	1630	1630	-	CA	14	0.43
Ovary	A_000685	2187	2193	CAACCTA	-	18	0.22
Ovary	A_000685	2277	2277	-	GAC	25	0.48
Ovary	A_000685	2437	2437	-	CATTTA	22	0.14
Ovary	A_000686	461	461	T	CG	20	0.2
Ovary	A_000688	437	437	C	TA	14	0.29
Ovary	A_000691	753	753	T	GG	10	0.4
Ovary	A_000692	39	40	TC	AA	8	0.37
Ovary	A_000693	50	51	AA	TC	9	0.44
Ovary	A_000702	65	66	GG	-	4	0.75
Ovary	A_000704	179	180	GG	AT	10	0.4
Ovary	A_000710	649	649	-	CCCG	4	1
Ovary	A_000712	169	169	-	A	6	1
Ovary	A_000719	202	203	TG	C	7	0.43
Ovary	A_000719	284	285	AC	GT	9	0.78
Ovary	A_000719	291	293	AAC	G	8	0.37
Ovary	A_000719	410	410	A	CACAATT	8	0.37
Ovary	A_000736	456	459	TACC	-	8	0.37
Ovary	A_000744	96	97	GT	TAA	5	0.8
Ovary	A_000744	152	154	ATT	-	5	0.6
Ovary	A_000747	283	285	CAA	-	7	0.43
Ovary	A_000759	54	54	T	CTA	3	1
Ovary	A_000786	653	653	-	CC	6	0.83
Ovary	A_000786	704	704	-	GTCCCCAA	9	1
Muscle	A_000787	657	657	-	AGGGGAAGAGGAAGAGGCCGTGGCCGCGGAAGGG	20	1
Muscle	A_000787	711	711	-	GTCCCCAA	33	1
Ovary	A_000787	711	711	-	GTCCCCAA	4	1
Muscle	A_000788	702	702	-	CGTCCCCAA	4	1
Ovary	A_000799	1372	1372	-	AG	7	1
Testicle	A_000801	145	147	GAG	AAA	6	0.5
Testicle	A_000801	901	929	GCTGTCAGTGTTCCCTTTGGAGAGGCTGG	A	3	1
Muscle	A_000807	254	257	CCCT	TCCC	145	0.65
Muscle	A_000807	524	525	GT	-	39	0.72
Muscle	A_000807	527	527	C	ACT	35	0.71
Ovary	A_000809	1124	1124	-	G	8	1
Testicle	A_000816	665	665	-	ATAATCTTTTCT	5	1
Testicle	A_000816	811	811	-	TA	5	0.6
Ovary	A_000828	666	668	GGG	TGA	28	0.25
Testicle	A_000828	666	668	GGG	TGA	28	0.18
Ovary	A_000828	706	707	CC	AT	18	0.22
Testicle	A_000828	706	709	CCGA	ATGG	18	0.28
Testicle	A_000835	244	244	A	-	14	0.93
Muscle	A_000835	266	269	CTTA	-	9	0.67
Ovary	A_000835	266	269	CTTA	-	10	0.7
Testicle	A_000835	266	269	CTTA	-	11	0.45
Ovary	A_000837	148	149	AC	-	6	0.5
Ovary	A_000837	321	325	GCAAT	AAC	10	0.5
Ovary	A_000837	337	338	GC	TT	9	0.44
Ovary	A_000837	387	388	GC	AGT	7	0.57
Ovary	A_000845	170	170	-	CAGA	6	0.5
Ovary	A_000846	310	310	-	CAA	10	0.4
Muscle	A_000878	316	316	-	TGGAGCTGGACGTGCCCCC	9	0.78
Muscle	A_000878	377	377	-	AGAAGCCG	8	0.75
Muscle	A_000878	611	611	-	CCCTGTTGC	6	1
Muscle	A_000878	950	953	CTGC	T	3	1
Muscle	A_000878	1389	1393	CAAAG	TAAAA	30	0.13
Ovary	A_000885	808	808	-	A	13	1
Ovary	A_000890	131	131	-	CTTTAATTTATAAAACAATAATATTCCCACCGTATATTCAAGCTATTACG	4	1
Ovary	A_000890	747	747	-	AAAT	3	1
Ovary	A_000890	754	754	-	TTC	4	1
Ovary	A_000890	820	820	T	AAAACCTTCATTTTCATCTGAATACACAAATTTGGTTA	5	1
Ovary	A_000902	2131	2132	AA	CC	20	0.35
Ovary	A_000902	2141	2141	A	-	20	0.45
Ovary	A_000902	2155	2156	AA	CC	22	0.55
Ovary	A_000902	2165	2165	A	-	20	0.75
Ovary	A_000902	2170	2170	-	C	20	0.75
Ovary	A_000902	2179	2180	AA	CC	20	0.85
Ovary	A_000903	264	268	CTAAC	-	9	1
Ovary	A_000903	276	276	-	CTTT	18	1
Ovary	A_000907	1070	1070	A	TT	4	0.75
Muscle	A_000911	426	426	C	TCT	20	0.4
Muscle	A_000911	869	869	-	CT	22	0.41
Muscle	A_000911	1584	1584	C	-	25	0.6
Muscle	A_000911	1675	1676	GG	TA	13	0.23
Ovary	A_000914	224	225	TT	-	3	1
Muscle	A_000917	1062	1062	A	-	26	0.46
Ovary	A_000927	302	303	TT	GC	14	0.43
Ovary	A_000938	135	135	-	TTT	3	1
Ovary	A_000938	150	150	-	AAA	3	1
Ovary	A_000938	236	236	-	AAA	4	1
Ovary	A_000938	269	269	-	TT	3	1
Ovary	A_000938	288	288	-	TT	3	1
Testicle	A_000949	556	557	CC	TT	22	0.41
Testicle	A_000949	808	808	-	CC	10	0.5
Testicle	A_000949	828	831	CAAA	AAAG	9	0.44
Testicle	A_000953	78	79	AT	GC	10	0.7
Testicle	A_000953	139	139	T	CA	12	0.83
Testicle	A_000953	223	223	T	CA	6	0.67
Muscle	A_000964	6463	6463	-	TAGGGAGAAAATTATTTGGCAAATACCTAA	8	0.62
Ovary	A_000964	6463	6463	-	TAGGGAGAAAATTATTTGGCAAATACCTAA	3	1
Testicle	A_000964	6463	6463	-	TAGGGAGAAAATTATTTGGCAAATACCTAA	12	0.92
Testicle	A_000964	6552	6552	-	CAAAAAGAT	10	0.8
Muscle	A_000964	6601	6601	-	G	7	0.86
Muscle	A_000964	6601	6601	-	CATTTG	5	1
Testicle	A_000964	6601	6601	-	GAAGAAAAAAAACACATTTG	4	1
Muscle	A_000964	6614	6614	-	CTTTT	5	1
Testicle	A_000964	6614	6614	-	CTTTT	7	1
Muscle	A_000964	6627	6627	-	T	6	1
Testicle	A_000965	6280	6280	-	A	91	0.59
Muscle	A_000970	571	571	-	AG	14	0.86
Muscle	A_000970	575	575	-	GCG	13	1
Muscle	A_000970	1185	1185	-	ACA	23	1
Muscle	A_000970	1222	1222	-	TACGTCGCTACCATTATGAT	12	0.92
Muscle	A_000970	1762	1762	-	C	6	1
Muscle	A_000970	1767	1767	-	TT	7	0.86
Muscle	A_000970	1769	1769	-	C	13	1
Muscle	A_000970	1772	1774	ACC	-	13	1
Muscle	A_000970	1873	1873	-	TCCCTATGCTGATGCCTCTGTTGGTA	9	1
Muscle	A_000970	1875	1875	-	G	11	0.91
Muscle	A_000970	1915	1915	-	CCTTC	6	0.67
Muscle	A_000970	2250	2250	-	TAAAACCT	22	1
Muscle	A_000970	2278	2278	-	CAAAAAC	12	1
Muscle	A_000970	2324	2324	-	AACCA	9	1
Muscle	A_000970	2349	2349	-	CCAAAATCACTTCC	3	1
Muscle	A_000970	2407	2407	-	G	8	1
Muscle	A_000970	2412	2412	-	CG	11	1
Muscle	A_000970	2898	2898	-	AA	26	0.96
Muscle	A_000970	3015	3015	-	CCTTAAAA	10	1
Muscle	A_000971	1759	1759	A	-	7	0.86
Muscle	A_000973	197	197	A	-	10	1
Muscle	A_000984	2852	2853	CA	ACG	7	0.57
Muscle	A_000990	646	646	-	GGGCCACATGGCTCGTAATTG	4	1
Muscle	A_000990	788	788	-	GTTTTGGG	3	1
Muscle	A_000994	1898	1900	CCT	-	6	1
Muscle	A_000994	1902	1902	G	TT	6	1
Ovary	A_001004	1464	1464	-	TTTTTATA	4	1
Testicle	A_001004	1464	1464	-	TTTTTATTA	4	1
Testicle	A_001004	1493	1493	-	TCTTCTG	5	1
Ovary	A_001004	1935	1935	-	CCAGCAAAATGTCAATCATCAACTGAATCATGTTTCC	4	1
Ovary	A_001006	330	330	-	AATCTAAAT	5	0.8
Ovary	A_001006	432	432	-	GGGGTGAATGAAATATTCAAG	3	1
Ovary	A_001006	1012	1012	-	AAC	7	0.57
Ovary	A_001006	1325	1325	A	GAG	6	0.67
Ovary	A_001006	1492	1494	TGT	-	8	0.37
Ovary	A_001006	1495	1495	-	GTT	8	0.37
Muscle	A_001017	394	394	-	CTTCTGTATCTT	17	1
Muscle	A_001017	438	438	-	TTTTGTTGAT	21	1
Ovary	A_001017	1329	1340	TTCCTCAAAATG	-	6	1
Ovary	A_001019	739	739	-	TAAA	3	1
Ovary	A_001032	1295	1297	GTA	-	28	0.21
Muscle	A_001036	179	179	-	CTTTAAC	32	1
Ovary	A_001036	179	179	-	CTTTAAC	9	1
Muscle	A_001036	298	298	G	CAAAATGCGTT	30	1
Ovary	A_001036	298	298	G	CAAAATGCGTT	8	1
Muscle	A_001036	329	329	-	ACCCA	4	1
Ovary	A_001036	329	329	-	ACCCA	3	1
Muscle	A_001037	179	179	-	CTTTAAC	7	1
Muscle	A_001037	313	313	-	A	20	0.9
Muscle	A_001037	315	315	T	-	20	0.65
Ovary	A_001037	318	321	CTGT	TTTGCG	3	1
Muscle	A_001037	321	321	-	TTGCG	20	0.9
Muscle	A_001037	325	328	GAGA	TTGG	18	1
Ovary	A_001037	325	328	GAGA	TTGG	3	1
Muscle	A_001037	330	332	GTC	T	18	1
Ovary	A_001037	330	332	GTC	T	3	1
Ovary	A_001038	1710	1711	CT	-	7	0.43
Ovary	A_001042	1461	1461	-	ATTTTTAAAAA	5	1
Testicle	A_001043	1269	1270	CC	AA	69	0.48
Ovary	A_001046	1126	1127	TA	-	6	0.67
Ovary	A_001052	1391	1396	GCCAGG	AGCCATA	15	0.27
Ovary	A_001066	1137	1139	ATG	-	21	0.38
Ovary	A_001068	1334	1334	-	GACA	6	1
Ovary	A_001072	119	120	GA	-	16	0.19
Muscle	A_001075	74	74	-	GTTTT	4	0.75
Ovary	A_001080	450	453	AAAC	-	4	0.75
Ovary	A_001082	76	76	-	ACCATAAAAAAAGGGTTCGTTCGTTCGTTCCTCCAACAAAACACGCCGTC	3	1
Ovary	A_001082	143	143	A	TTTAT	3	1
Muscle	A_001082	1821	1822	TC	-	4	1
Ovary	A_001082	1821	1823	TCC	-	10	0.7
Ovary	A_001082	1828	1829	TC	-	10	0.5
Ovary	A_001092	1226	1226	A	-	15	0.93
Testicle	A_001092	1397	1397	-	T	64	1
Muscle	A_001092	1407	1407	C	-	101	1
Ovary	A_001110	717	717	-	CCAAAAATT	7	1
Ovary	A_001110	995	995	-	G	9	1
Ovary	A_001110	1099	1099	-	TTTTGCGGCTGTTAAATATCATTGTTTGTGGAAGTTATTTTTGGAA	5	1
Ovary	A_001110	1141	1141	-	AAAAG	8	0.87
Ovary	A_001134	116	116	-	TCGGGCATTTGTGTGAAATTTATGTTGTGGGTGGCTG	9	1
Ovary	A_001148	981	981	-	T	6	1
Muscle	A_001149	971	971	-	A	36	1
Ovary	A_001149	971	971	-	A	30	0.97
Testicle	A_001149	972	974	GTG	AGT	32	1
Ovary	A_001149	974	974	G	-	30	0.97
Muscle	A_001149	974	977	GTAG	T	38	0.95
Ovary	A_001149	977	979	GAT	TAAA	34	0.97
Testicle	A_001149	977	979	GAT	TAAA	32	1
Muscle	A_001149	979	979	-	AAA	40	1
Ovary	A_001156	485	485	-	TC	10	0.3
Ovary	A_001156	559	560	CA	-	9	0.33
Ovary	A_001168	933	935	GTG	-	14	0.21
Ovary	A_001180	955	961	AGGTGTG	-	6	0.5
Ovary	A_001184	70	70	G	-	10	0.8
Ovary	A_001184	240	244	TAACA	AG	5	0.6
Ovary	A_001184	767	767	A	TT	8	0.5
Muscle	A_001188	915	915	-	TGA	7	0.57
Muscle	A_001189	613	614	AT	-	5	1
Ovary	A_001189	613	614	AT	-	7	1
Testicle	A_001189	613	614	AT	-	8	1
Muscle	A_001201	106	106	-	TG	8	1
Ovary	A_001201	106	106	-	TG	6	1
Muscle	A_001204	224	224	-	TC	4	0.75
Muscle	A_001204	229	231	TGT	-	4	0.75
Muscle	A_001204	270	271	CG	AA	4	0.75
Muscle	A_001204	279	279	-	GT	4	0.75
Muscle	A_001206	104	104	-	ACTTACAAAGAGAAAGGCATACAA	3	1
Muscle	A_001206	720	720	-	TTTTTA	7	0.86
Muscle	A_001206	735	735	-	TTTTGAT	9	0.78
Ovary	A_001213	558	558	C	-	22	0.5
Ovary	A_001213	641	641	-	G	27	0.26
Ovary	A_001213	644	646	TCA	-	26	0.23
Ovary	A_001213	891	891	A	-	17	0.76
Ovary	A_001213	913	913	T	-	14	0.71
Ovary	A_001216	1076	1076	-	GGAAAACCCG	3	1
Muscle	A_001218	65	65	-	AAAAAAGGATTTTGACAAAGGAAAA	3	1
Muscle	A_001219	50	51	GC	-	3	1
Muscle	A_001232	710	710	-	TGGGGAGCGCTATGAAACAAAGGGGT	7	1
Ovary	A_001238	366	367	AC	GG	7	0.43
Ovary	A_001240	357	357	-	ATTTTTTGGTTAGAACTAGAAGATTGT	5	0.6
Ovary	A_001254	427	430	GATT	TA	9	0.67
Ovary	A_001257	813	813	-	AG	18	0.39
Ovary	A_001268	687	687	-	GAAATATTCTGATGGTGGGGTGTTAGAAG	4	0.75
Ovary	A_001268	709	709	T	AATTTTTTGG	5	1
Ovary	A_001308	462	462	-	GAG	8	0.37
Ovary	A_001312	290	290	T	CCTAAACC	7	0.57
Ovary	A_001312	423	425	ACA	-	14	0.29
Muscle	A_001313	370	371	TT	-	5	1
Testicle	A_001313	370	371	TT	-	6	1
Testicle	A_001313	475	475	T	-	107	1
Testicle	A_001370	769	775	CAATTAC	-	13	0.38
Testicle	A_001371	105	105	G	TA	8	0.5
Testicle	A_001371	114	116	TCC	-	9	0.56
Testicle	A_001371	183	186	ATTA	TTTT	8	0.75
Testicle	A_001371	197	197	A	CC	10	0.5
Testicle	A_001371	199	199	G	-	10	0.7
Ovary	A_001396	436	436	-	C	7	1
Testicle	A_001396	524	525	AG	-	9	0.33
Muscle	A_001397	257	257	G	CT	4	1
Ovary	A_001420	418	418	-	TT	3	1
Ovary	A_001422	623	624	TC	-	16	0.25
Ovary	A_001424	325	326	CC	TCA	8	0.37
Ovary	A_001424	467	469	ACC	CCT	13	0.38
Ovary	A_001424	596	597	AA	GT	11	0.27
Ovary	A_001424	615	617	AAA	GAC	7	0.43
Ovary	A_001425	497	497	-	ATA	12	0.33
Ovary	A_001425	523	525	AAA	TAG	11	0.55
Ovary	A_001428	502	504	CTC	-	17	0.24
Ovary	A_001428	605	605	-	CTT	10	0.8
Ovary	A_001428	636	638	TAT	-	7	1
Ovary	A_001428	660	665	GCCCCC	TGCCT	4	1
Ovary	A_001429	84	85	GT	-	8	0.37
Ovary	A_001429	209	210	TT	A	18	0.67
Ovary	A_001429	234	250	ACTTTTTCCCCAGTGTC	CCAG	15	0.2
Ovary	A_001429	367	367	-	TCT	19	0.16
Ovary	A_001429	424	426	TCT	-	15	0.2
Ovary	A_001429	527	528	CC	T	5	0.8
Ovary	A_001439	430	431	AG	C	4	0.75
Ovary	A_001444	16	16	-	TCTGCC	3	1
Testicle	A_001446	517	519	ACG	GGATAT	11	0.91
Testicle	A_001446	556	556	-	TGA	171	0.21
Testicle	A_001446	559	561	AAA	-	177	0.17
Testicle	A_001446	616	617	GA	-	313	0.11
Testicle	A_001446	621	621	-	TT	306	0.12
Ovary	A_001455	282	282	-	CAA	12	0.67
Ovary	A_001455	455	455	-	CGGA	13	0.92
Muscle	A_001462	459	459	-	AAAAGCTATGATTTC	4	1
Ovary	A_001468	23	26	CTTG	TTTT	6	0.83
Ovary	A_001469	183	183	T	CC	7	0.43
Ovary	A_001469	194	194	-	T	7	1
Ovary	A_001469	239	239	A	GAT	8	1
Testicle	A_001490	615	618	AAAA	GAAC	4	0.75
Ovary	A_001494	416	417	TT	CA	10	0.4
Ovary	A_001522	271	272	AA	GAT	9	0.33
Ovary	A_001523	225	226	TT	-	4	1
Ovary	A_001523	229	230	TG	-	4	1
Ovary	A_001561	250	252	TCC	-	6	0.67
Ovary	A_001561	255	256	CG	-	6	0.67
Ovary	A_001561	291	292	TA	-	6	0.67
Ovary	A_001572	118	120	CCC	TTT	7	0.43
Ovary	A_001573	314	314	G	TA	5	0.8
Ovary	A_001573	316	317	CT	ACC	5	1
Muscle	A_001606	401	406	GATCAT	CGAATGATTA	20	1
Ovary	A_001606	403	404	TC	ATG	24	1
Ovary	A_001606	406	406	-	TA	33	1
Testicle	A_001606	406	406	-	TA	27	1
Muscle	A_001606	412	414	GGC	-	207	0.99
Ovary	A_001606	412	414	GGC	-	212	0.99
Testicle	A_001606	412	414	GGC	-	179	0.98
Muscle	A_001619	25	25	G	AGC	4	1
Ovary	A_001622	490	491	TC	-	7	0.57
Ovary	A_001622	493	493	-	G	7	1
Testicle	A_001630	301	301	T	CTA	10	0.3
Ovary	A_001658	419	420	TT	C	4	0.75
Ovary	A_001678	320	321	CA	-	10	0.3
Ovary	A_001678	323	326	TTTC	-	10	0.3
Ovary	A_001679	273	275	GAG	AAA	3	1
Muscle	A_001694	577	577	-	AC	4	0.75
Ovary	A_001710	402	402	-	CA	6	0.5
Ovary	A_001718	58	58	-	AC	6	0.67
Testicle	A_001732	271	272	GG	C	3	1
Ovary	A_001792	108	110	CAA	T	5	0.6
Ovary	A_001796	136	136	-	TA	7	0.43
Ovary	A_001800	159	160	GG	A	4	0.75
Ovary	A_001800	286	290	ATCTA	CT	5	0.6
Ovary	A_001806	204	204	-	TT	6	0.83
Ovary	A_001806	339	339	-	A	6	1
Ovary	A_001812	331	360	ACTTTCTCGTTTACGTGAATAATTAACACC	-	7	0.43
Ovary	A_001813	297	297	-	C	248	0.1
Ovary	A_002029	313	315	GTC	-	14	0.29
Ovary	A_002031	19	20	CA	-	6	0.5
Ovary	A_002042	536	536	-	AAGCTGATACCTGAATTGTCTTATATAATTC	4	0.75
Ovary	A_002047	42	68	GTGACTTTTTGTTTGTGAAATATGTTG	-	8	0.75
Muscle	A_002051	533	535	GAG	-	3	1
Muscle	A_002073	375	377	GAA	AC	22	0.18
Muscle	A_002073	525	526	AT	G	25	0.88
Ovary	A_002084	217	217	C	TG	14	0.29
Ovary	A_002084	451	469	CTCATCAGATTCTTGCCTC	-	6	0.83
Testicle	A_002093	21	23	GAA	-	5	0.6
Muscle	A_002094	166	166	-	A	7	1
Muscle	A_002094	168	168	-	C	7	1
Muscle	A_002094	209	209	-	C	6	1
Muscle	A_002098	321	321	-	A	143	0.38
Ovary	A_002098	321	321	-	A	129	0.32
Testicle	A_002098	321	321	-	A	126	0.28
Muscle	A_002098	322	322	C	-	143	0.88
Ovary	A_002098	322	322	C	-	129	0.85
Testicle	A_002098	322	322	C	-	126	0.79
Muscle	A_002114	187	188	AG	TA	11	0.27
Muscle	A_002114	201	202	CC	TT	8	0.37
Ovary	A_002115	258	258	-	TTT	5	0.8
Testicle	A_002116	463	464	GG	AA	10	0.4
Testicle	A_002116	556	557	AA	C	8	0.37
Ovary	A_002120	118	121	ACCC	TACCCT	10	0.4
Muscle	A_002122	66	67	TG	GGA	17	0.24
Ovary	A_002123	238	238	-	GAGG	16	0.25
Ovary	A_002123	261	261	-	GAGG	12	0.25
Muscle	A_002126	2738	2740	TAT	-	5	1
Testicle	A_002126	4388	4389	TT	-	14	0.29
Muscle	A_002127	2131	2131	-	G	28	0.46
Ovary	A_002128	2178	2180	TCC	CCT	32	0.25
Ovary	A_002128	3235	3236	GA	CC	12	0.5
Testicle	A_002131	4502	4502	-	G	20	0.3
Testicle	A_002131	5238	5240	ACA	-	15	0.27
Muscle	A_002135	957	957	-	ATC	28	0.21
Muscle	A_002139	160	161	TC	GT	46	0.13
Ovary	A_002144	830	830	A	-	43	0.6
Testicle	A_002145	3582	3584	CTT	TTC	11	0.36
Ovary	A_002148	268	270	ATA	-	9	0.44
Ovary	A_002148	505	514	TTAACCTGCA	-	9	0.33
Ovary	A_002149	649	651	CAG	-	19	0.16
Ovary	A_002149	2179	2181	CAG	-	17	0.53
Ovary	A_002151	2336	2336	-	TGTGTGTGTG	12	0.33
Ovary	A_002153	779	779	-	A	18	0.39
Muscle	A_002154	2403	2405	TAA	-	7	0.57
Ovary	A_002157	392	392	-	CGA	17	0.59
Ovary	A_002157	956	957	CT	-	17	0.35
Ovary	A_002157	1920	1921	GA	-	15	0.2
Ovary	A_002157	3312	3314	GCG	C	14	0.86
Ovary	A_002157	3318	3323	AATCAA	TTC	14	0.86
Ovary	A_002158	2100	2114	CTCTTCCCTTTTTGA	-	13	0.38
Ovary	A_002158	2105	2112	CCCTTTTT	-	13	0.46
Ovary	A_002160	249	251	AAA	-	33	0.15
Ovary	A_002160	1953	1954	CC	AT	32	0.16
Ovary	A_002160	2685	2688	ACTT	-	38	0.18
Testicle	A_002163	2302	2304	AAG	-	3	1
Ovary	A_002170	701	703	GTT	-	15	0.53
Ovary	A_002170	1825	1826	AT	-	12	0.42
Muscle	A_002171	528	529	CA	-	51	0.22
Muscle	A_002171	529	529	-	CA	51	0.33
Muscle	A_002171	725	727	AGA	-	35	0.23
Muscle	A_002171	732	733	TT	-	33	0.24
Ovary	A_002174	1804	1806	GAT	-	13	0.31
Muscle	A_002176	2376	2379	TGTC	-	251	0.11
Muscle	A_002177	872	874	TGT	-	16	0.56
Muscle	A_002177	1331	1334	CACA	-	40	0.27
Muscle	A_002177	1335	1336	CA	-	40	0.1
Muscle	A_002177	2197	2205	TAAGAAATT	-	15	0.2
Testicle	A_002187	229	232	CCCT	TCCC	8	0.62
Muscle	A_002187	2090	2092	TGA	-	11	0.27
Testicle	A_002194	155	156	AC	GA	13	0.38
Testicle	A_002194	891	892	CA	TT	21	0.19
Ovary	A_002196	83	83	C	-	14	0.71
Muscle	A_002207	310	310	-	A	35	0.17
Muscle	A_002207	327	332	ATTATT	-	33	0.24
Muscle	A_002207	2464	2465	CA	GT	42	0.19
Muscle	A_002207	2466	2466	-	TAT	42	0.19
Muscle	A_002207	2479	2479	-	ACA	35	0.14
Testicle	A_002217	1493	1494	AT	-	8	0.5
Muscle	A_002219	314	316	TTC	-	40	0.3
Muscle	A_002219	1592	1597	CAGTTA	-	48	0.46
Muscle	A_002219	2224	2224	-	T	32	0.19
Muscle	A_002230	506	506	A	TAG	15	0.2
Ovary	A_002234	911	913	ATA	TTT	50	0.18
Muscle	A_002243	2164	2165	TA	-	39	0.18
Muscle	A_002243	2183	2183	-	G	36	0.19
Ovary	A_002246	1721	1722	GA	TT	26	0.27
Ovary	A_002247	779	782	AGAA	-	10	0.3
Ovary	A_002250	71	72	GA	-	6	0.5
Ovary	A_002250	1652	1652	-	AT	24	0.33
Ovary	A_002250	1730	1731	AG	-	19	0.21
Ovary	A_002254	782	783	GG	A	20	0.15
Ovary	A_002254	1213	1216	GATA	-	27	0.19
Ovary	A_002254	1719	1719	-	CT	17	0.41
Ovary	A_002254	2145	2145	-	GAA	6	0.67
Testicle	A_002278	363	364	TT	AC	16	0.44
Ovary	A_002291	930	930	-	G	34	0.38
Ovary	A_002291	1330	1330	C	AA	16	0.25
Testicle	A_002292	835	836	CA	-	16	0.37
Muscle	A_002306	1487	1497	AGGTGCGATTC	-	12	0.25
Muscle	A_002315	473	473	-	ACT	22	0.32
Ovary	A_002326	1758	1759	AA	GG	9	0.33
Ovary	A_002340	89	91	TTA	-	5	0.6
Ovary	A_002340	252	252	-	AG	7	0.43
Ovary	A_002340	259	262	ATTT	-	7	0.43
Ovary	A_002340	302	303	AA	TC	9	0.44
Ovary	A_002340	1826	1826	-	AA	6	0.5
Muscle	A_002346	969	971	TCT	-	7	0.57
Muscle	A_002351	767	767	T	AAAATA	7	0.43
Ovary	A_002356	135	136	TG	-	7	0.57
Ovary	A_002356	1131	1133	TTG	-	12	0.25
Ovary	A_002356	1176	1177	AT	-	14	0.21
Ovary	A_002363	1136	1137	AA	TT	31	0.13
Ovary	A_002363	1509	1510	CA	-	25	0.24
Muscle	A_002371	157	160	CTAA	-	8	0.5
Ovary	A_002371	1569	1569	T	CC	9	0.44
Muscle	A_002378	787	787	-	GGA	4	0.75
Ovary	A_002390	355	355	G	ACCT	7	0.86
Ovary	A_002390	559	560	AA	GG	7	0.43
Ovary	A_002390	930	937	TCATTCTA	CATTCT	4	0.75
Ovary	A_002401	116	117	TC	CCA	18	0.17
Ovary	A_002401	403	403	T	AAG	50	0.24
Ovary	A_002401	679	679	-	AG	57	0.14
Ovary	A_002406	1717	1720	TACG	-	5	0.6
Ovary	A_002410	1087	1088	GT	-	12	0.25
Ovary	A_002415	1391	1392	TA	CG	7	0.43
Ovary	A_002420	1253	1255	CGA	-	9	0.33
Ovary	A_002420	1364	1368	AGGGG	GGC	7	0.43
Ovary	A_002420	1470	1472	ACA	GGT	6	0.5
Ovary	A_002424	335	335	-	CA	14	0.21
Ovary	A_002424	420	422	CAA	-	16	0.31
Ovary	A_002425	1565	1567	AAG	GAA	6	0.5
Ovary	A_002431	1639	1642	TCAC	-	14	0.5
Ovary	A_002434	333	335	CTT	-	24	0.12
Ovary	A_002434	388	388	-	TTA	36	0.11
Ovary	A_002434	458	459	CT	-	40	0.15
Ovary	A_002475	269	271	GAC	AAA	11	0.36
Ovary	A_002479	555	557	CCT	TCCC	4	0.75
Muscle	A_002492	1295	1296	AT	-	23	0.13
Ovary	A_002492	1295	1296	AT	-	13	0.23
Testicle	A_002500	187	187	-	AGT	6	0.83
Muscle	A_002501	394	397	CGGG	TCGGA	14	0.29
Ovary	A_002503	908	909	CC	TT	18	0.28
Ovary	A_002503	908	909	CC	TT	18	0.44
Muscle	A_002516	965	965	-	T	46	0.2
Muscle	A_002520	930	931	CC	ACA	6	0.67
Muscle	A_002524	1154	1156	GGA	TGG	48	0.35
Ovary	A_002524	1154	1156	GGA	TGG	6	0.83
Muscle	A_002524	1231	1231	-	TGA	66	0.42
Testicle	A_002524	1231	1231	-	TGA	4	0.75
Muscle	A_002524	1491	1492	TC	-	25	0.12
Testicle	A_002542	1273	1274	GG	-	5	0.6
Muscle	A_002573	327	329	CTT	TG	10	0.3
Ovary	A_002579	819	820	AT	-	13	0.31
Ovary	A_002591	106	110	GCGCT	CCA	5	0.8
Ovary	A_002596	399	410	TACCAGCCCGCT	-	24	0.21
Ovary	A_002596	1016	1016	-	G	27	0.44
Ovary	A_002596	1142	1145	GTTA	-	20	0.2
Ovary	A_002615	1103	1106	TTTT	GTAG	8	0.37
Muscle	A_002618	1265	1265	-	A	8	0.87
Muscle	A_002618	1267	1268	AA	C	8	0.87
Ovary	A_002628	412	413	AC	-	13	0.38
Ovary	A_002628	413	413	-	CACA	13	0.23
Ovary	A_002630	228	230	CTT	-	23	0.3
Ovary	A_002630	392	393	AG	-	34	0.29
Ovary	A_002630	477	477	-	AAT	39	0.21
Ovary	A_002630	831	832	TT	A	58	0.21
Ovary	A_002630	1066	1066	-	GAG	40	0.17
Ovary	A_002630	1068	1070	CTT	-	38	0.18
Ovary	A_002631	918	920	ATA	-	10	0.6
Ovary	A_002635	738	739	AT	-	8	0.5
Muscle	A_002657	224	224	-	C	53	1
Ovary	A_002657	224	224	-	C	42	0.93
Testicle	A_002657	224	224	-	C	47	1
Ovary	A_002657	229	230	TT	CTG	6	0.5
Muscle	A_002657	230	230	-	G	46	1
Testicle	A_002657	230	230	-	G	43	0.98
Ovary	A_002657	235	239	GGGCC	-	6	0.5
Testicle	A_002658	526	530	CTTTT	TTTCC	14	0.29
Ovary	A_002660	1151	1152	TT	GC	7	0.57
Ovary	A_002665	921	922	CA	TCT	7	0.43
Ovary	A_002672	1147	1148	GG	TT	16	0.19
Ovary	A_002674	89	94	GAACAG	-	32	0.31
Ovary	A_002674	889	891	GAT	-	63	0.11
Ovary	A_002674	943	943	-	GTG	57	0.11
Ovary	A_002674	945	946	TG	-	59	0.1
Ovary	A_002674	1174	1176	GAA	-	42	0.17
Ovary	A_002679	403	404	CA	-	5	0.6
Ovary	A_002682	46	46	-	TCA	17	0.47
Ovary	A_002682	1065	1067	GAA	TGG	119	0.11
Muscle	A_002687	730	731	GT	C	122	0.93
Muscle	A_002687	749	752	CAAG	TGCC	130	0.93
Muscle	A_002687	765	767	CTC	TTG	296	0.96
Muscle	A_002687	829	829	A	-	78	0.88
Muscle	A_002687	832	833	CT	GGC	51	0.82
Muscle	A_002687	905	905	-	AT	96	0.85
Muscle	A_002687	908	913	CTTTGA	T	96	0.86
Muscle	A_002687	917	917	G	CCCC	96	0.86
Ovary	A_002694	1042	1043	AC	-	49	0.41
Ovary	A_002706	543	544	AA	TC	65	0.18
Ovary	A_002706	883	884	AA	GG	80	0.11
Testicle	A_002723	985	987	TCA	CCCCAG	19	0.16
Testicle	A_002723	987	991	ACCCC	CCCCA	17	0.41
Testicle	A_002723	995	997	CTT	-	17	0.18
Testicle	A_002723	1178	1179	TT	GTC	11	0.27
Testicle	A_002723	1209	1209	-	TA	8	0.37
Ovary	A_002735	228	228	-	TA	25	0.32
Ovary	A_002735	235	236	AC	-	26	0.38
Ovary	A_002735	248	248	-	GT	28	0.36
Ovary	A_002735	396	396	A	-	45	0.49
Ovary	A_002735	422	429	TCGAGTAT	-	44	0.18
Ovary	A_002735	442	442	-	CAGTA	47	0.17
Ovary	A_002737	434	434	-	GAT	7	0.43
Ovary	A_002744	878	878	-	CC	7	1
Testicle	A_002763	475	476	CA	-	10	0.5
Ovary	A_002771	1133	1137	CGTGG	-	6	0.5
Testicle	A_002783	733	734	TT	CG	9	0.56
Ovary	A_002824	1012	1012	-	GATGC	5	0.6
Testicle	A_002835	16	16	G	-	45	1
Muscle	A_002835	21	21	-	CG	62	0.98
Testicle	A_002835	21	21	-	CG	51	1
Muscle	A_002842	548	548	-	CAG	7	0.43
Ovary	A_002851	1198	1200	AAC	-	13	0.31
Muscle	A_002856	689	689	-	CAGTA	20	0.25
Testicle	A_002880	1071	1082	TACCTTGAGGTG	-	34	0.12
Ovary	A_002913	963	964	AA	-	15	0.2
Muscle	A_002915	1074	1074	-	C	18	1
Ovary	A_002915	1074	1074	-	C	22	0.95
Testicle	A_002915	1074	1074	-	C	11	1
Ovary	A_002917	630	631	CT	-	15	0.2
Ovary	A_002922	966	968	ATC	-	10	0.3
Ovary	A_002922	1002	1004	GAG	-	9	0.33
Ovary	A_002922	1009	1010	TT	GC	9	0.33
Muscle	A_002927	768	768	-	GGCTA	9	0.33
Ovary	A_002936	689	689	-	TAT	5	0.6
Ovary	A_002946	1062	1062	-	TT	47	0.47
Ovary	A_002946	1095	1095	A	TG	36	0.11
Ovary	A_002954	674	676	TAA	-	9	0.56
Ovary	A_002954	919	921	TTA	ACTTT	5	0.6
Ovary	A_003045	727	729	TTA	-	32	0.16
Ovary	A_003045	853	854	AT	-	33	0.12
Testicle	A_003067	772	773	AT	TC	8	0.75
Muscle	A_003090	761	761	-	ATA	3	1
Ovary	A_003111	267	267	-	TG	11	0.45
Ovary	A_003111	275	275	-	T	11	0.64
Ovary	A_003111	570	570	-	ACCATA	13	0.62
Ovary	A_003111	706	707	AG	-	9	0.33
Ovary	A_003114	715	720	TAGAGC	-	43	0.19
Ovary	A_003129	266	268	AAT	-	3	1
Muscle	A_003160	137	139	AGC	-	23	0.3
Testicle	A_003160	137	139	AGC	-	12	0.92
Testicle	A_003168	164	164	-	CAG	9	0.44
Ovary	A_003202	576	576	-	ATTTAT	11	0.27
Testicle	A_003216	43	43	-	AGT	5	0.6
Ovary	A_003223	354	355	GA	TT	8	0.5
Ovary	A_003223	530	531	TT	CC	7	0.57
Ovary	A_003265	884	884	-	TA	18	0.44
Ovary	A_003270	671	671	-	GAT	12	0.33
Ovary	A_003270	696	697	GT	-	11	0.36
Ovary	A_003270	733	734	GA	TT	10	0.4
Ovary	A_003283	644	644	-	CGTA	20	0.15
Testicle	A_003325	611	611	-	A	13	0.46
Muscle	A_003349	295	297	CAG	-	7	0.43
Ovary	A_003349	569	572	GTGG	-	3	1
Ovary	A_003369	78	78	-	GGT	11	0.64
Ovary	A_003369	79	92	AACGCGTTTGTCTT	-	11	0.27
Ovary	A_003417	681	681	-	TT	4	0.75
Ovary	A_003438	684	684	-	TGAGG	6	0.67
Ovary	A_003441	559	561	CGA	-	8	0.5
Ovary	A_003497	747	748	TT	-	10	0.4
Ovary	A_003578	78	80	TAA	CTAG	4	0.75
Muscle	A_003587	676	676	-	GCT	6	0.5
Testicle	A_003626	130	132	GCA	-	35	0.46
Ovary	A_003673	131	132	AG	GC	9	0.33
Ovary	A_003679	216	217	AT	-	22	0.14
Ovary	A_003679	604	605	AT	-	50	0.18
Muscle	A_003715	103	104	TA	-	5	0.6
Ovary	A_003735	492	492	-	CTA	11	0.27
Ovary	A_003735	495	497	GGT	-	11	0.27
Ovary	A_003741	375	375	-	CC	3	1
Ovary	A_003783	236	238	TAC	-	9	0.44
Ovary	A_003784	98	98	-	TGT	14	0.43
Ovary	A_003784	217	223	GCATTAT	ATTA	26	0.46
Ovary	A_003784	236	237	AG	-	33	0.18
Ovary	A_003784	245	246	TA	-	35	0.14
Ovary	A_003784	263	263	-	AT	40	0.27
Ovary	A_003784	299	300	CA	-	40	0.27
Ovary	A_003784	326	328	CTC	A	40	0.27
Ovary	A_003802	110	111	AG	-	11	0.45
Ovary	A_003802	176	176	C	TTG	15	0.53
Ovary	A_003802	296	296	-	TC	25	0.4
Ovary	A_003802	459	460	TC	GT	27	0.37
Ovary	A_003802	598	598	C	AG	25	0.12
Ovary	A_003844	108	109	TA	-	10	0.3
Ovary	A_003844	266	268	TAT	-	18	0.17
Ovary	A_003844	495	496	TC	AA	22	0.32
Muscle	A_003974	133	134	CC	A	4	0.75
Ovary	A_003982	431	432	GT	-	7	0.43
Ovary	A_003989	641	641	-	TCAC	20	0.15
Testicle	A_004016	356	356	-	G	9	0.78
Muscle	A_004016	729	730	AA	GC	13	0.62
Muscle	A_004016	736	737	TC	-	22	0.91
Muscle	A_004016	741	741	G	-	27	0.96
Ovary	A_004035	657	659	CTC	TTT	5	0.6
Ovary	A_004056	260	260	-	GACAG	7	0.57
Ovary	A_004056	380	382	TTA	-	10	0.3
Ovary	A_004056	637	641	TATGA	-	6	0.67
Ovary	A_004079	185	186	CT	ACC	7	0.57
Ovary	A_004079	220	220	A	TT	7	0.57
Ovary	A_004079	274	275	TC	-	8	0.37
Ovary	A_004079	537	537	-	TCA	8	0.37
Ovary	A_004079	543	543	G	AC	9	0.67
Muscle	A_004081	53	53	A	-	10	0.9
Ovary	A_004081	53	53	A	-	8	1
Testicle	A_004081	53	53	A	-	11	1
Muscle	A_004081	61	61	G	-	10	0.9
Ovary	A_004081	61	61	G	-	9	1
Testicle	A_004081	61	61	G	-	12	1
Muscle	A_004081	160	161	CA	-	38	0.18
Ovary	A_004081	160	161	CA	-	26	0.23
Testicle	A_004081	160	161	CA	-	29	0.31
Muscle	A_004081	176	176	G	-	35	0.31
Muscle	A_004081	178	178	G	-	31	0.32
Ovary	A_004081	178	182	GAGTA	-	20	0.6
Muscle	A_004081	179	179	A	-	31	0.45
Muscle	A_004081	181	181	T	-	31	0.9
Testicle	A_004081	181	181	T	-	23	0.96
Muscle	A_004081	182	182	A	-	31	0.52
Testicle	A_004081	182	182	-	GAGA	21	0.24
Ovary	A_004081	434	434	-	TGC	23	0.91
Ovary	A_004081	442	444	GCT	-	24	0.33
Muscle	A_004081	444	444	-	GC	23	0.87
Testicle	A_004081	444	444	-	GCT	14	0.5
Muscle	A_004081	445	445	-	T	23	0.74
Muscle	A_004081	673	674	AG	-	28	0.5
Ovary	A_004081	673	674	AG	-	37	0.43
Muscle	A_004081	675	675	-	GA	26	0.19
Ovary	A_004081	675	675	-	GA	35	0.29
Muscle	A_004108	260	265	TGCCTC	-	6	0.5
Ovary	A_004170	417	418	TC	GG	12	0.5
Muscle	A_004183	427	428	AC	TAT	10	0.4
Muscle	A_004348	89	89	-	TC	22	0.41
Muscle	A_004348	209	210	AC	GAA	32	0.37
Ovary	A_004397	358	359	TG	-	7	0.43
Ovary	A_004397	376	377	TT	AG	8	0.37
Ovary	A_004397	669	669	-	GTT	7	0.57
Testicle	A_004405	348	348	-	AG	11	0.45
Ovary	A_004443	520	522	GAA	-	14	0.29
Ovary	A_004443	577	578	GA	TT	16	0.37
Ovary	A_004473	255	256	GG	C	6	0.5
Ovary	A_004599	565	566	GG	AA	6	0.67
Ovary	A_004599	576	577	GG	AA	5	0.6
Ovary	A_004603	404	405	TT	CC	25	0.44
Ovary	A_004616	402	402	-	TA	6	0.5
Ovary	A_004618	184	184	A	GG	4	0.75
Ovary	A_004643	187	191	GAGTT	-	19	0.26
Ovary	A_004645	444	453	TTGGAAAATG	GGAAAAT	8	0.37
Ovary	A_004645	458	477	GCGTTTCTGCGTGTAAAGTG	CGTTTCTCGTGTAAAGTA	7	0.43
Ovary	A_004674	492	492	C	TT	4	0.75
Ovary	A_004697	159	162	CATT	TA	14	0.21
Ovary	A_004697	223	228	ATTCTA	CTG	23	0.17
Ovary	A_004697	244	245	AT	-	25	0.12
Ovary	A_004697	424	425	AC	-	29	0.17
Ovary	A_004697	559	605	TTCAGGAAACCAATATCAAAACCCCACCAAAGTTCCACGAAGACTTG	AAAGTTCCACGAAGACTT	7	0.43
Muscle	A_004704	328	328	A	GT	22	0.23
Ovary	A_004707	231	232	TG	-	6	0.5
Ovary	A_004729	144	147	ATTT	-	11	0.45
Ovary	A_004729	388	390	TGC	-	18	0.22
Ovary	A_004765	208	208	-	AT	20	0.5
Ovary	A_004765	352	352	-	T	29	0.45
Ovary	A_004765	529	531	AAT	-	21	0.29
Ovary	A_004797	352	352	-	GGT	5	1
Testicle	A_004797	354	362	TTCAGGGTC	-	3	1
Ovary	A_004801	403	405	ACT	GACC	8	0.5
Muscle	A_004810	504	508	CGAAA	G	13	0.31
Ovary	A_004810	513	513	-	C	10	1
Testicle	A_004810	513	513	-	C	10	1
Ovary	A_004848	378	380	AAA	CAG	5	0.6
Ovary	A_004852	226	228	TGT	A	5	0.6
Ovary	A_004852	319	329	AGAAGGCCTGG	-	8	0.37
Ovary	A_004852	393	393	-	AG	6	0.5
Muscle	A_004876	304	306	TGA	-	8	0.5
Testicle	A_004898	362	366	CAGTA	-	14	0.29
Testicle	A_004931	569	569	A	-	25	1
Testicle	A_004992	172	173	AG	CC	3	1
Muscle	A_004992	508	508	C	-	12	1
Testicle	A_004992	508	508	C	-	15	0.73
Muscle	A_004992	592	592	-	G	7	1
Ovary	A_004992	592	592	-	G	9	1
Testicle	A_004992	592	592	-	G	12	0.67
Muscle	A_004992	594	594	G	-	7	1
Ovary	A_004992	594	594	G	-	9	1
Testicle	A_004992	594	594	G	-	12	0.67
Ovary	A_005019	161	163	TAT	AATAA	6	0.5
Muscle	A_005037	484	484	-	GT	8	0.37
Ovary	A_005072	427	428	GC	AGT	12	0.33
Muscle	A_005179	519	519	G	-	346	1
Ovary	A_005188	461	462	GT	-	7	0.43
Testicle	A_005189	428	432	TTTTT	CTTTG	7	0.43
Ovary	A_005191	114	114	-	TA	14	0.36
Ovary	A_005191	161	161	G	-	15	0.67
Ovary	A_005201	279	281	CGG	-	6	0.5
Ovary	A_005238	470	471	AA	GAT	5	0.8
Ovary	A_005254	100	100	G	-	11	0.64
Ovary	A_005254	126	128	TTC	CTTA	10	0.6
Ovary	A_005263	447	447	-	C	9	0.78
Ovary	A_005263	503	503	T	-	12	0.58
Ovary	A_005282	200	201	AC	TA	9	0.56
Ovary	A_005282	309	310	CT	AACC	13	0.38
Ovary	A_005282	342	346	TCAAC	-	10	0.4
Ovary	A_005286	234	235	TG	-	7	0.43
Ovary	A_005353	358	358	T	CAAC	8	0.37
Ovary	A_005391	170	172	AAG	GTC	9	0.44
Ovary	A_005402	359	360	CA	G	7	0.43
Ovary	A_005430	130	130	-	GT	6	0.5
Ovary	A_005430	389	391	ATT	-	11	0.27
Ovary	A_005430	411	411	-	TCC	9	0.33
Muscle	A_005460	351	351	A	GGG	3	1
Muscle	A_005460	362	362	T	GCAG	3	1
Testicle	A_005461	193	194	AA	TAT	11	0.27
Ovary	A_005467	149	151	CTG	TCTT	6	0.5
Ovary	A_005469	221	222	TA	-	5	0.6
Ovary	A_005515	227	227	C	GG	4	1
Ovary	A_005526	251	252	CC	A	10	0.3
Muscle	A_005563	550	550	G	-	19	1
Testicle	A_005563	550	550	G	-	11	1
Ovary	A_005609	254	254	-	CCGG	24	0.5
Ovary	A_005609	272	272	-	AGCCAA	24	0.5
Ovary	A_005609	317	319	TTC	-	26	0.38
Muscle	A_005610	155	155	-	TCT	7	0.57
Ovary	A_005677	125	126	CC	G	7	0.86
Ovary	A_005698	90	91	CC	TG	9	0.56
Ovary	A_005698	140	140	G	CC	5	0.8
Ovary	A_005820	246	248	GGC	AGGT	15	0.27
Ovary	A_005820	361	361	-	TCAC	10	0.4
Ovary	A_005831	116	139	CCGAATTTTGTACGTCCCGAGGGC	-	13	0.46
Ovary	A_005831	430	431	AG	-	9	0.33
Ovary	A_005855	350	350	-	AGT	6	0.5
Ovary	A_005984	266	267	AG	TAC	9	0.44
Ovary	A_005984	284	285	TT	GC	9	0.44
Testicle	A_006050	104	107	TGAC	ATGAA	637	0.4
Testicle	A_006050	164	164	-	A	537	0.32
Testicle	A_006050	168	170	CGG	T	530	0.1
Testicle	A_006050	228	229	CG	GA	505	0.22
Muscle	A_006050	323	324	CG	-	67	0.98
Testicle	A_006050	325	325	-	G	127	0.85
Testicle	A_006050	326	327	AT	GCG	116	0.9
Ovary	A_006076	360	360	C	GA	8	0.37
Muscle	A_006085	219	220	GG	CA	5	0.6
Ovary	A_006109	21	23	GTT	CTGTGTG	5	0.6
Testicle	A_006125	242	242	G	CA	6	0.67
Ovary	A_006131	196	197	TG	AGTTTT	8	0.5
Ovary	A_006131	207	209	AGT	GGG	8	0.5
Ovary	A_006131	259	261	AAT	TAA	9	0.44
Ovary	A_006131	398	400	CAG	-	8	0.37
Ovary	A_006158	210	211	AA	-	25	0.32
Ovary	A_006158	306	309	ATAT	-	27	0.19
Ovary	A_006158	446	447	TA	-	20	0.2
Ovary	A_006196	404	405	AA	G	8	0.37
Testicle	A_006200	5	5	-	AAG	7	0.71
Testicle	A_006200	138	139	TT	C	146	0.12
Testicle	A_006200	202	203	TA	CT	177	0.32
Testicle	A_006200	249	251	CTT	TG	85	0.11
Testicle	A_006200	358	359	AT	GG	69	0.45
Testicle	A_006200	364	366	CGG	TTT	68	0.53
Testicle	A_006200	373	375	GAA	-	48	0.33
Testicle	A_006200	377	377	-	TAT	48	0.33
Testicle	A_006200	506	506	-	G	117	0.74
Muscle	A_006252	15	18	AGAG	-	14	0.57
Ovary	A_006252	15	18	AGAG	-	13	0.69
Testicle	A_006252	15	18	AGAG	-	7	1
Muscle	A_006252	38	39	GG	-	31	0.16
Ovary	A_006252	38	43	GGTTGT	-	31	0.29
Muscle	A_006252	40	44	TTGTG	-	31	0.39
Muscle	A_006252	52	52	-	CCTGC	32	0.75
Ovary	A_006252	64	64	-	CTGCC	41	0.8
Testicle	A_006252	64	64	-	CTGCC	24	0.96
Muscle	A_006252	175	178	TGCC	-	38	0.63
Ovary	A_006252	175	178	TGCC	-	39	0.49
Testicle	A_006252	175	178	TGCC	-	26	0.65
Muscle	A_006252	187	189	GAG	A	35	0.57
Ovary	A_006252	187	189	GAG	A	36	0.86
Testicle	A_006252	187	189	GAG	A	24	1
Testicle	A_006252	274	278	AGCCA	GCG	22	0.95
Muscle	A_006252	280	280	A	-	42	0.57
Ovary	A_006252	280	280	A	-	40	0.57
Muscle	A_006252	311	311	-	TGCGGCGG	44	0.61
Ovary	A_006252	311	311	-	TGCGGCGG	40	0.77
Testicle	A_006252	311	311	-	TGCGGCGG	26	0.65
Testicle	A_006252	378	379	AG	-	26	0.19
Muscle	A_006252	381	383	AGC	-	45	0.98
Ovary	A_006252	381	383	AGC	-	42	0.88
Testicle	A_006252	381	383	AGC	-	26	0.92
Muscle	A_006252	422	422	A	-	48	0.65
Testicle	A_006252	423	423	G	-	30	0.67
Ovary	A_006263	327	327	-	CG	9	0.33
Ovary	A_006263	336	338	ATC	-	9	0.56
Ovary	A_006263	460	462	CCC	TCG	9	0.33
Ovary	A_006265	207	209	AAT	-	11	0.27
Testicle	A_006357	176	177	TT	CTG	8	0.75
Testicle	A_006357	279	279	C	-	7	1
Testicle	A_006357	354	355	GA	AGG	4	1
Ovary	A_006403	211	212	AT	-	7	0.57
Ovary	A_006417	189	189	-	TTG	7	0.43
Ovary	A_006503	84	87	CGTT	-	4	0.75
Ovary	A_006503	135	137	ACA	GGG	3	1
Ovary	A_006551	75	75	C	GCA	4	0.75
Ovary	A_006551	436	436	-	ATGTAA	5	0.6
Ovary	A_006554	93	93	-	CG	5	0.6
Ovary	A_006560	123	123	-	GT	18	0.17
Ovary	A_006560	309	309	C	-	24	0.5
Ovary	A_006560	404	404	-	TAG	24	0.33
Ovary	A_006571	329	329	-	GA	9	0.44
Ovary	A_006595	23	26	ATTT	CATTC	11	0.27
Ovary	A_006595	42	42	-	GT	13	0.23
Ovary	A_006595	106	108	CAT	-	12	0.25
Ovary	A_006595	282	284	GCT	A	16	0.19
Ovary	A_006654	153	154	TT	CC	14	0.5
Ovary	A_006679	197	198	AA	-	8	0.37
Ovary	A_006679	261	261	-	GT	11	0.45
Ovary	A_006679	319	321	GTT	-	11	0.36
Ovary	A_006713	201	203	TTA	-	6	0.5
Ovary	A_006770	177	178	TG	CAC	11	0.36
Ovary	A_006814	97	98	CC	AA	10	0.5
Ovary	A_006814	188	188	-	TCT	14	0.57
Muscle	A_006903	153	153	A	-	22	0.55
Muscle	A_006903	163	163	-	ACT	14	0.29
Muscle	A_006903	167	167	-	CCT	11	0.36
Ovary	A_007002	341	341	-	AGACCA	6	0.5
Muscle	A_007025	380	380	-	TG	5	0.6
Ovary	A_007039	34	36	GGA	AGG	12	0.33
Ovary	A_007062	199	201	GAG	-	7	0.43
Ovary	A_007075	38	41	AAGA	GAAGG	4	1
Ovary	A_007111	78	79	GC	AT	6	0.5
Muscle	A_007119	190	191	TG	AA	14	0.79
Muscle	A_007153	107	107	C	-	12	0.58
Testicle	A_007153	107	107	C	-	8	0.75
Ovary	A_007155	221	222	AA	GG	6	0.5
Muscle	A_007198	247	247	-	CTC	7	0.57
Ovary	A_007211	102	104	TGA	ATTTC	7	0.57
Ovary	A_007211	136	136	-	TG	8	0.37
Ovary	A_007211	244	246	TTT	ATC	8	0.37
Ovary	A_007242	133	134	TG	AA	6	0.5
Ovary	A_007242	332	346	AGCTGGAAAACGTAG	GAAAACGT	5	0.6
Ovary	A_007242	402	404	AAG	CAA	7	0.43
Ovary	A_007268	62	63	CA	TCT	4	0.75
Ovary	A_007268	159	159	-	GT	9	0.67
Ovary	A_007268	184	185	TA	-	9	0.56
Ovary	A_007268	246	247	CT	-	11	0.27
Ovary	A_007304	150	151	CT	GGC	6	0.5
Ovary	A_007304	192	194	TTT	GTGTCC	6	0.5
Ovary	A_007308	156	157	AG	GA	16	0.25
Ovary	A_007308	191	191	-	TTA	16	0.31
Ovary	A_007315	134	134	-	AACA	13	0.38
Ovary	A_007315	188	188	C	TT	13	0.38
Ovary	A_007315	376	377	AA	CG	8	0.62
Ovary	A_007321	298	300	AGA	-	53	0.64
Muscle	A_007321	298	302	AGAGT	C	43	0.51
Ovary	A_007321	301	301	G	-	51	0.49
Testicle	A_007321	302	302	T	AGC	26	0.69
Ovary	A_007435	254	255	AA	-	14	0.64
Ovary	A_007435	293	293	A	GG	13	0.69
Ovary	A_007435	338	338	C	-	13	0.77
Ovary	A_007488	363	363	G	AA	5	0.6
Ovary	A_007586	209	209	A	CAACAT	12	0.33
Muscle	A_007657	102	102	T	-	10	1
Muscle	A_007679	118	119	TC	-	34	0.47
Muscle	A_007679	125	125	-	T	32	0.87
Muscle	A_007812	12	12	C	-	242	1
Muscle	A_007812	125	125	-	G	314	0.99
Muscle	A_007823	87	87	G	-	10	0.9
Ovary	A_007823	87	87	G	-	9	1
Muscle	A_007827	168	168	-	T	126	1
Ovary	A_007827	168	168	-	T	112	0.99
Testicle	A_007827	168	168	-	T	113	0.99
Ovary	A_007862	61	62	CC	G	9	0.56
Ovary	A_007862	141	144	CGGC	GT	13	0.62
Muscle	A_007917	61	61	-	T	19	1
Ovary	A_007917	61	61	-	T	24	1
Testicle	A_007917	61	61	-	T	13	0.92
Muscle	A_007917	172	172	-	G	9	1
Muscle	A_007951	196	196	G	CC	60	1
Ovary	A_007951	196	196	G	CC	60	0.98
Ovary	A_008007	320	320	T	-	34	1
Ovary	A_008034	185	188	ATCT	GATCCTC	11	0.36
Ovary	A_008034	297	300	ATAC	CATAA	9	0.67
Testicle	A_008043	127	127	-	T	23	0.87
Testicle	A_008043	184	186	TCC	CCT	12	0.5
Ovary	A_008107	248	248	-	GT	8	0.37
Muscle	A_008111	102	102	-	TCA	182	0.19
Muscle	A_008119	158	158	-	A	314	1
Ovary	A_008119	158	158	-	A	294	1
Testicle	A_008119	158	158	-	A	217	1
Muscle	A_008119	304	305	CA	-	20	0.9
Testicle	A_008128	198	199	AA	-	9	0.44
Muscle	A_008182	77	77	G	-	63	0.16
Muscle	A_008182	148	148	C	-	37	0.95
Muscle	A_008182	151	151	-	C	29	0.79
Muscle	A_008182	167	172	CCTTTT	TCCTTTTC	18	0.78
Muscle	A_008182	231	231	A	-	10	1
Muscle	A_008216	145	145	G	-	49	0.84
Ovary	A_008216	145	145	G	-	45	0.76
Testicle	A_008216	145	145	G	-	31	0.77
Ovary	A_008216	149	149	-	G	37	0.65
Testicle	A_008216	149	149	-	G	29	0.72
Muscle	A_008216	150	151	CA	GC	40	0.75
Muscle	A_008216	152	152	-	G	38	0.68
Ovary	A_008217	182	183	CA	-	9	0.67
Ovary	A_008217	184	185	TG	-	9	0.33
Muscle	A_008231	89	89	C	GCA	13	0.23
Muscle	A_008235	144	144	-	TT	7	0.57
Ovary	A_008239	65	65	A	CAT	5	0.6
Muscle	A_008240	20	20	G	-	20	0.95
Ovary	A_008240	20	20	G	-	12	0.83
Testicle	A_008240	21	23	CCC	A	14	0.29
Testicle	A_008240	36	36	A	TACT	16	0.31
Muscle	A_008240	60	63	GAGA	-	22	0.68
Ovary	A_008240	60	63	GAGA	-	14	0.71
Testicle	A_008240	60	63	GAGA	-	15	0.4
Muscle	A_008249	50	50	-	T	24	0.87
Muscle	A_008249	124	125	GT	A	137	0.99
Muscle	A_008257	78	78	C	ATCCT	7	0.43
Muscle	A_008262	121	121	T	-	61	0.46
Ovary	A_008262	121	121	T	-	71	0.37
Ovary	A_008283	73	73	A	-	16	0.56
Ovary	A_008283	83	83	A	-	12	0.58
Muscle	A_008295	167	168	GT	-	13	0.31
Muscle	A_008297	11	11	-	T	7	1
Ovary	A_008297	32	32	C	-	11	0.73
Ovary	A_008297	51	51	A	-	18	0.44
Ovary	A_008297	69	69	-	AA	26	0.15
Ovary	A_008297	100	101	CA	T	17	0.18
Ovary	A_008297	118	118	G	TA	15	0.2
Muscle	A_008303	5	5	-	A	15	0.73
Muscle	A_008303	54	54	G	-	22	0.32
Muscle	A_008303	101	101	G	AC	20	0.2
Ovary	A_008303	120	120	C	-	13	0.54
Testicle	A_008322	39	39	A	-	12	0.67
Testicle	A_008322	42	44	AAG	-	12	0.5
Testicle	A_008332	131	132	GC	TA	158	0.11
Ovary	A_008340	36	36	-	TTC	8	0.5
Muscle	A_008379	101	101	-	A	23	0.91
									Prefix indicates;
									A: All mearged samples from three libraries
									O: Ovary library
									M: Muscle library
									T: Testicle library
